# Supplementary material for: Dysregulation of sonic hedgehog signaling causes hearing loss in ciliopathy mouse models
Source: eLife. 2020 Dec 31;9:e56551. doi: 10.7554/eLife.56551 (PMC7806262; doi:10.7554/eLife.56551)
Supplement: Figure 1—figure supplement 1—source data 1. [file elife-56551-fig1-figsupp1-data1.xlsx]

## Sheet: Cilia number 
Figure 1-figure supplement 1B
cilia in 80um2 square in each part were counted.
	Control				cKO
	Lumenal cilia				Lumenal cilia
	VM	VL	DM	DL	VM	VL	DM	DL			Sidak's multiple comparisons test	Mean Diff.	95.00% CI of diff.	Significant?	Summary	Adjusted P Value
PFT621	64	60	43	14	3	2	3	0
190421 sample	58	56	40	19	0	0	5	1			Control cilia number
PFT681	71	40	28	20	1	0	9	1			VM vs. VL	12.33	-1.103 to 25.77	No	ns	0.0821
Average	64.3333	52	37	17.6667	1.33333	0.666667	5.66667	0.666667			VM vs. DM	27.33	13.90 to 40.77	Yes	****	<0.0001
STDEV	6.50641	10.583	7.93725	3.21455	1.52753	1.1547	3.05505	0.57735			VM vs. DL	46.67	33.23 to 60.10	Yes	****	<0.0001
											VL vs. DM	15	1.564 to 28.44	Yes	*	0.0243
											VL vs. DL	34.33	20.90 to 47.77	Yes	****	<0.0001
											DM vs. DL	19.33	5.897 to 32.77	Yes	**	0.0032
											Ift88 cKO cilia number
											VM vs. VL	0.6667	-12.77 to 14.10	No	ns	>0.9999
											VM vs. DM	-4.333	-17.77 to 9.103	No	ns	0.9231
											VM vs. DL	0.6667	-12.77 to 14.10	No	ns	>0.9999
											VL vs. DM	-5	-18.44 to 8.436	No	ns	0.8619
											VL vs. DL	3.553e-15	-13.44 to 13.44	No	ns	>0.9999
											DM vs. DL	5	-8.436 to 18.44	No	ns	0.8619

## Sheet: In situ intensity
Figure 1-figure supplement 1B & C
Wild type (epithelium)						Ift88 cKO (epithelium)						Wild type (mesenchyme)							Ift88 cKO (mesenchyme)												Average		VM	VL	DM	DL						t-test
6x6um square						6x6um square						6x6um square						6x6um square													EP	Control	1	0.748374	0.541441	0.208328		Control				EP				Control vs Ift88 cKO
VM	175629	196817	148962			VM	132752	107070	85482			VM	151269	130541	129196			VM	141700	139032	100971											Ift88 cKO	0.552992	0.48719	0.413768	0.396966		0.0289129	0.05*			VM vs VL		EP	VM	0.297287	0.05*
VL	161061	158751	114616			VL	114808	102959	84791			VL	94114	111478	95789			VL	98183	103230	82794										MS	Control	0.680616	0.36348	0.137911	0.209288		0.0471572	0.05*			VL vs DM			VL	0.0194591	ns
DM	126385	130381	106131			DM	106076	99168	71934			DM	61601	85734	76073			DM	72619	84611	48236											Ift88 cKO	0.71615	0.434102	0.206311	0.302049		0.00866365	0.01**			VM vs DM			DM	0.0583649	0.05*
DL	78940	93992	74817			DL	92689	91565	87116			DL	81740	92657	73684			DL	87807	83111	67642																	0.0045065	0.005***			VM vs DL			DL	0.00408946	0.05*
																															STDEV		VM	VL	DM	DL		0.0184118	0.05*			VL vs DL
6x6um square (- background)				average		6x6um square (- background)				average		6x6um square (- background)				average		6x6um square (- background)				average									EP	Control	0.064079	0.139044	0.0663907	0.0672084
VM	118374	120510	106788	115224		VM	132752	107070	85482	108435		VM	94014	54234	87022	78423.3		VM	141700	139032	100971	127234										Ift88 cKO	0.14064	0.130847	0.0914966	0.209084						t-test
VL	103806	82444	72442	86230.7		VL	114808	102959	84791	100853		VL	36859	35171	53615	41881.7		VL	98183	103230	82794	94735.7									MS	Control	0.184322	0.0884916	0.137135	0.0658437						MS
DM	69130	54074	63957	62387		DM	106076	99168	71934	92392.7		DM	4346	9427	33899	15890.7		DM	72619	84611	48236	68488.7										Ift88 cKO	0.0448496	0.143597	0.0888761	0.148316		0.0406437	0.05*			VM vs VL		MS	VM	0.0698924	ns
DL	21685	17685	32643	24004.3		DL	92689	91565	87116	90456.7		DL	24485	16350	31510	24115		DL	87807	83111	67642	79520			STDEV													0.00981539	0.01**			VL vs DM			VL	0.0239235	ns
																									WT	WT	Ift88 cKO	Ift88 cKO										0.0226388	0.05*			VM vs DM			DM	0.0558756	ns
6x6um square (- background, % value)						6x6um square (- background, % value)						6x6um square (- background, % value)						6x6um square (- background, % value)							EP	MS	EP	MS										0.0136301	0.05*			VM vs DL			DL	0.014619	ns
VM	1.02734	1.04588	0.926786	1		VM	1.15212	0.929233	0.741877	0.941077		VM	0.815924	0.470683	0.755242	0.680616		VM	1.22978	1.20662	0.876302	1.10423		VM	0.064079	0.184322	0.205378	0.197735										0.0124581	0.05*			VL vs DL
VL	0.900906	0.715511	0.628706	0.748374		VL	0.99639	0.893555	0.73588	0.875275		VL	0.31989	0.30524	0.465311	0.36348		VL	0.852105	0.895907	0.718548	0.822187		VL	0.139044	0.0884916	0.131214	0.0923871
DM	0.599962	0.469295	0.555067	0.541441		DM	0.920607	0.860654	0.624297	0.801853		DM	0.0377178	0.0818146	0.294201	0.137911		DM	0.630242	0.734318	0.418628	0.594396		DM	0.0663907	0.137135	0.156662	0.160868
DL	0.188199	0.153484	0.2833	0.208328		DL	0.804424	0.79467	0.756058	0.785051		DL	0.212499	0.141898	0.273467	0.209288		DL	0.762055	0.721299	0.587048	0.690134		DL	0.0672084	0.0658437	0.0255779	0.0915714														Two way ANOVA
																																						Control				EP				Control vs Ift88 cKO
Background						Background																																0.14	No			VM vs VL		EP	VM	0.002	Yes**
Control	57255	76307	42174			Ift88 cKO	58453	62008	13689																													0.34	No			VL vs DM			VL	0.08	No
																																						0.002	Yes**			VM vs DM			DM	0.89	No
																																						<0.001	Yes**			VM vs DL			DL	0.32	No
																																						<0.001	Yse***			VL vs DL
																																										t-test
																																										MS
																																						0.0406437	0.05*			VM vs VL		MS	VM	0.359331	ns
																																						0.00981539	0.01**			VL vs DM			VL	0.0824151	ns
																																						0.0226388	0.05*			VM vs DM			DM	0.0849701	ns
																																						0.0136301	0.05*			VM vs DL			DL	0.105302	ns
																																						0.0124581	0.05*			VL vs DL
