# Supplementary material for: Dysregulation of sonic hedgehog signaling causes hearing loss in ciliopathy mouse models
Source: eLife. 2020 Dec 31;9:e56551. doi: 10.7554/eLife.56551 (PMC7806262; doi:10.7554/eLife.56551)
Supplement: Figure 2—figure supplement 1—source data 1. [file elife-56551-fig2-figsupp1-data1.xlsx]

## Sheet: Ciliary diameters and tips
	Figure 2-figure supplement 1E
	Wild type 1																Tbc1d32bromi 1
	Base	Swollen tip ratio	tip diameter(um)			Mid	Swollen tip ratio	tip diameter(um)			Apex	Swollen tip ratio	tip diameter(um)				Base	Swollen tip ratio	tip diameter(um)			Mid	Swollen tip ratio	tip diameter(um)			Apex	Swollen tip ratio	tip diameter(um)
	1		0.332			1		0.447			1		0.29				1		0.358			1		0.45			1		0.371
	2	0.03125	0.286			2	0.03125	0.287918			2	0.0333333	0.266				2	0.685714	0.475			2	0.46875	0.413			2	0.5	0.374
	3		0.298			3		0.24899			3		0.287				3		0.339			3		0.44			3		0.432
	4		0.239			4		0.283511			4		0.271				4		0.453			4		0.379			4		0.351
	5		0.295			5		0.279838			5		0.286				5		0.399			5		0.386			5		0.329
	6		0.261			6		0.301138			6		0.284				6		0.376			6		0.397			6		0.333
	7		0.285			7		0.273228			7		0.286				7		0.445			7		0.425			7		0.366
	8		0.246			8		0.283511			8		0.271				8		0.362			8		0.402			8		0.356
	9		0.252			9		0.257804			9		0.28				9		0.333			9		0.397			9		0.345
	10		0.293			10		0.271759			10		0.267				10		0.373			10		0.44			10		0.327
	11		0.3			11		0.268087			11		0.307				11		0.349			11		0.399			11		0.234
	12		0.261			12		0.262211			12		0.279				12		0.341			12		0.383			12		0.354
	13		0.259			13		0.283511			13		0.266				13		0.415			13		0.48			13		0.383
	14		0.262			14		0.279104			14		0.288				14		0.439			14		0.358			14		0.377
	15		0.263			15		0.282042			15		0.274				15		0.401			15		0.399			15		0.287
	16		0.268			16		0.279104			16		0.286				16		0.449			16		0.313			16		0.397
	17		0.269			17		0.283511			17		0.282				17		0.446			17		0.286			17		0.355
	18		0.29			18		0.276166			18		0.262				18		0.399			18		0.316			18		0.339
	19		0.276			19		0.2769			19		0.27				19		0.428			19		0.285			19		0.334
	20		0.273			20		0.251194			20		0.285				20		0.393			20		0.277			20		0.29
	21		0.275			21		0.283511			21		0.26				21		0.404			21		0.277			21		0.309
	22		0.27			22		0.287183			22		0.29				22		0.404			22		0.284			22		0.291
	23		0.278			23		0.261476			23		0.284				23		0.437			23		0.287			23		0.291
	24		0.284			24		0.2769			24		0.314				24		0.42			24		0.269			24		0.286
	25		0.268			25		0.296732			25		0.306				25		0.259			25		0.303			25		0.238
	26		0.291			26		0.262945			26		0.329				26		0.242			26		0.29			26		0.279
	27		0.278			27		0.268821			27		0.321				27		0.285			27		0.291			27		0.307
	28		0.269			28		0.271759			28		0.305				28		0.269			28		0.295			28		0.259
	29		0.292			29		0.267352			29		0.331				29		0.268			29		0.271			29		0.154
	30		0.22			30		0.271025			30		0.304				30		0.278			30		0.282			30		0.288
	31		0.243			31		0.2769				30	1				31		0.284			31		0.307				30	15
	32		0.27			32		0.276166									32		0.295			32		0.326
		32	1				32	1									33		0.289				32	15
																	34		0.299
																	35		0.283
																		35	24
	Wild type 2																Tbc1d32bromi 2
	Base	Swollen tip ratio	tip diameter(um)			Mid	Swollen tip ratio	tip diameter(um)			Apex	Swollen tip ratio	tip diameter(um)				Base	Swollen tip ratio	tip diameter(um)			Mid	Swollen tip ratio	tip diameter(um)			Apex	Swollen tip ratio	tip diameter(um)
	1		0.33			1		0.357			1		0.453				1		0.462			1		0.434			1		0.379
	2	0.235294	0.464			2	0.175	0.416			2	0.387097	0.41				2	0.571429	0.392			2	0.694444	0.458			2	0.514286	0.377
	3		0.343			3		0.453			3		0.377				3		0.35			3		0.395			3		0.428
	4		0.388			4		0.419			4		0.406				4		0.43			4		0.47			4		0.383
	5		0.375			5		0.446			5		0.393				5		0.45			5		0.445			5		0.396
	6		0.402			6		0.395			6		0.431				6		0.387			6		0.452			6		0.48
	7		0.466			7		0.392			7		0.36				7		0.41			7		0.396			7		0.458
	8		0.346			8		0.297			8		0.471				8		0.438			8		0.377			8		0.354
	9		0.279			9		0.313			9		0.413				9		0.388			9		0.485			9		0.427
	10		0.263			10		0.292			10		0.376				10		0.422			10		0.377			10		0.366
	11		0.274			11		0.29			11		0.342				11		0.414			11		0.427			11		0.455
	12		0.276			12		0.3			12		0.377				12		0.485			12		0.386			12		0.459
	13		0.277			13		0.298			13		0.269				13		0.528			13		0.443			13		0.386
	14		0.287			14		0.302			14		0.274				14		0.446			14		0.412			14		0.417
	15		0.268			15		0.309			15		0.3				15		0.488			15		0.403			15		0.417
	16		0.295			16		0.295			16		0.296				16		0.386			16		0.43			16		0.457
	17		0.265			17		0.301			17		0.259				17		0.407			17		0.438			17		0.453
	18		0.298			18		0.314			18		0.295				18		0.428			18		0.434			18		0.418
	19		0.277			19		0.289			19		0.28				19		0.427			19		0.472			19		0.293
	20		0.254			20		0.271			20		0.261				20		0.392			20		0.399			20		0.228
	21		0.258			21		0.286			21		0.277				21		0.287			21		0.355			21		0.284
	22		0.255			22		0.302			22		0.3				22		0.256			22		0.465			22		0.281
	23		0.287			23		0.295			23		0.252				23		0.273			23		0.428			23		0.315
	24		0.297			24		0.318			24		0.263				24		0.292			24		0.497			24		0.241
	25		0.289			25		0.297			25		0.251				25		0.279			25		0.463			25		0.277
	26		0.294			26		0.305			26		0.285				26		0.31			26		0.317			26		0.278
	27		0.293			27		0.298			27		0.265				27		0.314			27		0.292			27		0.259
	28		0.273			28		0.294			28		0.274				28		0.289			28		0.274			28		0.277
	29		0.287			29		0.301			29		0.241				29		0.294			29		0.289			29		0.275
	30		0.302			30		0.305			30		0.251				30		0.281			30		0.285			30		0.287
	31		0.291			31		0.297			31		0.272				31		0.279			31		0.289			31		0.283
	32		0.27			32		0.291				31	12				32		0.257			32		0.277			32		0.268
	33		0.294			33		0.284									33		0.297			33		0.261			33		0.273
	34		0.267			34		0.302									34		0.291			34		0.274			34		0.275
		34	8			35		0.289									35		0.261			35		0.293			35		0.287
						36		0.282										35	20			36		0.303				35	18
						37		0.298															36	25
						38		0.287
						39		0.293
						40		0.292
							40	7
	Wild type 3																Tbc1d32bromi 3
	Base	Swollen tip ratio	tip diameter(um)			Mid	Swollen tip ratio	tip diameter(um)			Apex	Swollen tip ratio	tip diameter(um)				Base	Swollen tip ratio	tip diameter(um)			Mid	Swollen tip ratio	tip diameter(um)			Apex	Swollen tip ratio Two way ANOVA	tip diameter(um)
	1		0.405			1		0.383			1		0.426				1		0.401			1		0.426			1		0.38
	2	0.3	0.384			2	0.0882353	0.41			2	0.205128	0.404				2	0.666667	0.445			2	0.53125	0.371			2	0.571429	0.391
	3		0.387			3		0.34			3		0.476				3		0.383			3		0.382			3		0.471
	4		0.347			4		0.324			4		0.421				4		0.411			4		0.447			4		0.378
	5		0.38			5		0.325			5		0.46				5		0.386			5		0.41			5		0.435
	6		0.389			6		0.305			6		0.442				6		0.392			6		0.383			6		0.419
	7		0.351			7		0.29			7		0.418				7		0.366			7		0.379			7		0.472
	8		0.359			8		0.268			8		0.288				8		0.417			8		0.381			8		0.458
	9		0.394			9		0.278			9		0.305				9		0.354			9		0.37			9		0.472
	10		0.277			10		0.28			10		0.276				10		0.405			10		0.448			10		0.477
	11		0.286			11		0.26			11		0.295				11		0.383			11		0.42			11		0.404
	12		0.266			12		0.265			12		0.292				12		0.422			12		0.44			12		0.438
	13		0.247			13		0.26			13		0.301				13		0.418			13		0.374			13		0.394
	14		0.249			14		0.307			14		0.317				14		0.364			14		0.448			14		0.431
	15		0.295			15		0.282			15		0.315				15		0.413			15		0.381			15		0.35
	16		0.27			16		0.29			16		0.296				16		0.385			16		0.399			16		0.349
	17		0.248			17		0.293			17		0.283				17		0.434			17		0.402			17		0.421
	18		0.259			18		0.297			18		0.286				18		0.404			18		0.314			18		0.376
	19		0.292			19		0.285			19		0.298				19		0.365			19		0.288			19		0.336
	20		0.265			20		0.266			20		0.254				20		0.406			20		0.262			20		0.385
	21		0.286			21		0.311			21		0.316				21		0.292			21		0.298			21		0.28
	22		0.292			22		0.274			22		0.313				22		0.271			22		0.271			22		0.261
	23		0.244			23		0.283			23		0.302				23		0.306			23		0.282			23		0.261
	24		0.271			24		0.303			24		0.303				24		0.282			24		0.284			24		0.279
	25		0.285			25		0.31			25		0.313				25		0.289			25		0.31			25		0.309
	26		0.272			26		0.273			26		0.297				26		0.273			26		0.281			26		0.275
	27		0.279			27		0.285			27		0.319				27		0.272			27		0.299			27		0.255
	28		0.284			28		0.307			28		0.3				28		0.285			28		0.287			28		0.291
	29		0.237			29		0.281			29		0.3				29		0.273			29		0.297			29		0.275
	30		0.249			30		0.29			30		0.297				30		0.289			30		0.282			30		0.297
		30	9			31		0.287			31		0.317					30	20			31		0.284			31		0.281
						32		0.277			32		0.32									32		0.256			32		0.27
						33		0.306			33		0.295										32	17			33		0.278
						34		0.327			34		0.285														34		0.302
							34	3			35		0.308														35		0.272
											36		0.338															35	20
											37		0.309
											38		0.291
											39		0.305
												39	8
				Base	Mid	Apex				Base	Mid	Apex
			Control	0.03125	0.03125	0.0333333		Average	Control	0.188848	0.0981618	0.208519
				0.235294	0.175	0.387097			Tbc1d32bromi	0.64127	0.564815	0.528571
				0.3	0.0882353	0.205128
			Average	0.188848	0.0981618	0.208519
			STDEV	0.148433	0.0768258	0.17814		STDEV	Control	0.148433	0.0768258	0.17814
									Tbc1d32bromi	0.0612295	0.116531	0.0377964
			Tbc1d32bromi	0.685714	0.46875	0.5
				0.571429	0.694444	0.514286
				0.666667	0.53125	0.571429
			Average	0.64127	0.564815	0.528571
			STDEV	0.0612295	0.116531	0.0377964
				Swollen tip ratio
				Bonferroni's multiple comparisons test	Mean Diff.	95.00% CI of diff.	Significant?	Summary	Adjusted P Value
				wild type - Tbc1d32bromi
				base	-0.4524	-0.7061 to -0.1987	Yes	***	<0.001
				mid	-0.4667	-0.7203 to -0.2130	Yes	***	<0.001
				apex	-0.3201	-0.5737 to -0.06638	Yes	*	0.01

## Sheet: ciliary diameters
Figure 2-figure supplement 1F
	1	2	3	4	5	6	7	8	9	10	11	12	13	14	15	16	17	18	19	20	21	22	23	24	25	26	27	28	29	30	31	32	33	34	35	36	37	38	39	40	41	42	43	44	45	46	47	48	49
Control base	0.332	0.286	0.298	0.239	0.295	0.261	0.285	0.246	0.252	0.293	0.3	0.261	0.259	0.262	0.263	0.268	0.269	0.29	0.276	0.273	0.275	0.27	0.278	0.284	0.268	0.291	0.278	0.269	0.292	0.22	0.243	0.27	0.33	0.464	0.343	0.388	0.375	0.402	0.466	0.346	0.279	0.263	0.274	0.276	0.277	0.287	0.268	0.295	0.265
Control mid	0.447	0.287918	0.24899	0.283511	0.279838	0.301138	0.273228	0.283511	0.257804	0.271759	0.268087	0.262211	0.283511	0.279104	0.282042	0.279104	0.283511	0.276166	0.2769	0.251194	0.283511	0.287183	0.261476	0.2769	0.296732	0.262945	0.268821	0.271759	0.267352	0.271025	0.2769	0.276166	0.357	0.416	0.453	0.419	0.446	0.395	0.392	0.297	0.313	0.292	0.29	0.3	0.298	0.302	0.309	0.295	0.301
Control Apex	0.29	0.266	0.287	0.271	0.286	0.284	0.286	0.271	0.28	0.267	0.307	0.279	0.266	0.288	0.274	0.286	0.282	0.262	0.27	0.285	0.26	0.29	0.284	0.314	0.306	0.329	0.321	0.305	0.331	0.304	0.453	0.41	0.377	0.406	0.393	0.431	0.36	0.471	0.413	0.376	0.342	0.377	0.269	0.274	0.3	0.296	0.259	0.295	0.28
Tbc1d32bromi base	0.358	0.475	0.339	0.453	0.399	0.376	0.445	0.362	0.333	0.373	0.349	0.341	0.415	0.439	0.401	0.449	0.446	0.399	0.428	0.393	0.404	0.404	0.437	0.42	0.259	0.242	0.285	0.269	0.268	0.278	0.284	0.295	0.289	0.299	0.283	0.462	0.392	0.35	0.43	0.45	0.387	0.41	0.438	0.388	0.422	0.414	0.485	0.528	0.446
Tbc1d32bromi mid	0.45	0.413	0.44	0.379	0.386	0.397	0.425	0.402	0.397	0.44	0.399	0.383	0.48	0.358	0.399	0.313	0.286	0.316	0.285	0.277	0.277	0.284	0.287	0.269	0.303	0.29	0.291	0.295	0.271	0.282	0.307	0.326	0.434	0.458	0.395	0.47	0.445	0.452	0.396	0.377	0.485	0.377	0.427	0.386	0.443	0.412	0.403	0.43	0.438
Tbc1d32bromi Apex	0.371	0.374	0.432	0.351	0.329	0.333	0.366	0.356	0.345	0.327	0.234	0.354	0.383	0.377	0.287	0.397	0.355	0.339	0.334	0.29	0.309	0.291	0.291	0.286	0.238	0.279	0.307	0.259	0.154	0.288	0.379	0.377	0.428	0.383	0.396	0.48	0.458	0.354	0.427	0.366	0.455	0.459	0.386	0.417	0.417	0.457	0.453	0.418	0.293
[truncated: 51 more columns]
