# Supplementary material for: Dysregulation of sonic hedgehog signaling causes hearing loss in ciliopathy mouse models
Source: eLife. 2020 Dec 31;9:e56551. doi: 10.7554/eLife.56551 (PMC7806262; doi:10.7554/eLife.56551)
Supplement: Figure 2—source data 1. [file elife-56551-fig2-data1.xlsx]

## Sheet: Cilk1 cilia lengths
	um	WT 10%			WT 50%			WT 90%			um	KO 10%			KO 50%			KO 90%
	Wild type 1	HC	SC		HC	SC		HC	SC		Cilk1 KO 1	HC	SC		HC	SC		HC	SC
		1.70658	1.54191		2.55987	1.75149		1.99101	1.76646			2.76945	2.48502		2.82933	2.79939		1.84131	3.00897
		1.22754	1.63173		2.0958	1.30239		1.66167	1.97604			2.23053	2.27544		2.8443	2.00598		1.58682	4.91016
		2.15568	1.85628		1.58682	2.14071		1.76646	2.48502			2.81436	2.63472		2.97903	2.75448		1.58682	3.8922
		1.67664	1.57185		1.7964	1.69161		0.64371	2.05089			2.38023	1.55688		3.87723	3.23352		1.93113	3.41316
		1.06287	2.18562		1.90119	1.9461		1.31736	1.69161			2.55987	3.27843		3.1437	3.02394		1.99101	3.18861
		1.40718	1.7964		1.42215	1.52694		1.40718	2.00598			2.30538	2.82933		3.09879	5.22453		2.48502	2.41017
		1.0479	2.02095		2.45508	1.51197		1.63173	1.90119			2.23053	2.27544		3.11376	5.6886		1.7964	2.35029
		1.25748	2.15568		1.88622	1.66167		1.99101	1.70658			2.51496	2.76945		3.2934	2.8443		2.38023	2.44011
		1.45209	1.60179		2.51496	2.02095		1.70658	1.9461			2.20059	2.11077		2.93412	2.38023		2.08083	3.08382
		0.65868	2.03592		1.7964	2.05089		1.75149	1.61676			2.51496	1.12275		3.50298	3.4431		2.78442	2.63472
		1.37724	1.91616		2.05089	1.85628		1.75149	1.85628			2.30538	1.60179		3.57783	3.75747		2.03592	2.61975
		1.40718	1.52694		1.67664	1.58682		1.54191	1.75149			2.14071	2.0958		3.38322	2.55987		3.4431	2.0958
		1.28742	1.75149		0.71856	1.60179		1.91616	1.73652			2.32035	1.66167		2.70957	3.30837		2.14071	2.32035
		1.42215	1.24251		1.00299	2.49999		1.66167	2.00598			2.29041			2.47005	2.5449		1.75149	2.48502
		1.75149	2.27544		0.64371	2.06586		1.42215	2.5449			2.45508			2.64969	3.95208		1.43712	2.52993
		1.70658	1.76646		1.12275	1.9461		1.10778	1.48203			2.21556			2.64969	3.7425		1.63173	2.75448
		1.6467	2.08083		0.7485	2.20059		1.22754	1.90119			2.41017			2.93412	3.27843		1.85628	2.8443
		2.03592	1.88622		0.97305	2.27544		1.21257	1.84131			2.20059			2.49999	2.85927		1.497	2.5449
		1.66167	1.96107		1.24251	1.91616		0.67365	1.39221			2.06586			2.6946	2.21556		2.05089	1.70658
		1.69161	1.46706		0.92814	2.02095		1.24251	1.76646			1.93113			2.58981	1.93113		1.66167	1.88622
		1.42215	1.51197		1.21257	1.58682		1.36227	1.6467			2.00598			2.72454	2.38023		1.97604	1.90119
		1.3473	2.02095		1.28742	2.11077		1.45209	1.85628			2.17065			2.30538	5.41914		1.75149	1.66167
		1.36227	1.91616		1.21257	2.44011		1.24251	2.06586			2.17065			2.96406	5.44908		1.1976	2.21556
		1.18263	1.84131		0.97305	1.9461		1.22754	1.90119			1.82634			2.35029	3.05388		2.05089	3.5928
		1.13772	1.40718		0.76347	2.12574		1.28742	2.33532			2.32035			2.73951	3.03891		1.9461	2.47005
		0.8982	1.70658		0.62874	2.18562		1.06287	1.57185			2.36526			2.94909	3.36825		1.52694	2.64969
		1.497	2.08083		1.13772	1.69161		1.51197	2.2455			1.73652			2.60478	5.05986		1.90119	2.51496
		1.25748	1.55688		1.31736	2.52993		1.40718	1.99101			1.85628			3.00897	3.5928		1.73652
		1.22754			1.36227			1.27245				2.17065			2.33532	2.60478		1.85628
		1.10778			1.51197			1.03293				2.12574			2.76945	3.42813		1.31736
		1.45209			0.85329			0.70359				2.2455			2.52993	4.37124		1.55688
		1.25748			1.15269			1.16766				1.76646			3.02394	4.0419		1.9461
		1.25748			1.15269			1.27245				1.81137			2.02095	2.72454		1.52694
		1.55688			1.76646			1.24251				2.05089			2.20059			1.90119
		1.3473			1.36227			1.42215				2.11077			2.52993			1.73652
		1.45209			1.46706			0.83832				2.32035			2.90418			1.85628
		1.31736			1.09281			1.25748				1.497			2.90418			1.31736
		0.85329			1.37724			1.21257				1.84131			2.45508			1.55688
		1.3473			0.94311			1.01796							2.93412			2.02095
		1.10778			1.39221			1.37724							3.03891			1.58682
		1.54191			1.25748			1.22754							2.90418			1.58682
					1.40718			1.09281							2.76945			1.69161
					1.42215			1.51197							2.35029			2.66466
					1.16766			1.36227							2.6946			1.99101
					1.09281			1.42215							2.72454			1.70658
					1.12275			1.25748							2.3952			2.20059
					1.76646			1.40718							2.36526			1.87125
					1.33233			1.16766							2.48502			1.73652
								1.58682							2.76945			1.69161
								1.497							2.58981			2.06586
								1.24251							2.57484			1.9461
								1.54191							2.57484			1.39221
								1.16766							2.67963			1.67664
								1.28742							2.90418			1.57185
								1.52694							3.03891			1.9461
								1.45209							2.72454			2.15568
								1.43712							2.57484			1.30239
								1.31736							2.3952			1.54191
								1.25748										2.02095
								1.12275
								1.15269
								1.31736
								1.27245
								1.06287
	Average	1.3798	1.79693		1.36788	1.93541		1.33888	1.89424			2.19074	2.2075		2.76868	3.39638		1.8474
	um	WT 10%			WT 50%			WT 90%			um	KO 10%			KO 50%			KO 90%
	Wild type 2	HC	SC		HC	SC		HC	SC		Cilk1 KO 2	HC	SC		HC	SC		HC	SC
		1.91616	1.76646		1.88622	2.23053		1.6467	1.3473		0	3.48801	5.34429		3.03891	2.44011		3.4431	2.8443
		2.14071	1.18263		1.21257	2.18562		1.76646	1.18263			2.85927	3.7425		2.94909	2.64969		3.7425	2.90418
		1.85628	1.81137		1.55688	2.3952		1.42215	1.27245			3.42813	3.24849		3.02394	1.91616		3.7425	2.06586
		2.27544	2.08083		1.60179	1.52694		1.24251	1.55688			2.93412	3.77244		2.55987	3.15867		1.99101	2.05089
		1.91616	1.45209		1.73652	2.06586		1.85628	1.01796			3.27843	2.52993		5.05986	3.32334		2.30538	2.81436
		2.35029	1.91616		1.58682	1.45209		2.12574	1.01796			2.70957	2.60478		3.4431	3.03891		2.17065	2.72454
		2.5449	2.2455		1.21257	1.51197		1.87125	1.37724			2.82933	3.18861		3.80238	1.93113		2.15568	2.18562
		1.99101	1.52694		1.82634	1.52694		1.84131	1.31736			2.67963	2.72454		3.08382	4.13172		2.26047	2.30538
		2.23053	2.18562		1.58682	2.21556		1.91616	2.06586			2.93412	2.66466		3.7425	2.55987		1.33233	3.1437
		2.17065	2.51496		2.03592	1.57185		1.37724	1.54191			1.88622	3.03891		3.48801	3.96705		2.26047	4.17663
		2.06586	2.41017		1.73652	1.66167		1.33233	1.497			2.0958	3.02394		3.05388	2.17065		1.96107	2.64969
		2.33532	1.93113		1.6467			1.40718	1.6467			1.1976	3.2934		2.994	1.75149		5.35926	3.20358
		1.70658	2.17065		2.45508			1.27245	1.72155			0.68862	3.69759		1.88622	2.3952		2.82933	2.35029
		1.9461	2.41017		1.87125			1.39221	1.67664			1.01796	2.70957		2.44011	2.67963		1.55688	2.58981
		1.97604	2.58981		1.67664			1.3473	1.70658			2.08083	1.84131		1.76646	1.88622		1.25748	2.29041
		1.87125	1.70658		1.76646			1.63173	1.88622			1.69161	2.76945		1.46706	1.54191		1.45209	2.0958
		1.75149	1.31736		2.02095			1.52694	2.11077			1.76646	1.85628		1.57185	2.21556		1.28742	2.61975
		2.29041	1.73652		1.39221			1.57185	2.0958			1.91616	1.85628		1.45209	1.91616		2.35029	2.52993
		2.11077	1.91616		1.70658			1.24251	2.03592			1.497	2.97903		1.84131	1.90119		1.13772	3.33831
		1.96107	1.58682		1.97604			1.40718	2.3952			1.60179	2.21556		1.27245	3.15867		1.22754	2.70957
		2.06586	1.67664		1.39221			1.1976	2.5449			1.27245			2.45508	2.45508		0.91317	3.62274
		1.76646	2.36526		0.97305			1.30239	2.75448			1.46706			1.93113	1.87125		1.00299
		1.37724	1.78143		1.52694			1.46706	2.08083			2.67963			1.60179			1.18263
		1.42215	1.99101		1.54191			1.3473	1.96107			1.25748			1.60179			1.61676
		1.45209	1.52694		1.25748			1.33233	1.75149			1.87125			2.994			1.46706
		1.30239	1.61676		1.84131			1.15269	2.00598			1.54191			1.78143			0.95808
		1.45209	1.84131		0.95808			1.30239	1.58682			3.32334			2.27544			1.497
		1.66167	2.38023					1.33233	2.81436			3.35328			2.17065			1.497
		1.48203	1.7964					1.30239	1.72155			2.47005			1.70658			1.1976
		1.40718	2.36526					1.18263	1.18263			1.90119			2.00598			1.40718
		2.14071	1.9461					1.45209	1.97604			1.66167			1.82634			1.3473
		1.90119	1.63173					1.36227	1.84131			0.86826			1.18263			1.69161
		1.51197	2.03592					1.25748				1.63173			2.51496			1.60179
		1.63173	1.90119					1.3473				1.10778			1.45209			1.45209
		1.37724						1.28742				0.97305			2.57484			1.45209
		1.45209						1.25748				1.69161			1.82634			1.69161
		1.46706						0.70359				1.69161			1.45209			1.66167
		0.97305						1.1976				1.66167			1.7964			1.70658
		1.61676						1.18263				1.58682			1.25748			1.69161
		1.54191						1.22754				1.78143			1.00299			1.16766
		1.66167						1.3473				1.73652			1.27245			1.1976
		1.37724						1.3473				0.97305			1.7964			1.46706
		1.6467						1.39221							1.61676			1.52694
		1.55688						1.40718							2.29041			1.21257
		1.69161						1.3473							1.48203			1.497
		1.48203						1.28742							2.35029			1.497
		1.63173						1.12275										1.25748
																		1.33233
																		1.07784
																		1.72155
																		1.37724
	Average	1.7757	1.921		1.62896	1.84948		1.39667	1.77161			1.97818	2.95508		2.22077	2.50271		1.74885	2.72454
	um	WT 10%			WT 50%			WT 90%			um	KO 10%			KO 50%			KO 90%
	Wild type 3	HC	SC		HC	SC		HC	SC		Cilk1 KO 3	HC	SC		HC	SC		HC	SC
		1.96107	1.76646		2.05089	2.11077		1.1976	1.77095			3.17364	4.95507		3.50298	3.53292		2.58981	4.68561
		1.85628	1.67664		1.39221	1.24251		1.55688	1.8488			2.42514	4.02693		2.38023	3.09879		2.17065	2.49999
		1.3473	1.7964		2.3952	1.82634		1.52694	1.82933			2.94909	3.53292		2.75448	2.60478		1.75149	4.55088
		1.69161	1.67664		2.47005	1.99101		2.03592	1.75149			3.38322	3.00897		3.09879	3.00897		2.90418	2.88921
		1.69161	1.90119		2.42514	1.99101		1.85628	1.90718			3.32334	3.45807		3.32334	2.8443		3.09879	1.33233
		1.66167	1.82634		2.27544	1.70658		2.2455	1.92664			3.41316	5.49399		3.08382	3.06885		2.14071	3.00897
		1.7964	1.42215		1.43712	2.11077		1.76646	2.02394			3.35328	6.09279		3.45807	3.32334		2.17065	3.20358
		1.54191	1.67664		1.99101	1.48203		2.33532	1.67365			3.18861	3.62274		3.11376	2.6946		2.73951	1.36227
		1.96107	2.2455		1.18263	1.42215		1.43712	2.00448			3.00897	3.02394		3.47304	2.78442		1.67664	2.94909
		1.7964	1.51197		1.91616	1.55688		1.40718	1.96556			2.57484	3.81735		3.2934	3.57783		3.00897	2.85927
		1.93113	1.24251		1.48203	1.91616		1.73652	2.2964			2.73951	3.83232		2.72454	3.32334		1.36227	1.88622
		1.63173	1.54191		1.54191	1.52694		3.02394	2.72454			2.08083	3.18861		2.35029	4.0419		1.81137	3.06885
		2.15568	1.6467		2.20059	1.81137		1.43712	2.14071			2.45508	3.05388		2.76945	5.62872		1.01796	3.20358
		2.29041	2.49999		1.87125	2.21556		1.28742	1.80987			2.70957	2.35029		3.09879	4.74549		1.48203	4.07184
		2.11077	2.18562		1.30239	1.96107		1.43712	1.86826			2.51496	2.42514		2.21556	2.47005		1.10778	3.42813
		2.32035	2.2455		1.33233	1.70658		1.22754	1.92664			2.27544	2.78442		2.78442			1.39221	3.39819
		2.12574	1.57185		1.52694	2.26047		1.01796	1.8488			2.2455	4.01196		2.52993			1.22754	6.16764
		2.12574	1.90119		1.40718	1.57185		0.95808	1.67365			2.49999	3.56286		3.12873			1.25748	2.96406
		1.96107	2.08083		1.61676	1.24251		1.13772	1.82933			2.5449	2.87424		2.11077			1.70658	3.71256
		2.21556	1.46706		2.2455	1.72155		1.01796	2.21855			2.72454	3.05388		2.47005			1.84131	3.03891
		2.05089			1.85628	1.67664		1.61676	1.51796			1.93113			2.11077			1.6467	5.26944
		1.7964			1.82634	1.97604		1.1976	1.71257			2.21556			1.52694			2.00598	2.93412
		2.18562			1.27245	1.51197		1.01796	2.02394			2.18562			1.67664			1.90119	2.41017
		1.73652			1.93113	2.02095		1.6467	1.96556			2.72454			2.70957			2.2455	4.491
		1.88622			1.37724	2.05089		1.40718				2.0958			2.52993			1.39221	2.76945
		2.02095			1.1976	1.6467		0.7485				2.3952			1.27245			1.24251	4.491
		1.28742			1.87125	1.52694		1.16766				2.55987			1.16766			1.00299
		1.93113			1.6467	1.7964		1.37724				1.91616			2.06586			1.36227
		1.81137			1.36227			1.25748				2.23053			2.00598			1.31736
		1.42215			0.92814			1.10778				2.08083			2.20059			2.12574
		1.72155			1.85628			0.86826				2.47005			2.36526			1.16766
		1.21257			1.91616			1.22754				2.05089			2.18562			1.76646
		1.27245			1.46706			1.31736				2.42514			1.87125			1.54191
		1.97604			2.05089			1.497				2.42514			1.96107			2.11077
		1.30239			1.22754			1.43712				2.97903			1.48203			1.13772
		1.60179			1.15269			1.22754				2.17065			2.52993			1.99101
					1.63173			1.28742				2.55987			2.30538			1.497
					1.16766			0.95808				3.63771			2.20059			1.37724
					1.67664			0.98802				1.9461			4.67064			1.78143
					0.85329			1.10778				1.43712			3.38322			1.6467
					1.67664			1.3473				2.26047			2.70957			1.00299
					1.16766			1.16766				2.03592			2.06586			1.84131
					1.43712			1.0479				1.39221			1.76646			1.9461
					1.82634			1.22754							3.32334
					1.7964			1.01796
					1.18263			1.1976
					1.58682			1.10778
					1.27245			0.80838
					1.7964			1.35478
					0.86826
	Average	1.81636	1.79415		1.61886	1.77074		1.35478	1.92745			2.50486	3.60852		2.5398	3.38322		1.75602	3.33255

## Sheet: Tbc1d32_bromi cilia length
		um	WT10%			WT50%			WT90%			um	MT10%			MT50%			MT90%
		wild type 1	HC			HC			HC				Tbc1d32bromi 1	HC			HC			HC
			2.27164			1.23499			1.36144					2.6676			2.6676			2.65049
			1.60269			1.54616			1.1135					2.9029			2.9029			2.54586
			1.7036			1.90072			1.29351					2.11791			2.11791			2.44296
			1.53128			1.54616			1.23971					2.64925			2.64925			3.28175
			1.66319			1.60963			1.10879					2.17643			2.17643			2.04204
			2.05816			2.28527			1.17202					2.6676			2.6676			2.28081
			1.97436			1.95725			1.1135					2.23147			2.23147			2.34404
			1.66319			1.60468			1.12615					2.34404			2.34404			2.09609
			2.32569			2.16378			1.05028					3.09232			3.09232			2.23147
			2.16378			1.92849			1.17202					2.48288			2.48288			2.52875
			1.89749			1.6679			0.929036					2.3485			2.66462			2.13056
			1.80675			1.23499			1.29351					2.54586			2.2394			1.85262
			1.68724			1.60939			1.17202					2.20742			2.40255			2.48735
			1.67013			1.48294			0.991765					2.2223			2.40701			1.78939
			1.65773			1.48765			1.41996					2.10056			2.3485			2.09609
			1.23971			1.47847			1.17202					2.11791			2.07328			2.10056
			1.64955			1.23971			0.987054					2.02741			2.21188			1.6679
			1.41996			1.29351			1.23971					1.98353			1.7941			1.33839
			1.68501			1.23499			0.991765					2.04204			2.34676			1.29822
			1.62203			1.72641			1.41996					2.23147			2.10527			1.73088
			1.6679			1.41996			1.23499					2.54586			1.91113			1.49558
			1.29351			1.23499			0.802338					2.20742			2.5104			1.68055
			1.36145			1.65749			1.10879					2.2223			2.23147			1.72641
			1.45566			1.29822			1.05028					2.10056			1.98353			1.73088
			1.59129			1.54145			1.10879					2.11791			1.91584			1.66319
			1.98353			1.36144			1.17202					2.02741			2.21759			1.6679
			1.6679			1.60468			1.17202					1.98353			2.04204			1.64559
			1.91113			1.84815			0.865563					2.04204			2.60115			1.60468
			1.73559			1.2521			1.1135					2.23147			2.55057			1.49558
			1.62203			1.27987			0.924077					2.4747			2.41668			1.99146
			1.235			1.54145			0.987054					1.85733			2.58727			1.55112
			1.60468			1.05028			0.991765					1.73559			2.57685			1.34632
			1.66319			1.50352			0.964491					1.6679			2.28998			1.70807
			1.54616			1.10879			1.17202					2.49429			1.97436			1.58707
			1.64063			1.29351			1.10879					1.98353			1.97882			1.59426
			2.03733			1.45566			1.05028					1.73559			1.91113			1.58211
			1.66319			1.49558			1.05028					1.6679			2.28998			1.70831
			1.84815			1.43682			0.991765					2.28998			1.7941			1.46037
			1.65278			1.17202			1.23971					1.91584			2.23147			1.48294
			1.48765			1.47847			1.17202					2.20742			2.10527			1.47847
		Aveage	1.69905			1.50669			1.11621					2.2167			2.30114			1.87843
		um	WT10%			WT50%			WT90%				um	MT10%			MT50%			MT90%
		wild type 2	HC			HC			HC				Tbc1d32bromi 2	HC			HC			HC
			1.37479			1.37924			0.932217					2.21381			2.76153			2.91186
			1.26403			1.2261			1.40055					1.96981			2.50746			2.84255
			1.82556			1.41905			0.888897					2.39693			2.333			2.1075
			1.79957			1.45581			0.932217					2.30162			2.66903			2.84255
			1.73236			1.2261			0.872739					1.91993			2.77558			2.89922
			1.57524			1.6305			0.932217					2.45992			2.43065			1.57079
			1.86888			1.68998			1.02588					2.38452			2.6311			3.5406
			1.51998			1.68998			0.52828					2.38827			2.60955			2.73226
			1.97964			1.51998			0.7025					2.27329			2.22248			2.68636
			1.6305			1.34107			0.817476					2.34495			2.27774			2.72757
			1.05164			0.936667			1.02588					2.21803			1.97964			1.63917
			1.405			0.7025			1.16638					2.08479			2.92053			1.63917
			1.16638			1.22165			0.851196					1.91455			2.16276			1.84734
			2.163			1.22165			0.7025					2.43814			2.16276			2.37422
			1.34107			1.28136			1.22165					2.21803			1.69443			1.94522
			2.17471			0.99193			0.817476					1.92415			1.96653			1.6305
			1.80496			1.57524			1.04719					2.31591			1.61224			1.86888
			1.86467			0.99193			0.872739					1.87333			1.57524			2.04357
			1.68998			0.888897			0.7025					1.98831			1.51365			1.6771
			1.45581			1.04719			1.14461					2.45664			1.76164			1.5914
			1.54948			1.92415			0.99193					2.1541			1.68811			1.51553
			1.6305			0.872739			1.04719					2.30162			1.39634			2.43838
			1.8841			1.05164			0.872739					1.87333			1.74548			2.54984
			1.68998			1.46026			1.04719					2.27329			1.64666			1.98386
			1.68998			1.2261			1.04719					1.80496			1.57524			1.97964
			1.17083			0.936667			0.769706					1.74033			1.37479			1.82135
			1.14508			0.851196			0.99193					1.51998			2.45219			1.63917
			1.58718			1.2261			0.99193					2.089			1.6305			1.2261
			1.63472			1.2261			0.936667					2.05552			1.97964			1.9403
			1.98386			1.6305			0.757763					1.9286			1.74548			1.39118
			1.63917			1.405			0.99193					1.86467			1.69443			1.9403
			2.16276			1.51553			1.22633					2.05552			1.86888			1.39118
			2.16276			1.5914			0.936667					1.80496			2.17026			2.11499
			2.27329			1.68998			0.7025					1.92415			2.31122			2.52385
			1.69443			1.79208			0.932217					2.09439			1.74969			2.03374
			1.87333			1.34107			1.05164					1.74548			1.70637			2.73741
			2.03912			0.740435			0.757763					1.97847			2.08479			2.1541
			1.91993			0.932217			1.04719					1.80496			1.91993			1.97964
			1.74993			1.40055			0.7025					2.1075			1.98386			2.09884
			1.61247			1.39634			0.936667					1.69443			1.86888			2.43814
		Aveage	1.69452			1.29117			0.933119					2.0725			2.02901			2.12538
		um	WT10%			WT50%			WT90%				um	MT10%			MT50%			MT90%
		wild type 3	HC			HC			HC				Tbc1d32bromi 3	HC			HC			HC
			2.19371			2.15544			1.61885					3.45102			2.36333			3.29635
			1.68673			2.15368			1.02626					3.33403			3.04624			3.46847
			2.02217			1.68937			1.38604					3.82399			1.7939			3.49955
			1.79596			1.95635			1.45788					2.90285			2.56946			3.30823
			1.60727			1.27667			1.16129					3.05635			2.79861			2.86122
			1.80153			1.94257			1.46609					3.3179			2.98979			4.19462
			1.9669			2.67561			1.17287					2.75859			3.22261			3.13435
			2.1984			2.15368			1.21495					2.94859			2.66535			3.04008
			1.78848			2.32668			1.35408					2.59644			2.95065			3.32245
			1.8977			2.51082			1.04737					3.07057			2.67561			2.83233
			1.64202			1.88891			1.60727					2.9549			3.09638			3.07057
			1.27945			1.95356			1.4979					3.2314			2.66212			3.10796
			1.57267			1.85152			1.85225					2.77369			2.26569			2.88673
			2.22552			1.85152			1.90049					3.53972			2.90784			2.43869
			2.04431			1.99813			1.23943					2.75698			2.98246			2.41391
			1.57267			1.68952			1.07039					3.36863			2.81151			3.11089
			1.27667			1.88099			2.40145					3.65759			3.22451			3.55218
			1.60727			1.77235			2.18755					3.04755			2.31803			2.81797
			1.02084			1.78569			1.46066					2.98451			2.91751			2.462
			1.16745			1.67031			1.85225					3.09095			2.41465			2.57049
			1.05001			1.56109			2.11014					3.07556			3.14226			2.98979
			1.71649			2.04167			2.00707					3.04022			2.652			2.70816
			1.99886			1.64935			2.27581					2.90974			2.74364			3.45615
			1.93773			2.11351			2.15632					3.04755			2.77134			2.46992
			1.40085			1.71386			1.245					2.97821			2.51331			2.64101
			1.8285			1.7423			1.10778					2.8404			3.10253			3.65613
			1.6473			1.89917			1.52546					2.8228			2.98173			2.51038
			1.13285			1.74846			1.09282					3.36614			3.99201			2.13873
			1.51022			1.84551			1.17741					3.28887			2.79539			2.31319
			1.38604			2.16277			1.09429					2.4771			2.64306			2.56961
			2.00971			2.11351			1.77426					3.68677			3.30133			2.14503
			1.57267			1.78569			1.78305					3.11631			3.4585			2.64101
			1.44717			1.99608			1.71386					3.35499			3.44457			2.65934
			1.46066			2.02818			1.47078					2.9417			3.08582			2.56345
			2.00707			1.59364			0.733043					3.09198			2.29472			2.87192
			1.9323			1.6124			1.17287					2.94786			2.85682			3.2248
			2.0817			1.89301			0.879652					3.11763			2.27038			2.63353
			1.20468			1.84111			0.948851					3.10253			2.08463			2.35043
			1.68189			1.89506			1.02626					3.07878			3.41364			2.74891
			2.11586			1.77968			0.948851					3.12291			3.19196			2.42256
		Aveage	1.68726			1.90499			1.45547					3.10186			2.8354			2.87758

## Sheet: Cilia lengths_all
		HC			Average		Average	HC	SC		STDEV	HC	SC
	WT	1.36219	1.60044	1.59667	1.51976		WT	1.49813	1.85122		WT	0.150194	0.392487
	Ick	2.26894	1.9826	2.26689	2.17281		Tbc1d32bromi	2.382			Tbc1d32bromi	0.482578
							Cilk1 KO	2.17281	2.99027		Cilk1 KO	0.164731	0.392487
		SC			Average
	WT	1.87553	1.84736	1.83078	1.85122
	Cilk1 KO	2.80194	2.72744	3.44143	2.99027
		HC			Average
	WT	1.44065	1.30627	1.68257	1.4765
	Tbc1d32bromi	2.13209	2.07563	2.93828	2.382			WT HC	Tbc1d32bromi HC	Cilk1 KO HC	WT SC	Cilk1 KO SC
							Average	1.49813	2.382	2.17281	1.85122	2.99027
							STDEV	0.150194	0.482578	0.164731	0.392487	0.392487

## Sheet: cochlear length
	Bromi cochlear length
	control (um)				mutant
	B126C	6199.63			B127A	2981.73
	B126E	5801.08			B127B	3276.95
	B135C	5136.83			B135B	2996.49
	B135D	5254.92			B44A LE	3350.75
	B138B	5269.68			B138A LE	3020.1
	B138C	5373.01
	B44C	6140.58
	average	5596.53			average	3125.2
	SDV	444.666			SDV	174.712
	Ick cochlear length
	control (um)				mutant
	Ick268	5901.8			Ick268A	5071.62
	Ick266C	5473.3			Ick268B	5036.48
	Ick164C	5544.24			Ick266A	4634.8
	Ick57C	5466.79			Ick164B	4104.65
					Ick57B	4748.14
	average	5596.53			average	4719.14
	SDV	206.509			SDV	343.506
	PFT cochlear length
	control (um)				mutant
	PFT413C	5521.08			PFT415A LE	3342.42
	PFT413A	5671.99			PFT413E LE	3443.71
	PFT25G	5519.01			PFT25B LE	3536.2
	PFT25F	5840.86			PFT25B RE	3366.8
	PFT143F	5844.25			PFT143D	3752.18
	average	5679.44			average	3488.26
	SDV	186.806			SDV	193.16
			(um)
			WT	Ift88 cKO	bromi KO	Ick KO
		Averaged cochlear length	5622.44	3488.26	3125.2	4719.14
		SDV	310.056	193.16	174.712	343.506
		%	1	0.614191	0.558417	0.843225
		t-test		5.85662e-06	1.90101e-07	0.00250744
			(mm)
			WT	Ift88 cKO	bromi KO	Ick KO
			5.62244	3.48826	3.1252	4.71914
			0.310056	0.19316	0.174712	0.343506

## Sheet: HC number
	Control			Bromi
	B44C	2193		B44A LE	1329	0.559167
	B58C	2550		B135A	1424	0.599137
	B138B	2620		B135B	1382	0.581466
	B138C	2144		B126B	1473	0.619754
				B126A	1364	0.573893
	Control			Ick
	Ick356D	2485		Ick268A	2207	0.871643
	Ick268C	2579		Ick268B	2194	0.866509
				Ick356A	2125	0.839258
	Control			PFT cKO
	PFT233B	2248		PFT192A LE	1554	0.57791
	PFT192D	2689		PFT192A RE	1623	0.60357
				PFT413E LE	1807	0.732023
				PFT413E RE	1908	0.772939
				PFT415A	1502	0.608467
			WT	Ift88 cKO	Bromi KO	Ick KO
		Averaged hair cell number	2438.5	1678.8	1394.4	2175.33
		SDV	211.565	172.42	55.6983	44.0719
		%	1	0.688456	0.571827	0.892078
