# Supplementary material for: Dysregulation of sonic hedgehog signaling causes hearing loss in ciliopathy mouse models
Source: eLife. 2020 Dec 31;9:e56551. doi: 10.7554/eLife.56551 (PMC7806262; doi:10.7554/eLife.56551)
Supplement: Figure 3—figure supplement 1—source data 1. [file elife-56551-fig3-figsupp1-data1.xlsx]

## Sheet: Ift88 in situ intensity data
Duct #	1	2	3	4	5	6	7	8	9	10	11	12	13	14	15	16	17	18	19	20	21	22	23	24	25	26	27	28	29	30	31	32	33	34	35	36	37	38		Min
Atoh1-Ctrl	12212	-210	39838	50274	39357	102165	92874	117977								97681	95127	82563	83916	68897	65080	36243					19957	1930	4117	1595	1377	2279	1538	2550	1383	218	4872	363		19957
Atoh1-cKO	27950	25786	64882	87552	115085	109444	110960							126868	124545	128595	130830	142524				141121	112935	122397	127835	115140
Sox2-Ctrl	228278	127745	108385	134075	158844	135437	189582	267280	258752							246266	247829	228261	253552	257862	173863	144832	153657	182655	210471	127754	173339	172315	183457	171471	147500	224483	182020	185041	183530	188062	160120	86451		62451
Sox2-cKO	243015	248926	181212	184767	213418	227992	250262	241183	263515	263277	191309	277816	267538	324611		290383	200082	200181	175891	240584	198767
Ptch1-Ctrl	343275	354590	389782	346747	422329	354177	408448	359726	330144					444097	465102	327680	339688	463928	517529	566952	498501	543721		668972	617494	704673	854166	805414	855652	769474	815152	814440			773905	705930	749629			327680
Ptch1-cKO	374178	380367	397117	321577	377910	252576	386627						313504		412917	313554	396746	430727	361298					481575	439302	203270	278368	304863	200550
Gli1-Ctrl	155956	139778	163324	127950	92575	109803								152946	201193	222849	271870	331621	344568	274792	254716	374639	428487	403757	408969	448160	460585	528515	488290	487936	494753	487229			465705	386727	367834			92575
Gli1-cKO	130607	132488		166619	157073	133858	84493				175425	263465	212479	280347		262410	230073	335937				355629	299576	248589		252869	139959	209666	163584
minus Min																																								Max of minus min
Atoh1-Ctrl	-7745	-20167	19881	30317	19400	82208	72917	98020								77724	75170	62606	63959	48940	45123	16286					0	-18027	-15840	-18362	-18580	-17678	-18419	-17407	-18574	-19739	-15085	-19594		98020
Atoh1-cKO	7993	5829	44925	67595	95128	89486.5	91003							106911	104588	108638	110873	122567				121164	92978	102440	107878	95183
Sox2-Ctrl	165827	65294	45934	71624	96393	72986	127131	204829	196302							183815	185378	165810	191101	195411	111412	82381	91206	120204			110888	109864	121006	109020	85049	162032	119569	122590	121080	125611	97669			204829
Sox2-cKO	180564	186475	118761	122316	150967	165541	187811	178732	201064	200826	128858	215365	205087	262160		227932	137631	137730	113440	178133	136316
Ptch1-Ctrl	15595	26910	62102.5	19067	94649	26497	80768	32046	2464					116417	137422	0	12008	136248	189849	239272	170821	216041		341292	289814	376993	526486	477734	527972	441794	487472	486760			446225	378250	421949			527972
Ptch1-cKO	46498.2	52687.3	69437	-6103.22	50230.1	-75103.7	58946.9						-14176.3		85236.8	-14126	69066.2	103047	33618.3					153895	111622	-124410	-49312.4	-22817	-127130
Gli1-Ctrl	63381	47203	70749	35374.5	0	17228								60371	108618	130274	179295	239046	251993	182217	162141	282064	335912	311182	316394	355585	368010	435940	395715	395361	402178	394654	-92575	-92575	373130	294152	275259			435940
Gli1-cKO	38032	39913			64498	41283	-8082				82850	170890	119904	187772		169835	137498	243362				263054	207001	156014		160294	47384	117091	71009
% value
minus Min	1	2	3	4	5	6	7	8	9	10	11	12	13	14	15	16	17	18	19	20	21	22	23	24	25	26	27	28	29	30	31	32	33	34	35	36	37	38
Atoh1-Ctrl	-0.0790145	-0.205744	0.202826	0.309294	0.197919	0.838686	0.743899	1								0.79294	0.766884	0.638706	0.65251	0.499286	0.460345	0.16615					0	-0.183911	-0.1616	-0.187329	-0.189553	-0.180351	-0.187911	-0.177586	-0.189492	-0.201377	-0.153897	-0.199898
Atoh1-cKO	0.0815446	0.0594675	0.458325	0.689604	0.970496	0.912941	0.928413							1.09071	1.06701	1.10832	1.13113	1.25043				1.23612	0.948562	1.04509	1.10057	0.971057
Sox2-Ctrl	0.809588	0.318773	0.224255	0.349677	0.470602	0.356326	0.620669	1	0.958368							0.897407	0.905038	0.809505	0.932978	0.95402	0.543927	0.402194	0.445279	0.58685			0.541369	0.536369	0.590766	0.532249	0.41522	0.79106	0.58375	0.598499	0.591125	0.613248	0.476832
Sox2-cKO	0.881537	0.910394	0.579806	0.597163	0.737039	0.808191	0.916916	0.87259	0.981617	0.980458	0.629102	1.05144	1.00126	1.2799		1.11279	0.671931	0.672416	0.553826	0.869667	0.665513
Ptch1-Ctrl	0.0295376	0.0509686	0.117625	0.0361137	0.179269	0.0501864	0.152978	0.0606964	0.00466691						0.260283	0	0.0227436	0.258059	0.359582	0.453191	0.323542	0.40919		0.646421	0.548919	0.71404	0.997185	0.904848	1	0.836775	0.923291	0.921943			0.845168	0.716421	0.799188
Ptch1-cKO	0.0880694	0.0997919	0.131516	-0.0115597	0.0951377	-0.142249	0.111648						-0.0268505		0.161442	-0.0267552	0.130814	0.195175	0.0636745					0.291484	0.211416	-0.235637	-0.0933996	-0.0432162	-0.24079
Gli1-Ctrl	0.145389	0.108279	0.162291	0.0811453	0	0.0395192								0.138485	0.249158	0.298835	0.411284	0.548346	0.578045	0.417986	0.371934	0.647025	0.770546	0.713818	0.725774	0.815674	0.844176	1	0.907728	0.906916	0.922554	0.905294	-0.212357	-0.212357	0.855921	0.674753	0.631415
Gli1-cKO	0.0872414	0.0915562			0.147952	0.0946988	-0.0185392				0.190049	0.392003	0.275047	0.430729		0.389583	0.315406	0.558247				0.603418	0.474838	0.35788		0.367697	0.108694	0.268594	0.162887

## Sheet: Ptch1 
Ift88 cKO
		1		2		3		4		5		6		7		8		9		10		11		12		13		14		15		16		17		18		19		20		21		22		23		24
Ptch1-Ctrl		0.0295376		0.0509686		0.117625		0.0361137		0.179269		0.0501864		0.152978		0.0606964		0.00466691												0.260283		0		0.0227436		0.258059		0.359582		0.453191		0.323542		0.40919				0.646421
Ptch1-cKO		0.0880694		0.0997919		0.131516		-0.0115597		0.0951377				0.111648												-0.0268505				0.161442		-0.0267552		0.130814		0.195175		0.0636745										0.291484
[truncated: 13 more columns]

## Sheet: Gli1
Ift88 cKO
		1		2		3		4		5		6		7		8		9		10		11		12		13		14		15		16		17		18		19		20		21		22		23		24
Gli1-Ctrl		0.145389		0.108279		0.162291		0.0811453		0		0.0395192																0.138485		0.249158		0.298835		0.411284		0.548346		0.578045		0.417986		0.371934		0.647025		0.770546		0.713818
Gli1-cKO		0.0872414		0.0915562						0.147952		0.0946988		-0.0185392								0.190049		0.392003		0.275047		0.430729				0.389583		0.315406														0.35788
[truncated: 18 more columns]

## Sheet: Atoh1
Ick cKO
		1		2		3		4		5		6		7		8		9		10		11		12		13		14		15		16		17		18		19		20		21		22		23		24
Atoh1-Ctrl		-0.0790145		-0.205744		0.202826		0.309294		0.197919		0.838686		0.743899		1																0.79294		0.766884		0.638706		0.65251		0.499286		0.460345		0.16615
Atoh1-cKO		0.0815446		0.0594675		0.458325		0.689604		0.970496		0.912941		0.928413														1.09071		1.06701		1.10832		1.13113		1.25043								1.23612		0.948562		1.04509
																																						0.65251	0.499286	0.460345	0.16615					0	-0.183911	-0.1616	-0.187329
																																									1.23612	0.948562	1.04509	1.10057	0.971057
[truncated: 14 more columns]

## Sheet: Sox2
Ick cKO
		1		2		3		4		5		6		7		8		9		10		11		12		13		14		15		16		17		18		19		20		21		22		23		24
Sox2-Ctrl		0.809588		0.318773		0.224255		0.349677		0.470602		0.356326		0.620669		1		0.958368														0.897407		0.905038		0.809505		0.932978		0.95402		0.543927		0.402194		0.445279		0.58685
Sox2-cKO		0.881537		0.910394		0.579806		0.597163		0.737039		0.808191		0.916916		0.87259		0.981617		0.980458				1.05144		1.00126		1.2799				1.11279		0.671931		0.672416		0.553826		0.869667		0.665513
[truncated: 13 more columns]
