# Supplementary material for: Dysregulation of sonic hedgehog signaling causes hearing loss in ciliopathy mouse models
Source: eLife. 2020 Dec 31;9:e56551. doi: 10.7554/eLife.56551 (PMC7806262; doi:10.7554/eLife.56551)
Supplement: Figure 3—figure supplement 1—source data 2. [file elife-56551-fig3-figsupp1-data2.xlsx]

## Sheet: Bromi in situ intendisty data
Duct #	1	2	3	4	5	6	7	8	9	10	11	12	13	14	15	16	17	18	19	20	21	22	23	24	25	26	27	28	29	30	31		Min
Atoh1-Ctrl	26541	86171	79053	153411	142399	147917	142468					113387	104792	131438	134017	106734	100940	97222	89942	55192		55043	57803	10942	35309	15287	4762	2578	-1156	7254	3254		26541
Atoh1-bromi	8773	309	106186	115250	159513						193331	185377	190010	216535	112739
Sox2-Ctrl	440035	419681	321466	353303	366678	312711	398472					512557	452903	415267	418319	332803	432089	334157	341586	307321		273246	348861	214049	306706	304222	274408	249488	233942	188389	220054		85957
Sox2-bromi	297986	317673	263400	324741	408548						406374	407079	414273	303863	286057
Ptch1-Ctrl	337442	337337	349137	346120	334883	333070	418396					358714	357592	385829	368997	409976	451783	388794	399630	557755		505301	589628	676989	726512	717697	726162	869651	834459	732718			333070
Ptch1-bromi	336697	292549	248591	269421	347961						338971	312005	397308	307772	290798
Gli1-Ctrl	236621	171596	210405	189657	212702	141933	195999					238748	179923	259268	305982	267084	278611	321163	323294	279831		345392	392098	404393	408585	510993	510945	506940	409232	346398	347054		141933
Gli1-bromi	141136	164800	219172	178398	234304						249416	237580	234576	144544	95986
minus Min																																	Max of minus min
Atoh1-Ctrl	0	59630	52512	126870	115858	121376	115927					86846	78251	104897	107476	80192.5	74399	70681	63401	28651		28502	31262	-15599	8768	-11254	-21779	-23963	-27697	-19287	-23287		126870
Atoh1-bromi	-17768	-26232	79645	88709	132972						166790	158836	163469	189994	86198
Sox2-Ctrl	354078	333724	235509	267346	280721	226754	312515					426600	366946	329310	332362	246846	346132	248200	255629	221364		187289	262904	128092	220749	218265	188451	163531	147985	102432	134097		426600
Sox2-bromi	212029	231716	177443	238784	322591						320417	321122	328316	217906	200100
Ptch1-Ctrl	4372	4267	16067	13050	1813	0	85326					25644	24522	52759	35927	76906	118713	55724	66560	224685		172231	256558	343919	393442	384627	393092	536581	501389	399648			536581
Ptch1-bromi	3627	-40521	-84479	-63649	14891						5901	-21065	64238	-25298	-42272
Gli1-Ctrl	94688	29663	68472	47724	70769	0	54066					96815	37990	117335	164049	125151	136678	179230	181361	137898		203458	250165	262460	266652	369060	369012	365007	267300	204465	205121		369060
Gli1-bromi	-797	22867	77239	36465	92371						107483	95647.5	92643	2611	-45947
% value
minus Min	1	2	3	4	5	6	7	8	9	10	11	12	13	14	15	16	17	18	19	20	21	22	23	24	25	26	27	28	29	30	31
Atoh1-Ctrl	0	0.470009	0.413904	1	0.913202	0.956696	0.913746					0.684527	0.616781	0.826807	0.847135	0.632084	0.586419	0.557114	0.499732	0.22583		0.224655	0.24641	-0.122953	0.0691101	-0.088705	-0.171664	-0.188878	-0.21831	-0.152022	-0.18355
Atoh1-bromi	-0.140049	-0.206763	0.627769	0.699212	1.0481						1.31465	1.25196	1.28848	1.49755	0.67942
Sox2-Ctrl	0.83	0.782288	0.55206	0.62669	0.658043	0.531538	0.732571					1	0.860164	0.771941	0.779095	0.578636	0.811374	0.58181	0.599224	0.518903		0.439027	0.616278	0.300263	0.517461	0.511639	0.441751	0.383336	0.346894	0.240113	0.314339
Sox2-bromi	0.497021	0.543169	0.415947	0.559737	0.756191						0.751095	0.752747	0.769611	0.510797	0.469058
Ptch1-Ctrl	0.00814788	0.0079522	0.0299433	0.0243207	0.0033788	0	0.159018					0.0477915	0.0457005	0.0983244	0.0669554	0.143326	0.22124	0.10385	0.124045	0.418735		0.320979	0.478135	0.640945	0.733239	0.716811	0.732587	1	0.934414	0.744805
Ptch1-bromi	0.00675946	-0.075517	-0.157439	-0.11862	0.0277516						0.0109974	-0.0392578	0.119717	-0.0471467	-0.0787803
Gli1-Ctrl	0.256565	0.0803745	0.185531	0.129312	0.191755	0	0.146497					0.262329	0.102937	0.317929	0.444505	0.339107	0.370341	0.485639	0.491413	0.373647		0.551288	0.677844	0.711158	0.722517	1	0.99987	0.989018	0.724271	0.554016	0.555793
Gli1-bromi	-0.00215954	0.0619601	0.209286	0.0988051	0.250287						0.291234	0.259165	0.251024	0.00707473	-0.124497

## Sheet: Gli1
Tbc1d32_bromi
		1		2		3		4		5		6		7		8		9		10		11		12		13		14		15		16		17		18		19		20		21		22		23		24
Gli1-Ctrl		0.256565		0.0803745		0.185531		0.129312		0.191755		0		0.146497										0.262329		0.102937		0.317929		0.444505		0.339107		0.370341		0.485639		0.491413		0.373647				0.551288		0.677844		0.711158
Gli1-bromi		-0.00215954		0.0619601		0.209286		0.0988051		0.250287												0.291234		0.259165		0.251024		0.00707473		-0.124497
[truncated: 7 more columns]

## Sheet: Ptch1 
Tbc1d32_bromi
		1		2		3		4		5		6		7		8		9		10		11		12		13		14		15		16		17		18		19		20		21		22		23		24
Ptch1-Ctrl		0.00814788		0.0079522		0.0299433		0.0243207		0.0033788		0		0.159018										0.0477915		0.0457005		0.0983244		0.0669554		0.143326		0.22124		0.10385		0.124045		0.418735				0.320979		0.478135		0.640945
Ptch1-bromi		0.00675946		-0.075517		-0.157439		-0.11862		0.0277516												0.0109974		-0.0392578		0.119717		-0.0471467		-0.0787803
[truncated: 18 more columns]

## Sheet: Atoh1
Tbc1d32_bromi
		1		2		3		4		5		6		7		8		9		10		11		12		13		14		15		16		17		18		19		20		21		22		23		24
Atoh1-Ctrl		0		0.470009		0.413904		1		0.913202		0.956696		0.913746										0.684527		0.616781		0.826807		0.847135		0.668432		0.627278		0.600868		0.549155		0.302313				0.301254		0.32086	-0.0120118	-0.0120118
Atoh1-bromi		-0.140049		-0.196763		0.627769		0.699212		1.0481												1.31465		1.25196		1.28848		1.49755		0.97942
[truncated: 7 more columns]

## Sheet: Sox2
Tbc1d32_bromi
		1		2		3		4		5		6		7		8		9		10		11		12		13		14		15		16		17		18		19		20		21		22		23		24
Sox2-Ctrl		0.83		0.782288		0.55206		0.62669		0.658043		0.531538		0.732571										1		0.860164		0.771941		0.779095		0.578636		0.811374		0.58181		0.599224		0.518903				0.439027		0.616278	0.300263	0.300263
Sox2-bromi		0.497021		0.543169		0.415947		0.559737		0.756191												0.751095		0.752747		0.769611		0.510797		0.469058
[truncated: 7 more columns]
