# Supplementary material for: Dysregulation of sonic hedgehog signaling causes hearing loss in ciliopathy mouse models
Source: eLife. 2020 Dec 31;9:e56551. doi: 10.7554/eLife.56551 (PMC7806262; doi:10.7554/eLife.56551)
Supplement: Figure 3—figure supplement 1—source data 3. [file elife-56551-fig3-figsupp1-data3.xlsx]

## Sheet: Cilk1 in situ intensity data
Duct #	1	2	3	4	5	6	7	8	9	10	11	12	13	14	15	16	17	18	19	20	21	22	23	24	25	26	27	28	29	30	31	32	33	34	35	36	37	38	39		Min
Atoh1-Ctrl	2981	18285	56456	65614	73004	68038	71079	86583						114835	81709	91419	78514	72753	75740	78727		68019		69979		37853	46941	44167	50019	29934	21058	20206				205	331	2086	402		29934
Atoh1-KO	10530	56586	49568	55530	74052						101364		96746	108822	126184	121257	84931	86303	70177	15643	6970	4081		1482	3891		11820	1921	-37
Sox2-Ctrl	209782	204408	181727	170924	194137	153924	185042	176464						286811	290145	254671	315416	283536	241764	208069	229954	270882	200011	263180	247713	201618	200313	209776	223691	250821	175866	208918				229715	174341	213094	282449		38976
Sox2-KO	197549	300017	240116		302331						314139	324704	329885	340910	292022	296824	236604	271814	263597	263604		270691	265319	227659	257157	270391	273441	185615
Ptch1-Ctrl	126905	242375	166935	311954	171410	433626	253185					540586	445189	677846	843075	862906	711458	987595	1021122	1016051	824161		934319	1009899	1125238	1283963	1249246	1294087	1302433							1315425	1360873				126905
Ptch1-KO	130810	232170	262273	195749	197645	236739	292065	231453	135285	331548				249535	303184	406304	442731	358397	497151	661908	759125	764838	827275			973998	903289	824899	839196	804235	691874	598101
Gli1-Ctrl	24335.5	48012	49283	35441	41870	30193	43506		53731	37297		42147	73469	102506	86050	80672	108000	137695	138378	166613	148813		152280	155087	219845	237451	233933	217649	247460	210509	231539			222625	287695	287852	228949				24335.5
Gli1-KO		1670	46556	29879			43340		64855	38220		67266	39544	66813	53178.5			84778	79692	85182	135379		135452	158565	125783	124862			150794	147126	120480
minus Min																																									Max of minus min
Atoh1-Ctrl	-26953	-11649	26522	35680	43070	38104	41145	56649						84901	51775	61485	48580	42819	45806	48793		38085		40045		7919	17007	14233	20085	0	-8876	-9728				-29729	-29603	-27848	-29532		84901
Atoh1-KO	-19404	26652	19634	25596	44118						71430		66812	78888	96250	91323	54997	56369	40243	-14291	-22964	-25853		-28452	-26043		-18114	-28013	-29971
Sox2-Ctrl	170806	165432	142751		155161	114948	146066	137488						247835	251169	215695	276440	244560	202788	169093	190978	231906	161035	224204	208737	162642	161337	170800	184715	211845	136890	169942				190739	135365	174118	243473		276440
Sox2-KO	158573	261041	201140		263355						275163	285728	290909	301934	253046	257848	197628	232838	224621	224628		231715	226343	188683	218181	231415	234465	146639
Ptch1-Ctrl	0	115470	40030	185049	44505	306721	126280					413681	318284	550942	716170	736001	584553	860690	894217	889146	697256		807414	882994	998333	1157058	1122341	1167182	1175528							1188520	1233968				1233968
Ptch1-KO	3905	105265	135368	68844	70740	109834	165160	104548	8380	204643				122630	176279	279399	315826	231492	370246	535003	632220	637933	700370			847093	776384	697994	712291	677330	564969	471196
Gli1-Ctrl	0	23676.5	24947.5	11105.5	17534.5	5857.5	19170.5		29395.5	12961.5		17811.5	49133.5	78170	61714.5	56336.5	83664.5	113360	114042	142278	124478		127944	130752	195510	213116	209598	193314	223124	186174	207204			198290	263360	263516	204614				263516
Gli1-KO		-22665.5	22220.5	5543.5			19004.5		40519.5	13884.5		42930.5	15208.5	42477.5	28843			60442.5	55356.5	60846.5	111044		111116	134230	101448	100526			126458	122790	96144.5
% value
minus Min	1	2	3	4	5	6	7	8	9	10	11	12	13	14	15	16	17	18	19	20	21	22	23	24	25	26	27	28	29	30	31	32	33	34	35	36	37	38	39
Atoh1-Ctrl	-0.317464	-0.137207	0.312387	0.420254	0.507297	0.448805	0.484623	0.667236						1	0.609828	0.724196	0.572196	0.50434	0.539523	0.574705		0.448581		0.471667		0.0932733	0.200316	0.167642	0.23657	0	-0.104545	-0.114581				-0.350161	-0.348677	-0.328006	-0.34784
Atoh1-KO	-0.228549	0.313919	0.231258	0.301481	0.519641						0.841333		0.78694	0.929176	1.13367	1.07564	0.647778	0.663938	0.473999	-0.168325	-0.27048	-0.304508		-0.33512	-0.306746		-0.213354	-0.329949	-0.353011
Sox2-Ctrl	0.617877	0.598437	0.516391		0.561283	0.415815	0.528382	0.497352						0.896524	0.908584	0.78026	1	0.884677	0.73357	0.611681	0.690848	0.838902	0.582531	0.81104			0.583624	0.617856	0.668192	0.766333	0.495189	0.614752
Sox2-KO	0.573625	0.944295	0.727608		0.952666						0.995381	1.0336	1.05234	1.09222	0.915374	0.932745	0.714904	0.842273	0.812549	0.812574		0.838211	0.818778	0.682546	0.789253	0.837126	0.848159	0.530455
Ptch1-Ctrl	0	0.0935762	0.0324401	0.149963	0.0360666	0.248565	0.102337					0.335245	0.257935	0.44648	0.58038	0.596451	0.473718	0.697498	0.724668	0.720558	0.565052		0.654323	0.715573	0.809043	0.937673	0.909538	0.945877	0.952641							0.963169	1
Ptch1-KO	0.00316459	0.0853061	0.109701	0.0557907	0.0573273	0.0890088	0.133845	0.084725	0.0067911	0.165841				0.0993786	0.142855	0.226423	0.255943	0.1876	0.300045	0.433563	0.512347	0.516977	0.567575			0.686479	0.629177	0.56565	0.577236	0.548904	0.457847	0.381854
Gli1-Ctrl	0	0.0898483	0.0946715	0.0421435	0.0665404	0.0222282	0.0727488		0.111551	0.0491867		0.0675916	0.186453	0.296642	0.234196	0.213787	0.317492	0.43018	0.432772	0.539919	0.472371		0.485527	0.49618	0.741925	0.808737	0.795387	0.733592	0.846719	0.706497	0.786302			0.752475	0.999404	1	0.776473
Gli1-KO		-0.0860117	0.084323	0.0210366			0.0721188		0.153765	0.0526893		0.162914	0.0577137	0.161195	0.109454			0.229369	0.210068	0.230902	0.421391		0.421668	0.509378	0.384976	0.381481			0.479888	0.465969	0.364852

## Sheet: Ptch1
Cilk1 KO
		1		2		3		4		5		6		7		8		9		10		11		12		13		14		15		16		17		18		19		20		21		22		23		24
Ptch1-Ctrl		0		0.0935762		0.0324401		0.149963		0.0360666		0.248565		0.102337												0.257935		0.44648		0.58038		0.596451		0.473718		0.697498		0.724668		0.720558		0.565052				0.654323		0.715573
Ptch1-KO		0.00316459		0.0853061		0.109701		0.0557907		0.0573273		0.0890088		0.133845		0.084725		0.0067911		0.165841								0.0993786		0.142855		0.226423		0.255943		0.1876		0.300045		0.433563		0.512347		0.516977		0.567575
[truncated: 14 more columns]

## Sheet: Gli1
Cilk1 KO
		1		2		3		4		5		6		7		8		9		10		11		12		13		14		15		16		17		18		19		20		21		22		23		24
Gli1-Ctrl		0		0.0898483		0.0946715		0.0421435		0.0665404		0.0222282		0.0727488				0.111551		0.0491867				0.0675916		0.186453		0.296642		0.234196		0.213787		0.317492		0.43018		0.432772		0.539919		0.472371				0.485527		0.49618
Gli1-KO				-0.0860117		0.084323		0.0210366						0.0721188				0.153765		0.0526893				0.162914		0.0577137		0.161195		0.109454						0.229369		0.210068		0.230902		0.421391				0.421668		0.509378
[truncated: 13 more columns]

## Sheet: Atoh1
Cilk1 KO
		1		2		3		4		5		6		7		8		9		10		11		12		13		14		15		16		17		18		19		20		21		22		23		24
Atoh1-Ctrl		-0.197464		-0.137207		0.312387		0.420254		0.507297		0.448805		0.484623		0.667236												1		0.609828		0.724196		0.572196		0.50434		0.539523		0.574705				0.448581				0.471667
Atoh1-KO		-0.128549		0.313919		0.231258		0.301481		0.519641												0.841333				0.78694		0.929176		1.13367		1.07564		0.647778		0.663938		0.473999		-0.168325		-0.17048		-0.104508				-0.13512
[truncated: 15 more columns]

## Sheet: Sox2
Cilk1 cKO
		1		2		3		4		5		6		7		8		9		10		11		12		13		14		15		16		17		18		19		20		21		22		23		24
Sox2-Ctrl		0.617877		0.598437		0.516391				0.561283		0.415815		0.528382		0.497352												0.896524		0.908584		0.78026		1		0.884677		0.73357		0.611681		0.690848		0.838902		0.582531		0.81104
Sox2-KO		0.573625		0.944295		0.727608				0.952666												0.995381		1.0336		1.05234		1.09222		0.915374		0.932745		0.714904		0.842273		0.812549		0.812574				0.838211		0.818778		0.682546
[truncated: 18 more columns]
