# Supplementary material for: Dysregulation of sonic hedgehog signaling causes hearing loss in ciliopathy mouse models
Source: eLife. 2020 Dec 31;9:e56551. doi: 10.7554/eLife.56551 (PMC7806262; doi:10.7554/eLife.56551)
Supplement: Figure 3—source data 1. [file elife-56551-fig3-data1.xlsx]

## Sheet: Ift88 qPCR
Zone	Sample Name	Target Name	Cт		Cт Mean	ΔCt	ΔΔCt	(-)ΔΔCт	2^(-)ΔΔCт		Sample Name	Target Name	Cт	Cт Mean	ΔCt	ΔΔCt	(-)ΔΔCт	2^(-)ΔΔCт
1	Ift88 ctrl	GAPDH	19.417		19.4081	0	-13.5112	13.5112	11675.7	1	Ift88 ctrl	GAPDH	19.2376	19.294	0	-12.6315	12.6315	6345.41
1	Ift88 ctrl	GAPDH	19.2632							1	Ift88 ctrl	GAPDH	19.2781
2	Ift88 ctrl	GAPDH	19.5443							2	Ift88 ctrl	GAPDH	19.3664
2	Ift88 ctrl	Ptch1_2018	27.9335		27.9406	8.53247	-4.97875	4.97875	31.532	2	Ift88 ctrl	Ptch1_2018	27.9237	27.8744	8.58039	-4.05111	4.05111	16.577
3	Ift88 ctrl	Ptch1_2018	27.9608							3	Ift88 ctrl	Ptch1_2018	27.7454
3	Ift88 ctrl	Ptch1_2018	27.9275							3	Ift88 ctrl	Ptch1_2018	27.9542
4	Ift88 ctrl	Ptch1_New2	27.0909		27.01	7.60185	-5.90936	5.90936	60.103	4	Ift88 ctrl	Ptch1_New2	26.9985	27.0189	7.72482	-4.90668	4.90668	29.9956
4	Ift88 ctrl	Ptch1_New2	27.0167							4	Ift88 ctrl	Ptch1_New2	27.0152
5	Ift88 ctrl	Ptch1_New2	26.9224							5	Ift88 ctrl	Ptch1_New2	27.0428
5	Ift88 ctrl	Gli1_New	25.925		25.9105	6.50232	-7.0089	7.0089	128.792	5	Ift88 ctrl	Gli1_New	25.8536	25.8744	6.5804	-6.0511	6.0511	66.3075
6	Ift88 ctrl	Gli1_New	25.9066							6	Ift88 ctrl	Gli1_New	25.8375
6	Ift88 ctrl	Gli1_New	25.8997							6	Ift88 ctrl	Gli1_New	25.9322
1	Ift88 cKO	GAPDH	21.8986		21.9394	0	-13.5112	13.5112	11675.7	1	Ift88 cKO	GAPDH	21.9189	21.923	0	-12.6315	12.6315	6345.41
1	Ift88 cKO	GAPDH	21.9552							1	Ift88 cKO	GAPDH	21.9208
2	Ift88 cKO	GAPDH	21.9644							2	Ift88 cKO	GAPDH	21.9294
2	Ift88 cKO	Ptch1_2018	33.6306		33.7318	11.7924	-1.71883	1.71883	3.29168	2	Ift88 cKO	Ptch1_2018	33.6004	33.9494	12.0263	-0.605184	0.605184	1.52117
3	Ift88 cKO	Ptch1_2018	33.6528							3	Ift88 cKO	Ptch1_2018	33.8504
3	Ift88 cKO	Ptch1_2018	33.9121							3	Ift88 cKO	Ptch1_2018	34.3972
4	Ift88 cKO	Ptch1_New2	35.2097		35.4506	13.5112	0	0	1	4	Ift88 cKO	Ptch1_New2	34.5643	34.5545	12.6315	0	0	1
4	Ift88 cKO	Ptch1_New2	35.2022							4	Ift88 cKO	Ptch1_New2	34.5454
5	Ift88 cKO	Ptch1_New2	35.94							5	Ift88 cKO	Ptch1_New2	34.5539
5	Ift88 cKO	Gli1_New	32.4438		32.0775	10.1381	-3.37309	3.37309	10.361	5	Ift88 cKO	Gli1_New	32.4819	31.8703	9.94728	-2.68422	2.68422	6.42733
6	Ift88 cKO	Gli1_New	31.4979							6	Ift88 cKO	Gli1_New	31.0711
6	Ift88 cKO	Gli1_New	32.291							6	Ift88 cKO	Gli1_New	32.058
						13.5112									12.6315
Zone	Sample Name	Target Name	Cт		Cт Mean	ΔCt	ΔΔCt	(-)ΔΔCт	2^(-)ΔΔCт		Sample Name	Target Name	Cт	Cт Mean	ΔCt	ΔΔCt	(-)ΔΔCт	2^(-)ΔΔCт
1	Ift88 ctrl	GAPDH	19.417		19.4081	0	-11.5029	11.5029	2902.12	1	Ift88 ctrl	GAPDH	19.2376	19.294	0	-11.3542	11.3542	2617.97
1	Ift88 ctrl	GAPDH	19.2632							1	Ift88 ctrl	GAPDH	19.2781
2	Ift88 ctrl	GAPDH	19.5443							2	Ift88 ctrl	GAPDH	19.3664
2	Ift88 ctrl	Ptch1_2018	27.9335		27.9406	8.53247	-2.97042	2.97042	7.83762	2	Ift88 ctrl	Ptch1_2018	27.9237	27.8744	8.58039	-2.77384	2.77384	6.83926
3	Ift88 ctrl	Ptch1_2018	27.9608							3	Ift88 ctrl	Ptch1_2018	27.7454
3	Ift88 ctrl	Ptch1_2018	27.9275							3	Ift88 ctrl	Ptch1_2018	27.9542
4	Ift88 ctrl	Ptch1_New2	27.0909		27.01	7.60185	-3.90104	3.90104	14.9393	4	Ift88 ctrl	Ptch1_New2	26.9985	27.0189	7.72482	-3.62941	3.62941	12.3755
4	Ift88 ctrl	Ptch1_New2	27.0167							4	Ift88 ctrl	Ptch1_New2	27.0152
5	Ift88 ctrl	Ptch1_New2	26.9224							5	Ift88 ctrl	Ptch1_New2	27.0428
5	Ift88 ctrl	Gli1_New	25.925		25.9105	6.50232	-5.00057	5.00057	32.0127	5	Ift88 ctrl	Gli1_New	25.8536	25.8744	6.5804	-4.77383	4.77383	27.3569
6	Ift88 ctrl	Gli1_New	25.9066							6	Ift88 ctrl	Gli1_New	25.8375
6	Ift88 ctrl	Gli1_New	25.8997							6	Ift88 ctrl	Gli1_New	25.9322
1	Ift88 cKO old	GAPDH	19.2529		19.264	0	-11.5029	11.5029	2902.12	1	Ift88 cKO old	GAPDH	19.3392	19.2842	0	-11.3542	11.3542	2617.97
1	Ift88 cKO old	GAPDH	19.2424							1	Ift88 cKO old	GAPDH	19.2181
2	Ift88 cKO old	GAPDH	19.2968							2	Ift88 cKO old	GAPDH	19.2953
2	Ift88 cKO old	Ptch1_2018	30.8723		30.7669	11.5029	0	0	1	2	Ift88 cKO old	Ptch1_2018	30.5761	30.6385	11.3542	0	0	1
3	Ift88 cKO old	Ptch1_2018	30.7432							3	Ift88 cKO old	Ptch1_2018	30.6922
3	Ift88 cKO old	Ptch1_2018	30.6852							3	Ift88 cKO old	Ptch1_2018	30.647
4	Ift88 cKO old	Ptch1_New2	29.5357		29.6133	10.3493	-1.15364	1.15364	2.22474	4	Ift88 cKO old	Ptch1_New2	29.4312	29.5945	10.3103	-1.04393	1.04393	2.06184
4	Ift88 cKO old	Ptch1_New2	29.7734							4	Ift88 cKO old	Ptch1_New2	29.7902
5	Ift88 cKO old	Ptch1_New2	29.5307							5	Ift88 cKO old	Ptch1_New2	29.5622
5	Ift88 cKO old	Gli1_New	27.2979		27.1899	7.9259	-3.57699	3.57699	11.9339	5	Ift88 cKO old	Gli1_New	27.1598	27.213	7.92879	-3.42545	3.42545	10.7439
6	Ift88 cKO old	Gli1_New	27.1393							6	Ift88 cKO old	Gli1_New	27.3306
6	Ift88 cKO old	Gli1_New	27.1325							6	Ift88 cKO old	Gli1_New	27.1487
						11.5029									11.3542
	Sample Name	Target Name	ΔCt	ΔCt mean	ΔΔCt	2^(-)ΔΔCт	average	STER	t-test
	Ift88 ctrl	Ptch1	8.53247	8.10989	0.422589	0.746084	1.04896	0.120133	4.0707e-05				average	Ptch1	Gli1
			7.60185		-0.50803	1.42211							Control	1.04896	1.00037
			8.58039		0.470505	0.721712							Ift88 cKO	0.105173	0.235564
			7.72482		-0.385065	1.30592
			8.53247		0.422589	0.746084
			7.60185		-0.50803	1.42211
			8.58039		0.470505	0.721712							STER	Ptch1	Gli1
			7.72482		-0.385065	1.30592							Control	0.120133	0.0156245
	Ift88 cKO		11.7924		3.68251	0.0778851	0.105173	0.025636					Ift88 cKO	0.025636	0.0849415
			13.5112		5.40133	0.0236612
			12.0263		3.91643	0.0662274
			12.6315		4.52161	0.0435371
			11.5029		3.39301	0.0951927
			10.3493		2.23937	0.211779
			11.3542		3.24435	0.105525
			10.3103		2.20042	0.217575
	Ift88 ctrl	Gli1	6.50232	6.54136	-0.039038	1.02743	1.00037	0.0156245	0.00153252
			6.5804		0.039038	0.973304
			6.50232		-0.039038	1.02743
			6.5804		0.039038	0.973304
	Ift88 cKO		10.1381		3.59677	0.0826539	0.235564	0.0849415
			9.94728		3.40592	0.0943445
			7.9259		1.38454	0.383012
			7.92879		1.38743	0.382246

## Sheet: Tbc32_bromi qPCR
	Sample Name	Target Name	Cт	Cт mean	ΔCt	ΔΔCt	(-)ΔΔCт	2^(-)ΔΔCт		1	bromi ctrl-2	GAPDH	17.379	17.563	0	-11.3204	11.3204	2557.35
1	bromi ctrl-2	GAPDH	17.3985	17.5258	0	-12.1099	12.1099	4420.22		1	bromi ctrl-2	GAPDH	17.3729
1	bromi ctrl-2	GAPDH	17.8257							2	bromi ctrl-2	GAPDH	17.937
2	bromi ctrl-2	GAPDH	17.3532							2	bromi ctrl-2	Ptch1 2018	26.2978	26.3087	8.74569	-2.57474	2.57474	5.95765
2	bromi ctrl-2	Ptch1 2018	26.4065	26.3782	8.85244	-3.25746	3.25746	9.56297		3	bromi ctrl-2	Ptch1 2018	26.3279
3	bromi ctrl-2	Ptch1 2018	26.3434							3	bromi ctrl-2	Ptch1 2018	26.3003
3	bromi ctrl-2	Ptch1 2018	26.3848							4	bromi ctrl-2	Ptch1 new2	24.9354	25.5446	7.9816	-3.33884	3.33884	10.1179
4	bromi ctrl-2	Ptch1 new2	25.9486	25.941	8.41522	-3.69468	3.69468	12.9482		4	bromi ctrl-2	Ptch1 new2	25.8672
4	bromi ctrl-2	Ptch1 new2	25.9213							5	bromi ctrl-2	Ptch1 new2	25.8311
5	bromi ctrl-2	Ptch1 new2	25.9532							5	bromi ctrl-2	Gli1	24.2664	24.3409	6.77793	-4.54251	4.54251	23.304
5	bromi ctrl-2	Gli1	24.3076	24.3525	6.82673	-5.28317	5.28317	38.9398		6	bromi ctrl-2	Gli1	24.2784
6	bromi ctrl-2	Gli1	24.2972							6	bromi ctrl-2	Gli1	24.4779
6	bromi ctrl-2	Gli1	24.4528							1	bromi mut 2x-2	GAPDH	21.708	21.7816	0	-11.3204	11.3204	2557.35
1	bromi mut 2x-2	GAPDH	21.6844	21.6473	0	-12.1099	12.1099	4420.22		1	bromi mut 2x-2	GAPDH	21.7116
1	bromi mut 2x-2	GAPDH	21.6385							2	bromi mut 2x-2	GAPDH	21.9251
2	bromi mut 2x-2	GAPDH	21.619							2	bromi mut 2x-2	Ptch1 2018	29.6346	30.8862	9.1046	-2.21584	2.21584	4.64552
2	bromi mut 2x-2	Ptch1 2018	33.4289	32.3743	10.727	-1.38291	1.38291	2.60793		3	bromi mut 2x-2	Ptch1 2018	31.0853
3	bromi mut 2x-2	Ptch1 2018	32.2208							3	bromi mut 2x-2	Ptch1 2018	31.9387
3	bromi mut 2x-2	Ptch1 2018	31.4732							4	bromi mut 2x-2	Ptch1 new2	33.4406	33.102	11.3204	0	0	1
4	bromi mut 2x-2	Ptch1 new2	33.6034	33.7572	12.1099	0	0	1		4	bromi mut 2x-2	Ptch1 new2	32.8486
4	bromi mut 2x-2	Ptch1 new2	33.9109							5	bromi mut 2x-2	Ptch1 new2	33.0168
5	bromi mut 2x-2	Ptch1 new2								5	bromi mut 2x-2	Gli1	30.4432	30.5403	8.75875	-2.56168	2.56168	5.90396
5	bromi mut 2x-2	Gli1	30.2134	30.3685	8.72123	-3.38867	3.38867	10.4735		6	bromi mut 2x-2	Gli1	30.8379
6	bromi mut 2x-2	Gli1	30.1466							6	bromi mut 2x-2	Gli1	30.3399
6	bromi mut 2x-2	Gli1	30.7456												11.3204
					12.1099
	Sample Name	Target Name	Cт	Cт mean	Cт mean	ΔCt	ΔΔCt	(-)ΔΔCт	2^(-)ΔΔCт
	Bromi ctrl	GAPDH-D	19.8919	19.8648	19.8648	0	-12.4967	12.4967	5779.47
	Bromi ctrl	GAPDH-D	19.9177	19.8648
	Bromi ctrl	GAPDH-D	19.7846	19.8648
	Bromi ctrl	Gli1	27.1063	27.1094	27.1094	7.24468	-5.25204	5.25204	38.1085
	Bromi ctrl	Gli1	27.1357	27.1094
	Bromi ctrl	Gli1	27.0862	27.1094
	Bromi ctrl	Ptch1	28.5327	28.5898	28.5898	8.72509	-3.77163	3.77163	13.6576
	Bromi ctrl	Ptch1	28.6352	28.5898
	Bromi ctrl	Ptch1	28.6016	28.5898
	Bromi mut	GAPDH-D	21.9604	21.9363	21.9363	0	-12.4967	12.4967	5779.47
	Bromi mut	GAPDH-D	21.9276	21.9363
	Bromi mut	GAPDH-D	21.9209	21.9363
	Bromi mut	Gli1	30.275	30.464	30.464	8.52766	-3.96906	3.96906	15.6605
	Bromi mut	Gli1	30.5956	30.464
	Bromi mut	Gli1	30.5212	30.464
	Bromi mut	Ptch1	33.2921	34.433	34.433	12.4967	0	0	1
	Bromi mut	Ptch1	32.9459	34.433
	Bromi mut	Ptch1	37.0611	34.433
						12.4967
		0.807518	1.09338	0.869536	1.47673	0.88204
		0.22022	0.0844422	0.678026	0.145953	0.0645826
		1.08904	1.1265	0.815129
		0.292914	0.285394	0.334974
														Ptch1	Gli1
	Sample Name	Target Name	ΔCt	ave ΔCt	ΔΔCt	2^(-)ΔΔCт		average	ster	ttest			Control	1.02584	1.01022
	Bromi ctrl	Ptch1	8.85244	8.54401	0.308433	0.807518	0.807518	1.02584	0.122605	0.00153187			bromi	0.238645	0.304427
			8.41522		-0.128791	1.09338	1.09338
			8.74569		0.201683	0.869536	0.869536						Control	0.122605	0.0981441
			7.9816		-0.56241	1.47673	1.47673						bromi	0.113151	0.0154268
			8.72509		0.181084	0.88204	0.88204
	Bromi mut	Ptch1	10.727		2.18299	0.22022	0.22022	0.238645	0.113151
			12.1099		3.56589	0.0844422	0.0844422
			9.1046		0.560588	0.678026	0.678026
			11.3204		2.77643	0.145953	0.145953
			12.4967		3.95271	0.0645826	0.0645826
			ΔCt	ave ΔCt	ΔΔCt	2^(-)ΔΔCт		average	stdev	ttest
	Bromi ctrl	Gli1	6.82673	6.94978	-0.123051	1.08904	1.08904	1.01022	0.0981441	0.0168852
			6.77793		-0.171848	1.1265	1.1265
			7.24468		0.2949	0.815129	0.815129
	Bromi mut	Gli1	8.72123		1.77145	0.292914	0.292914	0.304427	0.0154268
			8.75875		1.80897	0.285394	0.285394
			8.52766		1.57788	0.334974	0.334974

## Sheet: Cilk1 KO qPCR
	Sample Name	Target Name	Ct	Ct mean	ΔCt						Sample Name	Target Name	Ct	Ct mean	ΔCt
	Cilk1 CTRL	Rpl19	20.018	20.0142	0	0	0	1			Cilk1 CTRL	Rpl19	19.9277	19.9448	0	0	0	1
	Cilk1 CTRL	Rpl19	19.9515								Cilk1 CTRL	Rpl19	19.9561
	Cilk1 CTRL	Rpl19	20.073								Cilk1 CTRL	Rpl19	19.9506
	Cilk1 CTRL	Gapdh-DKU	19.8548	19.8567	-0.157415	-0.157415	0.157415	1.11529			Cilk1 CTRL	Gapdh-DKU	19.8579	19.8469	-0.0978864	-0.0978864	0.0978864	1.0702
	Cilk1 CTRL	Gapdh-DKU	19.8549								Cilk1 CTRL	Gapdh-DKU	19.8244
	Cilk1 CTRL	Gapdh-DKU	19.8605								Cilk1 CTRL	Gapdh-DKU	19.8585
	Cilk1 CTRL	Gli1	26.7942	26.756	6.7418	6.7418	-6.7418	0.00934363			Cilk1 CTRL	Gli1	26.1191	26.1655	6.22073	6.22073	-6.22073	0.0134083
	Cilk1 CTRL	Gli1	26.7275								Cilk1 CTRL	Gli1	26.2273
	Cilk1 CTRL	Gli1	26.7462								Cilk1 CTRL	Gli1	26.1502
	Cilk1 CTRL	Ptch1	30.4803	30.3699	10.3557	10.3557	-10.3557	0.000763165			Cilk1 CTRL	Ptch1	29.2862	29.3681	9.42334	9.42334	-9.42334	0.00145644
	Cilk1 CTRL	Ptch1	30.0987								Cilk1 CTRL	Ptch1	29.3278
	Cilk1 CTRL	Ptch1	30.5306								Cilk1 CTRL	Ptch1	29.4904
	Cilk1 KO	Rpl19	20.9311	20.9495	0	0	0	1			Cilk1 KO	Rpl19	20.9362	20.9485	0	0	0	1
	Cilk1 KO	Rpl19	20.9457								Cilk1 KO	Rpl19	20.9345
	Cilk1 KO	Rpl19	20.9718								Cilk1 KO	Rpl19	20.9746
	Cilk1 KO	Gapdh-DKU	20.7948	20.7976	-0.151967	-0.151967	0.151967	1.11108			Cilk1 KO	Gapdh-DKU	20.8011	20.8167	-0.131732	-0.131732	0.131732	1.09561
	Cilk1 KO	Gapdh-DKU	20.8142								Cilk1 KO	Gapdh-DKU	20.8096
	Cilk1 KO	Gapdh-DKU	20.7837								Cilk1 KO	Gapdh-DKU	20.8395
	Cilk1 KO	Gli1	28.9533	28.9183	7.96875	7.96875	-7.96875	0.00399179			Cilk1 KO	Gli1	28.464	27.7101	6.7616	6.7616	-6.7616	0.00921627
	Cilk1 KO	Gli1	28.9329								Cilk1 KO	Gli1	28.4325
	Cilk1 KO	Gli1	28.8686								Cilk1 KO	Gli1	26.2337
	Cilk1 KO	Ptch1	31.8677	31.8672	10.9177	10.9177	-10.9177	0.000516948			Cilk1 KO	Ptch1	30.9026	31.0509	10.1024	10.1024	-10.1024	0.000909627
	Cilk1 KO	Ptch1	31.9309								Cilk1 KO	Ptch1	31.1619
	Cilk1 KO	Ptch1	31.803								Cilk1 KO	Ptch1	31.0883
					10.9177										10.1024
	180605 data-1
	Sample Name	Target Name	Ct	Ct mean	ΔCt						Sample Name	Target Name	Ct	Ct mean	ΔCt
	Cilk1 CTRL	Gapdh-DKU	18.9485	18.9267	0						Cilk1 CTRL	Gapdh-DKU	18.7726	18.7703	0
	Cilk1 CTRL	Gapdh-DKU	18.9221								Cilk1 CTRL	Gapdh-DKU	18.7719
	Cilk1 CTRL	Gapdh-DKU	18.9096								Cilk1 CTRL	Gapdh-DKU	18.7663
	Cilk1 CTRL	Gli1	25.5938	26.383	7.45632						Cilk1 CTRL	Gli1	26.6337	26.6504	7.88019
	Cilk1 CTRL	Gli1	26.7563								Cilk1 CTRL	Gli1	26.6667
	Cilk1 CTRL	Gli1	26.7991								Cilk1 CTRL	Gli1	26.651
	Cilk1 CTRL	Ptch1	27.8985	27.7761	8.84935						Cilk1 CTRL	Ptch1		28.7058	9.93559
	Cilk1 CTRL	Ptch1	26.9043								Cilk1 CTRL	Ptch1	28.6257
	Cilk1 CTRL	Ptch1	28.5254								Cilk1 CTRL	Ptch1	28.786
	Cilk1 KO 1	Gapdh-DKU	18.8212	18.7904	0						Cilk1 KO2	Gapdh-DKU	18.8052	18.7832	0
	Cilk1 KO 1	Gapdh-DKU	18.8102								Cilk1 KO2	Gapdh-DKU	18.7793
	Cilk1 KO 1	Gapdh-DKU	18.7398								Cilk1 KO2	Gapdh-DKU	18.7652
	Cilk1 KO 1	Gli1	26.9299	27.0611	8.27068						Cilk1 KO2	Gli1	27.5593	27.4142	8.63097
	Cilk1 KO 1	Gli1	27.1604								Cilk1 KO2	Gli1	27.4823
	Cilk1 KO 1	Gli1	27.0929								Cilk1 KO2	Gli1	27.201
	Cilk1 KO 1	Ptch1	28.9276	28.9472	10.1568						Cilk1 KO2	Ptch1	29.0359	29.3837	10.6005
	Cilk1 KO 1	Ptch1	29.0783								Cilk1 KO2	Ptch1	29.923
	Cilk1 KO 1	Ptch1	28.8357								Cilk1 KO2	Ptch1	29.1922
	Sample Name	Target Name	ΔCt	ave ΔCt	ΔΔCt	2^(-)ΔΔCт	average	ster	t-test			average	Ptch1	Gli1
	Cilk1 ctrl	0	10.3557	9.641	0.714719	0.609324	1.07963	0.245344	0.0390518			Cilk1 ctrl	1.07963	1.10173
			9.42334		-0.217662	1.16285						Cilk1 KO	0.588165	0.639275
			8.84935		-0.791646	1.73105
			9.93559		0.294589	0.815304
	Cilk1 KO		10.9177		1.27669	0.41274	0.588165	0.0751043				STER	0.245344	0.276156
			10.1024		0.461439	0.726261							0.0751043	0.205076
			10.1568		0.515767	0.699421
			10.6005		0.959497	0.514236
	Cilk1 ctrl	Gli1	6.7418	7.07476	-0.332958	1.25959	1.10173	0.276156	0.0125895
			6.22073		-0.854033	1.80755
			7.45632		0.381565	0.767605
			7.88019		0.805426	0.572193
	Cilk1 KO		7.96875		0.89399	0.538124	0.639275	0.205076
			6.7616		-0.313157	1.24242
			8.27068		1.19592	0.436507
			8.63097		1.55621	0.340043
