# Supplementary material for: Dysregulation of sonic hedgehog signaling causes hearing loss in ciliopathy mouse models
Source: eLife. 2020 Dec 31;9:e56551. doi: 10.7554/eLife.56551 (PMC7806262; doi:10.7554/eLife.56551)
Supplement: Figure 4—source data 1. [file elife-56551-fig4-data1.xlsx]

## Sheet: Cilk1_cilia length
	wild type1		Age	E14.5	Control	at least 100 cells from 1 embryo					Cilk1 KO 1		Age	E14.5	KO	at least 100 cells from 1 embryo
																						Control	KO	Control	KO	Control	KO
	Base	Length(um)		Mid	Length(um)		Apex	Length(um)			Base	Length(um)		Mid	Length(um)		Apex	Length(um)				Base	Base	Mid	Mid	Apex	Apex
	1	1.519		1	1.146		1	1.309			1	2.034		1	2.289		1	1.576				1.519	2.034	1.146	2.289	1.309	1.576
	2	1.468		2	1.141		2	1.239			2	2.038		2	1.664		2	1.66				1.468	2.038	1.141	1.664	1.239	1.66
	3	1.082		3	1.37		3	1.046			3	2.261		3	1.507		3	1.328				1.082	2.261	1.37	1.507	1.046	1.328
	4	1.549		4	1.087		4	1.089			4	3.163		4	1.86		4	1.938				1.549	3.163	1.087	1.86	1.089	1.938
	5	1.167		5	1.139		5	0.97			5	2.7		5	1.522		5	1.325				1.167	2.7	1.139	1.522	0.97	1.325
	6	1.294		6	0.904		6	1.14			6	2.047		6	1.966		6	1.647				1.294	2.047	0.904	1.966	1.14	1.647
	7	1.528		7	1.092		7	0.798			7	1.616		7	1.678		7	2.383				1.528	1.616	1.092	1.678	0.798	2.383
	8	1.525		8	0.871		8	1.077			8	3.404		8	1.652		8	1.776				1.525	3.404	0.871	1.652	1.077	1.776
	9	1.371		9	1.033		9	1.014			9	2.561		9	2.194		9	1.217				1.371	2.561	1.033	2.194	1.014	1.217
	10	1.299		10	0.946		10	1.169			10	1.893		10	1.804		10	2.028				1.299	1.893	0.946	1.804	1.169	2.028
	11	1.703		11	1.355		11	2.059			11	2.785		11	1.629		11	1.797				1.703	2.785	1.355	1.629	2.059	1.797
	12	2.034		12	1.313		12	0.993			12	1.331		12	1.637		12	1.425				2.034	1.331	1.313	1.637	0.993	1.425
	13	1.914		13	0.984		13	1.122			13	2.642		13	2.016		13	2.186				1.914	2.642	0.984	2.016	1.122	2.186
	14	1.473		14	1.115		14	1.178			14	2.427		14	1.685		14	1.894				1.473	2.427	1.115	1.685	1.178	1.894
	15	1.073		15	1.276		15	1.22			15	1.909		15	1.607		15	1.592				1.073	1.909	1.276	1.607	1.22	1.592
	16	1.56		16	1.196		16	1.259			16	2.455		16	1.644		16	1.88				1.56	2.455	1.196	1.644	1.259	1.88
	17	1.948		17	1.174		17	1.075			17	1.531		17	1.654		17	2.062				1.948	1.531	1.174	1.654	1.075	2.062
	18	1.519		18	0.983		18	1.157			18	1.732		18	2.346		18	1.75				1.519	1.732	0.983	2.346	1.157	1.75
	19	1.175		19	0.896		19	1.099			19	2.076		19	1.711		19	1.612				1.175	2.076	0.896	1.711	1.099	1.612
	20	1.524		20	1.172		20	1.037			20	2.211		20	2.029		20	2.639				1.524	2.211	1.172	2.029	1.037	2.639
	21	1.37		21	1		21	1.497			21	2.208		21	1.578		21	1.999				1.37	2.208	1	1.578	1.497	1.999
	22	1.322		22	0.878		22	1.056			22	2.434		22	1.678		22	1.703				1.322	2.434	0.878	1.678	1.056	1.703
	23	1.364		23	1.154		23	1.247			23	1.849		23	2.03		23	1.786				1.364	1.849	1.154	2.03	1.247	1.786
	24	1.053		24	1.013		24	1.39			24	1.951		24	2.052		24	2.146				1.053	1.951	1.013	2.052	1.39	2.146
	25	1.117		25	1.17		25	1.07			25	2.055		25	1.568		25	1.313				1.117	2.055	1.17	1.568	1.07	1.313
	26	1.411		26	1.054		26	1.231			26	1.882		26	1.617		26	1.581				1.411	1.882	1.054	1.617	1.231	1.581
	27	1.403		27	0.968		27	1.05			27	2.537		27	1.732		27	1.633				1.403	2.537	0.968	1.732	1.05	1.633
	28	1.416		28	1.002		28	1.21			28	2.114		28	1.4		28	2.273				1.416	2.114	1.002	1.4	1.21	2.273
	29	1.249		29	1.037		29	1.245			29	1.538		29	1.948		29	1.977				1.249	1.538	1.037	1.948	1.245	1.977
	30	1.482		30	1.039		30	1.031			30	1.236		30	1.667		30	2.307				1.482	1.236	1.039	1.667	1.031	2.307
	31	1.425		31	1.091		31	1.264			31	2.977		31	1.848		31	2.615				1.425	2.977	1.091	1.848	1.264	2.615
	32	1.316		32	1.075		32	1.3			32	1.761		32	1.692		32	2.471				1.316	1.761	1.075	1.692	1.3	2.471
	33	1.292		33	1.197		33	1.348			33	2.385		33	1.651		33	2.109				1.292	2.385	1.197	1.651	1.348	2.109
	34	1.473		34	2.432		34	1.361			34	2.248		34	2.267		34	2.258				1.473	2.248	2.432	2.267	1.361	2.258
	35	1.295		35	1.954		35	1.171			35	1.71		35	2.552		35	1.463				1.295	1.71	1.954	2.552	1.171	1.463
	36	1.381		36	1.015		36	1.159			36	2.396		36	1.649		36	2.263				1.381	2.396	1.015	1.649	1.159	2.263
	37	1.925		37	0.856		37	1.147			37	2.372		37	1.384		37	1.871				1.925	2.372	0.856	1.384	1.147	1.871
	38	1.471		38	1.194		38	1.246			38	2.034		38	1.438		38	2.586				1.471	2.034	1.194	1.438	1.246	2.586
	39	2.113		39	1.434		39	1.174			39	1.813		39	2.021		39	2.126				2.113	1.813	1.434	2.021	1.174	2.126
	40	1.429		40	1.014		40	1.345			40	2.48		40	1.394		40	2.321				1.429	2.48	1.014	1.394	1.345	2.321
	41	1.657		41	1.113		41	1.118			41	2.26		41	1.949		41	1.894				1.657	2.26	1.113	1.949	1.118	1.894
	42	1.982		42	1.21		42	0.996			42	1.293		42	1.475		42	1.71				1.982	1.293	1.21	1.475	0.996	1.71
	43	1.814		43	1.198		43	1.22			43	1.52		43	1.503		43	1.718				1.814	1.52	1.198	1.503	1.22	1.718
	44	1.441		44	0.841		44	0.883			44	2.102		44	1.682		44	1.68				1.441	2.102	0.841	1.682	0.883	1.68
	45	1.449		45	1.064		45	1.114			45	1.927		45	1.653		45	2.082				1.449	1.927	1.064	1.653	1.114	2.082
	46	1.663		46	1.08		46	1.192			46	1.707		46	2.195		46	1.96				1.663	1.707	1.08	2.195	1.192	1.96
	47	1.247		47	1.115		47	1.098			47	1.375		47	1.346		47	2.046				1.247	1.375	1.115	1.346	1.098	2.046
	48	0.873		48	1.29		48	1.033			48	1.836		48	1.908		48	1.737				0.873	1.836	1.29	1.908	1.033	1.737
	49	1.429		49	1.318		49	1.078			49	1.922		49	2.515		49	1.503				1.429	1.922	1.318	2.515	1.078	1.503
	50	1.388		50	1.225		50	0.931			50	1.234		50	2.978		50	2.007				1.388	1.234	1.225	2.978	0.931	2.007
Average		1.4595			1.14448			1.1651				2.07944			1.80928			1.89706				1.804	3.252	1.425	1.709	1.303	2.075
																						1.556	2.592	1.63	1.926	1.267	1.645
																						1.567	2.937	1.375	2.116	1.216	1.612
																						1.65	2.487	1.217		1.207	1.44
																						2.069	2.244	1.122	2.493	1.235	1.117
	wild type 2	Ick266C	Age	E14.5	Control	at least 100 cells from 1 embryo					Cilk1 KO 2		Age	E14.5	KO	at least 100 cells from 1 embryo						1.893	2.517	1.605	1.333	1.059	1.687
																						2.003	2.271	1.642	1.417	1.078	1.717
																						1.488	2.948	1.381	1.568	1.099	1.925
																						1.514	1.856	1.556	1.651	1.445	2.289
	Base	Length(um)		Mid	Length(um)		Apex	Length(um)			Base	Length(um)		Mid	Length(um)		Apex	Length(um)				1.873	2.574	1.439	2.24	1.263	1.605
	1	1.804		1	1.425		1	1.303			1	3.252		1	1.709		1	2.075				1.339	2.255	1.384	2.463	1.002	1.763
	2	1.556		2	1.63		2	1.267			2	2.592		2	1.926		2	1.645				1.415	2.616	1.417	1.648	1.21	1.436
	3	1.567		3	1.375		3	1.216			3	2.937		3	2.116		3	1.612				1.203	2.343	1.47	1.873	1.124	2.283
	4	1.65		4	1.217		4	1.207			4	2.487		4	4.011		4	1.44				1.78	2.901	1.344	2.028	0.974	1.842
	5	2.069		5	1.122		5	1.235			5	2.244		5	2.493		5	1.117				1.112	3.03	1.788	2.207	1.122	1.148
	6	1.893		6	1.605		6	1.059			6	2.517		6	1.333		6	1.687				1.802	2.148	1.393	2.105	1.242	1.795
	7	2.003		7	1.642		7	1.078			7	2.271		7	1.417		7	1.717				1.327	1.783	1.686	1.11	1.098	1.65
	8	1.488		8	1.381		8	1.099			8	2.948		8	1.568		8	1.925				1.402	2.085	1.441	1.483	1.02	2.213
	9	1.514		9	1.556		9	1.445			9	1.856		9	1.651		9	2.289				1.412	1.933	1.115	2.066	1.142	1.849
	10	1.873		10	1.439		10	1.263			10	2.574		10	2.24		10	1.605				1.477	2.479	1.722	1.52	1.18	1.705
	11	1.339		11	1.384		11	1.002			11	2.255		11	2.463		11	1.763				1.442	2.962	2.292	2.253	1.151	2.171
	12	1.415		12	1.417		12	1.21			12	2.616		12	1.648		12	1.436				1.257	2.564	1.338	1.557	1.105	2.027
	13	1.203		13	1.47		13	1.124			13	2.343		13	1.873		13	2.283				2.004	1.964	1.61	1.671	1.238	1.66
	14	1.78		14	1.344		14	0.974			14	2.901		14	2.028		14	1.842				1.8	2.078	1.27	2.077	1.156	1.218
	15	1.112		15	1.788		15	1.122			15	3.03		15	2.207		15	1.148				2.048	2.344	1.444	2.182	1.139	1.857
	16	1.802		16	1.393		16	1.242			16	2.148		16	2.105		16	1.795				2.209	2.555	1.448	1.71	1.165	1.792
	17	1.327		17	1.686		17	1.098			17	1.783		17	1.11		17	1.65				1.291	1.685	1.185	2.013	1.253	1.498
	18	1.402		18	1.441		18	1.02			18	2.085		18	1.483		18	2.213				1.253	2.534	1.42	1.516	1.219	1.618
	19	1.412		19	1.115		19	1.142			19	1.933		19	2.066		19	1.849				2.159	2.832	1.413	1.581	1.081	1.372
	20	1.477		20	1.722		20	1.18			20	2.479		20	1.52		20	1.705				1.608	2.595	1.604	1.943	1.161	1.714
	21	1.442		21	2.292		21	1.151			21	2.962		21	2.253		21	2.171				1.722	2.718	1.507	2.072	1.048	1.977
	22	1.257		22	1.338		22	1.105			22	2.564		22	1.557		22	2.027				2.19	2.463	1.246	1.495	1.252	1.482
	23	2.004		23	1.61		23	1.238			23	1.964		23	1.671		23	1.66				1.444	2.307	1.617	1.54	1.089	1.805
	24	1.8		24	1.27		24	1.156			24	2.078		24	2.077		24	1.218				1.139	1.915	1.155	1.554	1.143	2.032
	25	2.048		25	1.444		25	1.139			25	2.344		25	2.182		25	1.857				1.75	2.417	1.276	1.264	1.055	2.638
	26	2.209		26	1.448		26	1.165			26	2.555		26	1.71		26	1.792				1.522	2.807	1.684	1.941	1.055	2.297
	27	1.291		27	1.185		27	1.253			27	1.685		27	2.013		27	1.498				1.973	3.197	1.521	1.711	1.088	1.913
	28	1.253		28	1.42		28	1.219			28	2.534		28	1.516		28	1.618				1.907	2.156	1.53	1.969	1.094	1.508
	29	2.159		29	1.413		29	1.081			29	2.832		29	1.581		29	1.372				1.112	3.131	1.765	1.796	1.107	2.203
	30	1.608		30	1.604		30	1.161			30	2.595		30	1.943		30	1.714				1.001	3.074	1.528	1.705	0.983	2.194
	31	1.722		31	1.507		31	1.048			31	2.718		31	2.072		31	1.977				1.57	2.043	1.179	1.967	1.146	1.781
	32	2.19		32	1.246		32	1.252			32	2.463		32	1.495		32	1.482				1.058	3.091	1.318	1.342	1.152	1.717
	33	1.444		33	1.617		33	1.089			33	2.307		33	1.54		33	1.805				1.586	2.515	1.502	2.163	1.003	2.057
	34	1.139		34	1.155		34	1.143			34	1.915		34	1.554		34	2.032				1.172	2.742	1.213	1.846	1.275	2.086
	35	1.75		35	1.276		35	1.055			35	2.417		35	1.264		35	2.638				1.096	2.889	1.445	1.813	1.229	2.359
	36	1.522		36	1.684		36	1.055			36	2.807		36	1.941		36	2.297				1.358	1.809	1.288	1.819	0.915	2.579
	37	1.973		37	1.521		37	1.088			37	3.197		37	1.711		37	1.913				1.093	2.285	1.423	1.961	1.236	1.961
	38	1.907		38	1.53		38	1.094			38	2.156		38	1.969		38	1.508				1.003	3.238	1.683	1.601	1.147	1.819
	39	1.112		39	1.765		39	1.107			39	3.131		39	1.796		39	2.203				1.202	3.271	1.719	1.51	1.396	1.91
	40	1.001		40	1.528		40	0.983			40	3.074		40	1.705		40	2.194				0.957	1.396	1.423	2.025	1.147	1.632
	41	1.57		41	1.179		41	1.146			41	2.043		41	1.967		41	1.781				0.82	2.032	1.095	2.367	1.424	1.746
	42	1.058		42	1.318		42	1.152			42	3.091		42	1.342		42	1.717				0.87	2.472	1.225	2.079	1.162	1.842
	43	1.586		43	1.502		43	1.003			43	2.515		43	2.163		43	2.057				1.47	2.162	1.294	2.064	1.194	1.625
	44	1.172		44	1.213		44	1.275			44	2.742		44	1.846		44	2.086				1.423	2.053	0.999	1.893	1.302	1.941
	45	1.096		45	1.445		45	1.229			45	2.889		45	1.813		45	2.359				1.489	2.064	1.198	2.115	1.039	1.729
	46	1.358		46	1.288		46	0.915			46	1.809		46	1.819		46	2.579				1.339	1.66	1.159	2.452	1.398	1.507
	47	1.093		47	1.423		47	1.236			47	2.285		47	1.961		47	1.961				1.188	1.823	0.933	1.451	1.221	1.966
	48	1.003		48	1.683		48	1.147			48	3.238		48	1.601		48	1.819				1.293	1.825	1.053	2.339	1.116	1.363
	49	1.202		49	1.719		49	1.396			49	3.271		49	1.51		49	1.91				1.482	1.658	1.33	2.071	1.177	1.696
	50	0.957		50	1.423		50	1.147			50	1.396		50	2.025		50	1.632				1.443	2.392	1.051	1.893	1.159	1.536
Average		1.53224			1.46396			1.15028				2.49656			1.85128			1.83346				1.651	1.637	1.215	2.31	0.895	2.22
																						1.471	1.549	1.114	1.998	1.203	1.595
																						1.56	1.818	0.798	2.192	0.798	1.716
																						1.555	1.854	0.9	1.609	1.019	1.884
	wild type 3										Cilk1 KO 3		Age	E14.5	KO	at least 100 cells from 1 embryo						1.318	1.585	1.049	2.053	0.998	1.85
																						1.568	1.563	0.961	1.771	0.941	2.045
	Base	Length(um)		Mid	Length(um)		Apex	Length(um)			Base	Length(um)		Mid	Length(um)		Apex	Length(um)				1.278	1.55	1.083	2.304	0.656	1.341
	1	0.82		1	1.095		1	1.424			1	2.032		1	2.367		1	1.746				1.436	2.15	0.984	2.338	0.788	1.474
	2	0.87		2	1.225		2	1.162			2	2.472		2	2.079		2	1.842				1.462	1.689	0.892	2.069	1.032	1.745
	3	1.47		3	1.294		3	1.194			3	2.162		3	2.064		3	1.625				1.74	1.426	1.358	1.575	1.235	1.527
	4	1.423		4	0.999		4	1.302			4	2.053		4	1.893		4	1.941				1.473	1.818	1.068	2.136	0.978	1.449
	5	1.489		5	1.198		5	1.039			5	2.064		5	2.115		5	1.729				1.335	1.877	1.125	2.435	1.055	1.562
	6	1.339		6	1.159		6	1.398			6	1.66		6	2.452		6	1.507				1.717	2.326	1.273		0.865	1.594
	7	1.188		7	0.933		7	1.221			7	1.823		7	1.451		7	1.966				1.591	2.172	1.151	2.143	0.979	1.626
	8	1.293		8	1.053		8	1.116			8	1.825		8	2.339		8	1.363				1.466	1.562	1.079	1.749	1.247	2.061
	9	1.482		9	1.33		9	1.177			9	1.658		9	2.071		9	1.696				1.735	1.843	0.863	2.449	1.033	1.654
	10	1.443		10	1.051		10	1.159			10	2.392		10	1.893		10	1.536				1.487	2.141	0.81	1.651	1.208	1.555
	11	1.651		11	1.215		11	0.895			11	1.637		11	2.31		11	2.22				1.442	1.699	0.857	2.177	1.198	1.303
	12	1.471		12	1.114		12	1.203			12	1.549		12	1.998		12	1.595				1.625	2.777	1.226	1.707	1.229	1.966
	13	1.56		13	0.798		13	0.798			13	1.818		13	2.192		13	1.716				1.61	2.118	1.108	2.087	0.979	2.324
	14	1.555		14	0.9		14	1.019			14	1.854		14	1.609		14	1.884				1.26	2.387	1.592	1.614	1.064	1.701
	15	1.318		15	1.049		15	0.998			15	1.585		15	2.053		15	1.85				1.553	1.713	1.347	1.511	1.16	1.372
	16	1.568		16	0.961		16	0.941			16	1.563		16	1.771		16	2.045				1.707	1.591	1.57	2.276	1.116	1.925
	17	1.278		17	1.083		17	0.656			17	1.55		17	2.304		17	1.341				1.565	1.76	1.268	1.66	1.074	1.483
	18	1.436		18	0.984		18	0.788			18	2.15		18	2.338		18	1.474				1.694	1.568	1.151	2.263	1.229	1.454
	19	1.462		19	0.892		19	1.032			19	1.689		19	2.069		19	1.745				1.946	1.601	0.983	1.964	1.297	1.505
	20	1.74		20	1.358		20	1.235			20	1.426		20	1.575		20	1.527				2.05	1.556	1.219	1.55	1.034	1.601
	21	1.473		21	1.068		21	0.978			21	1.818		21	2.136		21	1.449				1.395	2.808	1.192	1.528	1.272	2.33
	22	1.335		22	1.125		22	1.055			22	1.877		22	2.435		22	1.562				1.004	2.471	1.218	1.863	1.385	1.795
	23	1.717		23	1.273		23	0.865			23	2.326		23	3.722		23	1.594				1.295	2.272	1.15	1.687	1.242	1.569
	24	1.591		24	1.151		24	0.979			24	2.172		24	2.143		24	1.626				1.308	2.391	1.223	1.761	1.26	1.666
	25	1.466		25	1.079		25	1.247			25	1.562		25	1.749		25	2.061				1.194	1.471	1.009	1.757	1.335	1.864
	26	1.735		26	0.863		26	1.033			26	1.843		26	2.449		26	1.654				1.412	1.738	1.145	1.655	1.058	1.581
	27	1.487		27	0.81		27	1.208			27	2.141		27	1.651		27	1.555				1.447	1.625	0.925	2.058	1.229	2.033
	28	1.442		28	0.857		28	1.198			28	1.699		28	2.177		28	1.303				1.584	1.211	1.351	2.028	1.207	1.203
	29	1.625		29	1.226		29	1.229			29	2.777		29	1.707		29	1.966				1.857	1.591	1.235	1.919	1.043	1.504
	30	1.61		30	1.108		30	0.979			30	2.118		30	2.087		30	2.324				1.918	1.507	1.135	1.61	1.166	1.651
	31	1.26		31	1.592		31	1.064			31	2.387		31	1.614		31	1.701				1.408	1.653	0.985	1.749	1.268	1.763
	32	1.553		32	1.347		32	1.16			32	1.713		32	1.511		32	1.372				1.43	1.792	1.23	1.988	1.083	1.595
	33	1.707		33	1.57		33	1.116			33	1.591		33	2.276		33	1.925				2.183	2.186	1.343	1.548	1.44	1.904
	34	1.565		34	1.268		34	1.074			34	1.76		34	1.66		34	1.483			Average	1.49423	2.15325	1.24629	1.85461	1.14839	1.80978
	35	1.694		35	1.151		35	1.229			35	1.568		35	2.263		35	1.454			STDEV	0.292576	0.503495	0.266391	0.318041	0.155776	0.325004
	36	1.946		36	0.983		36	1.297			36	1.601		36	1.964		36	1.505
	37	2.05		37	1.219		37	1.034			37	1.556		37	1.55		37	1.601					Control	cilk1KO
	38	1.395		38	1.192		38	1.272			38	2.808		38	1.528		38	2.33				Base	1.49423	2.15325		Base	0.292576	0.503495
	39	1.004		39	1.218		39	1.385			39	2.471		39	1.863		39	1.795				Mid	1.24629	1.85461		Mid	0.266391	0.318041
	40	1.295		40	1.15		40	1.242			40	2.272		40	1.687		40	1.569				Apex	1.14839	1.80978		Apex	0.155776	0.325004
	41	1.308		41	1.223		41	1.26			41	2.391		41	1.761		41	1.666
	42	1.194		42	1.009		42	1.335			42	1.471		42	1.757		42	1.864
	43	1.412		43	1.145		43	1.058			43	1.738		43	1.655		43	1.581
	44	1.447		44	0.925		44	1.229			44	1.625		44	2.058		44	2.033
	45	1.584		45	1.351		45	1.207			45	1.211		45	2.028		45	1.203
	46	1.857		46	1.235		46	1.043			46	1.591		46	1.919		46	1.504
	47	1.918		47	1.135		47	1.166			47	1.507		47	1.61		47	1.651
	48	1.408		48	0.985		48	1.268			48	1.653		48	1.749		48	1.763
	49	1.43		49	1.23		49	1.083			49	1.792		49	1.988		49	1.595
	50	2.183		50	1.343		50	1.44			50	2.186		50	1.548		50	1.904
		1.49094			1.13044			1.1298				1.88374			1.98376			1.69882

## Sheet: Cilk1_ciliated cells
	0.1	0.5	0.9
NUMBER OF CILIATED CELLS	0.84153	0.72619	0.607143
	0.807487	0.723214	0.647059
	0.816176	0.754717	0.609375
AVERAGE	0.821731	0.734707	0.621192
STDEV	0.0176884	0.0173927	0.0224289

## Sheet: Tbc1d32_length + ciliated cells
	B153 control
			0.1				0.5				0.9
		Ciliary length	Number of ciliated cell			Ciliary length	Number of ciliated cell			Ciliary length	Number of ciliated cell
	1	0.126	0.981481		1	0.094	0.980676		1	0.051	0.983673
	2	0.122			2	0.101			2	0.053
	3	0.102			3	0.089			3	0.051
	4	0.112			4	0.094			4	0.048
	5	0.087			5	0.079			5	0.038
	6	0.117			6	0.101			6	0.058
	7	0.101			7	0.095			7	0.047
	8	0.108			8	0.096			8	0.044
	9	0.139			9	0.101			9	0.04
	10	0.102			10	0.105			10	0.04
	11	0.094			11	0.083			11	0.055
	12	0.158			12	0.108			12	0.063
	13	0.117			13	0.098			13	0.066
	14	0.093			14	0.09			14	0.056
	15	0.083			15	0.096			15	0.057
	16	0.12			16	0.107			16	0.048
	17	0.113			17	0.09			17	0.054
	18	0.098			18	0.096			18	0.061
	19	0.107			19	0.091			19	0.048
	20	0.127			20	0.114			20	0.04
	21	0.133			21	0.089			21	0.066
	22	0.142			22	0.089			22	0.048
	23	0.122			23	0.092			23	0.05
	24	0.125			24	0.083			24	0.058
	25	0.122			25	0.094			25	0.058
	26	0.124			26	0.077			26	0.061
	27	0.109			27	0.086			27	0.061
	28	0.127			28	0.08			28	0.04
	29	0.149			29	0.094			29	0.052
	30	0.097			30	0.092			30	0.059
	B153 mutant
		Ciliary length	Number of ciliated cell			Ciliary length	Number of ciliated cell			Ciliary length	Number of ciliated cell
	1	0.048	0.118557		1	0.078	0.0967742		1
	2	0.052			2	0.074			2
	3	0.088			3	0.08			3
	4	0.066			4	0.089			4
	5	0.043			5	0.072			5
	6	0.053			6	0.084			6
	7	0.041			7	0.062			7
	8	0.061			8	0.059			8
	9	0.052			9	0.05			9
	10	0.049			10	0.062			10
	11	0.062			11	0.087			11
	12	0.056			12	0.066			12
	13	0.054			13	0.047			13
	14	0.073			14				14
	15				15				15
	B158 control
			0.1				0.5				0.9
		Ciliary length	Number of ciliated cell			Ciliary length	Number of ciliated cell			Ciliary length	Number of ciliated cell
	1	0.144	0.964072		1	0.117	0.996885		1	0.105	0.995238
	2	0.119			2	0.096			2	0.093
	3	0.109			3	0.117			3	0.089
	4	0.077			4	0.117			4	0.08
	5	0.09			5	0.101			5	0.088
	6	0.114			6	0.11			6	0.065
	7	0.117			7	0.108			7	0.099
	8	0.101			8	0.096			8	0.085
	9	0.097			9	0.112			9	0.084
	10	0.128			10	0.115			10	0.08
	11	0.13			11	0.113			11	0.082
	12	0.158			12	0.083			12	0.111
	13	0.134			13	0.096			13	0.118
	14	0.141			14	0.106			14	0.098
	15	0.161			15	0.114			15	0.093
	16	0.096			16	0.121			16	0.107
	17	0.143			17	0.105			17	0.097
	18	0.118			18	0.125			18	0.095
	19	0.14			19	0.11			19	0.086
	20	0.124			20	0.109			20	0.092
	21	0.142			21	0.097			21	0.103
	22	0.135			22	0.11			22	0.097
	23	0.134			23	0.111			23	0.103
	24	0.145			24	0.104			24	0.108
	25	0.165			25	0.089			25	0.117
	26	0.144			26	0.086			26	0.093
	27	0.133			27	0.096			27	0.093
	28	0.137			28	0.072			28	0.103
	29	0.123			29	0.072			29	0.102
	30	0.106			30	0.088			30	0.094
	B158 mutant
		Ciliary length	Number of ciliated cell			Ciliary length	Number of ciliated cell			Ciliary length	Number of ciliated cell
	1	0.06	0.105		1	0.079	0.104396		1	0.081	0.078125
	2	0.103			2	0.073			2	0.078
	3	0.034			3	0.058			3	0.096
	4	0.017			4	0.02			4	0.082
	5	0.013			5	0.023			5	0.082
	6	0.082			6	0.126			6	0.04
	7	0.065			7	0.07			7	0.067
	8	0.083			8	0.056			8	0.017
	9	0.087			9	0.101			9	0.017
	10	0.061			10	0.134			10	0.029
	11	0.031			11	0.126			11	0.032
	12	0.088			12	0.034			12	0.034
	13	0.096			13	0.038			13	0.022
	14	0.038			14	0.101			14	0.028
	15	0.018			15	0.083			15	0.033
	16	0.027				0.042				0.008
	17	0.085				0.027
						0.049
	B195 control
		Ciliary length	Number of ciliated cell			Ciliary length	Number of ciliated cell			Ciliary length	Number of ciliated cell
	1	0.137	0.960526		1	0.087	0.986842		1	0.077	0.988764
	2	0.146			2	0.101			2	0.077
	3	0.081			3	0.092			3	0.068
	4	0.106			4	0.105			4	0.089
	5	0.117			5	0.107			5	0.067
	6	0.14			6	0.09			6	0.104
	7	0.131			7	0.094			7	0.113
	8	0.09			8	0.123			8	0.089
	9	0.125			9	0.112			9	0.105
	10	0.128			10	0.096			10	0.07
	11	0.133			11	0.104			11	0.079
	12	0.156			12	0.08			12	0.101
	13	0.152			13	0.089			13	0.066
	14	0.145			14	0.099			14	0.078
	15	0.15			15	0.09			15	0.093
	16	0.139			16	0.092			16	0.092
	17	0.129			17	0.124			17	0.098
	18	0.131			18	0.111			18	0.112
	19	0.12			19	0.121			19	0.106
	20	0.146			20	0.112			20	0.1
	21	0.114			21	0.082			21	0.084
	22	0.136			22	0.097			22	0.101
	23	0.114			23	0.077			23	0.096
	24	0.124			24	0.072			24	0.095
	25	0.08			25	0.094			25	0.116
	26	0.117			26	0.109			26	0.116
	27	0.104			27	0.105			27	0.088
	28	0.117			28	0.125			28	0.118
	29	0.16			29	0.104			29	0.107
	30	0.127			30	0.089			30	0.16
	B195 mutant
		Ciliary length	Number of ciliated cell			Ciliary length	Number of ciliated cell			Ciliary length	Number of ciliated cell
	1	0.12	0.0598802		1	0.113	0.0392157		1	0.082	0.062069
	2	0.143			2	0.072			2	0.057
	3	0.183			3	0.042			3	0.081
	4	0.171			4	0.061			4	0.103
	5	0.1			5	0.109			5	0.087
	6	0.081			6	0.043			6	0.093
	7	0.057			7				7	0.104
	8	0.141			8				8	0.088
	9	0.111			9				9
	10
	11
	12
	13
	14
	15
	16
	17
	Base		Mid		Apex
	Control	bromi	Control	bromi	Control	bromi
	0.981481	0.118557	0.980676	0.0967742	0.983673	0
	0.964072	0.105	0.996885	0.104396	0.995238	0.078125
	0.960526	0.0598802	0.986842	0.0392157	0.988764	0.062069
	Cilia length				Ciliated cell ratio
		Conrol	Bromi			Conrol	Bromi
	Base	0.123067	0.072325		Base	0.968693	0.094479
	Mid	0.0987	0.07		Mid	0.988134	0.0801285
	Apex	0.0810667	0.0600417		Apex	0.989225	0.070097
	Cilia length STDEV				Ciliated cell ratio STDEV
		Conrol	Bromi			Conrol	Bromi
	Base	0.0203998	0.039369		Base	0.0112159	0.0307205
	Mid	0.0128478	0.0289559		Mid	0.00818111	0.0356359
	Apex	0.0246475	0.0314981		Apex	0.00579609	0.0113533

## Sheet: Ift88_ciliated cells
	0.1	0.5	0.9
NUMBER OF CILIATED CELLS	0.0322581	0.0340909	0.0642857
	0.0285714	0.0138889	0.0973451
	0.0285714	0.0097561	0.103896
AVERAGE	0.0298003	0.0192453	0.088509
STDEV	0.00212848	0.0130217	0.0212321
