# Supplementary material for: Dysregulation of sonic hedgehog signaling causes hearing loss in ciliopathy mouse models
Source: eLife. 2020 Dec 31;9:e56551. doi: 10.7554/eLife.56551 (PMC7806262; doi:10.7554/eLife.56551)
Supplement: Figure 5—figure supplement 1—source data 1. [file elife-56551-fig5-figsupp1-data1.xlsx]

## Sheet: wild type
		Figure 5-figure supplement 1-A							Figure 5-figure supplement 1-B							Figure 5-figure supplement 1-C
	wild type
	Base							Mid							Apex
	Deviation	IHC	OHC1	OHC2	OHC3			Deviation	IHC	OHC1	OHC2	OHC3			Deviation	IHC	OHC1	OHC2	OHC3
	1	-1.081	18.307	-7.958	-2.99			1	1.27	-1.674	-0.49	-71.526			1	-30.811	28.803	-38.884	-32.005
	2	7.458	7.101	-0.261	24.603			2	19.478	-12.642	1.835	-19.577			2	-33.721	-40.27	-17.047	-30.75
	3	-5.113	6.436	16.027	1.871			3	-27.732	10.92	5.376	-43.456			3	-51.429	-41.565	3.045	-34.145
	4	-3.137	4.087	16.884	-13.908			4	-7.044	11.063	-19.487	-19.589			4	-40.43	8.77	-21.735	-46.72
	5	-5.918	-11.207	-7.875	-3.058			5	-0.3	-23.307	-10.246	-40.18			5	-23.59	-6.828	-8.04	-39.568
	6	-1.898	-1.197	-2.411	3.314			6	-0.662	0.488	-6.176	-39.734			6	-24.699	-3.378	-22.907	-58.239
	7	-0.564	2.694	0.843	-6.023			7	4.563	-23.113	17.219	-17.736			7	10.751	-15.574	-8.491	-25.871
	8	-10.441	20.846	-1.103	-6.278			8	-14.017	0.129	12.579	20.956			8	1.983	-49.757	-50.74	-20.507
	9	19.566	22.031	12.534	60.723			9	-6.47	-2.895	-0.422	-50.887			9	-24.005	11.425	-23.326	-33.229
	10	-10.305	5.124	-4.086	-41.607			10	2.556	-17.376	-2.386	-29.019			10	-29.599	-6.171	-50.853	-28.302
	11	-0.497	19.783	7.397	-11.854			11	-28.508		-6.394	-46.339			11	26.146	10.472	-26.8	-36.847
	12	8.543	3.614	12.529	4.399			12	-11.836						12	-36.365	-6.751		-60.077
	13	-1.102	5.711	11.335	5.121			13	-17.318	0.962	-20.187	-22.058			13	-2.995	-15.906
	14	-8.488	12.529	11.279	16.928			14	-2.993	-2.788	1.968	24.85			14	2.974	6.282	-9.462	-13.355
	15	9.896	-0.255	-0.126	6.221			15	-32.658	22.086	1.221	-21.44			15	-23.24	-62.073	-28.225	-26.565
	16	0.674	-0.2645	0.666	13.427			16	-25.895	-11.937	2.77	-8.304			16	16.07	-26.565	24.747	-0.465
	17	-6.34	15.329	18.435	23.199			17	-7.196	-21.302	17.858	-48.645			17	1.123	-36.87	8.727	-14.71
	18	0.744	-0.597	18.435	10.725			18	-1.677	-17.375	17.266	-32.443			18	-5.206	-22.107	-7.125	-28.072
	19	0.725	-1.771	-0.48	-1.181			19	-32.232	14.634	3.798	-13.355			19	11.31	-0.565	-5.194	-21.801
	20	-11.906	-0.458	4.764	5.194			20	8.09	-9.997	19.964	-20.217			20	-1.637	-23.199	-7.417	-18.622
	21	0.63	0.63	5.838	-5.711			21	-3.796	-4.253	-35.914	-4.951			21	6.34	-8.13	17.114	-27.35
	22	-20.821	-0.268	-21.62	20.556			22	-12.601	-30.256	-18.721	-10.844			22	-28.796	1.863	-30.47	-13.42
	23	-17.354	14.036	-1.897	-12.041			23		7.371		-11.411			23	-7.442	-15.353	15.05	-41.987
	24	-1.548	-0.754	-12.56	23.378			24	11.452	-1.848	2.779	-16.211			24	24.793	47.261	17.148	-25.735
	25	-0.266	-6.69	-8.437	-6.18			25	-5.332	19.128	6.643	-32.372			25	29.578	11.051	2.246	-18.435
	26	5.642	-5.639	-1.776	-0.168			26	2.666	16.636	1.008	-40.301			26	24.231	11.17	-5.169	-37.558
	27	-0.184	4.316	-0.126	15.255			27	-13.285	10.061	-3.4	-36.02			27	14.655	26.134	-10.235	-25.292
	28	-10.305	-11.31	-0.549	38.66			28	15.596	22.346	10.376	-38.679			28	-3.642	-21.501	-14.143	-39.936
	29	0.387	-4.764	9.993	0.498			29	15.108	14.701	2.166	-13.641			29	17.237	-12.773	-13.729	-32.638
	30	-4.794	-13.407	-12.995	-0.495			30	-0.939	11.914	23.986	-36.353			30				-49.399
	31		-12.529	-8.13	1.494			31	-0.716	15.945	-6.307	-47.083			31				-34.434
	32		0.678		-8.379			32	4.191	4.394	18.619	-34.638			32	-41.583	-23.824	1.332	24.998
	33	26.565	-0.268	-10.305	-7.125			33	-5.029	22.099	24.944	-37.931			33	-33.332	-16.991	-20.722	-35.625
	34	-4.764	-0.158	-11.31	-8.13			34	14.164	5.194	-17.026	-56.31			34	-5.194	-23.463	-0.434	15.124
	35	17.838	-6.937	19.125	-9.592			35		5.711	-5.784	-38.704			35	-31.734	-15.141	-5.111	24.775
	36	3.576	-5.194	-26.565	-14.983			36		12.529		-34.117			36	-60.397	-30.893	10.459	-33.36
	37	12.002	10.684	-15.775	-0.165			37	-18.547	-17.613	-2.726	-35.272			37	-45.7	-2.627	-12.529	32.335
	38	18.852	0.955	-5.829	21.59			38	-28.383	-26.565	11.06	-49.611			38	-18.783	-8.219	-5.908	4.512
	39	-0.1998	-10.88	-6.903	6.948			39	-25.252	25.791	-22.346	-36.87			39	-32.017	-2.771	2.408	32.681
	40	1.312	-10.435	-2.511	17.278			40	-18.142	17.374	-17.103	-26.93			40	-23.381	-8.94	14.357	-3.721
	41	23.384	-3.362	-32.304	-0.465			41	-13.575	15.133	7.919	-47.337			41	-13.85	6.684	25.697	32.082
	42	-5.176	-13.891	-4.764	-5.237			42	-22.712	-2.203	-11.143	-28.785			42	9.776	-24.775	-9.162	1.909
	43		-11.764	-24.996	1.863			43	-19.975	-16.843	-19.637	-26.305			43	-21.801	1.754	-1.254	15.296
	44	2.531	-0.298	6.911	0.543			44	-25.222	-2.454	-14.813	-31.379			44		-13.057	4.014	11.414
	45	1.048	17.135	14.273	-39.067			45	-26.038	19.422	-2.806	-8.043			45		-21.038	-4.351	-7.595
	46	10.749	-2.663	0.559	-23.129			46	-10.748	10.892	16.049	-40.173			46		-16.398	-2.517	-22.62
	47	2.552	-2.468	-3.145	-34.689			47		-7.222	47.339	-36.902			47			-0.465	0.451
	48	11.813	-1.975	-3.338	-24.9			48		-8.983	-6.216	-41.507			48				-6.563
	49	4.399	-1.364	-10.439	-14.239			49		-8.715	-2.224	-36.181			49				14.176
	50	15.238	-1.469	-2.553	-34.785			50		-13.431	-6.599	-53.949			50				19.467
	51	27.614	-7.125	-9.636	-7.125			51	-0.165	-2.603	-3.18	18.652			51				5.932
	52	11.31	-1.081	-1.697	-27.02			52	-3.814	-2.291	-1.469	12.095			52	-17.723	-2.215	-1.005	4.399
	53	19.983	-1.931	-9.936	-20.556			53	-0.971	-1.488	-12.041	4.086			53	-5.459	-26.241	-14.036	-14.47
	54	21.801	-7.726	-13.023	-12.205			54	-4.243	-12.351	-5.393	11.504			54	-19.805	-6.715	-7.572	-7.399
	55	12.444	-8.796	-18.901	-23.535			55	-9.819	-3.545	-5.688	0.466			55	2.826	9.572	-12.858	4.537
	56		-14.518	-20.556	-16.346			56	-12.095	-9.462	-13.529	-6.516			56	7.972	-18.935	3.033	-26.565
	57		-9.462	-7.125				57	0.61	0.477	-11.31	9.709			57	-16.148	10.69	1.61	0.675
	58	-9.978	1.229	-7.125	0.367			58	-2.427	-9.462	8.746	-2.337			58	-10.125	-19.299	-3.19	29.274
	59	-16.028	-2.843	-5.711	-7.261			59	-0.165	4.764	0.963	23.236			59	2.631	-14.58	-7.253	4.044
	60	-10.513	-5.62	-0.091	-12.923			60	-14.931	-13.089	-3.378	11.371			60	26.271	-9.599	16.147	-24.146
	61	-2.056	1.032	-18.646	-1.652			61	-3.167	7.226	5.819	10.574			61	-7.333	11.36	16.423	9.416
	62	-7.524	2.068	-18.651	-5.084			62	-2.394	-2.176	5.819	10.631			62	-18.647	2.876	-3.24	5.457
	63	-15.11	0.641	-28.117	3.917			63	-0.579	-6.691	-5.81	8.734			63	-20.466	12.283	-1.652	-1.245
	64	-6.936	2.249	-10.339	-18.798			64	-20.481	-16.572	-0.225	-3.487			64			0.507
	65	-0.494	-12.203	12.691	-8.365			65	11.01	9.926	20.695	33.591			Total count	53	56	56	62
	66	13.066	-17.557	-7.382	-3.412			66	7.675	2.325	3.18	28.74
	67	0.494	17.32	-7.822	4.683			67	29.651	2.22	23.164	50.79
	68		9.486	-12.962	-8.13			68	-4.097	5.511	13.594	48.18
	69		6.001		-0.49			69	8.367	13.368	7.44	23.514
	70				-1.169			70	8.264	5.65	10.83	37.926
	71	5.932	-1.081	-3.814	-7.452			71	0.915	8.754	3.129	30.53
	72	-2.291	12.955	-0.955	12.933			72	-0.151	-5.092	-1.051	43.192
	73	-5.805	-4.399	2.896	1.128			73	1.248	-2.862	14.644	39.758
	74	-0.168	16.546	-1.863	8.07			74	7.198	4.749	9.776	58.165
	75	3.909	-0.268	-2.106	16.274			75	7.14	-1.364	4.529	-7.359
	76	-9.927	0.521	-6.017	3.814			76	8.746	13.59	16.699	32.077
	77	-2.84	11.522	-11.054	1.562			77	-5.975	1.071	17.963	55.1
	78	-11.492	1.123	3.744	4.764			78				30.283
	79	-3.442	4.438	1.591	8.746			Total count	70	75	74	77
	80	-13.306	5.576	-7.212	16.959
	81	10.883	-12.301	0.074	6.444
	82	-2.916	-8.873	-0.935	-2.389
	83		-0.688		-2.069
	Total count	74	82	79	82
	Count							Count							Count
	Range	IHC	OHC1	OHC2	OHC3			Range	IHC	OHC1	OHC2	OHC3			Range	IHC	OHC1	OHC2	OHC3
	"-180< ~ <= -150"	0	0	0	0			"-180< ~ <= -150"	0	0	0	0			"-180< ~ <= -150"	0	0	0	0
	"-150< ~ <=-120"	0	0	0	0			"-150< ~ <=-120"	0	0	0	0			"-150< ~ <=-120"	0	0	0	0
	"-120<= ~ <-90"	0	0	0	0			"-120<= ~ <-90"	0	0	0	0			"-120<= ~ <-90"	0	0	0	0
	"-90<= ~ <-60"	0	0	0	0			"-90<= ~ <-60"	0	0	0	1			"-90<= ~ <-60"	1	1	0	1
	"-60<= ~ <-30"	0	0	1	4			"-60<= ~ <-30"	2	1	1	28			"-60<= ~ <-30"	10	5	4	16
	"-30<= ~ <0"	40	47	55	42			"-30<= ~ <0"	46	36	34	22			"-30<= ~ <0"	24	33	34	24
	"0<= ~ <30"	34	35	23	34			"0<= ~ <30"	22	38	38	15			"0<= ~ <30"	18	16	18	18
	"30< ~ <=60"	0	0	0	1			"30< ~ <=60"	0	0	1	11			"30< ~ <=60"	0	1	0	3
	"60< ~ <=90"	0	0	0	1			"60< ~ <=90"	0	0	0	0		mid	"60< ~ <=90"	0	0	0	0							Apex
	"90< ~ <=120"	0	0	0	0			"90< ~ <=120"	0	0	0	0			"90< ~ <=120"	0	0	0	0
	"120< ~ <=150"	0	0	0	0			"120< ~ <=150"	0	0	0	0			"120< ~ <=150"	0	0	0	0
	"150< ~ <=180"	0	0	0	0			"150< ~ <=180"	0	0	0	0			"150< ~ <=180"	0	0	0	0
	total	74	82	79	82			total	70	75	74	77			total count	53	56	56	62
	Count							Count							Count
	Range	IHC	OHC1	OHC2	OHC3			Range	IHC	OHC1	OHC2	OHC3			Range	IHC	OHC1	OHC2	OHC3
	"-180< ~ <= -150"	0	0	0	0			"-180< ~ <= -150"	0	0	0	0			"-180< ~ <= -150"	0	0	0	0
	"-150< ~ <=-120"	0	0	0	0			"-150< ~ <=-120"	0	0	0	0			"-150< ~ <=-120"	0	0	0	0
	"-120<= ~ <-90"	0	0	0	0			"-120<= ~ <-90"	0	0	0	0			"-120<= ~ <-90"	0	0	0	0
	"-90<= ~ <-60"	0	0	0	0			"-90<= ~ <-60"	0	0	0	0.012987			"-90<= ~ <-60"	0.0188679	0.0178571	0	0.016129
	"-60<= ~ <-30"	0	0	0.0126582	0.0487805			"-60<= ~ <-30"	0.0285714	0.0133333	0.0135135	0.363636			"-60<= ~ <-30"	0.188679	0.0892857	0.0714286	0.258065
	"-30<= ~ <0"	0.540541	0.573171	0.696203	0.512195			"-30<= ~ <0"	0.657143	0.48	0.459459	0.285714			"-30<= ~ <0"	0.45283	0.589286	0.607143	0.387097
	"0<= ~ <30"	0.459459	0.426829	0.291139	0.414634			"0<= ~ <30"	0.314286	0.506667	0.513514	0.194805			"0<= ~ <30"	0.339623	0.285714	0.321429	0.290323
	"30< ~ <=60"	0	0	0	0.0121951			"30< ~ <=60"	0	0	0.0135135	0.142857			"30< ~ <=60"	0	0.0178571	0	0.0483871
	"60< ~ <=90"	0	0	0	0.0121951			"60< ~ <=90"	0	0	0	0			"60< ~ <=90"	0	0	0	0
	"90< ~ <=120"	0	0	0	0			"90< ~ <=120"	0	0	0	0			"90< ~ <=120"	0	0	0	0
	"120< ~ <=150"	0	0	0	0			"120< ~ <=150"	0	0	0	0			"120< ~ <=150"	0	0	0	0
	"150< ~ <=180"	0	0	0	0			"150< ~ <=180"	0	0	0	0			"150< ~ <=180"	0	0	0	0
	total	1	1	1	1			total	1	1	1	1			total count	1	1	1	1
									0.0285714	0.0133333	0.027027	0.519481				0.207547	0.125	0.0714286	0.322581
	base
	mid
	Apex

## Sheet: Tbc1d32_bromi
		Figure 5-figure supplement 1-A							Figure 5-figure supplement 1-B							Figure 5-figure supplement 1-C
	Tbc1d32_Bromi
		Base							Mid							Apex
		IHC	OHC1	OHC2	Last OHC				IHC	OHC1	OHC2	Last OHC				IHC	OHC1	OHC2	Last OHC
	1	-5.423	-10.666	6.232	21.096	B84E mut		1	-5.883	4.514	13.088	24.422			1	10.322	-4.977	5.082	25.01
	2	-13.973	5.363	9.799	24.099			2	10.713	-5.626	14.66	49.226			2	15.014	7.386	29.093	-13.234
	3	-8.015	-4.64	13.402	20.914			3	14.783	-5.671	17.304	11.769			3	26.347	1.811	10.53	37.424
	4	3.228	-23.759	2.95	15.725			4	-3.93	10.692	16.884	37.786			4	24.174	2.217	25.751	11.774
	5	-52.439	9.91	4.801	22.119			5	5.953	-6.29	3.531	56.916			5	17.407	8.486	-5.248	-29.686
	6	-4.377	13.175	12.01	13.087			6	-7.052	6.802	-8.835	19.356			6	-4.451	-1.128	-4.722	-8.53
	7	41.237	41.257	9.246	14.63			7	9.706	11.775	5.44	8.479			7	2.171	-20.835	-4.04	10.383
	8	24.896	36.337	24.796	20.54			8	4.121	8.433	12.249	9.1			8	10.634	-27.69	-8.265	2.874
	9	37.315	10.242	3.12	48.814			9	-1.5	7.229	10.96	18.29			9	27.621	12.259	-2.187	-29.114
	10		7.467	-1.921	59.708			10	3.779	-3.131	23.41	13.204			10		-8.384	-4.699	-10.487
	11				51.457			11		5.857	6.212	10.281			11			-2.663	52.074
	12				38.247			12				16.197			12				36.798
	13				24.816			13				23.24			13				50.988
	14				32.382			14				35.446			14				53.164
	15				36.133			15	-2.252	36.438	-31.535	-4.189			15				43.903
	16				37.001			16	-8.259	-25.951	-14.564	18.311			16				39.094
	17				6.124			17	-25.614	-32.31	1.695	8.949			17				24.322
	18	26.73	42.12	56.952	3.814	B172A LE mut		18	-22.359	-24.88	5.29	6.096			18				22.702
	19	35.651	27.393	58.288	5.711			19	-20.227	-43.833	3.635	7.058			19				13.258
	20	23.58	52.835	52.803	-21.545			20	-23.685	-14.539	-3.474	27.108			20				45.987
	21	16.545	51.267	56.628	-0.725			21	-29.304	-6.112	-1.441	5.242			21				2.459
	22	-5.81	22.38	55.778	-18.975			22	-24.444	3.656	-15.127	17.847			22				29.192
	23	24.644	10.559	49.496	-17.004			23	-32.399	-28.185	-30.536	50.777			23				23.074
	24	9.607	10.62	53.195	-18.118			24		-23.923	-10.812	10.305			24				50.658
	25	12.642	13.383	61.846	-1.273			25		-33.009	12.978	34.146			25				38.442
	26	16.621	13.383	47.952				26		-9.135	-30.878	2.904			26				23.486
	27		36.919					27		-6.932		-6.856			27	19.328	-27.37	10.316	20.752
	28	-2.551	8.224	-3.589	9.733	B172A RE mut		28		-30.116		24.444			28	-3.321	-32.905	-2.361	8.486
	29	-1.172	-10.883	-7.584	2.203			29		2.544		25.442			29	-22.214	46.312	-2.361	19.203
	30	1.753	-13.56	1.931	22.601			30	-13.069	7.334	16.645	9.462			30	11.901	51.881	32.081	2.386
	31	-12.567	8.476	8.234	5.194			31	-3.18	7.253	15.871	34.412			31	15.225	69.444	10.844	17.85
	32	0.255	2.011	12.084	19.983			32	-6.006	5.572	-1.071	32.276			32	10.291	46.258	38.669	1.091
	33	-3.937	2.746	1.848	19.983			33	7.125	7.38	-0.299	51.776			33	49.167	43.8	32.735	13.132
	34	-8.084	12.4	0.63	18.86			34	7.214	4.17	5.545	51.009			34	31.399			-1.432
	35	-4.48	11.924	0.64	0.546			35	4.485	8.115	4.715	45.13			35	20.261			48.536
	36	-2.045	8.13	-1.577	29.691			36	4.399	12.023	2.291	46.112			36				27.427
	37	-5.99	11.817	11.972	22.678			37	19.026	1.771	-16.717	56.933			37	-5.865			11.31
	38	3.953	1.548	-2.759	21.198			38	11.836	8.122	1.181	41.323			38	5.023			0.963
	39	-3.708	-20.472	-2.141	41.168			39	18.866	7.62	8.723	48.215			39				18.99
	40	-4.122	2.291	6.596	45.151			40	-8.359	0.623	8.13	47.981			40				23.344
	41	10.395		-4.62	43.62			41	6.002	0.591	11.252	56.351			41				20.294
	42	3.013						42	9.467	5.711	0	41.079			42				32.32
	43	3.094						43							43				21.033
	44	-12.335						44							44				6.537
	45	1.219						45							45				13.445
	46	3.007						46							46				5.711
	47	0.65						47							47				8.313
	48	3.693						48							48	1.012	0.403	10.125	8.366
	49	-29.011						49							49	16.39	6.981	28.511	2.426
	50	-13.385						50							50	-44.929	9.904	21.615	16.074
	51							51							51	-21.571	-21.435	-0.854	39.19
	52							52							52	-5.301	-1.989	7.595	58.154
	53							53							53	-24.681	-3.347	12.555	10.091
	54							54							54	7.368	3.814	0.623	21.801
	55							55							55	-14.801	4.304	1.909	34.406
	56							56							56	10.816	-6.889	0.651	26.565
	57							57							57	-8.499	3.077	-1.685	56.31
	58							58							58	0.65	-8.562	-1.146	56.31
	59							59							59	-13.031	46.102	0.654	45
	60							60							60		0.603	0.68	24.897
	61							61							61			8.13
	Total count	41	33	33	39			Total count	32	39	36	42			Total count	32	30	32	60
	Count
	Range	IHC	OHC1	OHC2	OHC3			Range	IHC	OHC1	OHC2	OHC3			Range	IHC	OHC1	OHC2	OHC3
	"-180< ~ <= -150"	0	0	0	0			"-180< ~ <= -150"	0	0	0	0			"-180< ~ <= -150"	0	0	0	0
	"-150< ~ <=-120"	0	0	0	0			"-150< ~ <=-120"	0	0	0	0			"-150< ~ <=-120"	0	0	0	0
	"-120<= ~ <-90"	0	0	0	0			"-120<= ~ <-90"	0	0	0	0			"-120<= ~ <-90"	0	0	0	0
	"-90<= ~ <-60"	0	0	0	0			"-90<= ~ <-60"	0	0	0	0			"-90<= ~ <-60"	0	0	0	0
	"-60<= ~ <-30"	1	0	0	0			"-60<= ~ <-30"	1	4	3	0			"-60<= ~ <-30"	1	1	0	0
	"-30<= ~ <0"	18	6	7	6			"-30<= ~ <0"	16	12	10	2			"-30<= ~ <0"	10	11	12	6
	"0<= ~ <30"	19	21	17	23			"0<= ~ <30"	15	22	24	22			"0<= ~ <30"	19	12	17	36
	"30< ~ <=60"	3	6	8	10			"30< ~ <=60"	0	1	0	18			"30< ~ <=60"	2	5	3	18
	"60< ~ <=90"	0	0	1	0			"60< ~ <=90"	0	0	0	0			"60< ~ <=90"	0	1	0	0
	"90< ~ <=120"	0	0	0	0			"90< ~ <=120"	0	0	0	0			"90< ~ <=120"	0	0	0	0
	"120< ~ <=150"	0	0	0	0			"120< ~ <=150"	0	0	0	0			"120< ~ <=150"	0	0	0	0
	"150< ~ <=180"	0	0	0	0			"150< ~ <=180"	0	0	0	0			"150< ~ <=180"	0	0	0	0
	total	41	33	33	39			total	32	39	37	42			total	32	30	32	60
	Count
	Range	IHC	OHC1	OHC2	OHC3			Range	IHC	OHC1	OHC2	OHC3			Range	IHC	OHC1	OHC2	OHC3
	"-180< ~ <= -150"	0	0	0	0			"-180< ~ <= -150"	0	0	0	0			"-180< ~ <= -150"	0	0	0	0
	"-150< ~ <=-120"	0	0	0	0			"-150< ~ <=-120"	0	0	0	0			"-150< ~ <=-120"	0	0	0	0
	"-120<= ~ <-90"	0	0	0	0			"-120<= ~ <-90"	0	0	0	0			"-120<= ~ <-90"	0	0	0	0
	"-90<= ~ <-60"	0	0	0	0			"-90<= ~ <-60"	0	0	0	0			"-90<= ~ <-60"	0	0	0	0
	"-60<= ~ <-30"	0.0243902	0	0	0			"-60<= ~ <-30"	0.03125	0.102564	0.0810811	0			"-60<= ~ <-30"	0.03125	0.0333333	0	0
	"-30<= ~ <0"	0.439024	0.181818	0.212121	0.153846			"-30<= ~ <0"	0.5	0.307692	0.27027	0.047619			"-30<= ~ <0"	0.3125	0.366667	0.375	0.1
	"0<= ~ <30"	0.463415	0.636364	0.515152	0.589744			"0<= ~ <30"	0.46875	0.564103	0.648649	0.52381			"0<= ~ <30"	0.59375	0.4	0.53125	0.6
	"30< ~ <=60"	0.0731707	0.181818	0.242424	0.25641			"30< ~ <=60"	0	0.025641	0	0.428571			"30< ~ <=60"	0.0625	0.166667	0.09375	0.3
	"60< ~ <=90"	0	0	0.030303	0			"60< ~ <=90"	0	0	0	0			"60< ~ <=90"	0	0.0333333	0	0
	"90< ~ <=120"	0	0	0	0			"90< ~ <=120"	0	0	0	0			"90< ~ <=120"	0	0	0	0
	"120< ~ <=150"	0	0	0	0			"120< ~ <=150"	0	0	0	0			"120< ~ <=150"	0	0	0	0
	"150< ~ <=180"	0	0	0	0			"150< ~ <=180"	0	0	0	0			"150< ~ <=180"	0	0	0	0
	total	1	1	1	1			total	1	1	1	1			total	1	1	1	1
	base
	mid
	Apex
	45
	46
	47
	48
	49
	50
	51
	52
	53
	54
	55
	56
	57
	58
	59
	60
	61
	62
	63
	64
	65
	19
	20
	21
	22
	23
	24
	25
	26
	27
	28
	29
	30
	31
	32
	118
	119
	120
	121
	122
	123
	124
	125
	126
	127
	128
	129
	130
	131
	132
	133
	134
	135
	136
	137
	138
	139
	140
	0
	0
	0
	0
	0
	0
	0
	0
	0
	0
	0
	0
	0
	0
	0
	0
	0
	0
	0
	0
	0
	66
	67
	68
	69
	70
	71
	72
	73
	74
	75
	76
	77
	78
	79
	80
	81
	82
	83
	84
	85
	86
	87
	88
	1
	2
	3
	4
	5
	6
	7
	8
	9
	10
	11
	12
	13
	14
	15
	16
	17
	18
	19
	20
	21
	22
	23
	45
	46
	47
	48
	49
	50
	51
	52
	53
	54
	55
	56
	57
	58
	59
	60
	61
	62
	63
	64
	65
	1
	2
	3
	4
	5
	6
	7
	8
	9
	10
	11
	12
	13
	14
	15
	16
	17
	18
	19
	20
	21
	22
	23
	24
	25
	26
	16
	17
	18
	19
	20
	21
	22
	23
	24
	25
	26
	27
	28
	29
	30
	31
	32
	33
	34
	35
	36
	1
	2
	3
	4
	5
	6
	7
	8
	9
	10
	11
	12
	13
	14
	15
	16
	17
	18
	1
	2
	3
	4
	5
	6
	7
	8
	9
	10
	11
	12
	13
	14
	15
	16
	17
	18
	19
	20
	21
	22
	23
	24
	1
	2
	3
	4
	5
	6
	7
	8
	9
	10
	11
	12
	13
	14
	15
	16
	17
	1
	2
	3
	4
	5
	6
	7
	8
	9
	10
	11
	12
	13
	14
	15
	16
	17
	18
	18
	19
	20
	21
	22
	23
	24
	25
	26
	27
	28
	29
	30
	31
	32
	33
	34
	35
	36

## Sheet: Cilk1 KO
		Figure 5-figure supplement 1-A							Figure 5-figure supplement 1-B							Figure 5-figure supplement 1-C
	Cilk1 KO
		Base							Mid							Apex
		IHC	OHC1	OHC2	Last OHC				IHC	OHC1	OHC2	Last OHC				IHC	OHC1	OHC2	Last OHC
	1	-28.421	-2.496	0.218	33.699	Ick57B mut		1	5.822	25.474	40.853	15.533	Ick57B mut		1	6.005	-48.283	21.005	13.079	Ick57B mut
	2	-1.231	-1.764	0.558	15.918			2	30.323	25.811	33.851	40.323			2	10	3.324	-8.421	33.688
	3	3.016	-1.441	2.449	34.579			3	-0.909	22.974	50.912	19.432			3	11.547	-16.924	4.754	35.528
	4	0.873	2.291	0.293	21.08			4	29.895	35.87	9.278	47.797			4	-2.597	8.803	52.867	-6.221
	5	3.584	-16.757	24.651	30.77			5	-31.343	19.864	45.164	20.569			5	15.755	11.103	-12.281	11.814
	6	4.031	5.434	-13.884	23.958			6	27.113	35.978	-4.342	31.023			6	11.394	-14.657	21.509	11.294
	7	-10.894	7.509	-1.12	19.368			7	14.199	15.585	15.394	44.087			7	34.789	5.81	5.581	36.231
	8	7.511	-3.306	9.75	34.75			8	16.557	-7.95	30.728	27.886			8		-9.462	-2.708	6.082
	9		-7.002	-0.274	21.767			9	-1.032	32.703	-3.222	25.29			9		-20.951	4.488	0.731
	10		-4.272	1.566	28.924			10	15.096	11.15	5.418	46.82			10		4.044	16.028	10.449
	11		-10.129	-8.599	37.423			11	-13.726	0.165	29.779	37.857			11		32.773	19.647	15.128
	12		1.396	3.413				12	-12.14	18.066	7.2	29.975			12		18.899	5.161	0.872
	13	-3.632	-3.35	-20.864	9.939	Ick164B mut		13		-39.05	-32.268				13				50.42
	14	1.903	-7.406	-7.858	9.627			14		-17.337	-11.318				14	-24.911	12.01	8.225	1.43	Ick164B mut
	15	-15.889	-7.5	-4.566	9.408			15	-21.457	8.676	0.185	0.03	Ick164B mut		15	27.444	11.253	8.308	1.857
	16	-14.044	2.207	6.144	-0.152			16	-28.421	0.71	11.367	-0.116			16	-5.338	21.412	4.894	12.767
	17	2.117	-9.227	-3.736	-4.117			17	-1.465	0.016	-9.936	-17.814			17	-44.405	10.952	1.916	13.172
	18	-16.091	-16.298	-14.269	-0.8			18	13.966	18.084	-2.953	-1.032			18	-6.248	24.871	7.286	12.62
	19	-1.288	-2.033	14.576	-8.276			19	6.866	13.943	7.535	10.989			19	22.359	8.928	7.636	14.186
	20	1.904	-0.226	-4.419	1.904			20	4.743	-4.014	4.911	29.441			20	6.976	4.934	-5.919	11.905
	21	-1.831	16.761	-5.526	8.169			21	6.807	-7.744	6.676	-8.603			21	-12.12	4.399	6.239	2.399
	22		7.398	14.1	3.294			22	2.029	9.3	8.637	-7.94			22	-7.271	39.487	-5.922	7.46
	23		1.875	-2.37				23	3.053	-5.536	4.352	12.599			23	-76.987	-10.562	29.492	-2.071
	24	-9.906	-2.027	-4.936	-16.107	Ick164A		24	9.834	15.152	5.785	17.427			24			-46.736	-10.374
	25	9.396	-2.593	-7.305	-2.305			25	13.538	4.546	7.08	-4.605			25			-4.809
	26	-15.35	-14.599	1.254	-0.13			26		2.806	-0.141				26	-0.8	1.496	4.044	5.592	Ick164A
	27	-11.856	-1.115	-1.332	-23.164			27		2.207					27	39.677	10.036	9.33	-3.115
	28	-20.393	0.395	-3.865	-18.25			28	-0.442	-2.187	0.765	4.677	Ick164A		28	-4.236	7.532	0.109	-36.947
	29	-12.547	0.465	-13.703	0.427			29	22.556	-1.061	9.261	26.003			29	-4.236	-4.447	1.919	-0.199
	30	-11.023	-5.706	0.622	-35.414			30	1.691	-3.188	2.116	18.435			30	-7.639	13.68	3.518	-29.482
	31	1.721	-0.632	2.586	-29.959			31	-1.625	0.134	8.702	21.326			31	-1.139	0.969	-8.16	-3.439
	32	18.483	4.323	-7.32	-18.877			32	2.921	-2.154	18.945	20.605			32	9.609	9.23	-19.623	22.353
	33		-12.817	-5.539	5.674			33	15.975	-0.805	8.31	8.144			33	1.357	-0.877	13.258	9.659
	34		8.135	-14.376	18.88			34	17.278	1.865	9.073	8.969			34	18.642	6.274	2.851	36.853
	35		2.892	-2.172	19.826			35	0.196	-9.061	1.151	15.625			35	-7.46	12.694	6.08
	36							36	3.735	-6.76	1.576	18.458			36	20.778	-1.773	-7.097
	37							37	7.742	0.011	11.083	24.007			37	-13.525	5.786	-13.927
	38							38	12.719	-4.41	12.186	22.92			38	16.074	-6.856	-14.021
	39							39	-2.562	-7.544	-16.386	23.768			39	10.53	15.912	13.246
	40							40	-10.949	-5.003	-4.209	-6.494			40	11.406	-4.04
	41							41	-18.317	-29.249	-12.617				41		1.325
	42							42		0.761					42		4.942
	43							43		-9.92					43
	44							44							44
	45							45							45
	46							46							46
	47							47							47
	48							48							48
	49							49							49
	50							50							50
	51							51							51
	52							52							52
	53							53							53
	54							54							54
	55							55							55
	56							56							56
	57							57							57
	58							58							58
	59							59							59
	60							60							60
	61							61							61
	Total count	26	35	35	33			Total count	37	43	40	36			Total count	32	39	38	33
	Count
	Range	IHC	OHC1	OHC2	OHC3			Range	IHC	OHC1	OHC2	OHC3			Range	IHC	OHC1	OHC2	OHC3
	"-180< ~ <= -150"	0	0	0	0			"-180< ~ <= -150"	0	0	0	0			"-180< ~ <= -150"	0	0	0	0
	"-150< ~ <=-120"	0	0	0	0			"-150< ~ <=-120"	0	0	0	0			"-150< ~ <=-120"	0	0	0	0
	"-120<= ~ <-90"	0	0	0	0			"-120<= ~ <-90"	0	0	0	0			"-120<= ~ <-90"	0	0	0	0
	"-90<= ~ <-60"	0	0	0	0			"-90<= ~ <-60"	0	0	0	0			"-90<= ~ <-60"	1	0	0	0
	"-60<= ~ <-30"	0	0	0	1			"-60<= ~ <-30"	1	1	1	0			"-60<= ~ <-30"	1	1	1	1
	"-30<= ~ <0"	15	22	21	11			"-30<= ~ <0"	12	17	9	7			"-30<= ~ <0"	13	10	11	7
	"0<= ~ <30"	11	13	14	16			"0<= ~ <30"	23	22	25	23			"0<= ~ <30"	15	26	25	20
	"30< ~ <=60"	0	0	0	5			"30< ~ <=60"	1	3	5	6			"30< ~ <=60"	2	2	1	5
	"60< ~ <=90"	0	0	0	0			"60< ~ <=90"	0	0	0	0			"60< ~ <=90"	0	0	0	0
	"90< ~ <=120"	0	0	0	0			"90< ~ <=120"	0	0	0	0			"90< ~ <=120"	0	0	0	0
	"120< ~ <=150"	0	0	0	0			"120< ~ <=150"	0	0	0	0			"120< ~ <=150"	0	0	0	0
	"150< ~ <=180"	0	0	0	0			"150< ~ <=180"	0	0	0	0			"150< ~ <=180"	0	0	0	0		above 30'
																					base	mid	apex
	total	26	35	35	33			total	37	43	40	36			total	32	39	38	33		129	156	142
																					6	18	15
																					0.0465116	0.115385	0.105634
	Count							Count							Count
	Range	IHC	OHC1	OHC2	OHC3			Range	IHC	OHC1	OHC2	OHC3			Range	IHC	OHC1	OHC2	OHC3
	"-180< ~ <= -150"	0	0	0	0			"-180< ~ <= -150"	0	0	0	0			"-180< ~ <= -150"	0	0	0	0
	"-150< ~ <=-120"	0	0	0	0			"-150< ~ <=-120"	0	0	0	0			"-150< ~ <=-120"	0	0	0	0
	"-120<= ~ <-90"	0	0	0	0			"-120<= ~ <-90"	0	0	0	0			"-120<= ~ <-90"	0	0	0	0
	"-90<= ~ <-60"	0	0	0	0			"-90<= ~ <-60"	0	0	0	0			"-90<= ~ <-60"	0.03125	0	0	0
	"-60<= ~ <-30"	0	0	0	0.030303			"-60<= ~ <-30"	0.027027	0.0232558	0.025	0			"-60<= ~ <-30"	0.03125	0.025641	0.0263158	0.030303
	"-30<= ~ <0"	0.576923	0.628571	0.6	0.333333			"-30<= ~ <0"	0.324324	0.395349	0.225	0.194444			"-30<= ~ <0"	0.40625	0.25641	0.289474	0.212121
	"0<= ~ <30"	0.423077	0.371429	0.4	0.484848			"0<= ~ <30"	0.621622	0.511628	0.625	0.638889			"0<= ~ <30"	0.46875	0.666667	0.657895	0.606061
	"30< ~ <=60"	0	0	0	0.151515			"30< ~ <=60"	0.027027	0.0697674	0.125	0.166667			"30< ~ <=60"	0.0625	0.0512821	0.0263158	0.151515
	"60< ~ <=90"	0	0	0	0			"60< ~ <=90"	0	0	0	0			"60< ~ <=90"	0	0	0	0
	"90< ~ <=120"	0	0	0	0			"90< ~ <=120"	0	0	0	0			"90< ~ <=120"	0	0	0	0
	"120< ~ <=150"	0	0	0	0			"120< ~ <=150"	0	0	0	0			"120< ~ <=150"	0	0	0	0
	"150< ~ <=180"	0	0	0	0			"150< ~ <=180"	0	0	0	0			"150< ~ <=180"	0	0	0	0
	total	1	1	1	1			total	1	1	1	1			total	1	1	1	1
		0	0	0	0.181818	0.181818			0.0540541	0.0930233	0.15	0.166667	0.463744			0.125	0.0769231	0.0526316	0.181818	0.436373
	base
	mid
	apex
