# Supplementary material for: Dysregulation of sonic hedgehog signaling causes hearing loss in ciliopathy mouse models
Source: eLife. 2020 Dec 31;9:e56551. doi: 10.7554/eLife.56551 (PMC7806262; doi:10.7554/eLife.56551)
Supplement: Figure 5—figure supplement 1—source data 2. [file elife-56551-fig5-figsupp1-data2.xlsx]

## Sheet: All
	Figure 5-figure supplement 1 D
	Line 363	* total HC >30' , WT vs Ift88 cKO				Line 363	* total OHC >30' , WT vs Ift88 cKO					Line 390	*basal OHC >30'				*mid OHC >30'				*apical OHC >30'
			WT	Ift88 cKO				WT	Ift88 cKO				WT	bromi	Cilk1 KO		WT	bromi	Cilk1 KO		WT	bromi	Cilk1 KO
		Sample1	0.0896552	0.626374			Sample1	0.105023	0.739927			Sample1	0.0266667	0.243243	0.0555556	Sample1	0.164384	0.25641	0.162791	Sample1	0.126761	0.212766	0.108108
		Sample2	0.162162	0.645995			Sample2	0.179104	0.77			Sample2	0.0649351	0.190476	0.0689655	Sample2	0.27027	0.238095	0.0952381	Sample2	0.22	0.314286	0.111111
		Sample3	0.0893471	0.610687			Sample3	0.0986547	0.665245			Sample3	0	0.307692	0.0526316	Sample3	0.139241	0.166667	0.147059	Sample3	0.207547	0.175	0.0810811
		Aveage	0.113721	0.627685			Aveage	0.127594	0.725057			Aveage	0.0305339	0.247137	0.0590509	Aveage	0.191298	0.220391	0.135029	Aveage	0.184769	0.234017	0.1001
		STDEV	0.0419512	0.0176904			STDEV	0.0447229	0.0539372			STDEV	0.0326398	0.058705	0.0087099	STDEV	0.0695377	0.047419	0.0353465	STDEV	0.0506214	0.0720336	0.0165393
		p-value by t-test	0.000466259				p-value by t-test vs WT	0.000558893				p-value by t-test		0.0270933	0.0895823	p-value by t-test		0.251219	0.221881	p-value by t-test		0.176169	0.0633397
	Line 363	* total HC >30' , WT vs bromi	WT	bromi		Line 363	* total OHC >30' , WT vs bromi	WT	bromi
		Sample1	0.0896552	0.26087			Sample1	0.105023	0.235772
		Sample2	0.162162	0.160714			Sample2	0.179104	0.243697
		Sample3	0.0893471	0.181818			Sample3	0.0986547	0.205882			Line 390	*basal OHC >30'					*mid OHC >30'					*apical OHC >30'
		Aveage	0.113721	0.201134			Aveage	0.127594	0.228451				Ift88 cKO	bromi	Cilk1 KO			Ift88 cKO	bromi	Cilk1 KO			Ift88 cKO	bromi	Cilk1 KO
		STDEV	0.0419512	0.0527977			STDEV	0.0447229	0.0199424			Sample1	0.724138	0.243243	0.0555556		Sample1	0.733333	0.25641	0.162791		Sample1	0.776119	0.212766	0.108108
		p-value by t-test vs WT	0.11098				p-value by t-test vs WT	0.0174666				Sample2	0.692308	0.190476	0.0689655		Sample2	0.85	0.238095	0.0952381		Sample2	0.735294	0.314286	0.111111
		p-value by t-test vs Ift88 cKO	0.003257				p-value by t-test vs Ift88 cKO	0.000784088				Sample3	0.693069	0.307692	0.0526316		Sample3	0.696429	0.166667	0.147059		Sample3	0.625	0.175	0.0810811
												Aveage	0.703172	0.247137	0.0590509		Aveage	0.759921	0.220391	0.135029		Aveage	0.712138	0.234017	0.1001
	Line 363	* total HC >30' , WT vs Ick KO	WT	Cilk1 KO		Line 363	* total OHC >30' , WT vs Cilk1 KO	WT	Cilk1 KO			STDEV	0.0181613	0.058705	0.0087099		STDEV	0.0801636	0.047419	0.0353465		STDEV	0.0781756	0.0720336	0.0165393
		Sample1	0.0896552	0.10274			Sample1	0.105023	0.112069				Ift88 vs bromi	Ift88 vs Cilk1 KO				Ift88 vs bromi	Ift88 vs Cilk1 KO				Ift88 vs bromi	Ift88 vs Cilk1 KO
		Sample2	0.162162	0.0935252			Sample2	0.179104	0.0934579			p-value by t-test	0.00306025	0.000209498			p-value by t-test	0.0026281	0.00535952			p-value by t-test	0.00407519	0.00175283
		Sample3	0.0893471	0.0774648			Sample3	0.0986547	0.0917431
		Aveage	0.113721	0.0912432			Aveage	0.127594	0.09909				WT vs Ift88 cKO					WT vs Ift88 cKO					WT vs Ift88 cKO
		STDEV	0.0419512	0.0127911			STDEV	0.0447229	0.0112728			p-value by t-test	0.000566895					6.55091e-05					0.00793
		p-value by t-test vs WT	0.225342				p-value by t-test vs WT	0.213673
		p-value by t-test vs Ift88 cKO	0.00012485				p-value by t-test vs Ift88 cKO	0.00112633
							Test type	p-value	Significance?		Average	Total HC	Total OHC	Basal OHC	Mid OHC	Apical OHC
						Line 363	WT total OHC vs Ift88 total OHC	0.000558893	Yes		WT	0.113721	0.127594	0.0305339	0.191298	0.184769
						Line 363	WT total OHC vs bromi total OHC	0.0174666	No		Ift88 cKO	0.627685	0.725057	0.703172	0.759921	0.712138
						Line 363	WT total OHC vs Cilk1 KO total OHC	0.213673	No		bromi	0.201134	0.228451	0.247137	0.220391	0.234017
						Line 390	WT basal OHC vs bromi basal OHC	0.0270933	Yes		Cilk1 KO	0.0912432	0.09909	0.0590509	0.135029	0.1001
						Line 390	WT mid OHC vs bromi mid OHC	0.251219	No
						Line 390	WT apex OHC vs bromi apex OHC	0.176169	No
						Line 390	Ift88 basal OHC vs bromi basal OHC	0.00306025	Yes
						Line 390	Ift88 mid OHC vs bromi mid OHC	0.0026281	Yes
						Line 390	Ift88 apical OHC vs bromi apical OHC	0.00407519	Yes			Basal OHC	Mid OHC	Apical OHC
						Line 390	Ift88 basal OHC vs Cilk1 KO basal OHC	0.000209498	Yes		Ift88 cKO	0.703172	0.759921	0.712138
						Line 390	Ift88 mid OHC vs Cilk1 KO mid OHC	0.00535952	Yes		bromi	0.247137	0.220391	0.234017
						Line 390	Ift88 apical OHC vs Cilk1 KO apical OHC	0.00175283	Yes		Cilk1 KO	0.0590509	0.135029	0.1001
											STDEV	Total HC	Total OHC	Basal OHC	Mid OHC	Apical OHC
											WT	0.0419512	0.0447229	0.0326398	0.0695377	0.0506214
											Ift88 cKO	0.0176904	0.0539372	0.0181613	0.0801636	0.0781756
											bromi	0.0527977	0.0199424	0.058705	0.047419	0.0720336
											Cilk1 KO	0.0127911	0.0112728	0.0087099	0.0353465	0.0165393
											STDEV	Basal OHC	Mid OHC	Apical OHC
											Ift88 cKO	0.0181613	0.0801636	0.0781756
											bromi	0.058705	0.047419	0.0720336
											Cilk1 KO	0.0087099	0.0353465	0.0165393

## Sheet: WT PC
	sample1						sample2						sample3
	Deviation	IHC	OHC1	OHC2	OHC3		Deviation	IHC	OHC1	OHC2	OHC3		Deviation	IHC	OHC1	OHC2	OHC3
base	1	-1.081	18.307	-7.958	-2.99	base	26	5.642	-5.639	-1.776	-0.168	base	52	11.31	-1.081	-1.697	-27.02
	2	7.458	7.101	-0.261	24.603		27	-0.184	4.316	-0.126	15.255		53	19.983	-1.931	-9.936	-20.556
	3	-5.113	6.436	16.027	1.871		28	-10.305	-11.31	-0.549	38.66		54	21.801	-7.726	-13.023	-12.205
	4	-3.137	4.087	16.884	-13.908		29	0.387	-4.764	9.993	0.498		55	12.444	-8.796	-18.901	-23.535
	5	-5.918	-11.207	-7.875	-3.058		30	-4.794	-13.407	-12.995	-0.495		56		-14.518	-20.556	-16.346
	6	-1.898	-1.197	-2.411	3.314		31		-12.529	-8.13	1.494		57		-9.462	-7.125
	7	-0.564	2.694	0.843	-6.023		32		0.678		-8.379		58	-9.978	1.229	-7.125	0.367
	8	-10.441	20.846	-1.103	-6.278		33	26.565	-0.268	-10.305	-7.125		59	-16.028	-2.843	-5.711	-7.261
	9	19.566	22.031	12.534	60.723		34	-4.764	-0.158	-11.31	-8.13		60	-10.513	-5.62	-0.091	-12.923
	10	-10.305	5.124	-4.086	-41.607		35	17.838	-6.937	19.125	-9.592		61	-2.056	1.032	-18.646	-1.652
	11	-0.497	19.783	7.397	-11.854		36	3.576	-5.194	-26.565	-14.983		62	-7.524	2.068	-18.651	-5.084
	12	8.543	3.614	12.529	4.399		37	12.002	10.684	-15.775	-0.165		63	-15.11	0.641	-28.117	3.917
	13	-1.102	5.711	11.335	5.121		38	18.852	0.955	-5.829	21.59		64	-6.936	2.249	-10.339	-18.798
	14	-8.488	12.529	11.279	16.928		39	-0.1998	-10.88	-6.903	6.948		65	-0.494	-12.203	12.691	-8.365
	15	9.896	-0.255	-0.126	6.221		40	1.312	-10.435	-2.511	17.278		66	13.066	-17.557	-7.382	-3.412
	16	0.674	-0.2645	0.666	13.427		41	23.384	-3.362	-32.304	-0.465		67	0.494	17.32	-7.822	4.683
	17	-6.34	15.329	18.435	23.199		42	-5.176	-13.891	-4.764	-5.237		68		9.486	-12.962	-8.13
	18	0.744	-0.597	18.435	10.725		43		-11.764	-24.996	1.863		69		6.001		-0.49
	19	0.725	-1.771	-0.48	-1.181		44	2.531	-0.298	6.911	0.543		70				-1.169
	20	-11.906	-0.458	4.764	5.194		45	1.048	17.135	14.273	-39.067		71	5.932	-1.081	-3.814	-7.452
	21	0.63	0.63	5.838	-5.711		46	10.749	-2.663	0.559	-23.129		72	-2.291	12.955	-0.955	12.933
	22	-20.821	-0.268	-21.62	20.556		47	2.552	-2.468	-3.145	-34.689		73	-5.805	-4.399	2.896	1.128
	23	-17.354	14.036	-1.897	-12.041		48	11.813	-1.975	-3.338	-24.9		74	-0.168	16.546	-1.863	8.07
	24	-1.548	-0.754	-12.56	23.378		49	4.399	-1.364	-10.439	-14.239		75	3.909	-0.268	-2.106	16.274
	25	-0.266	-6.69	-8.437	-6.18		50	15.238	-1.469	-2.553	-34.785		76	-9.927	0.521	-6.017	3.814
							51	27.614	-7.125	-9.636	-7.125		77	-2.84	11.522	-11.054	1.562
													78	-11.492	1.123	3.744	4.764
													79	-3.442	4.438	1.591	8.746
													80	-13.306	5.576	-7.212	16.959
													81	10.883	-12.301	0.074	6.444
													82	-2.916	-8.873	-0.935	-2.389
													83		-0.688		-2.069
mid	84	1.27	-1.674	-0.49	-71.526	mid	110	-13.285	10.061	-3.4	-36.02	mid	135	-3.814	-2.291	-1.469	12.095
	85	19.478	-12.642	1.835	-19.577		111	15.596	22.346	10.376	-38.679		136	-0.971	-1.488	-12.041	4.086
	86	-27.732	10.92	5.376	-43.456		112	15.108	14.701	2.166	-13.641		137	-4.243	-12.351	-5.393	11.504
	87	-7.044	11.063	-19.487	-19.589		113	-0.939	11.914	23.986	-36.353		138	-9.819	-3.545	-5.688	0.466
	88	-0.3	-23.307	-10.246	-40.18		114	-0.716	15.945	-6.307	-47.083		139	-12.095	-9.462	-13.529	-6.516
	89	-0.662	0.488	-6.176	-39.734		115	4.191	4.394	18.619	-34.638		140	0.61	0.477	-11.31	9.709
	90	4.563	-23.113	17.219	-17.736		116	-5.029	22.099	24.944	-37.931		141	-2.427	-9.462	8.746	-2.337
	91	-14.017	0.129	12.579	20.956		117	14.164	5.194	-17.026	-56.31		142	-0.165	4.764	0.963	23.236
	92	-6.47	-2.895	-0.422	-50.887		118		5.711	-5.784	-38.704		143	-14.931	-13.089	-3.378	11.371
	93	2.556	-17.376	-2.386	-29.019		119		12.529		-34.117		144	-3.167	7.226	5.819	10.574
	94	-28.508		-6.394	-46.339		120	-18.547	-17.613	-2.726	-35.272		145	-2.394	-2.176	5.819	10.631
	95	-11.836					121	-28.383	-26.565	11.06	-49.611		146	-0.579	-6.691	-5.81	8.734
	96	-17.318	0.962	-20.187	-22.058		122	-25.252	25.791	-22.346	-36.87		147	-20.481	-16.572	-0.225	-3.487
	97	-2.993	-2.788	1.968	24.85		123	-18.142	17.374	-17.103	-26.93		148	11.01	9.926	20.695	33.591
	98	-32.658	22.086	1.221	-21.44		124	-13.575	15.133	7.919	-47.337		149	7.675	2.325	3.18	28.74
	99	-25.895	-11.937	2.77	-8.304		125	-22.712	-2.203	-11.143	-28.785		150	29.651	2.22	23.164	50.79
	100	-7.196	-21.302	17.858	-48.645		126	-19.975	-16.843	-19.637	-26.305		151	-4.097	5.511	13.594	48.18
	101	-1.677	-17.375	17.266	-32.443		127	-25.222	-2.454	-14.813	-31.379		152	8.367	13.368	7.44	23.514
	102	-32.232	14.634	3.798	-13.355		128	-26.038	19.422	-2.806	-8.043		153	8.264	5.65	10.83	37.926
	103	8.09	-9.997	19.964	-20.217		129	-10.748	10.892	16.049	-40.173		154	0.915	8.754	3.129	30.53
	104	-3.796	-4.253	-35.914	-4.951		130		-7.222	47.339	-36.902		155	-0.151	-5.092	-1.051	43.192
	105	-12.601	-30.256	-18.721	-10.844		131		-8.983	-6.216	-41.507		156	1.248	-2.862	14.644	39.758
	106		7.371		-11.411		132		-8.715	-2.224	-36.181		157	7.198	4.749	9.776	58.165
	107	11.452	-1.848	2.779	-16.211		133		-13.431	-6.599	-53.949		158	7.14	-1.364	4.529	-7.359
	108	-5.332	19.128	6.643	-32.372		134	-0.165	-2.603	-3.18	18.652		159	8.746	13.59	16.699	32.077
	109	2.666	16.636	1.008	-40.301								160	-5.975	1.071	17.963	55.1
													161				30.283
Apex	162	-1.637	-23.199	-7.417	-18.622	Apex	187	24.231	11.17	-5.169	-37.558	Apex	205	-30.811	28.803	-38.884	-32.005
	163	6.34	-8.13	17.114	-27.35		188	14.655	26.134	-10.235	-25.292		206	-33.721	-40.27	-17.047	-30.75
	164	-28.796	1.863	-30.47	-13.42		189	-3.642	-21.501	-14.143	-39.936		207	-51.429	-41.565	3.045	-34.145
	165	-7.442	-15.353	15.05	-41.987		190	17.237	-12.773	-13.729	-32.638		208	-40.43	8.77	-21.735	-46.72
	166		-13.057	4.014	11.414		191				-49.399		209	-23.59	-6.828	-8.04	-39.568
	167		-21.038	-4.351	-7.595		192				-34.434		210	-24.699	-3.378	-22.907	-58.239
	168		-16.398	-2.517	-22.62		193	-41.583	-23.824	1.332	24.998		211	10.751	-15.574	-8.491	-25.871
	169			-0.465	0.451		194	-33.332	-16.991	-20.722	-35.625		212	1.983	-49.757	-50.74	-20.507
	170	-24.005	11.425	-23.326	-33.229		195	-5.194	-23.463	-0.434	15.124		213	-17.723	-2.215	-1.005	4.399
	171	-29.599	-6.171	-50.853	-28.302		196	-31.734	-15.141	-5.111	24.775		214	-5.459	-26.241	-14.036	-14.47
	172	26.146	10.472	-26.8	-36.847		197	-60.397	-30.893	10.459	-33.36		215	-19.805	-6.715	-7.572	-7.399
	173	-36.365	-6.751		-60.077		198	-45.7	-2.627	-12.529	32.335		216	2.826	9.572	-12.858	4.537
	174	-2.995	-15.906				199	-18.783	-8.219	-5.908	4.512		217	7.972	-18.935	3.033	-26.565
	175	2.974	6.282	-9.462	-13.355		200	-32.017	-2.771	2.408	32.681		218	-16.148	10.69	1.61	0.675
	176	-23.24	-62.073	-28.225	-26.565		201	-23.381	-8.94	14.357	-3.721		219	-10.125	-19.299	-3.19	29.274
	177	16.07	-26.565	24.747	-0.465		178	1.123	-36.87	8.727	-14.71		224	-20.466	12.283	-1.652	-1.245
	202	-13.85	6.684	25.697	32.082		179	-5.206	-22.107	-7.125	-28.072		225			0.507
	203	9.776	-24.775	-9.162	1.909		180	11.31	-0.565	-5.194	-21.801		181				-6.563
	204	-21.801	1.754	-1.254	15.296								182				14.176
	220	2.631	-14.58	-7.253	4.044								183				19.467
	221	26.271	-9.599	16.147	-24.146								184				5.932
	222	-7.333	11.36	16.423	9.416
	223	-18.647	2.876	-3.24	5.457
	185	24.793	47.261	17.148	-25.735
	186	29.578	11.051	2.246	-18.435
	total OHC						total OHC						total OHC
	WT sample 1						WT sample 2						WT sample 3
	Range	IHC	OHC1	OHC2	OHC3		Range	IHC	OHC1	OHC2	OHC3		Range	IHC	OHC1	OHC2	OHC3
	"-180< ~ <= -150"	0	0	0	0		"-180< ~ <= -150"	0	0	0	0		"-180< ~ <= -150"	0	0	0	0
	"-150< ~ <=-120"	0	0	0	0		"-150< ~ <=-120"	0	0	0	0		"-150< ~ <=-120"	0	0	0	0
	"-120<= ~ <-90"	0	0	0	0		"-120<= ~ <-90"	0	0	0	0		"-120<= ~ <-90"	0	0	0	0
	"-90<= ~ <-60"	0	1	0	2		"-90<= ~ <-60"	1	0	0	0		"-90<= ~ <-60"	0	0	0	0
	"-60<= ~ <-30"	3	1	3	13		"-60<= ~ <-30"	5	2	1	29		"-60<= ~ <-30"	4	3	2	6
	"-30<= ~ <0"	44	36	33	35		"-30<= ~ <0"	26	43	45	24		"-30<= ~ <0"	40	37	45	29
	"0<= ~ <30"	24	34	36	22		"0<= ~ <30"	26	22	18	13		"0<= ~ <30"	24	33	25	32
	"30< ~ <=60"	0	1	0	1		"30< ~ <=60"	0	0	1	3		"30< ~ <=60"	0	0	0	11
	"60< ~ <=90"	0	0	0	1		"60< ~ <=90"	0	0	0	0		"60< ~ <=90"	0	0	0	0
	"90< ~ <=120"	0	0	0	0		"90< ~ <=120"	0	0	0	0		"90< ~ <=120"	0	0	0	0
	"120< ~ <=150"	0	0	0	0		"120< ~ <=150"	0	0	0	0		"120< ~ <=150"	0	0	0	0
	"150< ~ <=180"	0	0	0	0		"150< ~ <=180"	0	0	0	0		"150< ~ <=180"	0	0	0	0
	total count	71	73	72	74		total count	58	67	65	69		total count	68	73	72	78
		% of total OHC>30' deviation						% of total OHC>30' deviation						% of total OHC>30' deviation
		sample 1:	0.105023					sample 2:	0.179104					sample 3:	0.0986547
		% of total HC>30' deviation						% of total HC>30' deviation						% of total HC>30' deviation
		sample 1:	0.0896552					sample 2:	0.162162					sample 3:	0.0893471
	WT sample 1 base						WT sample 2 base						WT sample 3 base
	Range	IHC	OHC1	OHC2	OHC3		Range	IHC	OHC1	OHC2	OHC3		Range	IHC	OHC1	OHC2	OHC3
	"-180< ~ <= -150"	0	0	0	0		"-180< ~ <= -150"	0	0	0	0		"-180< ~ <= -150"	0	0	0	0
	"-150< ~ <=-120"	0	0	0	0		"-150< ~ <=-120"	0	0	0	0		"-150< ~ <=-120"	0	0	0	0
	"-120<= ~ <-90"	0	0	0	0		"-120<= ~ <-90"	0	0	0	0		"-120<= ~ <-90"	0	0	0	0
	"-90<= ~ <-60"	0	0	0	0		"-90<= ~ <-60"	0	0	0	0		"-90<= ~ <-60"	0	0	0	0		% of total OHC>30' deviation
	"-60<= ~ <-30"	0	0	0	1		"-60<= ~ <-30"	0	0	1	3		"-60<= ~ <-30"	0	0	0	0		sample 1:	#NAME?
	"-30<= ~ <0"	17	10	12	10		"-30<= ~ <0"	6	21	19	14		"-30<= ~ <0"	17	16	24	18
	"0<= ~ <30"	8	15	13	13		"0<= ~ <30"	17	5	5	8		"0<= ~ <30"	9	15	5	13
	"30< ~ <=60"	0	0	0	0		"30< ~ <=60"	0	0	0	1		"30< ~ <=60"	0	0	0	0
	"60< ~ <=90"	0	0	0	1		"60< ~ <=90"	0	0	0	0		"60< ~ <=90"	0	0	0	0
	"90< ~ <=120"	0	0	0	0		"90< ~ <=120"	0	0	0	0		"90< ~ <=120"	0	0	0	0
	"120< ~ <=150"	0	0	0	0		"120< ~ <=150"	0	0	0	0		"120< ~ <=150"	0	0	0	0
	"150< ~ <=180"	0	0	0	0		"150< ~ <=180"	0	0	0	0		"150< ~ <=180"	0	0	0	0
	total count	25	25	25	25		total count	23	26	25	26		total count	26	31	29	31
		% of total basal OHC>30' deviation						% of total basal OHC>30' deviation						% of total basal OHC>30' deviation
		sample 1:	0.0266667					sample 2:	0.0649351					sample 3:	0
	WT sample 1 mid						WT sample 2 mid						WT sample 3 mid
	Range	IHC	OHC1	OHC2	OHC3		Range	IHC	OHC1	OHC2	OHC3		Range	IHC	OHC1	OHC2	OHC3
	"-180< ~ <= -150"	0	0	0	0		"-180< ~ <= -150"	0	0	0	0		"-180< ~ <= -150"	0	0	0	0
	"-150< ~ <=-120"	0	0	0	0		"-150< ~ <=-120"	0	0	0	0		"-150< ~ <=-120"	0	0	0	0
	"-120<= ~ <-90"	0	0	0	0		"-120<= ~ <-90"	0	0	0	0		"-120<= ~ <-90"	0	0	0	0
	"-90<= ~ <-60"	0	0	0	1		"-90<= ~ <-60"	0	0	0	0		"-90<= ~ <-60"	0	0	0	0
	"-60<= ~ <-30"	2	1	1	9		"-60<= ~ <-30"	0	0	0	19		"-60<= ~ <-30"	0	0	0	0
	"-30<= ~ <0"	16	13	9	13		"-30<= ~ <0"	15	10	15	5		"-30<= ~ <0"	15	13	10	4
	"0<= ~ <30"	7	10	14	2		"0<= ~ <30"	4	15	8	1		"0<= ~ <30"	11	13	16	12
	"30< ~ <=60"	0	0	0	0		"30< ~ <=60"	0	0	1	0		"30< ~ <=60"	0	0	0	11
	"60< ~ <=90"	0	0	0	0		"60< ~ <=90"	0	0	0	0		"60< ~ <=90"	0	0	0	0
	"90< ~ <=120"	0	0	0	0		"90< ~ <=120"	0	0	0	0		"90< ~ <=120"	0	0	0	0
	"120< ~ <=150"	0	0	0	0		"120< ~ <=150"	0	0	0	0		"120< ~ <=150"	0	0	0	0
	"150< ~ <=180"	0	0	0	0		"150< ~ <=180"	0	0	0	0		"150< ~ <=180"	0	0	0	0
	total count	25	24	24	25		total count	19	25	24	25		total count	26	26	26	27
		% of total mid OHC>30' deviation						% of total mid OHC>30' deviation						% of total mid OHC>30' deviation
		sample 1:	0.164384					sample 2:	0.27027					sample 3:	0.139241
	WT sample 1 apex						WT sample 2 apex						WT sample 3 apex
	Range	IHC	OHC1	OHC2	OHC3		Range	IHC	OHC1	OHC2	OHC3		Range	IHC	OHC1	OHC2	OHC3
	"-180< ~ <= -150"	0	0	0	0		"-180< ~ <= -150"	0	0	0	0		"-180< ~ <= -150"	0	0	0	0
	"-150< ~ <=-120"	0	0	0	0		"-150< ~ <=-120"	0	0	0	0		"-150< ~ <=-120"	0	0	0	0
	"-120<= ~ <-90"	0	0	0	0		"-120<= ~ <-90"	0	0	0	0		"-120<= ~ <-90"	0	0	0	0
	"-90<= ~ <-60"	0	1	0	1		"-90<= ~ <-60"	1	0	0	0		"-90<= ~ <-60"	0	0	0	0
	"-60<= ~ <-30"	1	0	2	3		"-60<= ~ <-30"	5	2	0	7		"-60<= ~ <-30"	4	3	2	6
	"-30<= ~ <0"	11	13	12	12		"-30<= ~ <0"	5	12	11	5		"-30<= ~ <0"	8	8	11	7
	"0<= ~ <30"	9	9	9	7		"0<= ~ <30"	5	2	5	4		"0<= ~ <30"	4	5	4	7
	"30< ~ <=60"	0	1	0	1		"30< ~ <=60"	0	0	0	2		"30< ~ <=60"	0	0	0	0
	"60< ~ <=90"	0	0	0	0		"60< ~ <=90"	0	0	0	0		"60< ~ <=90"	0	0	0	0
	"90< ~ <=120"	0	0	0	0		"90< ~ <=120"	0	0	0	0		"90< ~ <=120"	0	0	0	0
	"120< ~ <=150"	0	0	0	0		"120< ~ <=150"	0	0	0	0		"120< ~ <=150"	0	0	0	0
	"150< ~ <=180"	0	0	0	0		"150< ~ <=180"	0	0	0	0		"150< ~ <=180"	0	0	0	0
	total count	21	24	23	24		total count	16	16	16	18		total count	16	16	17	20
		% of total apical OHC>30' deviation						% of total apical OHC>30' deviation						% of total apical OHC>30' deviation
		sample 1:	0.126761					sample 2:	0.22					sample 3:	0.207547

## Sheet: Ift88 cKO PCP
	sample1						sample2						sample3
	Raw data	IHC	OHC1	OHC2	OHC3		Raw data	IHC	OHC1	OHC2	OHC3		Raw data	IHC	OHC1	OHC2	OHC3
base	1	-26.565	10.774	75.964	-32.211	base	38	-4.509	-61.631	59.744	-45	base	64	-20.892		112.606	-34.249
	2	18.387	51.376	6.193	35.895		39	35.538	-76.517	30.964	-54.462		65	55.188	145.84	-21.811	-35.538
	3	3.374	-3.814	-33.69	41.987		40	17.095	10.322	-11.31	78.69		66	-37.053	173.308	160.79	71.565
	4	-26.811	-40.236	-21.038	-126.027		41	42.879	-22.443	-50.711	80.492		67	-27.326	-9.759	40.451	-22.921
	5	-22.59	-26.565	37.569	-68.199		42	-10.236	-160.821	59.036	35.276		68	-27.459	-154.486	10.125	115.093
	6	8.043	-131.987	52.431	-55.305		43	-40.601	-142.125	70.15	-29.619		69	-18.482	-24.029	-71.319	-38.016
	7	21.801	118.61	-26.565	52.431		44	9.534	137.121	47.175	57.186		70	-22.935	-141.34	-11.447	-18.853
	8	-4.654	12.529	-64.983	58.392		45	1.464	11.535	19.76	44.446		71	11.186	95.194	25.935	154.636
	9	-26.565	-123.69	10.62	50.194		46	22.815	99.807	-29.903	61.631		72	26.329	74.941	-78.65	160.931
	10	34.509	-45	-53.13	-26.565		47	38.894	152.301	12.036	-112.443		73	-22.14	137.231	25.661	125.131
	11	4.782	137.726	-39.806	63.435		48	5.956	133.174	121.866	-36.481		74	-3.659	107.072	27.049	-10.334
	12	5	39.289	-14.036	155.556		49	0.602	126.097	-132.391	32.969		75	1.246	77.912	-54.819	125.417
	13	-10.528	38.66	81.87	-32.471		50	-35.833	133.175	-98.13	49.873		76	-11.531	149.886	-131.163	101.11
	14	-26.565	-39.289	-3.013	24.775		51	-5.924	96.629	-133.877	57.057		77	-7.581	-76.421	26.651	38.333
	15	19.983	153.435	-47.49	-42.51		52	-23.694	-19.466	-28.774	18.688		78	45.26	72.921	32.867	-76.504
	16	9.462	27.955	-3.013	70.017		53	-9.399	-114.039	-92.992	80.852		79		149.946	-37.525	54.039
	17	0.194	165.069	87.973	48.814		54	-9.6	-153.359	-28.142	42.084		80		41.969	26.457	41.991
	18	-7.62	-132.51	-34.695	37.875		55	24.775	-127.986	-38.991	78.459		81		-96.52	-44.119	16.983
	19	7.095	56.31	3.366	90.165		56	-3.13	-68.567	-11.13	142.728		82		-10.822	3.122	144.728
	20	-38.66	127.569	41.987	33.69		57	-6.07	22.946	8.15	22.203		83		24.007	41.249	-46.038
	21	0.945	180	23.199	-8.13		58	25.577	27.69	17.687	59.349		84		-22.238	-2.642	78.906
	22	6.31	-126.027	-4.086	-75.069		59	-21.482	-138.25	-26.565	43.56		85		-22.317	-19.938	-65.095
	23	-7.291	-8.13	77.905	35.538		60	-4.259	143.13	8.726	-24.075		86		-24.305		-12.555
	24	-0.165	50.925	-54.462	48.013		61	10.17	143.13	-22.443	-33.619		87		-48.28		-73.565
	25	16.483	-142.125	47.49	-8.13		62	17.439	62.368	-7.681	64.681		88		123.825		-64.183
	26	-44.799	-156.801	-24.775	-45.126		63	47.364	153.396	167.455	-13.295		89		-39.668		-10.346
	27	3.576	33.69	-126.027	-33.69								90		-122.241		-51.693
	28	49.086	154.622	42.51	153.435								91		133.11		-24.611
	29	-1.34	18.435	20.556	-5.194								92		131.34		-44.31
	30	6.501	36.027	41.186	74.745								93		23.716		-17.685
	31	3.881	37.875	14.036	-30.256								94		44.459		-64.942
	32	-4.462	41.634	120.964	45								95		-60.83		6.288
	33	35.538	63.435	37.875	69.444								96		-45.811		-14.812
	34	45	114.775	26.565	36.87								97		-96.356		-42.192
	35	-14.931	-35.538	28.61	32.471								98		-129.018		-61.751
	36	5	-131.987	12.095	82.405								99		-30.578		-64.446
	37	-2.879	-145.305	23.962	63.435								100		8.184		46.855
					8.653								101		141.093		42.939
					24.305								102				7.953
					-35.926								103				-34.852
					-38.48								104				-63.435
					14.541								105				-51.901
mid	106	1.432	37.983	-23.905	9.4	mid	136	37.601	-72.33	35.356	-44.515	mid	176	11.571	30.488	41.501	57.902
	107	33.906	39.303	-94.156	61.426		137	-4.462	-16.52	-31.166	47.665		177	-43.337	46.71	-96.957	68.61
	108	28.963	-148.32	-19.95	4.281		138	48.035	-69.241	75.899	-64.123		178	-3.54	68.465	-67.472	45.628
	109	-31.264	-15.101	-128.66	5.725		139	32.656	-125.806	136.848	72.398		179	32.037	-27.38	-12.767	-37.039
	110	-22.152	-45.868	-65.446	95.861		140	21.828	136.271	44.346	66.859		180	0.194	109.909	-9.833	56.104
	111	-47.498	-56.15	-66.275	79.16		141	-9.623	142.931	-74.109	50.29		181	25.688	-58.763	36.941	2.914
	112	32.044	54.476	80.838	-71.308		142	42.61	34.902	-88.898	65.257		182	-6.229	128.617	21.766	35.984
	113	37.425	87.665	35.074	48.928		143	-5.014	6.953	10.418	-43.578		183	11.607	-54.039	44.067	-52.35
	114	-22.631	149.485	-64.342	71.274		144	-13.791	-73.32	16.113	-76.504		184	-2.096	46.979	31.159	-56.101
	115	36.973	126.208	19.026	-77.212		145	-8.576	81.604	-78.528	-37.657		185	-2.352	7.592	-22.782	133.802
	116	10.008	-43.937	-31.675	69.193		146	-4.577	-56.575	-33.245	127.496		186	-7.848	-51.104	78.924	-36.87
	117	5.331	-121.188	-88.48	-72.224		147	45.343	-54.058	54.107	53.228		187	20.832	93.943	-6.012	2.976
	118	26.565	-49.399	6.16	19.607		148	-13.973	-72.222	-164.982	-162.468		188	-7.197	-23.642	-14.313	46.975
	119	-19.29	18.007	-43.648	6.186		149	-29.76	-41.285	9.819	55.464		189		-41.738	152.532	-52.549
	120	-8.13	17.261	-97.322	-35.451		150	-2.249	169.617	36.26	-19.654		190		-35.916	65.726	48.867
	121	-34.935	93.19	36.825	90.153		151	-13.581	-112.856	34.821	67.056		191		60.642	-21.548	115.974
	122	-1.565	-26.008	160.789	-41.746		152	-0.983	-144.248	-34.751	50.992		192		-17.029	-39.472	-63.435
	123	16.064	-34.339	127.131	55.289		153	9.527	137.253	75.907	-7.256		193		33.341	65.154	68.072
	124	-5.981	81.223	49.517	-20.397		154	-41.286	-71.367	132.862	-117.544		194		59.049	11.511	52.026
	125	6.782	-39.124	-84.477	-9.067		155	-24.249	76.635	-97.658	127.556		195		-11.862	-30.53	26.71
	126	-33.184	-37.58	11.558	-15.871		156	-11.746	-117.897	52.496	48.824		196		51.904	4.328	12.875
	127	43.912	143.13	43.264	-105.174		157	-3.337	-57.524	-86.057	40.775		197		-69.205	37.102	-106.113
	128	13.227	-21.557	-80.049	68.839		158	25.193	18.732	-74.587	-46.736		198		-69.619	137.337	-87.776
	129	25.063	31.789	-77.861	-36.027		159	-9.702	-32.152	74.985	90.22		199		-54.851	47.91	153.154
	130	-31.101	153.172	28.002	147.588		160	26.21	5.259	18.911	-60.553		200		-11.87	78.761	35.342
	131	34.396	-161.889	-48.013	-28.61		161	-9.721	-45.955	38.395	9.501		201		14.588	31.34	28.161
	132	-6.352	48.217	56.634	93.421		162	-32.449	122.778	-15.847	72.316		202		3.953	38.996	53.329
	133	-19.028	-7.686	-160.428	95.59		163		-110.726	-57.771	87.198		203		35.538	40.365	-45.764
	134	1.343	50.44	10.125	4.977		164		16.077	67.109	88.781		204		-64.537	-39.859	8.838
	135	37.115	-161.412	39.222	29.391		165		-12.43	46.692	60.836		205		4.604	-53.605	37.692
							166		114.944	-85.648	81.67		206		-24.05	38.838	44.63
							167		-33.165	-40.36	69.706		207		-28.849	-51.718	-41.192
							168		-73.988	-29.038	-9.324		208		83.225	2.291	3.538
							169		-80.538	66.938	44.534		209		-70.769	28.301	61.14
							170		33.111	22.098	73.213		210		29.361	-30.624	-7.595
							171		-56.634	58.153	-46.432		211		-38.19	5.138	36.214
							172		-42.722	-75.739	-56.55		212		-68.749	-18.083	48.378
							173		34.369	-67.094	53.957		213		-20.854	54.462	-70.539
							174		50.556	29.745	60.495		214		-79.074	-28.826	-94.268
							175		32.998	-77.977	66.801		215		31.862	-68.816	53.006
													216		51.935	39.518	-86.886
													217		61.057	-51.388	-88.059
													218		-33.456	29.218	6.302
													219		-42.61	-29.892	-111.108
													220		-52.091	-95.668	16.519
													221		59.123	24.95	81.001
													222		-71.306	47.333	-37.132
													223		-103.912	43.272
													224		65.81	-25.922
													225		70.965	-63.134
													226		74.637	81.35
													227		-11.667	34.475
													228		20.864	9.772
													229		14.246	24.06
													230		-28.436	-65.283
													231		33.683	6.766
													232		-76.942	-49.353
													233		-79.601	-146.323
													234		3.72	-8.729
													235			104.124
													236			-10.25
													237			-46.912
Aepx	238	7.818	21.908	58.736	-133.616	Aepx	262	28.197	20.031	48.096	-99.611	Aepx	296	-30.947	98.048	-49.195	-7.91
	239	1.273	32.471	61.572	-124.335		263	3.151	-35.175	19.305	-101.197		297	19.874	-66.06	16.528	80.134
	240	3.502	133.106	38.071	120.925		264	-36.374	5.257	20.956	-110.809		298	10.155	-110.131	-52.238	10.847
	241	2.203	29.096	46.637	95.194		265	-20.906	39.289	66.959	-105.604		299	2.863	-59.001	-18.345	69.221
	242	-33.847	19.296	62.67	-100.834		266	14.968	9.995	18.678	-100.443		300	15.892	-48.9	20.659	18.933
	243	8.392	-84.141	-47.794	93.324		267	18.547	-52.108	34.98	107.317		301	10.465	-32.372	87.845	77.238
	244	6.123	39.818	47.231	54.788		268	-10.14	-99.605	-11.703	107.317		302	10.725	93.528	71.565	30.51
	245	21.908	-98.604	-42.622	71.388		269	-5.339	-8.427	6.059	22.669		303	3.282	73.33	40.934	20.726
	246	-10.238	124.772	17.819	4.098		270	0.11	59.164	6.611	91.077		304	14.281	30.331	50.047	-12.545
	247	8.608	-96.746	-85.591	46.063		271	-32.378	50.398	-92.104	104.744		305	-37.057	36.027	-14.415	-21.91
	248	48.349	50.297	-46.123	70.133		272	16.287	42.866	7.905	-100.923		306	15.695	-50.721	-15.727	12.095
	249	-34.9	160.067	-54.265	16.401		273	-12.569	-60.945	34.475	45.551		307	-1.187	29.971	8.62	26.343
	250	34.196	-149.937	4.457	-67.688		274	-19.624	-65.232	135.903	-86.987		308	-10.94	16.189	124.813	-31.782
	251	-29.949	-81.035	68.355	104.047		275	7.061	-22.917	44.358	-54.291		309	-11.787	10.462	117.223	4.086
	252	-3.499	-27.419	78.743	54.553		276	21.125	-60.161	104.036	-82.965		310	-13.215	28.819	149.036	32.575
	253	23.764	-126.911	19.997	-99.713		277	8.934	8.24	99.999	-15.703		311	-18.102	16.139	-56.461	-13.38
	254	-5.43	-38.834	-62.437	98.746		278	-1.416	21.892	107.735	-54.762		312	-15.995	8.437	-72.938	3.228
	255	-36.298	51.62	110.068	-75.203		279	-1.699	-46.909	100.219	-88.995		313	-11.611	-67.194	-5.241	-139.955
	256	34.393	11.298	-108.435	-119.438		280	7.601	-25.878	85.888	-95.16		314	30.569	-86.21	-50.964	27.997
	257	2.063	37.002	25.667			281	37.485	-141.369	57.691	-55.954		315	25.954	4.073	44.956	41.593
	258	-44.55	27.224	-28.706			282	5.804	114.874	47.84	-91.487		316	25.295	19.766	-38.346	76.229
	259	-30.069	-10.167	-61.63			283	19.684	33.569	76.954	-88.506		317	7.383	74.255	-3.18	42.024
	260	0.251	-81.282	6.286			284	-8.499	5.164	51.221	-75.532		318	-16.452	6.34	59.036	70.006
	261	6.536	146.135	97.487			285	-8.409	-81.439	-22.977	-94.968		319	-10.332	56.132	5.194	30.627
							286	-45.216	-79.223	13.881	16.544		320	-25.556	-107.814	8.746	100.165
							287	4.696	68.735	76.345	-89.391		321	23.901	69.924	-32.471	-93.753
							288	-0.291	74.577	18.61	-105.259		322	11.911	124.301	-30.964	-3.717
							289	-17.166	-102.991	-17.572	-94.997		323		-89.249	-75.964	-97.229
							290	45	-115.886	85.002	-82.455		324		-15.512	-90.565	-102.319
							291	-30.964	45.827	-37.04	-76.088		325		-10.46	-75.881	79.504
							292	-25.538	91.853	37.558	-39.207		326		-83.535	-36.158	134.932
							293	-13.13	117.418	-3.082	-101.575		327		-93.054	64.745	-111.098
							294	19.036	-117.35	68.131	-25.861		328		-18.763	-41.111	-75.457
							295	-5.711	-59.905	23.199	-13.191		329		21.801	12.788	-68.486
													330		-54.132	10.112	-85.304
													331		-119.798	-26.139	4.677
													332		30.256	48.979	-28.61
													333		-119.501	50.332	-37.349
													334		4.97	20.98	-7.998
													335		-28.496	65.209	-28.722
													336		-79.38	-85.668	-108.929
													337		-52.125	-35.598	30.953
													338		0.265	5.161	-32.082
													339		37.875	-70.16	-88.942
													340		28.61	-31.115	-42.216
													341		36.87	90.236	28.155
													342		-10.905	11.041	-114.469
													343		81.18	-8.584	37.228
													344		5.675	-56.797	20.76
													345		7.075	4.086	-38.66
													346		105.82	4.043	-52.881
													347		77.195	-87.028	-110.537
													348		-96.121	-77.236	-33.184
													349		-65.739	-17.585	25.932
													350		59.22	-97.839	-20.514
													351		16.439		2.564
													352		96.551		53.13
													353		-35.676		-78.397
													354		-52.939		34.16
													355		3.025		-75.172
													356		107.78		-88.231
													357				60.404
													358				-11.372
													359				-23.321
													360				32.106
													361				-40.914
													362				-69.969
													363				67.38
													364				32.696
													365				17.021
													366				9.462
													367				15.945
													368				19.983
													369				-4.764
													370				-41.186
													371				29.055
													372				114.444
													373				48.814
													374				21.801
													375				18.435
													376				-66.801
													377				-74.745
													378				59.744
													379				-26.565
	Ift88 cKO sample 1						Ift88 cKO sample 2						Ift88 cKO sample 3
	Range	IHC	OHC1	OHC2	OHC3		Range	IHC	OHC1	OHC2	OHC3		Range	IHC	OHC1	OHC2	OHC3
	"-180< ~ <= -150"	0	3	1	0		"-180< ~ <= -150"	0	2	1	1		"-180< ~ <= -150"	0	1	0	0
	"-150< ~ <=-120"	0	11	2	3		"-150< ~ <=-120"	0	6	2	0		"-150< ~ <=-120"	0	3	2	1
	"-120<= ~ <-90"	0	2	3	4		"-120<= ~ <-90"	0	8	4	14		"-120<= ~ <-90"	0	9	4	10
	"-90<= ~ <-60"	0	3	11	7		"-90<= ~ <-60"	0	15	9	11		"-90<= ~ <-60"	0	18	13	23			WT	Ift88 cKO
	"-60<= ~ <-30"	12	12	13	12		"-60<= ~ <-30"	8	13	8	14		"-60<= ~ <-30"	4	22	24	26		Sample1	0.105023	0.739927
	"-30<= ~ <0"	26	9	10	8		"-30<= ~ <0"	40	7	14	9		"-30<= ~ <0"	25	21	24	22		Sample2	0.179104	0.77
	"0<= ~ <30"	39	11	20	13		"0<= ~ <30"	28	14	20	5		"0<= ~ <30"	22	28	30	32		Sample3	0.0986547	0.665245
	"30< ~ <=60"	14	20	17	18		"30< ~ <=60"	11	11	21	19		"30< ~ <=60"	4	20	24	32
	"60< ~ <=90"	0	3	9	13		"60< ~ <=90"	0	5	12	19		"60< ~ <=90"	0	15	9	14		p-value by t-test	0.000558893
	"90< ~ <=120"	0	3	2	9		"90< ~ <=120"	0	6	4	5		"90< ~ <=120"	0	9	4	5		independent sampel t-test
	"120< ~ <=150"	0	8	2	2		"120< ~ <=150"	0	10	4	3		"120< ~ <=150"	0	10	3	5
	"150< ~ <=180"	0	6	1	2		"150< ~ <=180"	0	3	1	0		"150< ~ <=180"	0	1	2	3
	total count	91	91	91	91		total count	87	100	100	100		total count	55	157	139	173
		% of total OHC>30' deviation						% of total OHC>30' deviation						% of total OHC>30' deviation
		sample 1:	0.739927					sample 2:	0.77					sample 3:	0.665245
		% of total HC>30' deviation						% of total HC>30' deviation						% of total HC>30' deviation
		sample 1:	0.626374					sample 2:	0.645995					sample 3:	0.610687
	Ift88 cKO sample 1						Ift88 cKO sample 2						Ift88 cKO sample 3
	Range	IHC	OHC1	OHC2	OHC3		Range	IHC	OHC1	OHC2	OHC3		Range	IHC	OHC1	OHC2	OHC3
	"-180< ~ <= -150"	0	1	0	0		"-180< ~ <= -150"	0	2	0	0		"-180< ~ <= -150"	0	1	0	0
	"-150< ~ <=-120"	0	7	1	1		"-150< ~ <=-120"	0	3	2	0		"-150< ~ <=-120"	0	3	1	0
	"-120<= ~ <-90"	0	0	0	0		"-120<= ~ <-90"	0	1	2	1		"-120<= ~ <-90"	0	2	0	0
	"-90<= ~ <-60"	0	0	1	2		"-90<= ~ <-60"	0	3	0	0		"-90<= ~ <-60"	0	2	2	8
	"-60<= ~ <-30"	2	4	6	9		"-60<= ~ <-30"	2	0	2	4		"-60<= ~ <-30"	1	4	3	9
	"-30<= ~ <0"	14	3	7	4		"-30<= ~ <0"	10	2	8	3		"-30<= ~ <0"	9	6	4	8
	"0<= ~ <30"	17	4	10	4		"0<= ~ <30"	10	4	5	2		"0<= ~ <30"	3	3	7	3
	"30< ~ <=60"	4	9	7	13		"30< ~ <=60"	4	0	4	9		"30< ~ <=60"	2	2	3	5
	"60< ~ <=90"	0	1	4	6		"60< ~ <=90"	0	1	1	6		"60< ~ <=90"	0	3	0	2
	"90< ~ <=120"	0	2	0	1		"90< ~ <=120"	0	2	0	0		"90< ~ <=120"	0	2	1	2
	"120< ~ <=150"	0	2	1	0		"120< ~ <=150"	0	6	1	1		"120< ~ <=150"	0	8	0	3
	"150< ~ <=180"	0	4	0	2		"150< ~ <=180"	0	2	1	0		"150< ~ <=180"	0	1	1	2
	total count	37	37	37	42		total count	26	26	26	26		total count	15	37	22	42
		% of total basal OHC>30' deviation						% of total basal OHC>30' deviation						% of total basal OHC>30' deviation
		sample 1:	0.724138					sample 2:	0.692308					sample 3:	0.693069
	Ift88 cKO sample 1						Ift88 cKO sample 2						Ift88 cKO sample 3
	Range	IHC	OHC1	OHC2	OHC3		Range	IHC	OHC1	OHC2	OHC3		Range	IHC	OHC1	OHC2	OHC3
	"-180< ~ <= -150"	0	2	1	0		"-180< ~ <= -150"	0	0	1	1		"-180< ~ <= -150"	0	0	0	0
	"-150< ~ <=-120"	0	2	1	0		"-150< ~ <=-120"	0	2	0	0		"-150< ~ <=-120"	0	0	1	0
	"-120<= ~ <-90"	0	0	2	1		"-120<= ~ <-90"	0	3	1	1		"-120<= ~ <-90"	0	1	2	3
	"-90<= ~ <-60"	0	0	7	3		"-90<= ~ <-60"	0	7	9	3		"-90<= ~ <-60"	0	9	4	5
	"-60<= ~ <-30"	5	7	3	3		"-60<= ~ <-30"	2	9	5	6		"-60<= ~ <-30"	1	10	9	8
	"-30<= ~ <0"	8	4	2	4		"-30<= ~ <0"	16	2	2	3		"-30<= ~ <0"	6	10	12	1
	"0<= ~ <30"	10	2	5	7		"0<= ~ <30"	4	4	6	1		"0<= ~ <30"	5	8	11	9
	"30< ~ <=60"	7	6	6	2		"30< ~ <=60"	5	5	9	9		"30< ~ <=60"	1	11	15	14
	"60< ~ <=90"	0	2	1	5		"60< ~ <=90"	0	2	5	13		"60< ~ <=90"	0	7	5	4
	"90< ~ <=120"	0	1	0	4		"90< ~ <=120"	0	1	0	1		"90< ~ <=120"	0	2	1	1
	"120< ~ <=150"	0	3	1	1		"120< ~ <=150"	0	4	2	2		"120< ~ <=150"	0	1	1	1
	"150< ~ <=180"	0	1	1	0		"150< ~ <=180"	0	1	0	0		"150< ~ <=180"	0	0	1	1
	total count	30	30	30	30		total count	27	40	40	40		total count	13	59	62	47
		% of total mid OHC>30' deviation						% of total mid OHC>30' deviation						% of total mid OHC>30' deviation
		sample 1:	0.733333					sample 2:	0.85					sample 3:	0.696429
	Ift88 cKO sample 1						Ift88 cKO sample 2						Ift88 cKO sample 3
	Range	IHC	OHC1	OHC2	OHC3		Range	IHC	OHC1	OHC2	OHC3		Range	IHC	OHC1	OHC2	OHC3
	"-180< ~ <= -150"	0	0	0	0		"-180< ~ <= -150"	0	0	0	0		"-180< ~ <= -150"	0	0	0	0
	"-150< ~ <=-120"	0	2	0	2		"-150< ~ <=-120"	0	1	0	0		"-150< ~ <=-120"	0	0	0	1
	"-120<= ~ <-90"	0	2	1	3		"-120<= ~ <-90"	0	4	1	12		"-120<= ~ <-90"	0	6	2	7
	"-90<= ~ <-60"	0	3	3	2		"-90<= ~ <-60"	0	5	0	8		"-90<= ~ <-60"	0	7	7	10
	"-60<= ~ <-30"	5	1	4	0		"-60<= ~ <-30"	4	4	1	4		"-60<= ~ <-30"	2	8	12	9
	"-30<= ~ <0"	4	2	1	0		"-30<= ~ <0"	14	3	4	3		"-30<= ~ <0"	10	5	8	13
	"0<= ~ <30"	12	5	5	2		"0<= ~ <30"	14	6	9	2		"0<= ~ <30"	14	17	12	20
	"30< ~ <=60"	3	5	4	3		"30< ~ <=60"	2	6	8	1		"30< ~ <=60"	1	7	6	13
	"60< ~ <=90"	0	0	4	2		"60< ~ <=90"	0	2	6	0		"60< ~ <=90"	0	5	4	8
	"90< ~ <=120"	0	0	2	4		"90< ~ <=120"	0	3	4	4		"90< ~ <=120"	0	5	2	2
	"120< ~ <=150"	0	3	0	1		"120< ~ <=150"	0	0	1	0		"120< ~ <=150"	0	1	2	1
	"150< ~ <=180"	0	1	0	0		"150< ~ <=180"	0	0	0	0		"150< ~ <=180"	0	0	0	0
	total count	24	24	24	19		total count	34	34	34	34		total count	27	61	55	84
		% of total apical OHC>30' deviation						% of total apical OHC>30' deviation						% of total apical OHC>30' deviation
		sample 1:	0.776119					sample 2:	0.735294					sample 3:	0.625

## Sheet: Tbc1d32_bromi PCP
	sample1						sample2						sample3
	Raw data	IHC	OHC1	OHC2	Last OHC		Raw data	IHC	OHC1	OHC2	Last OHC		Raw data	IHC	OHC1	OHC2	Last OHC
base	1	-5.423	-10.666	6.232	21.096	base	23	24.644	10.559	49.496	-17.004	base	36	-2.045	8.13	-1.577	29.691
	2	-13.973	5.363	9.799	24.099		24	9.607	10.62	53.195	-18.118		37	-5.99	11.817	11.972	22.678
	3	-8.015	-4.64	13.402	20.914		25	12.642	13.383	61.846	-1.273		38	3.953	1.548	-2.759	21.198
	4	3.228	-23.759	2.95	15.725		26	16.621	13.383	47.952			39	-3.708	-20.472	-2.141	41.168
	5	-52.439	9.91	4.801	22.119		27		36.919				40	-4.122	2.291	6.596	45.151
	6	-4.377	13.175	12.01	13.087		28	-2.551	8.224	-3.589	9.733		41	10.395		-4.62	43.62
	7	41.237	41.257	9.246	14.63		29	-1.172	-10.883	-7.584	2.203		42	3.013
	8	24.896	36.337	24.796	20.54		30	1.753	-13.56	1.931	22.601		43	3.094
	9	37.315	10.242	3.12	48.814		31	-12.567	8.476	8.234	5.194		44	-12.335
	10		7.467	-1.921	59.708		32	0.255	2.011	12.084	19.983		45	1.219
	11				51.457		33	-3.937	2.746	1.848	19.983		46	3.007
	12				38.247		34	-8.084	12.4	0.63	18.86		47	0.65
	13				24.816		35	-4.48	11.924	0.64	0.546		48	3.693
	14				32.382		18	26.73	42.12	56.952	3.814		49	-29.011
	15				36.133		19	35.651	27.393	58.288	5.711		50	-13.385
	16				37.001								20	23.58	52.835	52.803	-21.545
	17				6.124								21	16.545	51.267	56.628	-0.725
													22	-5.81	22.38	55.778	-18.975
mid	51	-5.883	4.514	13.088	24.422	mid	65	-2.252	36.438	-31.535	-4.189	mid	80	-13.069	7.334	16.645	9.462
	52	10.713	-5.626	14.66	49.226		66	-8.259	-25.951	-14.564	18.311		81	-3.18	7.253	15.871	34.412
	53	14.783	-5.671	17.304	11.769		67	-25.614	-32.31	1.695	8.949		82	-6.006	5.572	-1.071	32.276
	54	-3.93	10.692	16.884	37.786		68	-22.359	-24.88	5.29	6.096		83	7.125	7.38	-0.299	51.776
	55	5.953	-6.29	3.531	56.916		69	-20.227	-43.833	3.635	7.058		84	7.214	4.17	5.545	51.009
	56	-7.052	6.802	-8.835	19.356		70	-23.685	-14.539	-3.474	27.108		85	4.485	8.115	4.715	45.13
	57	4.399	12.023	2.291	46.112		71	-29.304	-6.112	-1.441	5.242		86	9.706	11.775	5.44	8.479
	58	19.026	1.771	-16.717	56.933		72	-24.444	3.656	-15.127	17.847		87	4.121	8.433	12.249	9.1
	59	11.836	8.122	1.181	41.323		73	-32.399	-28.185	-30.536	50.777		88	-1.5	7.229	10.96	18.29
	60	18.866	7.62	8.723	48.215		74		-23.923	-10.812	10.305		89	3.779	-3.131	23.41	13.204
	61	-8.359	0.623	8.13	47.981		75		-33.009	12.978	34.146		90		5.857	6.212	10.281
	62	6.002	0.591	11.252	56.351		76		-9.135	-30.878	2.904		91				16.197
	63	9.467	5.711	0.165	41.079		77		-6.932		-6.856		92				23.24
	64						78		-30.116		24.444						35.446
							79		2.544		25.442
Apex	93	10.322	-4.977	5.082	25.01	Apex	119	19.328	-27.37	10.316	20.752	Apex	140	1.012	0.403	10.125	8.366
	94	15.014	7.386	29.093	-13.234		120	-3.321	-32.905	-2.361	8.486		141	16.39	6.981	28.511	2.426
	95	26.347	1.811	10.53	37.424		121	-22.214	46.312	-2.361	19.203		142	-44.929	9.904	21.615	16.074
	96	24.174	2.217	25.751	11.774		122	11.901	51.881	32.081	2.386		143	-21.571	-21.435	-0.854	39.19
	97	17.407	8.486	-5.248	-29.686		123	15.225	69.444	10.844	17.85		144	-5.301	-1.989	7.595	58.154
	98	-4.451	-1.128	-4.722	-8.53		124	10.291	46.258	38.669	1.091		145	-24.681	-3.347	12.555	10.091
	99	2.171	-20.835	-4.04	10.383		125	49.167	43.8	32.735	13.132		146	7.368	3.814	0.623	21.801
	100	10.634	-27.69	-8.265	2.874		126	31.399			-1.432		147	-14.801	4.304	1.909	34.406
	101	27.621	12.259	-2.187	-29.114		127	20.261			48.536		148	10.816	-6.889	0.651	26.565
	102		-8.384	-4.699	-10.487		128				27.427		149	-8.499	3.077	-1.685	56.31
	103			-2.663	52.074		129	-5.865			11.31		150	0.65	-8.562	-1.146	56.31
	104				36.798		130	5.023			0.963		151	-13.031	46.102	0.654	45
	105				50.988		131				18.99		152		0.603	0.68	24.897
	106				53.164		132				23.344		153			8.13
	107				43.903		133				20.294
	108				39.094		134				32.32
	109				24.322		135				21.033
	110				22.702		136				6.537
	111				13.258		137				13.445
	112				45.987		138				5.711
	113				2.459		139				8.313
	114				29.192
	115				23.074
	116				50.658
	117				38.442
	118				23.486
	bromi sample 1						bromi sample 2						bromi sample 3
	Range	IHC	OHC1	OHC2	OHC3		Range	IHC	OHC1	OHC2	OHC3		Range	IHC	OHC1	OHC2	OHC3
	"-180< ~ <= -150"	0	0	0	0		"-180< ~ <= -150"	0	0	0	0		"-180< ~ <= -150"	0	0	0	0
	"-150< ~ <=-120"	0	0	0	0		"-150< ~ <=-120"	0	0	0	0		"-150< ~ <=-120"	0	0	0	0
	"-120<= ~ <-90"	0	0	0	0		"-120<= ~ <-90"	0	0	0	0		"-120<= ~ <-90"	0	0	0	0
	"-90<= ~ <-60"	0	0	0	0		"-90<= ~ <-60"	0	0	0	0		"-90<= ~ <-60"	0	0	0	0
	"-60<= ~ <-30"	1	0	0	0		"-60<= ~ <-30"	1	5	3	0		"-60<= ~ <-30"	1	0	0	0
	"-30<= ~ <0"	9	11	10	5		"-30<= ~ <0"	17	11	9	6		"-30<= ~ <0"	18	7	9	3
	"0<= ~ <30"	19	20	24	24		"0<= ~ <30"	13	13	12	39		"0<= ~ <30"	21	22	22	18
	"30< ~ <=60"	2	2	0	27		"30< ~ <=60"	3	7	8	4		"30< ~ <=60"	0	3	3	15
	"60< ~ <=90"	0	0	0	0		"60< ~ <=90"	0	1	1	0		"60< ~ <=90"	0	0	0	0
	"90< ~ <=120"	0	0	0	0		"90< ~ <=120"	0	0	0	0		"90< ~ <=120"	0	0	0	0
	"120< ~ <=150"	0	0	0	0		"120< ~ <=150"	0	0	0	0		"120< ~ <=150"	0	0	0	0
	"150< ~ <=180"	0	0	0	0		"150< ~ <=180"	0	0	0	0		"150< ~ <=180"	0	0	0	0
	total count	31	33	34	56		total count	34	37	33	49		total count	40	32	34	36
		% of total OHC>30' deviation						% of total OHC>30' deviation						% of total OHC>30' deviation
		sample 1:	0.235772					sample 2:	0.243697					sample 3:	0.205882
	bromi sample 1						bromi sample 2						bromi sample 3
	Range	IHC	OHC1	OHC2	OHC3		Range	IHC	OHC1	OHC2	OHC3		Range	IHC	OHC1	OHC2	OHC3
	"-180< ~ <= -150"	0	0	0	0		"-180< ~ <= -150"	0	0	0	0		"-180< ~ <= -150"	0	0	0	0
	"-150< ~ <=-120"	0	0	0	0		"-150< ~ <=-120"	0	0	0	0		"-150< ~ <=-120"	0	0	0	0
	"-120<= ~ <-90"	0	0	0	0		"-120<= ~ <-90"	0	0	0	0		"-120<= ~ <-90"	0	0	0	0
	"-90<= ~ <-60"	0	0	0	0		"-90<= ~ <-60"	0	0	0	0		"-90<= ~ <-60"	0	0	0	0
	"-60<= ~ <-30"	1	0	0	0		"-60<= ~ <-30"	0	0	0	0		"-60<= ~ <-30"	0	0	0	0
	"-30<= ~ <0"	4	3	1	0		"-30<= ~ <0"	6	2	2	3		"-30<= ~ <0"	8	1	4	3
	"0<= ~ <30"	2	5	9	10		"0<= ~ <30"	7	11	6	10		"0<= ~ <30"	10	5	2	3
	"30< ~ <=60"	2	2	0	7		"30< ~ <=60"	1	2	5	0		"30< ~ <=60"	0	2	3	3
	"60< ~ <=90"	0	0	0	0		"60< ~ <=90"	0	0	1	0		"60< ~ <=90"	0	0	0	0
	"90< ~ <=120"	0	0	0	0		"90< ~ <=120"	0	0	0	0		"90< ~ <=120"	0	0	0	0
	"120< ~ <=150"	0	0	0	0		"120< ~ <=150"	0	0	0	0		"120< ~ <=150"	0	0	0	0
	"150< ~ <=180"	0	0	0	0		"150< ~ <=180"	0	0	0	0		"150< ~ <=180"	0	0	0	0
	total count	9	10	10	17		total count	14	15	14	13		total count	18	8	9	9
		% of total basal OHC>30' deviation						% of total basal OHC>30' deviation						% of total basal OHC>30' deviation
		sample 1:	0.243243					sample 2:	0.190476					sample 3:	0.307692
		% of total basal HC>30' deviation						% of total basal HC>30' deviation						% of total basal HC>30' deviation
		sample 1:	0.26087					sample 2:	0.160714					sample 3:	0.181818
	bromi sample 1						bromi sample 2						bromi sample 3
	Range	IHC	OHC1	OHC2	OHC3		Range	IHC	OHC1	OHC2	OHC3		Range	IHC	OHC1	OHC2	OHC3
	"-180< ~ <= -150"	0	0	0	0		"-180< ~ <= -150"	0	0	0	0		"-180< ~ <= -150"	0	0	0	0
	"-150< ~ <=-120"	0	0	0	0		"-150< ~ <=-120"	0	0	0	0		"-150< ~ <=-120"	0	0	0	0
	"-120<= ~ <-90"	0	0	0	0		"-120<= ~ <-90"	0	0	0	0		"-120<= ~ <-90"	0	0	0	0
	"-90<= ~ <-60"	0	0	0	0		"-90<= ~ <-60"	0	0	0	0		"-90<= ~ <-60"	0	0	0	0
	"-60<= ~ <-30"	0	0	0	0		"-60<= ~ <-30"	1	4	3	0		"-60<= ~ <-30"	0	0	0	0
	"-30<= ~ <0"	4	3	2	0		"-30<= ~ <0"	8	8	5	2		"-30<= ~ <0"	4	1	2	0
	"0<= ~ <30"	9	10	11	3		"0<= ~ <30"	0	2	4	11		"0<= ~ <30"	6	10	9	8
	"30< ~ <=60"	0	0	0	10		"30< ~ <=60"	0	1	0	2		"30< ~ <=60"	0	0	0	6
	"60< ~ <=90"	0	0	0	0		"60< ~ <=90"	0	0	0	0		"60< ~ <=90"	0	0	0	0
	"90< ~ <=120"	0	0	0	0		"90< ~ <=120"	0	0	0	0		"90< ~ <=120"	0	0	0	0
	"120< ~ <=150"	0	0	0	0		"120< ~ <=150"	0	0	0	0		"120< ~ <=150"	0	0	0	0
	"150< ~ <=180"	0	0	0	0		"150< ~ <=180"	0	0	0	0		"150< ~ <=180"	0	0	0	0
	total count	13	13	13	13		total count	9	15	12	15		total count	10	11	11	14
		% of total mid OHC>30' deviation						% of total mid OHC>30' deviation						% of total mid OHC>30' deviation
		sample 1:	0.25641					sample 2:	0.238095					sample 3:	0.166667
	bromi sample 1						bromi sample 2						bromi sample 3
	Range	IHC	OHC1	OHC2	OHC3		Range	IHC	OHC1	OHC2	OHC3		Range	IHC	OHC1	OHC2	OHC3
	"-180< ~ <= -150"	0	0	0	0		"-180< ~ <= -150"	0	0	0	0		"-180< ~ <= -150"	0	0	0	0
	"-150< ~ <=-120"	0	0	0	0		"-150< ~ <=-120"	0	0	0	0		"-150< ~ <=-120"	0	0	0	0
	"-120<= ~ <-90"	0	0	0	0		"-120<= ~ <-90"	0	0	0	0		"-120<= ~ <-90"	0	0	0	0
	"-90<= ~ <-60"	0	0	0	0		"-90<= ~ <-60"	0	0	0	0		"-90<= ~ <-60"	0	0	0	0
	"-60<= ~ <-30"	0	0	0	0		"-60<= ~ <-30"	0	1	0	0		"-60<= ~ <-30"	1	0	0	0
	"-30<= ~ <0"	1	5	7	5		"-30<= ~ <0"	3	1	2	1		"-30<= ~ <0"	6	5	3	0
	"0<= ~ <30"	8	5	4	11		"0<= ~ <30"	6	0	2	18		"0<= ~ <30"	5	7	11	7
	"30< ~ <=60"	0	0	0	10		"30< ~ <=60"	2	4	3	2		"30< ~ <=60"	0	1	0	6
	"60< ~ <=90"	0	0	0	0		"60< ~ <=90"	0	1	0	0		"60< ~ <=90"	0	0	0	0
	"90< ~ <=120"	0	0	0	0		"90< ~ <=120"	0	0	0	0		"90< ~ <=120"	0	0	0	0
	"120< ~ <=150"	0	0	0	0		"120< ~ <=150"	0	0	0	0		"120< ~ <=150"	0	0	0	0
	"150< ~ <=180"	0	0	0	0		"150< ~ <=180"	0	0	0	0		"150< ~ <=180"	0	0	0	0
	total count	9	10	11	26		total count	11	7	7	21		total count	12	13	14	13
		% of total apical OHC>30' deviation						% of total apical OHC>30' deviation						% of total apical OHC>30' deviation
		sample 1:	0.212766					sample 2:	0.314286					sample 3:	0.175

## Sheet: Cilk1 KO PCP
	Ick KO
		IHC	OHC1	OHC2	Last OHC			IHC	OHC1	OHC2	Last OHC			IHC	OHC1	OHC2	Last OHC
Base	1	-1.831	16.761	-5.526	8.169	base	13	-3.632	-3.35	-20.864	9.939	base	24	-9.906	-2.027	-4.936	-16.107
	2		-7.002	-0.274	21.767		14	1.903	-7.406	-7.858	9.627		25	9.396	-2.593	-7.305	-2.305
	3		-4.272	1.566	28.924		15	-15.889	-7.5	-4.566	9.408		26	-15.35	-14.599	1.254	-0.13
	4	0.873	2.291	0.293	21.08		16	-14.044	2.207	6.144	-0.152		27	-11.856	-1.115	-1.332	-23.164
	5	3.584	-16.757	24.651	30.77		17	4.031	5.434	-13.884	23.958		28	1.721	-0.632	2.586	-29.959
	6	2.117	-9.227	-3.736	-4.117		18	-10.894	7.509	-1.12	19.368		29	18.483	4.323	-7.32	-18.877
	7	-16.091	-16.298	-14.269	-0.8		19	7.511	-3.306	9.75	34.75		30		-12.817	-5.539	5.674
	8	-1.288	-2.033	14.576	-8.276		20		7.398	14.1	3.294		31		8.135	-14.376	18.88
	9	1.904	-0.226	-4.419	1.904		21		1.875	-2.37			32		2.892	-2.172	19.826
	10	-20.393	0.395	-3.865	-18.25		22	-28.421	-2.496	0.218	33.699		33		-10.129	-8.599	37.423
	11	-12.547	0.465	-13.703	0.427		23						34		1.396	3.413
	12	-11.023	-5.706	0.622	-35.414								35	-1.231	-1.764	0.558	15.918
														3.016	-1.441	2.449	34.579
mid	36	-28.421	0.71	11.367	-0.116	mid	51	5.822	25.474	40.853	15.533	mid	66	29.895	35.87	9.278	47.797
	37	-1.465	0.016	-9.936	-17.814		52	30.323	25.811	33.851	40.323		67	-31.343	19.864	45.164	20.569
	38	13.966	18.084	-2.953	-1.032		53	-0.909	22.974	50.912	19.432		68	27.113	35.978	-4.342	31.023
	39	-1.625	0.134	8.702	21.326		54	6.866	13.943	7.535	10.989		69	17.278	1.865	9.073	8.969
	40	2.921	-2.154	18.945	20.605		55	4.743	-4.014	4.911	29.441		70	0.196	-9.061	1.151	15.625
	41	15.975	-0.805	8.31	8.144		56	6.807	-7.744	6.676	-8.603		71	3.735	-6.76	1.576	18.458
	42	14.199	15.585	15.394	44.087		57	2.029	9.3	8.637	-7.94		72	7.742	0.011	11.083	24.007
	43	16.557	-7.95	30.728	27.886		58	3.053	-5.536	4.352	12.599		73	12.719	-4.41	12.186	22.92
	44	-1.032	32.703	-3.222	25.29		59	9.834	15.152	5.785	17.427		74	-2.562	-7.544	-16.386	23.768
	45	15.096	11.15	5.418	46.82		60	13.538	4.546	7.08	-4.605		75	-10.949	-5.003	-4.209	-6.494
	46	-13.726	0.165	29.779	37.857		61		2.806	-0.141			76	-18.317	-29.249	-12.617
	47	-12.14	18.066	7.2	29.975		62		2.207				77		0.761
	48		-39.05	-32.268			63	-0.442	-2.187	0.765	4.677		78		-9.92
	49		-17.337	-11.318			64	22.556	-1.061	9.261	26.003
	50	-21.457	8.676	0.185	0.03		65	1.691	-3.188	2.116	18.435
Aepx	79	-24.911	12.01	8.225	1.43	Apex	92	6.005	-48.283	21.005	13.079	Aepx	105	11.547	-16.924	4.754	35.528
	80	27.444	11.253	8.308	1.857		93	10	3.324	-8.421	33.688		106	-2.597	8.803	52.867	-6.221
	81	39.677	10.036	9.33	-3.115		94	-5.338	21.412	4.894	12.767		107	-4.236	-4.447	1.919	-0.199
	82	-4.236	7.532	0.109	-36.947		95	-44.405	10.952	1.916	13.172		108	-7.639	13.68	3.518	-29.482
	83	15.755	11.103	-12.281	11.814		96	-6.248	24.871	7.286	12.62		109	-1.139	0.969	-8.16	-3.439
	84	11.394	-14.657	21.509	11.294		97	22.359	8.928	7.636	14.186		110	9.609	9.23	-19.623	22.353
	85	34.789	5.81	5.581	36.231		98	6.976	4.934	-5.919	11.905		111	1.357	-0.877	13.258	9.659
	86		-9.462	-2.708	6.082		99	-12.12	4.399	6.239	2.399		112	18.642	6.274	2.851	36.853
	87		-20.951	4.488	0.731		100	-7.271	39.487	-5.922	7.46		113	-7.46	12.694	6.08
	88		4.044	16.028	10.449		101	-76.987	-10.562	29.492	-2.071		114	20.778	-1.773	-7.097
	89		32.773	19.647	15.128		102			-46.736	-10.374		115	-13.525	5.786	-13.927
	90		18.899	5.161	0.872		103			-4.809			116	16.074	-6.856	-14.021
	91				50.42		104	-0.8	1.496	4.044	5.592		117	10.53	15.912	13.246
													118	11.406	-4.04
													119		1.325
													120		4.942
	Ick KO sample 1						Ick KO sample 2						Ick KO sample 3
	Range	IHC	OHC1	OHC2	OHC3		Range	IHC	OHC1	OHC2	OHC3		Range	IHC	OHC1	OHC2	OHC3
	"-180< ~ <= -150"	0	0	0	0		"-180< ~ <= -150"	0	0	0	0		"-180< ~ <= -150"	0	0	0	0
	"-150< ~ <=-120"	0	0	0	0		"-150< ~ <=-120"	0	0	0	0		"-150< ~ <=-120"	0	0	0	0
	"-120<= ~ <-90"	0	0	0	0		"-120<= ~ <-90"	0	0	0	0		"-120<= ~ <-90"	0	0	0	0
	"-90<= ~ <-60"	0	0	0	0		"-90<= ~ <-60"	1	0	0	0		"-90<= ~ <-60"	0	0	0	0
	"-60<= ~ <-30"	0	1	1	2		"-60<= ~ <-30"	1	1	1	0		"-60<= ~ <-30"	1	0	0	0
	"-30<= ~ <0"	15	15	13	8		"-30<= ~ <0"	12	12	11	6		"-30<= ~ <0"	13	22	17	11
	"0<= ~ <30"	13	21	24	22		"0<= ~ <30"	17	22	22	24		"0<= ~ <30"	19	18	18	13
	"30< ~ <=60"	2	2	1	6		"30< ~ <=60"	1	1	3	4		"30< ~ <=60"	0	2	2	6
	"60< ~ <=90"	0	0	0	0		"60< ~ <=90"	0	0	0	0		"60< ~ <=90"	0	0	0	0
	"90< ~ <=120"	0	0	0	0		"90< ~ <=120"	0	0	0	0		"90< ~ <=120"	0	0	0	0
	"120< ~ <=150"	0	0	0	0		"120< ~ <=150"	0	0	0	0		"120< ~ <=150"	0	0	0	0
	"150< ~ <=180"	0	0	0	0		"150< ~ <=180"	0	0	0	0		"150< ~ <=180"	0	0	0	0
	total count	30	39	39	38		total count	32	36	37	34		total count	33	42	37	30
		% of total OHC>30' deviation						% of total OHC>30' deviation						% of total OHC>30' deviation
		sample 1:	0.112069					sample 2:	0.0934579					sample 3:	0.0917431
		% of total HC>30' deviation						% of total HC>30' deviation						% of total HC>30' deviation
		sample 1:	0.10274					sample 2:	0.0935252					sample 3:	0.0774648
	Ick KO sample 1						Ick KO sample 2						Ick KO sample 3
	Range	IHC	OHC1	OHC2	OHC3		Range	IHC	OHC1	OHC2	OHC3		Range	IHC	OHC1	OHC2	OHC3
	"-180< ~ <= -150"	0	0	0	0		"-180< ~ <= -150"	0	0	0	0		"-180< ~ <= -150"	0	0	0	0
	"-150< ~ <=-120"	0	0	0	0		"-150< ~ <=-120"	0	0	0	0		"-150< ~ <=-120"	0	0	0	0
	"-120<= ~ <-90"	0	0	0	0		"-120<= ~ <-90"	0	0	0	0		"-120<= ~ <-90"	0	0	0	0
	"-90<= ~ <-60"	0	0	0	0		"-90<= ~ <-60"	0	0	0	0		"-90<= ~ <-60"	0	0	0	0
	"-60<= ~ <-30"	0	0	0	1		"-60<= ~ <-30"	0	0	0	0		"-60<= ~ <-30"	0	0	0	0
	"-30<= ~ <0"	6	8	7	4		"-30<= ~ <0"	5	5	6	1		"-30<= ~ <0"	4	9	8	6
	"0<= ~ <30"	4	4	5	6		"0<= ~ <30"	3	5	4	6		"0<= ~ <30"	4	4	5	4
	"30< ~ <=60"	0	0	0	1		"30< ~ <=60"	0	0	0	2		"30< ~ <=60"	0	0	0	2
	"60< ~ <=90"	0	0	0	0		"60< ~ <=90"	0	0	0	0		"60< ~ <=90"	0	0	0	0
	"90< ~ <=120"	0	0	0	0		"90< ~ <=120"	0	0	0	0		"90< ~ <=120"	0	0	0	0
	"120< ~ <=150"	0	0	0	0		"120< ~ <=150"	0	0	0	0		"120< ~ <=150"	0	0	0	0
	"150< ~ <=180"	0	0	0	0		"150< ~ <=180"	0	0	0	0		"150< ~ <=180"	0	0	0	0
	total count	10	12	12	12		total count	8	10	10	9		total count	8	13	13	12
		% of total basal OHC>30' deviation						% of total basal OHC>30' deviation						% of total basal OHC>30' deviation
		sample 1:	0.0555556					sample 2:	0.0689655					sample 3:	0.0526316
	Ick KO sample 1						Ick KO sample 2						Ick KO sample 3
	Range	IHC	OHC1	OHC2	OHC3		Range	IHC	OHC1	OHC2	OHC3		Range	IHC	OHC1	OHC2	OHC3
	"-180< ~ <= -150"	0	0	0	0		"-180< ~ <= -150"	0	0	0	0		"-180< ~ <= -150"	0	0	0	0
	"-150< ~ <=-120"	0	0	0	0		"-150< ~ <=-120"	0	0	0	0		"-150< ~ <=-120"	0	0	0	0
	"-120<= ~ <-90"	0	0	0	0		"-120<= ~ <-90"	0	0	0	0		"-120<= ~ <-90"	0	0	0	0
	"-90<= ~ <-60"	0	0	0	0		"-90<= ~ <-60"	0	0	0	0		"-90<= ~ <-60"	0	0	0	0
	"-60<= ~ <-30"	0	1	1	0		"-60<= ~ <-30"	0	0	0	0		"-60<= ~ <-30"	1	0	0	0
	"-30<= ~ <0"	7	4	4	3		"-30<= ~ <0"	2	6	1	3		"-30<= ~ <0"	3	7	4	1
	"0<= ~ <30"	6	9	9	7		"0<= ~ <30"	10	9	10	9		"0<= ~ <30"	7	4	6	7
	"30< ~ <=60"	0	1	1	3		"30< ~ <=60"	1	0	3	1		"30< ~ <=60"	0	2	1	2
	"60< ~ <=90"	0	0	0	0		"60< ~ <=90"	0	0	0	0		"60< ~ <=90"	0	0	0	0
	"90< ~ <=120"	0	0	0	0		"90< ~ <=120"	0	0	0	0		"90< ~ <=120"	0	0	0	0
	"120< ~ <=150"	0	0	0	0		"120< ~ <=150"	0	0	0	0		"120< ~ <=150"	0	0	0	0
	"150< ~ <=180"	0	0	0	0		"150< ~ <=180"	0	0	0	0		"150< ~ <=180"	0	0	0	0
	total count	13	15	15	13		total count	13	15	14	13		total count	11	13	11	10
		% of total mid OHC>30' deviation						% of total mid OHC>30' deviation						% of total mid OHC>30' deviation
		sample 1:	0.162791					sample 2:	0.0952381					sample 3:	0.147059
	Ick KO sample 1						Ick KO sample 2						Ick KO sample 3
	Range	IHC	OHC1	OHC2	OHC3		Range	IHC	OHC1	OHC2	OHC3		Range	IHC	OHC1	OHC2	OHC3
	"-180< ~ <= -150"	0	0	0	0		"-180< ~ <= -150"	0	0	0	0		"-180< ~ <= -150"	0	0	0	0
	"-150< ~ <=-120"	0	0	0	0		"-150< ~ <=-120"	0	0	0	0		"-150< ~ <=-120"	0	0	0	0
	"-120<= ~ <-90"	0	0	0	0		"-120<= ~ <-90"	0	0	0	0		"-120<= ~ <-90"	0	0	0	0
	"-90<= ~ <-60"	0	0	0	0		"-90<= ~ <-60"	1	0	0	0		"-90<= ~ <-60"	0	0	0	0
	"-60<= ~ <-30"	0	0	0	1		"-60<= ~ <-30"	1	1	1	0		"-60<= ~ <-30"	0	0	0	0
	"-30<= ~ <0"	2	3	2	1		"-30<= ~ <0"	5	1	4	2		"-30<= ~ <0"	6	6	5	4
	"0<= ~ <30"	3	8	10	9		"0<= ~ <30"	4	8	8	9		"0<= ~ <30"	8	10	7	2
	"30< ~ <=60"	2	1	0	2		"30< ~ <=60"	0	1	0	1		"30< ~ <=60"	0	0	1	2
	"60< ~ <=90"	0	0	0	0		"60< ~ <=90"	0	0	0	0		"60< ~ <=90"	0	0	0	0
	"90< ~ <=120"	0	0	0	0		"90< ~ <=120"	0	0	0	0		"90< ~ <=120"	0	0	0	0
	"120< ~ <=150"	0	0	0	0		"120< ~ <=150"	0	0	0	0		"120< ~ <=150"	0	0	0	0
	"150< ~ <=180"	0	0	0	0		"150< ~ <=180"	0	0	0	0		"150< ~ <=180"	0	0	0	0
	total count	7	12	12	13		total count	11	11	13	12		total count	14	16	13	8
		% of total apical OHC>30' deviation						% of total apical OHC>30' deviation						% of total apical OHC>30' deviation
		sample 1:	0.108108					sample 2:	0.111111					sample 3:	0.0810811
