# Supplementary material for: Dysregulation of sonic hedgehog signaling causes hearing loss in ciliopathy mouse models
Source: eLife. 2020 Dec 31;9:e56551. doi: 10.7554/eLife.56551 (PMC7806262; doi:10.7554/eLife.56551)
Supplement: Figure 5—source data 1. [file elife-56551-fig5-data1.xlsx]

## Sheet: Wild type
	Wild type
	Deviation	IHC	OHC1	OHC2	OHC3
	1	-1.081	18.307	-7.958	-2.99	Base
	2	7.458	7.101	-0.261	24.603
	3	-5.113	6.436	16.027	1.871
	4	-3.137	4.087	16.884	-13.908			Wild type Base						Count
	5	-5.918	-11.207	-7.875	-3.058			Range	IHC	OHC1	OHC2	OHC3		Range	IHC	OHC1	OHC2	OHC3
	6	-1.898	-1.197	-2.411	3.314
	7	-0.564	2.694	0.843	-6.023			"-180< ~ <= -150"	0	0	0	0		"-180< ~ <= -150"	0	0	0	0
	8	-10.441	20.846	-1.103	-6.278			"-150< ~ <=-120"	0	0	0	0		"-150< ~ <=-120"	0	0	0	0
	9	19.566	22.031	12.534	60.723			"-120<= ~ <-90"	0	0	0	0		"-120<= ~ <-90"	0	0	0	0
	10	-10.305	5.124	-4.086	-41.607			"-90<= ~ <-60"	0	0	0	0		"-90<= ~ <-60"	0	0	0	0
	11	-0.497	19.783	7.397	-11.854			"-60<= ~ <-30"	0	0	1	4		"-60<= ~ <-30"	0	0	0.0126582	0.0487805
	12	8.543	3.614	12.529	4.399			"-30<= ~ <0"	40	47	55	42		"-30<= ~ <0"	0.540541	0.573171	0.696203	0.512195
	13	-1.102	5.711	11.335	5.121			"0<= ~ <30"	34	35	23	34		"0<= ~ <30"	0.459459	0.426829	0.291139	0.414634
	14	-8.488	12.529	11.279	16.928			"30< ~ <=60"	0	0	0	1		"30< ~ <=60"	0	0	0	0.0121951
	15	9.896	-0.255	-0.126	6.221			"60< ~ <=90"	0	0	0	1		"60< ~ <=90"	0	0	0	0.0121951
	16	0.674	-0.2645	0.666	13.427			"90< ~ <=120"	0	0	0	0		"90< ~ <=120"	0	0	0	0
	17	-6.34	15.329	18.435	23.199			"120< ~ <=150"	0	0	0	0		"120< ~ <=150"	0	0	0	0
	18	0.744	-0.597	18.435	10.725			"150< ~ <=180"	0	0	0	0		"150< ~ <=180"	0	0	0	0
	19	0.725	-1.771	-0.48	-1.181
	20	-11.906	-0.458	4.764	5.194			total	74	82	79	82		total	1	1	1	1
	21	0.63	0.63	5.838	-5.711
	22	-20.821	-0.268	-21.62	20.556
	23	-17.354	14.036	-1.897	-12.041
	24	-1.548	-0.754	-12.56	23.378
	25	-0.266	-6.69	-8.437	-6.18
	26	5.642	-5.639	-1.776	-0.168
	27	-0.184	4.316	-0.126	15.255
	28	-10.305	-11.31	-0.549	38.66
	29	0.387	-4.764	9.993	0.498
	30	-4.794	-13.407	-12.995	-0.495
	31		-12.529	-8.13	1.494
	32		0.678		-8.379
	33	26.565	-0.268	-10.305	-7.125
	34	-4.764	-0.158	-11.31	-8.13
	35	17.838	-6.937	19.125	-9.592
	36	3.576	-5.194	-26.565	-14.983
	37	12.002	10.684	-15.775	-0.165
	38	18.852	0.955	-5.829	21.59
	39	-0.1998	-10.88	-6.903	6.948
	40	1.312	-10.435	-2.511	17.278
	41	23.384	-3.362	-32.304	-0.465
	42	-5.176	-13.891	-4.764	-5.237
	43		-11.764	-24.996	1.863
	44	2.531	-0.298	6.911	0.543
	45	1.048	17.135	14.273	-39.067
	46	10.749	-2.663	0.559	-23.129
	47	2.552	-2.468	-3.145	-34.689
	48	11.813	-1.975	-3.338	-24.9
	49	4.399	-1.364	-10.439	-14.239
	50	15.238	-1.469	-2.553	-34.785
	51	27.614	-7.125	-9.636	-7.125
	52	11.31	-1.081	-1.697	-27.02
	53	19.983	-1.931	-9.936	-20.556
	54	21.801	-7.726	-13.023	-12.205
	55	12.444	-8.796	-18.901	-23.535
	56		-14.518	-20.556	-16.346
	57		-9.462	-7.125
	58	-9.978	1.229	-7.125	0.367
	59	-16.028	-2.843	-5.711	-7.261
	60	-10.513	-5.62	-0.091	-12.923
	61	-2.056	1.032	-18.646	-1.652
	62	-7.524	2.068	-18.651	-5.084
	63	-15.11	0.641	-28.117	3.917
	64	-6.936	2.249	-10.339	-18.798
	65	-0.494	-12.203	12.691	-8.365
	66	13.066	-17.557	-7.382	-3.412
	67	0.494	17.32	-7.822	4.683
	68		9.486	-12.962	-8.13
	69		6.001		-0.49
	70				-1.169
	71	5.932	-1.081	-3.814	-7.452
	72	-2.291	12.955	-0.955	12.933
	73	-5.805	-4.399	2.896	1.128
	74	-0.168	16.546	-1.863	8.07
	75	3.909	-0.268	-2.106	16.274
	76	-9.927	0.521	-6.017	3.814
	77	-2.84	11.522	-11.054	1.562
	78	-11.492	1.123	3.744	4.764
	79	-3.442	4.438	1.591	8.746
	80	-13.306	5.576	-7.212	16.959
	81	10.883	-12.301	0.074	6.444
	82	-2.916	-8.873	-0.935	-2.389
	83		-0.688		-2.069
	84	1.27	-1.674	-0.49	-71.526	Mid
	85	19.478	-12.642	1.835	-19.577
	86	-27.732	10.92	5.376	-43.456
	87	-7.044	11.063	-19.487	-19.589			Wild type Mid						Count
	88	-0.3	-23.307	-10.246	-40.18			Range	IHC	OHC1	OHC2	OHC3		Range	IHC	OHC1	OHC2	OHC3
	89	-0.662	0.488	-6.176	-39.734
	90	4.563	-23.113	17.219	-17.736			"-180< ~ <= -150"	0	0	0	0		"-180< ~ <= -150"	0	0	0	0
	91	-14.017	0.129	12.579	20.956			"-150< ~ <=-120"	0	0	0	0		"-150< ~ <=-120"	0	0	0	0
	92	-6.47	-2.895	-0.422	-50.887			"-120<= ~ <-90"	0	0	0	0		"-120<= ~ <-90"	0	0	0	0
	93	2.556	-17.376	-2.386	-29.019			"-90<= ~ <-60"	0	0	0	1		"-90<= ~ <-60"	0	0	0	0.012987
	94	-28.508		-6.394	-46.339			"-60<= ~ <-30"	2	1	1	28		"-60<= ~ <-30"	0.0285714	0.0133333	0.0135135	0.363636
	95	-11.836						"-30<= ~ <0"	46	36	34	22		"-30<= ~ <0"	0.657143	0.48	0.459459	0.285714
	96	-17.318	0.962	-20.187	-22.058			"0<= ~ <30"	22	38	38	15		"0<= ~ <30"	0.314286	0.506667	0.513514	0.194805
	97	-2.993	-2.788	1.968	24.85			"30< ~ <=60"	0	0	1	11		"30< ~ <=60"	0	0	0.0135135	0.142857
	98	-32.658	22.086	1.221	-21.44			"60< ~ <=90"	0	0	0	0		"60< ~ <=90"	0	0	0	0
	99	-25.895	-11.937	2.77	-8.304			"90< ~ <=120"	0	0	0	0		"90< ~ <=120"	0	0	0	0
	100	-7.196	-21.302	17.858	-48.645			"120< ~ <=150"	0	0	0	0		"120< ~ <=150"	0	0	0	0
	101	-1.677	-17.375	17.266	-32.443			"150< ~ <=180"	0	0	0	0		"150< ~ <=180"	0	0	0	0
	102	-32.232	14.634	3.798	-13.355
	103	8.09	-9.997	19.964	-20.217			total	70	75	74	77		total	1	1	1	1
	104	-3.796	-4.253	-35.914	-4.951
	105	-12.601	-30.256	-18.721	-10.844
	106		7.371		-11.411
	107	11.452	-1.848	2.779	-16.211
	108	-5.332	19.128	6.643	-32.372
	109	2.666	16.636	1.008	-40.301
	110	-13.285	10.061	-3.4	-36.02
	111	15.596	22.346	10.376	-38.679
	112	15.108	14.701	2.166	-13.641
	113	-0.939	11.914	23.986	-36.353
	114	-0.716	15.945	-6.307	-47.083
	115	4.191	4.394	18.619	-34.638
	116	-5.029	22.099	24.944	-37.931
	117	14.164	5.194	-17.026	-56.31
	118		5.711	-5.784	-38.704
	119		12.529		-34.117
	120	-18.547	-17.613	-2.726	-35.272
	121	-28.383	-26.565	11.06	-49.611
	122	-25.252	25.791	-22.346	-36.87
	123	-18.142	17.374	-17.103	-26.93
	124	-13.575	15.133	7.919	-47.337
	125	-22.712	-2.203	-11.143	-28.785
	126	-19.975	-16.843	-19.637	-26.305
	127	-25.222	-2.454	-14.813	-31.379
	128	-26.038	19.422	-2.806	-8.043
	129	-10.748	10.892	16.049	-40.173
	130		-7.222	47.339	-36.902
	131		-8.983	-6.216	-41.507
	132		-8.715	-2.224	-36.181
	133		-13.431	-6.599	-53.949
	134	-0.165	-2.603	-3.18	18.652
	135	-3.814	-2.291	-1.469	12.095
	136	-0.971	-1.488	-12.041	4.086
	137	-4.243	-12.351	-5.393	11.504
	138	-9.819	-3.545	-5.688	0.466
	139	-12.095	-9.462	-13.529	-6.516
	140	0.61	0.477	-11.31	9.709
	141	-2.427	-9.462	8.746	-2.337
	142	-0.165	4.764	0.963	23.236
	143	-14.931	-13.089	-3.378	11.371
	144	-3.167	7.226	5.819	10.574
	145	-2.394	-2.176	5.819	10.631
	146	-0.579	-6.691	-5.81	8.734
	147	-20.481	-16.572	-0.225	-3.487
	148	11.01	9.926	20.695	33.591
	149	7.675	2.325	3.18	28.74
	150	29.651	2.22	23.164	50.79
	151	-4.097	5.511	13.594	48.18
	152	8.367	13.368	7.44	23.514
	153	8.264	5.65	10.83	37.926
	154	0.915	8.754	3.129	30.53
	155	-0.151	-5.092	-1.051	43.192
	156	1.248	-2.862	14.644	39.758
	157	7.198	4.749	9.776	58.165
	158	7.14	-1.364	4.529	-7.359
	159	8.746	13.59	16.699	32.077
	160	-5.975	1.071	17.963	55.1
	161				30.283
	162	-30.811	28.803	-38.884	-32.005	Apex
	163	-33.721	-40.27	-17.047	-30.75
	164	-51.429	-41.565	3.045	-34.145
	165	-40.43	8.77	-21.735	-46.72
	166	-23.59	-6.828	-8.04	-39.568
	167	-24.699	-3.378	-22.907	-58.239				Wild type Apex
	168	10.751	-15.574	-8.491	-25.871				Count						Count
	169	1.983	-49.757	-50.74	-20.507				Range	IHC	OHC1	OHC2	OHC3		Range	IHC	OHC1	OHC2	OHC3
	170	-24.005	11.425	-23.326	-33.229
	171	-29.599	-6.171	-50.853	-28.302				"-180< ~ <= -150"	0	0	0	0		"-180< ~ <= -150"	0	0	0	0
	172	26.146	10.472	-26.8	-36.847				"-150< ~ <=-120"	0	0	0	0		"-150< ~ <=-120"	0	0	0	0
	173	-36.365	-6.751		-60.077				"-120<= ~ <-90"	0	0	0	0		"-120<= ~ <-90"	0	0	0	0
	174	-2.995	-15.906						"-90<= ~ <-60"	1	1	0	1		"-90<= ~ <-60"	0.0188679	0.0178571	0	0.016129
	175	2.974	6.282	-9.462	-13.355				"-60<= ~ <-30"	10	5	4	16		"-60<= ~ <-30"	0.188679	0.0892857	0.0714286	0.258065
	176	-23.24	-62.073	-28.225	-26.565				"-30<= ~ <0"	24	33	34	24		"-30<= ~ <0"	0.45283	0.589286	0.607143	0.387097
	177	16.07	-26.565	24.747	-0.465				"0<= ~ <30"	18	16	18	18		"0<= ~ <30"	0.339623	0.285714	0.321429	0.290323
	178	1.123	-36.87	8.727	-14.71				"30< ~ <=60"	0	1	0	3		"30< ~ <=60"	0	0.0178571	0	0.0483871
	179	-5.206	-22.107	-7.125	-28.072				"60< ~ <=90"	0	0	0	0		"60< ~ <=90"	0	0	0	0
	180	11.31	-0.565	-5.194	-21.801				"90< ~ <=120"	0	0	0	0		"90< ~ <=120"	0	0	0	0
	181	-1.637	-23.199	-7.417	-18.622				"120< ~ <=150"	0	0	0	0		"120< ~ <=150"	0	0	0	0
	182	6.34	-8.13	17.114	-27.35				"150< ~ <=180"	0	0	0	0		"150< ~ <=180"	0	0	0	0
	183	-28.796	1.863	-30.47	-13.42
	184	-7.442	-15.353	15.05	-41.987				total count	53	56	56	62		total count	1	1	1	1
	185	24.793	47.261	17.148	-25.735
	186	29.578	11.051	2.246	-18.435
	187	24.231	11.17	-5.169	-37.558
	188	14.655	26.134	-10.235	-25.292
	189	-3.642	-21.501	-14.143	-39.936
	190	17.237	-12.773	-13.729	-32.638
	191				-49.399
	192				-34.434
	193	-41.583	-23.824	1.332	24.998
	194	-33.332	-16.991	-20.722	-35.625
	195	-5.194	-23.463	-0.434	15.124
	196	-31.734	-15.141	-5.111	24.775
	197	-60.397	-30.893	10.459	-33.36
	198	-45.7	-2.627	-12.529	32.335
	199	-18.783	-8.219	-5.908	4.512
	200	-32.017	-2.771	2.408	32.681
	201	-23.381	-8.94	14.357	-3.721
	202	-13.85	6.684	25.697	32.082
	203	9.776	-24.775	-9.162	1.909
	204	-21.801	1.754	-1.254	15.296
	205		-13.057	4.014	11.414
	206		-21.038	-4.351	-7.595
	207		-16.398	-2.517	-22.62
	208			-0.465	0.451
	209				-6.563
	210				14.176
	211				19.467
	212				5.932
	213	-17.723	-2.215	-1.005	4.399
	214	-5.459	-26.241	-14.036	-14.47
	215	-19.805	-6.715	-7.572	-7.399
	216	2.826	9.572	-12.858	4.537
	217	7.972	-18.935	3.033	-26.565
	218	-16.148	10.69	1.61	0.675
	219	-10.125	-19.299	-3.19	29.274
	220	2.631	-14.58	-7.253	4.044
	221	26.271	-9.599	16.147	-24.146
	222	-7.333	11.36	16.423	9.416
	223	-18.647	2.876	-3.24	5.457
	224	-20.466	12.283	-1.652	-1.245
	225			0.507
	total count	197	213	209	221
	3 part combined
	Count						Percent of total							IHC	OHC1	OHC2	OHC3
	Range	IHC	OHC1	OHC2	OHC3		Range	IHC	OHC1	OHC2	OHC3
	"-180< ~ <= -150"	0	0	0	0		"-180< ~ <= -150"	0	0	0	0			0	0	0	0
	"-150< ~ <=-120"	0	0	0	0		"-150< ~ <=-120"	0	0	0	0			0	0	0	0
	"-120<= ~ <-90"	0	0	0	0		"-120<= ~ <-90"	0	0	0	0			0	0	0	0
	"-90<= ~ <-60"	1	1	0	2		"-90<= ~ <-60"	0.00507614	0.00469484	0	0.00904977			0.00507614	0.00469484	0	0.00904977
	"-60<= ~ <-30"	12	6	6	48		"-60<= ~ <-30"	0.0609137	0.028169	0.0287081	0.217195			0.0609137	0.028169	0.0287081	0.217195
	"-30<= ~ <0"	110	116	123	88		"-30<= ~ <0"	0.558376	0.544601	0.588517	0.39819			0.558376	0.544601	0.588517	0.39819
	"0<= ~ <30"	74	89	79	67		"0<= ~ <30"	0.375635	0.41784	0.37799	0.303167			0.375635	0.41784	0.37799	0.303167
	"30< ~ <=60"	0	1	1	15		"30< ~ <=60"	0	0.00469484	0.00478469	0.0678733			0	0.00469484	0.00478469	0.0678733
	"60< ~ <=90"	0	0	0	1		"60< ~ <=90"	0	0	0	0.00452489			0	0	0	0.00452489
	"90< ~ <=120"	0	0	0	0		"90< ~ <=120"	0	0	0	0			0	0	0	0
	"120< ~ <=150"	0	0	0	0		"120< ~ <=150"	0	0	0	0			0	0	0	0
	"150< ~ <=180"	0	0	0	0		"150< ~ <=180"	0	0	0	0			0	0	0	0
	total count	197	213	209	221		total count	1	1	1	1
														1	1	1	1

## Sheet: Ift88 cKO
	Ift88 cKO
	Raw data	IHC	OHC1	OHC2	OHC3
	1	-26.565	10.774	75.964	-32.211	Base		Ift88 cKO base						Ift88 cKO base
	2	18.387	51.376	6.193	35.895			Range	IHC	OHC1	OHC2	OHC3		Range	IHC	OHC1	OHC2	OHC3
	3	3.374	-3.814	-33.69	41.987			"-180< ~ <= -150"	0	4	0	0		"-180< ~ <= -150"	0	0.04	0	0
	4	-26.811	-40.236	-21.038	-126.027			"-150< ~ <=-120"	0	13	4	1		"-150< ~ <=-120"	0	0.13	0.0470588	0.00952381
	5	-22.59	-26.565	37.569	-68.199			"-120<= ~ <-90"	0	3	2	1		"-120<= ~ <-90"	0	0.03	0.0235294	0.00952381
	6	8.043	-131.987	52.431	-55.305			"-90<= ~ <-60"	0	5	3	10		"-90<= ~ <-60"	0	0.05	0.0352941	0.0952381
	7	21.801	118.61	-26.565	52.431			"-60<= ~ <-30"	5	8	11	20		"-60<= ~ <-30"	0.0641026	0.08	0.129412	0.190476
	8	-4.654	12.529	-64.983	58.392			"-30<= ~ <0"	33	11	19	15		"-30<= ~ <0"	0.423077	0.11	0.223529	0.142857
	9	-26.565	-123.69	10.62	50.194			"0<= ~ <30"	30	11	22	6		"0<= ~ <30"	0.384615	0.11	0.258824	0.0571429
	10	34.509	-45	-53.13	-26.565			"30< ~ <=60"	10	11	14	27		"30< ~ <=60"	0.128205	0.11	0.164706	0.257143
	11	4.782	137.726	-39.806	63.435			"60< ~ <=90"	0	5	5	14		"60< ~ <=90"	0	0.05	0.0588235	0.133333
	12	5	39.289	-14.036	155.556			"90< ~ <=120"	0	6	1	3		"90< ~ <=120"	0	0.06	0.0117647	0.0285714
	13	-10.528	38.66	81.87	-32.471			"120< ~ <=150"	0	16	2	4		"120< ~ <=150"	0	0.16	0.0235294	0.0380952
	14	-26.565	-39.289	-3.013	24.775			"150< ~ <=180"	0	7	2	4		"150< ~ <=180"	0	0.07	0.0235294	0.0380952
	15	19.983	153.435	-47.49	-42.51			total count	78	100	85	105		total count	1	1	1	1
	16	9.462	27.955	-3.013	70.017
	17	0.194	165.069	87.973	48.814
	18	-7.62	-132.51	-34.695	37.875
	19	7.095	56.31	3.366	90.165				78	100	85	105
	20	-38.66	127.569	41.987	33.69
	21	0.945	180	23.199	-8.13
	22	6.31	-126.027	-4.086	-75.069
	23	-7.291	-8.13	77.905	35.538
	24	-0.165	50.925	-54.462	48.013
	25	16.483	-142.125	47.49	-8.13
	26	-44.799	-156.801	-24.775	-45.126
	27	3.576	33.69	-126.027	-33.69
	28	49.086	154.622	42.51	153.435
	29	-1.34	18.435	20.556	-5.194
	30	6.501	36.027	41.186	74.745
	31	3.881	37.875	14.036	-30.256
	32	-4.462	41.634	120.964	45
	33	35.538	63.435	37.875	69.444
	34	45	114.775	26.565	36.87
	35	-14.931	-35.538	28.61	32.471
	36	5	-131.987	12.095	82.405
	37	-2.879	-145.305	23.962	63.435
	38	-4.509	-61.631	59.744	-45
	39	35.538	-76.517	30.964	-54.462
	40	17.095	10.322	-11.31	78.69
	41	42.879	-22.443	-50.711	80.492
	42	-10.236	-160.821	59.036	35.276
	43	-40.601	-142.125	70.15	-29.619
	44	9.534	137.121	47.175	57.186
	45	1.464	11.535	19.76	44.446
	46	22.815	99.807	-29.903	61.631
	47	38.894	152.301	12.036	-112.443
	48	5.956	133.174	121.866	-36.481
	49	0.602	126.097	-132.391	32.969
	50	-35.833	133.175	-98.13	49.873
	51	-5.924	96.629	-133.877	57.057
	52	-23.694	-19.466	-28.774	18.688
	53	-9.399	-114.039	-92.992	80.852
	54	-9.6	-153.359	-28.142	42.084
	55	24.775	-127.986	-38.991	78.459
	56	-3.13	-68.567	-11.13	142.728
	57	-6.07	22.946	8.15	22.203
	58	25.577	27.69	17.687	59.349
	59	-21.482	-138.25	-26.565	43.56
	60	-4.259	143.13	8.726	-24.075
	61	10.17	143.13	-22.443	-33.619
	62	17.439	62.368	-7.681	64.681
	63	47.364	153.396	167.455	-13.295
	64	-20.892		112.606	-34.249
	65	55.188	145.84	-21.811	-35.538
	66	-37.053	173.308	160.79	71.565
	67	-27.326	-9.759	40.451	-22.921
	68	-27.459	-154.486	10.125	115.093
	69	-18.482	-24.029	-71.319	-38.016
	70	-22.935	-141.34	-11.447	-18.853
	71	11.186	95.194	25.935	154.636
	72	26.329	74.941	-78.65	160.931
	73	-22.14	137.231	25.661	125.131
	74	-3.659	107.072	27.049	-10.334
	75	1.246	77.912	-54.819	125.417
	76	-11.531	149.886	-131.163	101.11
	77	-7.581	-76.421	26.651	38.333
	78	45.26	72.921	32.867	-76.504
	79		149.946	-37.525	54.039
	80		41.969	26.457	41.991
	81		-96.52	-44.119	16.983
	82		-10.822	3.122	144.728
	83		24.007	41.249	-46.038
	84		-22.238	-2.642	78.906
	85		-22.317	-19.938	-65.095
	86		-24.305		-12.555
	87		-48.28		-73.565
	88		123.825		-64.183
	89		-39.668		-10.346
	90		-122.241		-51.693
	91		133.11		-24.611
	92		131.34		-44.31
	93		23.716		-17.685
	94		44.459		-64.942
	95		-60.83		6.288
	96		-45.811		-14.812
	97		-96.356		-42.192
	98		-129.018		-61.751
	99		-30.578		-64.446
	100		8.184		46.855
	101		141.093		42.939
	102				7.953
	103				-34.852
	104				-63.435
	105				-51.901
	106	1.432	37.983	-23.905	8.653	Mid		Ift88 cKO mid						Ift88 cKO mid
	107	33.906	39.303	-94.156	24.305			Range	IHC	OHC1	OHC2	OHC3		Range	IHC	OHC1	OHC2	OHC3
	108	28.963	-148.32	-19.95	-35.926			"-180< ~ <= -150"	0	2	2	1		"-180< ~ <= -150"	0	0.0155039	0.0151515	0.00854701
	109	-31.264	-15.101	-128.66	-38.48			"-150< ~ <=-120"	0	4	2	0		"-150< ~ <=-120"	0	0.0310078	0.0151515	0
	110	-22.152	-45.868	-65.446	14.541			"-120<= ~ <-90"	0	4	5	5		"-120<= ~ <-90"	0	0.0310078	0.0378788	0.042735
	111	-47.498	-56.15	-66.275	9.4			"-90<= ~ <-60"	0	16	20	11		"-90<= ~ <-60"	0	0.124031	0.151515	0.0940171
	112	32.044	54.476	80.838	61.426			"-60<= ~ <-30"	8	26	17	19		"-60<= ~ <-30"	0.114286	0.20155	0.128788	0.162393
	113	37.425	87.665	35.074	4.281			"-30<= ~ <0"	30	16	16	7		"-30<= ~ <0"	0.428571	0.124031	0.121212	0.0598291
	114	-22.631	149.485	-64.342	5.725			"0<= ~ <30"	19	14	22	18		"0<= ~ <30"	0.271429	0.108527	0.166667	0.153846
	115	36.973	126.208	19.026	95.861			"30< ~ <=60"	13	22	30	25		"30< ~ <=60"	0.185714	0.170543	0.227273	0.213675
	116	10.008	-43.937	-31.675	79.16			"60< ~ <=90"	0	11	11	22		"60< ~ <=90"	0	0.0852713	0.0833333	0.188034
	117	5.331	-121.188	-88.48	-71.308			"90< ~ <=120"	0	4	1	4		"90< ~ <=120"	0	0.0310078	0.00757576	0.034188
	118	26.565	-49.399	6.16	48.928			"120< ~ <=150"	0	8	4	4		"120< ~ <=150"	0	0.0620155	0.030303	0.034188
	119	-19.29	18.007	-43.648	71.274			"150< ~ <=180"	0	2	2	1		"150< ~ <=180"	0	0.0155039	0.0151515	0.00854701
	120	-8.13	17.261	-97.322	-77.212			total count	70	129	132	117		total count	1	1	1	1
	121	-34.935	93.19	36.825	69.193
	122	-1.565	-26.008	160.789	-72.224
	123	16.064	-34.339	127.131	19.607
	124	-5.981	81.223	49.517	6.186				70	129	132	117
	125	6.782	-39.124	-84.477	-35.451
	126	-33.184	-37.58	11.558	90.153
	127	43.912	143.13	43.264	-41.746
	128	13.227	-21.557	-80.049	55.289
	129	25.063	31.789	-77.861	-20.397
	130	-31.101	153.172	28.002	-9.067
	131	34.396	-161.889	-48.013	-15.871
	132	-6.352	48.217	56.634	-105.174
	133	-19.028	-7.686	-160.428	68.839
	134	1.343	50.44	10.125	-36.027
	135	37.115	-161.412	39.222	147.588
	136	37.601	-72.33	35.356	-44.515
	137	-4.462	-16.52	-31.166	47.665
	138	48.035	-69.241	75.899	-64.123
	139	32.656	-125.806	136.848	72.398
	140	21.828	136.271	44.346	66.859
	141	-9.623	142.931	-74.109	50.29
	142	42.61	34.902	-88.898	65.257
	143	-5.014	6.953	10.418	-43.578
	144	-13.791	-73.32	16.113	-76.504
	145	-8.576	81.604	-78.528	-37.657
	146	-4.577	-56.575	-33.245	127.496
	147	45.343	-54.058	54.107	53.228
	148	-13.973	-72.222	-164.982	-162.468
	149	-29.76	-41.285	9.819	55.464
	150	-2.249	169.617	36.26	-19.654
	151	-13.581	-112.856	34.821	67.056
	152	-0.983	-144.248	-34.751	50.992
	153	9.527	137.253	75.907	-7.256
	154	-41.286	-71.367	132.862	-117.544
	155	-24.249	76.635	-97.658	127.556
	156	-11.746	-117.897	52.496	48.824
	157	-3.337	-57.524	-86.057	40.775
	158	25.193	18.732	-74.587	-46.736
	159	-9.702	-32.152	74.985	90.22
	160	26.21	5.259	18.911	-60.553
	161	-9.721	-45.955	38.395	9.501
	162	-32.449	122.778	-15.847	72.316
	163	11.571	-110.726	-57.771	87.198
	164	-43.337	16.077	67.109	88.781
	165	-3.54	-12.43	46.692	60.836
	166	32.037	114.944	-85.648	81.67
	167	0.194	-33.165	-40.36	69.706
	168	25.688	-73.988	-29.038	-9.324
	169	-6.229	-80.538	66.938	44.534
	170	11.607	33.111	22.098	73.213
	171	-2.096	-56.634	58.153	-46.432
	172	-2.352	-42.722	-75.739	-56.55
	173	-7.848	34.369	-67.094	53.957
	174	20.832	50.556	29.745	60.495
	175	-7.197	32.998	-77.977	66.801
	176		30.488	41.501	57.902
	177		46.71	-96.957	68.61
	178		68.465	-67.472	45.628
	179		-27.38	-12.767	-37.039
	180		109.909	-9.833	56.104
	181		-58.763	36.941	2.914
	182		128.617	21.766	35.984
	183		-54.039	44.067	-52.35
	184		46.979	31.159	-56.101
	185		7.592	-22.782	133.802
	186		-51.104	78.924	-36.87
	187		93.943	-6.012	2.976
	188		-23.642	-14.313	46.975
	189		-41.738	152.532	-52.549
	190		-35.916	65.726	48.867
	191		60.642	-21.548	115.974
	192		-17.029	-39.472	-63.435
	193		33.341	65.154	68.072
	194		59.049	11.511	52.026
	195		-11.862	-30.53	26.71
	196		51.904	4.328	12.875
	197		-69.205	37.102	-106.113
	198		-69.619	137.337	-87.776
	199		-54.851	47.91	153.154
	200		-11.87	78.761	35.342
	201		14.588	31.34	28.161
	202		3.953	38.996	53.329
	203		35.538	40.365	-45.764
	204		-64.537	-39.859	8.838
	205		4.604	-53.605	37.692
	206		-24.05	38.838	44.63
	207		-28.849	-51.718	-41.192
	208		83.225	2.291	3.538
	209		-70.769	28.301	61.14
	210		29.361	-30.624	-7.595
	211		-38.19	5.138	36.214
	212		-68.749	-18.083	48.378
	213		-20.854	54.462	-70.539
	214		-79.074	-28.826	-94.268
	215		31.862	-68.816	53.006
	216		51.935	39.518	-86.886
	217		61.057	-51.388	-88.059
	218		-33.456	29.218	6.302
	219		-42.61	-29.892	-111.108
	220		-52.091	-95.668	16.519
	221		59.123	24.95	81.001
	222		-71.306	47.333	-37.132
	223		-103.912	43.272
	224		65.81	-25.922
	225		70.965	-63.134
	226		74.637	81.35
	227		-11.667	34.475
	228		20.864	9.772
	229		14.246	24.06
	230		-28.436	-65.283
	231		33.683	6.766
	232		-76.942	-49.353
	233		-79.601	-146.323
	234		3.72	-8.729
	235			104.124
	236			-10.25
	237			-46.912
	238	7.818	21.908	58.736	-28.61	Apex		Ift88 cKO Apex						Ift88 cKO Apex
	239	1.273	32.471	61.572	93.421			Range	IHC	OHC1	OHC2	OHC3		Range	IHC	OHC1	OHC2	OHC3
	240	3.502	133.106	38.071	95.59			"-180< ~ <= -150"	0	0	0	0		"-180< ~ <= -150"	0	0	0	0
	241	2.203	29.096	46.637	4.977			"-150< ~ <=-120"	0	3	0	3		"-150< ~ <=-120"	0	0.0252101	0	0.0211268
	242	-33.847	19.296	62.67	29.391			"-120<= ~ <-90"	0	12	4	22		"-120<= ~ <-90"	0	0.10084	0.0353982	0.15493
	243	8.392	-84.141	-47.794	-133.616			"-90<= ~ <-60"	0	15	10	20		"-90<= ~ <-60"	0	0.12605	0.0884956	0.140845
	244	6.123	39.818	47.231	-124.335			"-60<= ~ <-30"	11	13	17	13		"-60<= ~ <-30"	0.129412	0.109244	0.150442	0.0915493
	245	21.908	-98.604	-42.622	120.925			"-30<= ~ <0"	28	10	13	17		"-30<= ~ <0"	0.329412	0.0840336	0.115044	0.119718
	246	-10.238	124.772	17.819	95.194			"0<= ~ <30"	40	28	26	26		"0<= ~ <30"	0.470588	0.235294	0.230088	0.183099
	247	8.608	-96.746	-85.591	-100.834			"30< ~ <=60"	6	18	18	17		"30< ~ <=60"	0.0705882	0.151261	0.159292	0.119718
	248	48.349	50.297	-46.123	93.324			"60< ~ <=90"	0	7	14	10		"60< ~ <=90"	0	0.0588235	0.123894	0.0704225
	249	-34.9	160.067	-54.265	54.788			"90< ~ <=120"	0	8	8	12		"90< ~ <=120"	0	0.0672269	0.0707965	0.084507
	250	34.196	-149.937	4.457	71.388			"120< ~ <=150"	0	4	3	2		"120< ~ <=150"	0	0.0336134	0.0265487	0.0140845
	251	-29.949	-81.035	68.355	4.098			"150< ~ <=180"	0	1	0	0		"150< ~ <=180"	0	0.00840336	0	0
	252	-3.499	-27.419	78.743	46.063			total count	85	119	113	142		total count	1	1	1	1
	253	23.764	-126.911	19.997	70.133
	254	-5.43	-38.834	-62.437	16.401
	255	-36.298	51.62	110.068	-67.688
	256	34.393	11.298	-108.435	104.047				85	119	113	142
	257	2.063	37.002	25.667	54.553
	258	-44.55	27.224	-28.706	-99.713
	259	-30.069	-10.167	-61.63	98.746
	260	0.251	-81.282	6.286	-75.203
	261	6.536	146.135	97.487	-119.438
	262	28.197	20.031	48.096	-99.611
	263	3.151	-35.175	19.305	-101.197
	264	-36.374	5.257	20.956	-110.809
	265	-20.906	39.289	66.959	-105.604
	266	14.968	9.995	18.678	-100.443
	267	18.547	-52.108	34.98	107.317
	268	-10.14	-99.605	-11.703	107.317
	269	-5.339	-8.427	6.059	22.669
	270	0.11	59.164	6.611	91.077
	271	-32.378	50.398	-92.104	104.744
	272	16.287	42.866	7.905	-100.923
	273	-12.569	-60.945	34.475	45.551
	274	-19.624	-65.232	135.903	-86.987
	275	7.061	-22.917	44.358	-54.291
	276	21.125	-60.161	104.036	-82.965
	277	8.934	8.24	99.999	-15.703
	278	-1.416	21.892	107.735	-54.762
	279	-1.699	-46.909	100.219	-88.995
	280	7.601	-25.878	85.888	-95.16
	281	37.485	-141.369	57.691	-55.954
	282	5.804	114.874	47.84	-91.487
	283	19.684	33.569	76.954	-88.506
	284	-8.499	5.164	51.221	-75.532
	285	-8.409	-81.439	-22.977	-94.968
	286	-45.216	-79.223	13.881	16.544
	287	4.696	68.735	76.345	-89.391
	288	-0.291	74.577	18.61	-105.259
	289	-17.166	-102.991	-17.572	-94.997
	290	45	-115.886	85.002	-82.455
	291	-30.964	45.827	-37.04	-76.088
	292	-25.538	91.853	37.558	-39.207
	293	-13.13	117.418	-3.082	-101.575
	294	19.036	-117.35	68.131	-25.861
	295	-5.711	-59.905	23.199	-13.191
	296	-30.947	98.048	-49.195	-7.91
	297	19.874	-66.06	16.528	80.134
	298	10.155	-110.131	-52.238	10.847
	299	2.863	-59.001	-18.345	69.221
	300	15.892	-48.9	20.659	18.933
	301	10.465	-32.372	87.845	77.238
	302	10.725	93.528	71.565	30.51
	303	3.282	73.33	40.934	20.726
	304	14.281	30.331	50.047	-12.545
	305	-37.057	36.027	-14.415	-21.91
	306	15.695	-50.721	-15.727	12.095
	307	-1.187	29.971	8.62	26.343
	308	-10.94	16.189	124.813	-31.782
	309	-11.787	10.462	117.223	4.086
	310	-13.215	28.819	149.036	32.575
	311	-18.102	16.139	-56.461	-13.38
	312	-15.995	8.437	-72.938	3.228
	313	-11.611	-67.194	-5.241	-139.955
	314	30.569	-86.21	-50.964	27.997
	315	25.954	4.073	44.956	41.593
	316	25.295	19.766	-38.346	76.229
	317	7.383	74.255	-3.18	42.024
	318	-16.452	6.34	59.036	70.006
	319	-10.332	56.132	5.194	30.627
	320	-25.556	-107.814	8.746	100.165
	321	23.901	69.924	-32.471	-93.753
	322	11.911	124.301	-30.964	-3.717
	323		-89.249	-75.964	-97.229
	324		-15.512	-90.565	-102.319
	325		-10.46	-75.881	79.504
	326		-83.535	-36.158	134.932
	327		-93.054	64.745	-111.098
	328		-18.763	-41.111	-75.457
	329		21.801	12.788	-68.486
	330		-54.132	10.112	-85.304
	331		-119.798	-26.139	4.677
	332		30.256	48.979	-28.61
	333		-119.501	50.332	-37.349
	334		4.97	20.98	-7.998
	335		-28.496	65.209	-28.722
	336		-79.38	-85.668	-108.929
	337		-52.125	-35.598	30.953
	338		0.265	5.161	-32.082
	339		37.875	-70.16	-88.942
	340		28.61	-31.115	-42.216
	341		36.87	90.236	28.155
	342		-10.905	11.041	-114.469
	343		81.18	-8.584	37.228
	344		5.675	-56.797	20.76
	345		7.075	4.086	-38.66
	346		105.82	4.043	-52.881
	347		77.195	-87.028	-110.537
	348		-96.121	-77.236	-33.184
	349		-65.739	-17.585	25.932
	350		59.22	-97.839	-20.514
	351		16.439		2.564
	352		96.551		53.13
	353		-35.676		-78.397
	354		-52.939		34.16
	355		3.025		-75.172
	356		107.78		-88.231
	357				60.404
	358				-11.372
	359				-23.321
	360				32.106
	361				-40.914
	362				-69.969
	363				67.38
	364				32.696
	365				17.021
	366				9.462
	367				15.945
	368				19.983
	369				-4.764
	370				-41.186
	371				29.055
	372				114.444
	373				48.814
	374				21.801
	375				18.435
	376				-66.801
	377				-74.745
	378				59.744
	379				-26.565
	total count	233	348	330	364
	Count						Percent of total							IHC	OHC1	OHC2	OHC3
	Range	IHC	OHC1	OHC2	OHC3		Range	IHC	OHC1	OHC2	Last OHC
	"-180< ~ <= -150"	0	6	2	1		"-180< ~ <= -150"	0	0.0172414	0.00606061	0.00274725			0	0.0172414	0.00606061	0.00274725
	"-150< ~ <=-120"	0	20	6	4		"-150< ~ <=-120"	0	0.0574713	0.0181818	0.010989			0	0.0574713	0.0181818	0.010989
	"-120<= ~ <-90"	0	19	11	28		"-120<= ~ <-90"	0	0.0545977	0.0333333	0.0769231			0	0.0545977	0.0333333	0.0769231
	"-90<= ~ <-60"	0	36	33	41		"-90<= ~ <-60"	0	0.103448	0.1	0.112637			0	0.103448	0.1	0.112637
	"-60<= ~ <-30"	24	47	45	52		"-60<= ~ <-30"	0.103004	0.135057	0.136364	0.142857			0.103004	0.135057	0.136364	0.142857
	"-30<= ~ <0"	91	37	48	39		"-30<= ~ <0"	0.390558	0.106322	0.145455	0.107143			0.390558	0.106322	0.145455	0.107143
	"0<= ~ <30"	89	53	70	50		"0<= ~ <30"	0.381974	0.152299	0.212121	0.137363			0.381974	0.152299	0.212121	0.137363
	"30< ~ <=60"	29	51	62	69		"30< ~ <=60"	0.124464	0.146552	0.187879	0.18956			0.124464	0.146552	0.187879	0.18956
	"60< ~ <=90"	0	23	30	46		"60< ~ <=90"	0	0.066092	0.0909091	0.126374			0	0.066092	0.0909091	0.126374
	"90< ~ <=120"	0	18	10	19		"90< ~ <=120"	0	0.0517241	0.030303	0.0521978			0	0.0517241	0.030303	0.0521978
	"120< ~ <=150"	0	28	9	10		"120< ~ <=150"	0	0.0804598	0.0272727	0.0274725			0	0.0804598	0.0272727	0.0274725
	"150< ~ <=180"	0	10	4	5		"150< ~ <=180"	0	0.0287356	0.0121212	0.0137363			0	0.0287356	0.0121212	0.0137363
	total count	233	348	330	364		total count	1	1	1	1
														1	1	1	1

## Sheet: Tbc1d32_bromi
	Tbc1d32bromi
		IHC	OHC1	OHC2	Last OHC
	1	-5.423	-10.666	6.232	21.096	Base
	2	-13.973	5.363	9.799	24.099
	3	-8.015	-4.64	13.402	20.914			Tbc1d32bromi base						Count
	4	3.228	-23.759	2.95	15.725			Range	IHC	OHC1	OHC2	OHC3		Range	IHC	OHC1	OHC2	OHC3
	5	-52.439	9.91	4.801	22.119
	6	-4.377	13.175	12.01	13.087			"-180< ~ <= -150"	0	0	0	0		"-180< ~ <= -150"	0	0	0	0
	7	41.237	41.257	9.246	14.63			"-150< ~ <=-120"	0	0	0	0		"-150< ~ <=-120"	0	0	0	0
	8	24.896	36.337	24.796	20.54			"-120<= ~ <-90"	0	0	0	0		"-120<= ~ <-90"	0	0	0	0
	9	37.315	10.242	3.12	48.814			"-90<= ~ <-60"	0	0	0	0		"-90<= ~ <-60"	0	0	0	0
	10		7.467	-1.921	59.708			"-60<= ~ <-30"	1	0	0	0		"-60<= ~ <-30"	0.0243902	0	0	0
	11				51.457			"-30<= ~ <0"	18	6	7	6		"-30<= ~ <0"	0.439024	0.181818	0.212121	0.153846
	12				38.247			"0<= ~ <30"	19	21	17	23		"0<= ~ <30"	0.463415	0.636364	0.515152	0.589744
	13				24.816			"30< ~ <=60"	3	6	8	10		"30< ~ <=60"	0.0731707	0.181818	0.242424	0.25641
	14				32.382			"60< ~ <=90"	0	0	1	0		"60< ~ <=90"	0	0	0.030303	0
	15				36.133			"90< ~ <=120"	0	0	0	0		"90< ~ <=120"	0	0	0	0
	16				37.001			"120< ~ <=150"	0	0	0	0		"120< ~ <=150"	0	0	0	0
	17				6.124			"150< ~ <=180"	0	0	0	0		"150< ~ <=180"	0	0	0	0
	18	26.73	42.12	56.952	3.814
	19	35.651	27.393	58.288	5.711			total	41	33	33	39		total	1	1	1	1
	20	23.58	52.835	52.803	-21.545
	21	16.545	51.267	56.628	-0.725
	22	-5.81	22.38	55.778	-18.975
	23	24.644	10.559	49.496	-17.004
	24	9.607	10.62	53.195	-18.118
	25	12.642	13.383	61.846	-1.273
	26	16.621	13.383	47.952
	27		36.919
	28	-2.551	8.224	-3.589	9.733
	29	-1.172	-10.883	-7.584	2.203
	30	1.753	-13.56	1.931	22.601
	31	-12.567	8.476	8.234	5.194
	32	0.255	2.011	12.084	19.983
	33	-3.937	2.746	1.848	19.983
	34	-8.084	12.4	0.63	18.86
	35	-4.48	11.924	0.64	0.546
	36	-2.045	8.13	-1.577	29.691
	37	-5.99	11.817	11.972	22.678
	38	3.953	1.548	-2.759	21.198
	39	-3.708	-20.472	-2.141	41.168
	40	-4.122	2.291	6.596	45.151
	41	10.395		-4.62	43.62
	42	3.013
	43	3.094
	44	-12.335
	45	1.219
	46	3.007
	47	0.65
	48	3.693
	49	-29.011
	50	-13.385
	51	-5.883	4.514	13.088	24.422	Mid
	52	10.713	-5.626	14.66	49.226
	53	14.783	-5.671	17.304	11.769			Tbc1d32bromi mid
	54	-3.93	10.692	16.884	37.786				IHC	OHC1	OHC2	OHC3			IHC	OHC1	OHC2	OHC3
	55	5.953	-6.29	3.531	56.916
	56	-7.052	6.802	-8.835	19.356			"-180< ~ <= -150"	0	0	0	0		"-180< ~ <= -150"	0	0	0	0
	57	9.706	11.775	5.44	8.479			"-150< ~ <=-120"	0	0	0	0		"-150< ~ <=-120"	0	0	0	0
	58	4.121	8.433	12.249	9.1			"-120<= ~ <-90"	0	0	0	0		"-120<= ~ <-90"	0	0	0	0
	59	-1.5	7.229	10.96	18.29			"-90<= ~ <-60"	0	0	0	0		"-90<= ~ <-60"	0	0	0	0
	60	3.779	-3.131	23.41	13.204			"-60<= ~ <-30"	1	4	3	0		"-60<= ~ <-30"	0.03125	0.102564	0.0810811	0
	61		5.857	6.212	10.281			"-30<= ~ <0"	16	12	10	2		"-30<= ~ <0"	0.5	0.307692	0.27027	0.047619
	62				16.197			"0<= ~ <30"	15	22	24	22		"0<= ~ <30"	0.46875	0.564103	0.648649	0.52381
	63				23.24			"30< ~ <=60"	0	1	0	18		"30< ~ <=60"	0	0.025641	0	0.428571
	64				35.446			"60< ~ <=90"	0	0	0	0		"60< ~ <=90"	0	0	0	0
	65	-2.252	36.438	-31.535	-4.189			"90< ~ <=120"	0	0	0	0		"90< ~ <=120"	0	0	0	0
	66	-8.259	-25.951	-14.564	18.311			"120< ~ <=150"	0	0	0	0		"120< ~ <=150"	0	0	0	0
	67	-25.614	-32.31	1.695	8.949			"150< ~ <=180"	0	0	0	0		"150< ~ <=180"	0	0	0	0
	68	-22.359	-24.88	5.29	6.096
	69	-20.227	-43.833	3.635	7.058			total	32	39	37	42		total	1	1	1	1
	70	-23.685	-14.539	-3.474	27.108
	71	-29.304	-6.112	-1.441	5.242
	72	-24.444	3.656	-15.127	17.847
	73	-32.399	-28.185	-30.536	50.777
	74		-23.923	-10.812	10.305
	75		-33.009	12.978	34.146
	76		-9.135	-30.878	2.904
	77		-6.932		-6.856
	78		-30.116		24.444
	79		2.544		25.442
	80	-13.069	7.334	16.645	9.462
	81	-3.18	7.253	15.871	34.412
	82	-6.006	5.572	-1.071	32.276
	83	7.125	7.38	-0.299	51.776
	84	7.214	4.17	5.545	51.009
	85	4.485	8.115	4.715	45.13
	86	4.399	12.023	2.291	46.112
	87	19.026	1.771	-16.717	56.933
	88	11.836	8.122	1.181	41.323
	89	18.866	7.62	8.723	48.215
	90	-8.359	0.623	8.13	47.981
	91	6.002	0.591	11.252	56.351
	92	9.467	5.711	0.165	41.079
	93	10.322	-4.977	5.082	25.01	Apex		Tbc1d32bromi apex
	94	15.014	7.386	29.093	-13.234				IHC	OHC1	OHC2	OHC3		Range	IHC	OHC1	OHC2	OHC3
	95	26.347	1.811	10.53	37.424
	96	24.174	2.217	25.751	11.774			"-180< ~ <= -150"	0	0	0	0		"-180< ~ <= -150"	0	0	0	0
	97	17.407	8.486	-5.248	-29.686			"-150< ~ <=-120"	0	0	0	0		"-150< ~ <=-120"	0	0	0	0
	98	-4.451	-1.128	-4.722	-8.53			"-120<= ~ <-90"	0	0	0	0		"-120<= ~ <-90"	0	0	0	0
	99	2.171	-20.835	-4.04	10.383			"-90<= ~ <-60"	0	0	0	0		"-90<= ~ <-60"	0	0	0	0
	100	10.634	-27.69	-8.265	2.874			"-60<= ~ <-30"	1	1	0	0		"-60<= ~ <-30"	0.03125	0.0333333	0	0
	101	27.621	12.259	-2.187	-29.114			"-30<= ~ <0"	10	11	12	6		"-30<= ~ <0"	0.3125	0.366667	0.375	0.1
	102		-8.384	-4.699	-10.487			"0<= ~ <30"	19	12	17	36		"0<= ~ <30"	0.59375	0.4	0.53125	0.6
	103			-2.663	52.074			"30< ~ <=60"	2	5	3	18		"30< ~ <=60"	0.0625	0.166667	0.09375	0.3
	104				36.798			"60< ~ <=90"	0	1	0	0		"60< ~ <=90"	0	0.0333333	0	0
	105				50.988			"90< ~ <=120"	0	0	0	0		"90< ~ <=120"	0	0	0	0
	106				53.164			"120< ~ <=150"	0	0	0	0		"120< ~ <=150"	0	0	0	0
	107				43.903			"150< ~ <=180"	0	0	0	0		"150< ~ <=180"	0	0	0	0
	108				39.094
	109				24.322			total	32	30	32	60		total	1	1	1	1
	110				22.702
	111				13.258
	112				45.987
	113				2.459
	114				29.192
	115				23.074
	116				50.658
	117				38.442
	118				23.486
	119	19.328	-27.37	10.316	20.752
	120	-3.321	-32.905	-2.361	8.486
	121	-22.214	46.312	-2.361	19.203
	122	11.901	51.881	32.081	2.386
	123	15.225	69.444	10.844	17.85
	124	10.291	46.258	38.669	1.091
	125	49.167	43.8	32.735	13.132
	126	31.399			-1.432
	127	20.261			48.536
	128				27.427
	129	-5.865			11.31
	130	5.023			0.963
	131				18.99
	132				23.344
	133				20.294
	134				32.32
	135				21.033
	136				6.537
	137				13.445
	138				5.711
	139				8.313
	140	1.012	0.403	10.125	8.366
	141	16.39	6.981	28.511	2.426
	142	-44.929	9.904	21.615	16.074
	143	-21.571	-21.435	-0.854	39.19
	144	-5.301	-1.989	7.595	58.154
	145	-24.681	-3.347	12.555	10.091
	146	7.368	3.814	0.623	21.801
	147	-14.801	4.304	1.909	34.406
	148	10.816	-6.889	0.651	26.565
	149	-8.499	3.077	-1.685	56.31
	150	0.65	-8.562	-1.146	56.31
	151	-13.031	46.102	0.654	45
	152		0.603	0.68	24.897
	153			8.13
	Total count	105	102	101	141
	Count						Percent of total							IHC	OHC1	OHC2	OHC3
	Range	IHC	OHC1	OHC2	OHC3		Range	IHC	OHC1	OHC2	OHC3
	"-180< ~ <= -150"	0	0	0	0		"-180< ~ <= -150"	0	0	0	0			0	0	0	0
	"-150< ~ <=-120"	0	0	0	0		"-150< ~ <=-120"	0	0	0	0			0	0	0	0
	"-120<= ~ <-90"	0	0	0	0		"-120<= ~ <-90"	0	0	0	0			0	0	0	0
	"-90<= ~ <-60"	0	0	0	0		"-90<= ~ <-60"	0	0	0	0			0	0	0	0
	"-60<= ~ <-30"	3	5	3	0		"-60<= ~ <-30"	0.0285714	0.0490196	0.029703	0			0.0285714	0.0490196	0.029703	0
	"-30<= ~ <0"	44	29	28	14		"-30<= ~ <0"	0.419048	0.284314	0.277228	0.0992908			0.419048	0.284314	0.277228	0.0992908
	"0<= ~ <30"	53	55	58	81		"0<= ~ <30"	0.504762	0.539216	0.574257	0.574468			0.504762	0.539216	0.574257	0.574468
	"30< ~ <=60"	5	12	11	46		"30< ~ <=60"	0.047619	0.117647	0.108911	0.326241			0.047619	0.117647	0.108911	0.326241
	"60< ~ <=90"	0	1	1	0		"60< ~ <=90"	0	0.00980392	0.00990099	0			0	0.00980392	0.00990099	0
	"90< ~ <=120"	0	0	0	0		"90< ~ <=120"	0	0	0	0			0	0	0	0
	"120< ~ <=150"	0	0	0	0		"120< ~ <=150"	0	0	0	0			0	0	0	0
	"150< ~ <=180"	0	0	0	0		"150< ~ <=180"	0	0	0	0			0	0	0	0
	total count	105	102	101	141		total count	1	1	1	1
														1	1	1	1
		203	33		0.162562										0.176471	0.148515

## Sheet: Cilk1
	Cilk1 KO
		IHC	OHC1	OHC2	Last OHC
	1	-28.421	-2.496	0.218	33.699	Base
	2	-1.231	-1.764	0.558	15.918
	3	3.016	-1.441	2.449	34.579			Cilk1 KO base						Cilk1 KO base
	4	0.873	2.291	0.293	21.08			Range	IHC	OHC1	OHC2	OHC3		Range	IHC	OHC1	OHC2	OHC3
	5	3.584	-16.757	24.651	30.77
	6	4.031	5.434	-13.884	23.958			"-180< ~ <= -150"	0	0	0	0		"-180< ~ <= -150"	0	0	0	0
	7	-10.894	7.509	-1.12	19.368			"-150< ~ <=-120"	0	0	0	0		"-150< ~ <=-120"	0	0	0	0
	8	7.511	-3.306	9.75	34.75			"-120<= ~ <-90"	0	0	0	0		"-120<= ~ <-90"	0	0	0	0
	9	1.805	-7.002	-0.274	21.767			"-90<= ~ <-60"	0	0	0	0		"-90<= ~ <-60"	0	0	0	0
	10	-6.442	-4.272	1.566	28.924			"-60<= ~ <-30"	0	0	0	1		"-60<= ~ <-30"	0	0	0	0.030303
	11	-4.663	-10.129	-8.599	37.423			"-30<= ~ <0"	15	22	21	11		"-30<= ~ <0"	0.576923	0.628571	0.6	0.333333
	12	2.685	1.396	3.413				"0<= ~ <30"	11	13	14	16		"0<= ~ <30"	0.423077	0.371429	0.4	0.484848
	13	-3.632	-3.35	-20.864	9.939			"30< ~ <=60"	0	0	0	5		"30< ~ <=60"	0	0	0	0.151515
	14	1.903	-7.406	-7.858	9.627			"60< ~ <=90"	0	0	0	0		"60< ~ <=90"	0	0	0	0
	15	-15.889	-7.5	-4.566	9.408			"90< ~ <=120"	0	0	0	0		"90< ~ <=120"	0	0	0	0
	16	-14.044	2.207	6.144	-0.152			"120< ~ <=150"	0	0	0	0		"120< ~ <=150"	0	0	0	0
	17	2.117	-9.227	-3.736	-4.117			"150< ~ <=180"	0	0	0	0		"150< ~ <=180"	0	0	0	0
	18	-16.091	-16.298	-14.269	-0.8
	19	-1.288	-2.033	14.576	-8.276			total	26	35	35	33		total	1	1	1	1
	20	1.904	-0.226	-4.419	1.904
	21	-1.831	16.761	-5.526	8.169
	22	-15.024	7.398	14.1	3.294
	23	-35.766	1.875	-2.37
	24	-9.906	-2.027	-4.936	-16.107
	25	9.396	-2.593	-7.305	-2.305
	26	-15.35	-14.599	1.254	-0.13
	27	-11.856	-1.115	-1.332	-23.164
	28	-20.393	0.395	-3.865	-18.25
	29	-12.547	0.465	-13.703	0.427
	30	-11.023	-5.706	0.622	-35.414
	31	1.721	-0.632	2.586	-29.959
	32	18.483	4.323	-7.32	-18.877
	33		-12.817	-5.539	5.674
	34		8.135	-14.376	18.88
	35		2.892	-2.172	19.826
	36	5.822	25.474	40.853	15.533	Mid
	37	30.323	25.811	33.851	40.323
	38	-0.909	22.974	50.912	19.432			Cilk1 KO mid						Cilk1 KO mid
	39	29.895	35.87	9.278	47.797				IHC	OHC1	OHC2	OHC3			IHC	OHC1	OHC2	OHC3
	40	-31.343	19.864	45.164	20.569
	41	27.113	35.978	-4.342	31.023			"-180< ~ <= -150"	0	0	0	0		"-180< ~ <= -150"	0	0	0	0
	42	14.199	15.585	15.394	44.087			"-150< ~ <=-120"	0	0	0	0		"-150< ~ <=-120"	0	0	0	0
	43	16.557	-7.95	30.728	27.886			"-120<= ~ <-90"	0	0	0	0		"-120<= ~ <-90"	0	0	0	0
	44	-1.032	32.703	-3.222	25.29			"-90<= ~ <-60"	0	0	0	0		"-90<= ~ <-60"	0	0	0	0
	45	15.096	11.15	5.418	46.82			"-60<= ~ <-30"	1	1	1	0		"-60<= ~ <-30"	0.027027	0.0232558	0.025	0
	46	-13.726	0.165	29.779	37.857			"-30<= ~ <0"	12	17	9	7		"-30<= ~ <0"	0.324324	0.395349	0.225	0.194444
	47	-12.14	18.066	7.2	29.975			"0<= ~ <30"	23	22	25	23		"0<= ~ <30"	0.621622	0.511628	0.625	0.638889
	48		-39.05	-32.268				"30< ~ <=60"	1	3	5	6		"30< ~ <=60"	0.027027	0.0697674	0.125	0.166667
	49		-17.337	-11.318				"60< ~ <=90"	0	0	0	0		"60< ~ <=90"	0	0	0	0
	50	-21.457	8.676	0.185	0.03			"90< ~ <=120"	0	0	0	0		"90< ~ <=120"	0	0	0	0
	51	-28.421	0.71	11.367	-0.116			"120< ~ <=150"	0	0	0	0		"120< ~ <=150"	0	0	0	0
	52	-1.465	0.016	-9.936	-17.814			"150< ~ <=180"	0	0	0	0		"150< ~ <=180"	0	0	0	0
	53	13.966	18.084	-2.953	-1.032
	54	6.866	13.943	7.535	10.989			total	37	43	40	36		total	1	1	1	1
	55	4.743	-4.014	4.911	29.441
	56	6.807	-7.744	6.676	-8.603
	57	2.029	9.3	8.637	-7.94
	58	3.053	-5.536	4.352	12.599
	59	9.834	15.152	5.785	17.427
	60	13.538	4.546	7.08	-4.605
	61		2.806	-0.141
	62		2.207
	63	-0.442	-2.187	0.765	4.677
	64	22.556	-1.061	9.261	26.003
	65	1.691	-3.188	2.116	18.435
	66	-1.625	0.134	8.702	21.326
	67	2.921	-2.154	18.945	20.605
	68	15.975	-0.805	8.31	8.144
	69	17.278	1.865	9.073	8.969
	70	0.196	-9.061	1.151	15.625
	71	3.735	-6.76	1.576	18.458
	72	7.742	0.011	11.083	24.007
	73	12.719	-4.41	12.186	22.92
	74	-2.562	-7.544	-16.386	23.768
	75	-10.949	-5.003	-4.209	-6.494
	76	-18.317	-29.249	-12.617
	77		0.761
	78		-9.92
	79	6.005	-48.283	21.005	13.079	Apex
	80	10	3.324	-8.421	33.688			Cilk1 KO Apex						Cilk1 KO Apex
	81	11.547	-16.924	4.754	35.528				IHC	OHC1	OHC2	OHC3			IHC	OHC1	OHC2	OHC3
	82	-2.597	8.803	52.867	-6.221
	83	15.755	11.103	-12.281	11.814			"-180< ~ <= -150"	0	0	0	0		"-180< ~ <= -150"	0	0	0	0
	84	11.394	-14.657	21.509	11.294			"-150< ~ <=-120"	0	0	0	0		"-150< ~ <=-120"	0	0	0	0
	85	34.789	5.81	5.581	36.231			"-120<= ~ <-90"	0	0	0	0		"-120<= ~ <-90"	0	0	0	0
	86		-9.462	-2.708	6.082			"-90<= ~ <-60"	1	0	0	0		"-90<= ~ <-60"	0.03125	0	0	0
	87		-20.951	4.488	0.731			"-60<= ~ <-30"	1	1	1	1		"-60<= ~ <-30"	0.03125	0.025641	0.0263158	0.030303
	88		4.044	16.028	10.449			"-30<= ~ <0"	13	10	11	7		"-30<= ~ <0"	0.40625	0.25641	0.289474	0.212121
	89		32.773	19.647	15.128			"0<= ~ <30"	15	26	25	20		"0<= ~ <30"	0.46875	0.666667	0.657895	0.606061
	90		18.899	5.161	0.872			"30< ~ <=60"	2	2	1	5		"30< ~ <=60"	0.0625	0.0512821	0.0263158	0.151515
	91				50.42			"60< ~ <=90"	0	0	0	0		"60< ~ <=90"	0	0	0	0
	92	-24.911	12.01	8.225	1.43			"90< ~ <=120"	0	0	0	0		"90< ~ <=120"	0	0	0	0
	93	27.444	11.253	8.308	1.857			"120< ~ <=150"	0	0	0	0		"120< ~ <=150"	0	0	0	0
	94	-5.338	21.412	4.894	12.767			"150< ~ <=180"	0	0	0	0		"150< ~ <=180"	0	0	0	0
	95	-44.405	10.952	1.916	13.172
	96	-6.248	24.871	7.286	12.62			total	32	39	38	33		total	1	1	1	1
	97	22.359	8.928	7.636	14.186
	98	6.976	4.934	-5.919	11.905
	99	-12.12	4.399	6.239	2.399
	100	-7.271	39.487	-5.922	7.46
	101	-76.987	-10.562	29.492	-2.071
	102			-46.736	-10.374
	103			-4.809
	104	-0.8	1.496	4.044	5.592
	105	39.677	10.036	9.33	-3.115
	106	-4.236	7.532	0.109	-36.947
	107	-4.236	-4.447	1.919	-0.199
	108	-7.639	13.68	3.518	-29.482
	109	-1.139	0.969	-8.16	-3.439
	110	9.609	9.23	-19.623	22.353
	111	1.357	-0.877	13.258	9.659
	112	18.642	6.274	2.851	36.853
	113	-7.46	12.694	6.08
	114	20.778	-1.773	-7.097
	115	-13.525	5.786	-13.927
	116	16.074	-6.856	-14.021
	117	10.53	15.912	13.246
	118	11.406	-4.04
	119		1.325
	120		4.942
	Total count	101	117	113	102
	Count						Percent of total
	Range	IHC	OHC1	OHC2	OHC3		Range	IHC	OHC1	OHC2	OHC3			IHC	OHC1	OHC2	OHC3
	"-180< ~ <= -150"	0	0	0	0		"-180< ~ <= -150"	0	0	0	0
	"-150< ~ <=-120"	0	0	0	0		"-150< ~ <=-120"	0	0	0	0			0	0	0	0
	"-120<= ~ <-90"	0	0	0	0		"-120<= ~ <-90"	0	0	0	0			0	0	0	0
	"-90<= ~ <-60"	1	0	0	0		"-90<= ~ <-60"	0.00990099	0	0	0			0	0	0	0
	"-60<= ~ <-30"	3	2	2	2		"-60<= ~ <-30"	0.029703	0.017094	0.0176991	0.0196078			0.00990099	0	0	0
	"-30<= ~ <0"	43	49	41	25		"-30<= ~ <0"	0.425743	0.418803	0.362832	0.245098			0.029703	0.017094	0.0176991	0.0196078
	"0<= ~ <30"	51	61	64	59		"0<= ~ <30"	0.50495	0.521368	0.566372	0.578431			0.425743	0.418803	0.362832	0.245098
	"30< ~ <=60"	3	5	6	16		"30< ~ <=60"	0.029703	0.042735	0.0530973	0.156863			0.50495	0.521368	0.566372	0.578431
	"60< ~ <=90"	0	0	0	0		"60< ~ <=90"	0	0	0	0			0.029703	0.042735	0.0530973	0.156863
	"90< ~ <=120"	0	0	0	0		"90< ~ <=120"	0	0	0	0			0	0	0	0
	"120< ~ <=150"	0	0	0	0		"120< ~ <=150"	0	0	0	0			0	0	0	0
	"150< ~ <=180"	0	0	0	0		"150< ~ <=180"	0	0	0	0			0	0	0	0
	total count	101	117	113	102		total count	1	1	1	1			0	0	0	0
														1	1	1	1
		230	15		0.0652174
															0.0598291	0.0707965
