# Supplementary material for: Dysregulation of sonic hedgehog signaling causes hearing loss in ciliopathy mouse models
Source: eLife. 2020 Dec 31;9:e56551. doi: 10.7554/eLife.56551 (PMC7806262; doi:10.7554/eLife.56551)
Supplement: Figure 6—source data 1. [file elife-56551-fig6-data1.xlsx]

## Sheet: Ift88 Fst Inhba
Ift88 cKO
		1		2		3		4		5		6		7		8		9		10		11		12		13		14		15		16		17		18		19		20		21		22		23		24
Fst-Ctrl		0		0.0736211		0.0416406		0.00252714		0.0492467		0.163441		0.160526														0.180972		0.225897		0.206086		0.143846		0.0782336		0.0835626		0.18528		0.289606		0.207244		0.2948
Fst-cKO		0.07498		0.105327		0.0904859		0.0200108		0.0757222																0.137993		0.0790185		0.091754		0.0550387		0.154717								0.331181		0.265828		0.284117		0.263099
Inhba-Ctrl		1		0.680447		0.422602		0.382983		0.515277		0.447652		0.432649														0.221967		0.0697655		0.202163		0.0201368		0.0356475		0		-0.00170936		-0.0783933		-0.0595251		-0.0590133
Inhba-cKO		1.0892		0.777479		0.56751		0.492641		0.528172																0.132937		0.306501		0.0454906		0.113029		0.0418545								0.0633905		-0.0496287		-0.0389714		-0.084462
Inhba-Ctrl		1.18593		0.806962		0.501177		0.454191		0.611083		0.530884		0.513092		0														0.082737		0.239751		0.0238809		0.0422754		0		-0.00202718		-0.092969		-0.0705927		-0.0699857		0
Inhba-cKO		1.29172		0.922036		0.673028		0.584237		0.626375		0																0.363488		0.0539487		0.134045		0.0496366		0								-0.0588561		-0.0462173		-0.100166
[truncated: 18 more columns]

## Sheet: Ift88 Msx1 A2m
Ift88 cKO
		1		2		3		4		5		6		7		8		9		10		11		12		13		14		15		16		17		18		19		20		21		22		23		24
Msx1-Ctrl		-0.0592202		-0.00841825		-0.054505		-0.075197		-0.0701159		-0.115079		-0.136867														-0.077207		-0.0987779		-0.106135		-0.131978		-0.122709		-0.121921		-0.0452428		-0.100105		-0.128529		-0.00255629
Msx1-cKO		-0.124264		-0.124842		-0.125419		-0.132671		-0.120822																-0.123858		-0.103061		-0.112957		-0.100168		-0.132209								-0.105053		-0.122152		-0.111549		0.157744
A2m-Ctrl		1		0.730579		0.534575		0.439428		0.429221		0.132536		0.245422														0		0.139537		0.105301		-0.116641		-0.134074		-0.0554236		-0.147317		-0.0351731		-0.103946		-0.174115
A2m-cKO		1.07693		0.909274		0.867373		0.825472		0.643754		0.591914																0.156735		-0.0877147		-0.314501		-0.310912								-0.452441		-0.0990246		-0.434		-0.341335
		1		2		3		4		5		6		7		8		9		10		11		12		13		14		15		16		17		18		19		20		21		22		23		24
Fst-Ctrl		-0.00374586		0		0.0736211		0.0416406		0.00252714		0.0492467		0.163441		0.160526														0.180972		0.225897		0.206086		0.143846		0.0782336		0.0835626		0.18528		0.289606		0.207244		0.2948
Fst-cKO		0.0194345		0.07498		0.105327		0.0904859		0.0200108		0.0757222																0.137993		0.0790185		0.091754		0.0550387		0.154717								0.331181		0.265828		0.284117
Inhba-Ctrl		1		0.843221		0.573766		0.356347		0.322939		0.434492		0.377469		0.364818														0.187167		0.0588276		0.170468		0.0169798		0.0300587		0		-0.00144136		-0.0661028		-0.0501928		-0.0497612
Inhba-cKO		0.929222		0.918437		0.655586		0.478536		0.415404		0.445365																0.112095		0.258447		0.0383586		0.0953083		0.0352926								0.0534521		-0.0418479		-0.0328614
		1		2		3		4		5		6		7		8		9		10		11		12		13		14		15		16		17		18		19		20		21		22		23		24
Msx1-Ctrl		-0.110022		-0.0592202		-0.00841825		-0.054505		-0.075197		-0.0701159		-0.115079		-0.136867														-0.077207		-0.0987779		-0.106135		-0.131978		-0.122709		-0.121921		-0.0452428		-0.100105		-0.128529		-0.00255629
Msx1-cKO		-0.130371		-0.124264		-0.124842		-0.125419		-0.132671		-0.120822																-0.123858		-0.103061		-0.112957		-0.100168		-0.132209								-0.105053		-0.122152		-0.111549
A2m-Ctrl		1		0.413218		0.301888		0.220896		0.18158		0.177361		0.0547661		0.101413														0		0.0576593		0.0435124		-0.048198		-0.0554017		-0.022902		-0.0608739		-0.0145342		-0.0429522		-0.0719475
A2m-cKO		0.514287		0.445007		0.375728		0.358414		0.3411		0.266011																0.244589		0.0647656		-0.0362453		-0.129957		-0.128474								-0.186957		-0.0409187		-0.179337
A2m-Ctrl				1		0.730579		0.534575		0.439428		0.429221		0.132536		0.59393														0		0.139537		0.105301		-0.116641		-0.134074		-0.0554236		-0.147317		-0.0351731		-0.103946		-0.174115
A2m-cKO				1.07693		0.909274		0.867373		0.825472		0.643754		0														0.591914		0.156735		-0.0877147		-0.314501		-0.310912								-0.452441		-0.0990246		-0.434
[truncated: 18 more columns]

## Sheet: Tbc1d32_Bromi Fst Inhba
Tbc1d32_bromi
		1		2		3		4		5		6		7		8		9		10		11		12		13		14		15		16		17		18		19		20		21		22		23		24
Fst-Ctrl		0.0117932		0.0496703		0.0875474		0		0.0245129		0.00546676		0.0495709		0.0643877												0.11238		0.0470181		0.0546223		0.0771287		0.123154		0.148763		0.242569		0.277088		0.371528		0.457512
Fst-bromi		-0.0400321		-0.0384184		0.0370048		0.0597341																0.187535		0.0661675		0.193191		0.125884		0.134334												0.148997		0.413212		0.580722
Inhba-Ctrl		1		0.855611		0.656911		0.453759		0.397979		0.341933		0.361828		0.407017												0.246407		0.172064		0.0902448		0.0646756		0.122273		0.0646733		0		-0.00962977		0.0156006		0.0151317
Inhba-bromi		0.640808		0.47898		0.506945		0.468943																0.336238		0.132371		0.219698		0.133284		0.200589												0.0545476		-0.00661797		-0.00419119
Duct number		1		2		3		4		5		6		7		8		9		10		11		12		13		14		15		16		17		18		19		20		21		22		23		24
Fst-Ctrl		0.0117932		0.0496703		0.0875474		0		0.0245129		0.00546676		0.0495709		0.0643877												0.11238		0.0470181		0.0546223		0.0771287		0.123154		0.148763		0.242569		0.277088		0.371528		0.457512
Fst-bromi		-0.0400321		-0.0384184		0.0370048		0.0597341																0.187535		0.0661675		0.193191		0.125884		0.134334												0.148997		0.413212		0.580722
A2m-Ctrl		1		0.592458		0.52539		0.506802		0.562554				0.442663												0.144403		0.189536		0.166953		0		0.265403		0.103978		-0.149572		-0.16125		-0.14096		-0.16263		-0.145661		-0.159144
A2m-bromi		0.631755		0.580678		0.682832		0.544793														0.269778		0.253331		0.161042		0.141756		0.269018		-0.143963		-0.152901		-0.135183		-0.153872		-0.16115		-0.141936		-0.161327		-0.138418		-0.163161
Msx1-Ctrl		-0.156551		-0.156308		-0.137661		-0.116467		-0.149073		-0.145149		-0.119317														-0.151305		-0.155414		-0.148528		-0.15572		-0.157195		-0.152684		-0.13323		0						0
Msx1-bromi		-0.153634		-0.125307		-0.152611		-0.145515																-0.14014		-0.153003		-0.115248		-0.0500762		-0.0550161												-0.0244335		0.227556		0.319177
Inhba-Ctrl		1		0.855611		0.656911		0.453759		0.397979		0.341933		0.361828		0.407017												0.246407		0.172064		0.0902448		0.0646756		0.122273		0.0646733		0		-0.00962977		0.0156006		0.0151317
Inhba-bromi		0.640808		0.47898		0.506945		0.468943																0.336238		0.132371		0.219698		0.133284		0.200589												0.0545476		-0.00661797		-0.00419119
[truncated: 20 more columns]

## Sheet: Tbc1d32_bromi Msx1 A2m
Tbc1d32_bromi
		1		2		3		4		5		6		7		8		9		10		11		12		13		14		15		16		17		18		19		20		21		22		23		24
Msx1-Ctrl		-0.156308		-0.137661		-0.116467		-0.149073		-0.145149		-0.119317														-0.151305		-0.155414		-0.148528		-0.15572		-0.157195		-0.152684		-0.13323		0						0		0.0698357
Msx1-bromi		-0.125307		-0.152611		-0.145515																-0.14014		-0.153003		-0.115248		-0.0500762		-0.0550161												-0.0244335		0.227556		0.319177		0.496058
A2m-Ctrl		1		0.886797		0.855423		0.949525				0.747164												0.243735		0.319914		0.281797		0		0.447969		0.175503		-0.252461		-0.272171		-0.237924		-0.2745		-0.245858		-0.268616		-0.267631
A2m-bromi		0.980116		1.15254		0.919547														0.455354		0.427592		0.27182		0.239268		0.454071		-0.242993		-0.258079		-0.228174		-0.259717		-0.272002		-0.239571		-0.272301		-0.233634		-0.275396
Duct number		1		2		3		4		5		6		7		8		9		10		11		12		13		14		15		16		17		18		19		20		21		22		23		24
Fst-Ctrl		0.0117932		0.0496703		0.0875474		0		0.0245129		0.00546676		0.0495709		0.0643877												0.11238		0.0470181		0.0546223		0.0771287		0.123154		0.148763		0.242569		0.277088		0.371528		0.457512
Fst-bromi		-0.0400321		-0.0384184		0.0370048		0.0597341																0.187535		0.0661675		0.193191		0.125884		0.134334												0.148997		0.413212		0.580722
A2m-Ctrl		1		0.592458		0.52539		0.506802		0.562554				0.442663												0.144403		0.189536		0.166953		0		0.265403		0.103978		-0.149572		-0.16125		-0.14096		-0.16263		-0.145661		-0.159144
A2m-bromi		0.631755		0.580678		0.682832		0.544793														0.269778		0.253331		0.161042		0.141756		0.269018		-0.143963		-0.152901		-0.135183		-0.153872		-0.16115		-0.141936		-0.161327		-0.138418		-0.163161
Msx1-Ctrl		-0.156551		-0.156308		-0.137661		-0.116467		-0.149073		-0.145149		-0.119317														-0.151305		-0.155414		-0.148528		-0.15572		-0.157195		-0.152684		-0.13323		0						0
Msx1-bromi		-0.153634		-0.125307		-0.152611		-0.145515																-0.14014		-0.153003		-0.115248		-0.0500762		-0.0550161												-0.0244335		0.227556		0.319177
Inhba-Ctrl		1		0.855611		0.656911		0.453759		0.397979		0.341933		0.361828		0.407017												0.246407		0.172064		0.0902448		0.0646756		0.122273		0.0646733		0		-0.00962977		0.0156006		0.0151317
Inhba-bromi		0.640808		0.47898		0.506945		0.468943																0.336238		0.132371		0.219698		0.133284		0.200589												0.0545476		-0.00661797		-0.00419119
A2m-Ctrl		1.68788		1		0.886797		0.855423		0.949525				0.747164												0.243735		0.319914		0.281797		0		0.447969		0.175503		-0.252461		-0.272171		-0.237924		-0.2745		-0.245858		-0.268616
A2m-bromi		1.06633		0.980116		1.15254		0.919547														0.455354		0.427592		0.27182		0.239268		0.454071		-0.242993		-0.258079		-0.228174		-0.259717		-0.272002		-0.239571		-0.272301		-0.233634		-0.275396
[truncated: 20 more columns]

## Sheet: Cilk1 KO Fst Inhba
Cilk1 KO
		1		2		3		4		5		6		7		8		9		10		11		12		13		14		15		16		17		18		19		20		21		22		23		24
Fst-Ctrl		-0.10376		0.0354303		0.0618521		0.0623266		0.135858		0.0802967		0.0247351								0		0.178553		0.179843		0.100778		0.147751		0.13251		0.136301		0.121223		0.208287								0.375852		0.56764
Fst-KO		-0.100268		-0.110729		0.000673652		0.11054		0.082779		0.0362136		0.0711796		0.0800915								0.16065		0.247187		0.203001		0.213437		0.204474		0.116674		0.261069		0.213333		0.337498		0.424771
Inhba-Ctrl		1		0.893989		0.620322		0.684896		0.621113		0.39364		0.471454								0.0704773		0.0580118		0.0606149		0.0518404		0.0390297		0		0.0129516		-0.0460937		-0.0447422								-0.0451897		-0.044372
Inhba-KO		0.949678		0.933359		0.658596		0.723964		0.315894		0.595032		0.593824		0.0685103								-0.0156659		0.147846		0.0787044		0.0451261		-0.0276453		-0.0444288		-0.0235886		-0.0348321		-0.0228822		-0.0374737
Duct number		1		2		3		4		5		6		7		8		9		10		11		12		13		14		15		16		17		18		19		20		21		22		23		24
Fst-Ctrl		-0.0890908		-0.10376		0.0354303		0.0618521		0.0623266		0.135858		0.0802967		0.0247351								0		0.178553		0.179843		0.100778		0.147751		0.13251		0.136301		0.121223		0.208287								0.375852
Fst-KO		-0.0668572		-0.100268		-0.110729		0.000673652		0.11054		0.082779		0.0362136		0.0711796		0.0800915								0.16065		0.247187		0.203001		0.213437		0.204474		0.116674		0.261069		0.213333		0.337498		0.424771
A2m-Ctrl		1		0.398166		0.384457		0.383023		0.381588		0.247827		0.255003		0.137497								0.0139318		0		0.0626078		0.123634		0.0927997		-0.0276033		-0.0279273		-0.0282316		-0.0141771								-0.0234796
A2m-KO		0.444532		0.440378		0.448686		0.330642		0.349073		0.367505		0.19741		0.171366		0.0755662								0.0644198		0.0250374		0.0447286		-0.0166552		-0.0180419		-0.0194286		-0.0207335		-0.0235871		-0.0264407		-0.0269524
Msx1-Ctrl		-0.16916		-0.173982		-0.176171		-0.16957		-0.162981		-0.177303		-0.174699		-0.1407								-0.161515		-0.100607		-0.116732		-0.0139713		-0.103232		-0.11836		-0.105761		-0.126467		0								0.191555
Msx1-KO		-0.176072		-0.151687		-0.171679		-0.164038		-0.154856		-0.176522		-0.167041		-0.142847		-0.166623								-0.170114		-0.166077		-0.169207		-0.163536		-0.173651		-0.163504		-0.17489		-0.174205		-0.0144523		0.0533024
Inhba-Ctrl		1		0.966228		0.863797		0.599373		0.661766		0.600137		0.380346		0.455532								0.0680972		0.0560527		0.0585678		0.0500897		0.0377115		0		0.0125142		-0.0445371		-0.0432312								-0.0436636
Inhba-KO		0.933373		0.917605		0.901838		0.636353		0.699515		0.305226		0.574937		0.573769		0.0661966								-0.0151369		0.142853		0.0760464		0.0436021		-0.0267117		-0.0429283		-0.022792		-0.0336557		-0.0221094		-0.0362082
Inhba-Ctrl		1		1		0.893989		0.620322		0.684896		0.621113		0.39364		0.471454								0.0704773		0.0580118		0.0606149		0.0518404		0.0390297		0		0.0129516		-0.0460937		-0.0447422								-0.0451897
Inhba-KO		0.933373		0.949678		0.933359		0.658596		0.723964		0.315894		0.595032		0.593824		0.0685103								-0.0156659		0.147846		0.0787044		0.0451261		-0.0276453		-0.0444288		-0.0235886		-0.0348321		-0.0228822		-0.0374737
[truncated: 18 more columns]

## Sheet: Cilk1 KO Msx1 A2m
Cilk1 KO
		1		2		3		4		5		6		7		8		9		10		11		12		13		14		15		16		17		18		19		20		21		22		23		24
Msx1-Ctrl		-0.173982		-0.176171		-0.16957		-0.162981		-0.177303		-0.174699		-0.1407								-0.161515		-0.100607		-0.116732		-0.0139713		-0.103232		-0.11836		-0.105761		-0.126467		0								0.191555		0.1351
Msx1-KO		-0.151687		-0.171679		-0.164038		-0.154856		-0.176522		-0.167041		-0.142847		-0.166623								-0.170114		-0.166077		-0.169207		-0.163536		-0.173651		-0.163504		-0.17489		-0.174205		-0.0144523		0.0533024
A2m-Ctrl		1		0.965569		0.961966		0.958364		0.622421		0.640443		0.345326								0.03499		0		0.15724		0.310507		0.233068		-0.0693261		-0.0701397		-0.0709039		-0.0356059								-0.0589693		-0.0537188
A2m-KO		1.10602		1.12688		0.830411		0.876702		0.922994		0.495799		0.430389		0.189785								0.161791		0.0628816		0.112336		-0.0418298		-0.0453125		-0.0487951		-0.0520725		-0.0592393		-0.0664061		-0.0676912
Duct number		1		2		3		4		5		6		7		8		9		10		11		12		13		14		15		16		17		18		19		20		21		22		23		24
Fst-Ctrl		-0.0890908		-0.10376		0.0354303		0.0618521		0.0623266		0.135858		0.0802967		0.0247351								0		0.178553		0.179843		0.100778		0.147751		0.13251		0.136301		0.121223		0.208287								0.375852
Fst-KO		-0.0668572		-0.100268		-0.110729		0.000673652		0.11054		0.082779		0.0362136		0.0711796		0.0800915								0.16065		0.247187		0.203001		0.213437		0.204474		0.116674		0.261069		0.213333		0.337498		0.424771
A2m-Ctrl		1		0.398166		0.384457		0.383023		0.381588		0.247827		0.255003		0.137497								0.0139318		0		0.0626078		0.123634		0.0927997		-0.0276033		-0.0279273		-0.0282316		-0.0141771								-0.0234796
A2m-KO		0.444532		0.440378		0.448686		0.330642		0.349073		0.367505		0.19741		0.171366		0.0755662								0.0644198		0.0250374		0.0447286		-0.0166552		-0.0180419		-0.0194286		-0.0207335		-0.0235871		-0.0264407		-0.0269524
Msx1-Ctrl		-0.16916		-0.173982		-0.176171		-0.16957		-0.162981		-0.177303		-0.174699		-0.1407								-0.161515		-0.100607		-0.116732		-0.0139713		-0.103232		-0.11836		-0.105761		-0.126467		0								0.191555
Msx1-KO		-0.176072		-0.151687		-0.171679		-0.164038		-0.154856		-0.176522		-0.167041		-0.142847		-0.166623								-0.170114		-0.166077		-0.169207		-0.163536		-0.173651		-0.163504		-0.17489		-0.174205		-0.0144523		0.0533024
Inhba-Ctrl		1		0.966228		0.863797		0.599373		0.661766		0.600137		0.380346		0.455532								0.0680972		0.0560527		0.0585678		0.0500897		0.0377115		0		0.0125142		-0.0445371		-0.0432312								-0.0436636
Inhba-KO		0.933373		0.917605		0.901838		0.636353		0.699515		0.305226		0.574937		0.573769		0.0661966								-0.0151369		0.142853		0.0760464		0.0436021		-0.0267117		-0.0429283		-0.022792		-0.0336557		-0.0221094		-0.0362082
A2m-Ctrl				1		0.965569		0.961966		0.958364		0.622421		0.640443		0.345326								0.03499		0		0.15724		0.310507		0.233068		-0.0693261		-0.0701397		-0.0709039		-0.0356059								-0.0589693
A2m-KO				1.10602		1.12688		0.830411		0.876702		0.922994		0.495799		0.430389		0.189785								0.161791		0.0628816		0.112336		-0.0418298		-0.0453125		-0.0487951		-0.0520725		-0.0592393		-0.0664061		-0.0676912
[truncated: 18 more columns]
