# Supplementary material for: Dysregulation of sonic hedgehog signaling causes hearing loss in ciliopathy mouse models
Source: eLife. 2020 Dec 31;9:e56551. doi: 10.7554/eLife.56551 (PMC7806262; doi:10.7554/eLife.56551)
Supplement: Figure 7—figure supplement 1—source data 1. [file elife-56551-fig7-figsupp1-data1.xlsx]

## Sheet: E18.5 cilia length t-test
			Control																	Cilk1 cKO																		t-test
	FI507E	lox/+	Base	HC		SC		mid	HC		SC		apex	HC		SC			FI507B	Base	HC		SC		mid	HC		SC		apex	HC		SC					HC	SC		HC	SC
		Base	1	1.483		1.878			2.452		1.689			1.214		1.966			RE	1	1.853		1.882			1.716		2.764			1.938		2.481					1.483	1.878		1.853	1.882
			2	1.257		2.252			1.508		2.175			1.543		2.289				2	1.889		1.817			2.424		4.09			1.134		2.502					1.257	2.252		1.889	1.817
			3	1.241		1.718			1.673		1.919			1.201		1.778				3	1.852		2.042			2.39		2.214			1.935		1.62					1.241	1.718		1.852	2.042
			4	1.333		1.726			1.186		2.215			1.26		1.832				4	1.608		1.224			2.037		1.291			1.064		1.699					1.333	1.726		1.608	1.224
			5	1.506		2.335			1.245		1.833			1.785		2.073				5	1.676		1.336			2.122		3.079			0.982		2.667					1.506	2.335		1.676	1.336
			6	1.145		1.647			1.352		2.353			1.255		1.784				6	1.359		1.357			1.989		2.502			1.489		1.794					1.145	1.647		1.359	1.357
			7	1.408		1.478			1.429		2.177			1.385		1.933				7	1.584		1.967			2.318		4.289			1.421		1.68					1.408	1.478		1.584	1.967
			8	1.35		1.991			1.497		2.021			1.067		1.781				8	1.715		2.431			2.39		2.727			1.545		1.819					1.35	1.991		1.715	2.431
			9	1.329		1.224			1.468		1.959			1.263		1.855				9	2.043		1.381			2.2		3.101			1.638		1.57					1.329	1.224		2.043	1.381
			10	1.655		1.871			1.296		1.99			1.124		2.322				10	1.408		2.174			2.149		2.518			2.115		1.835					1.655	1.871		1.408	2.174
			11	1.507		1.735			1.596		2.096			1.242		1.963				11	1.359		1.383			1.724		3.282			2.701		2.329					1.507	1.735		1.359	1.383
			12	1.515		2.29			1.132		1.473			1.008		1.405				12	1.984		1.512			1.345		2.171			1.904		2.337					1.515	2.29		1.984	1.512
			13	1.285		1.807			1.388		2.116			0.991		2.085				13	1.68		1.449			1.757		2.19			1.116		1.952					1.285	1.807		1.68	1.449
			14	1.723		1.925			1.077		2.001			0.819		2.137				14	2.063		1.221			1.962		4.395			1.037		2.263					1.723	1.925		2.063	1.221
			15	1.538		1.478			1.114		2.097			1.589		1.887				15	1.757		1.578			1.171		1.839			1.309		2.309					1.538	1.478		1.757	1.578
			16	1.552		1.867			1.192		1.835			1.064		2.468				16	1.621		1.779			1.439		2.543			1.122		2.187					1.552	1.867		1.621	1.779
			17	1.573		1.839			1.354		1.844			1.278		2.533				17	1.551		1.192			1.699		3.829			1.04		2.46					1.573	1.839		1.551	1.192
			18	1.531		1.62			1.37		2.035			1.145		2.238				18	1.739		2.086			1.626		3.399			2.143		2.007					1.531	1.62		1.739	2.086
			19	1.655		2.677			0.845		1.941			0.908		1.948				19	1.928		1.669			1.907		2.991			1.023		3.13					1.655	2.677		1.928	1.669
			20	1.658		2.622			1.142		1.902			0.877		1.798				20	1.749		1.565			1.534		1.91			1.39		1.926					1.658	2.622		1.749	1.565
			21	1.511		2.032			1.145		1.967			0.964		2.243				21	1.77		2.139			0.894		2.735			1.237		1.973					1.511	2.032		1.77	2.139
			22	1.575		1.928			1.248		1.387			1.175		1.956				22	1.853		1.045			1.411		2.241			1.239		2.292					1.575	1.928		1.853	1.045
			23	1.445		2.051			1.279		1.731			1.131		2.073				23	2.071		1.664			1.503		2.563			1.408		4.191					1.445	2.051		2.071	1.664
			24	1.417		2.026			1.093		2.451			0.966		2.22				24	2.433		1.886			1.412		2.728			1.293		2.56					1.417	2.026		2.433	1.886
			25	1.713		1.808			1.039		1.987			1.222		1.972				25	1.897		2.246			1.429		2.867			1.311		2.555					1.713	1.808		1.897	2.246
			26	1.517		2.396			1.389		2.453			0.962		2.019				26	1.751		1.321			1.973		2.392			1.207		2.67					1.517	2.396		1.751	1.321
			27	1.293		1.832			1.1		1.934			1.239		2.081				27	1.437		1.545			1.356		1.801			1.369		1.837					1.293	1.832		1.437	1.545
			28	2		1.909			1.146		2.424			1.286		2.217				28	1.924		1.664			1.808		4.853			1.393		2.703					2	1.909		1.924	1.664
			29	1.764		2.238			0.938		2.374			1.012		2.303				29	1.772		1.585			1.706		1.745			1.284		2.019					1.764	2.238		1.772	1.585
			30	1.763		1.986			1.257		1.567			1.04		2.373				30	1.419		1.253			1.081		2.214			1.573		2.049					1.763	1.986		1.419	1.253
			31	1.581		2.527			1.064		2.09			1.138		1.749				31	1.634		3.886			2.069		4.05			2.112		1.72					1.581	2.527		1.634	3.886
			32	1.627		2.28			1.028		1.691			1.182		2.275				32	1.194		2.515			1.692		3.888			1.368		1.91					1.627	2.28		1.194	2.515
			33	1.845		1.881			1.155		2.02			0.838		2.264				33	1.775		2.639			2.275		2.871			1.272		2.352					1.845	1.881		1.775	2.639
			34	1.482		1.631			1.171		2.186			0.994		2.197				34	1.831		2.41			1.599		3.534			1.628		2.077					1.482	1.631		1.831	2.41
			35	1.742		1.986			1.398		1.683			1.068		1.837				35	1.685		3.352			1.605		4.715			1.259		1.889					1.742	1.986		1.685	3.352
			36	1.613		2.247			1.101		1.447			0.923		2.128				36	1.688		3.193			1.906		2.614			1.182		2.568					1.613	2.247		1.688	3.193
			37	1.682		2.242			1.051		2.008			1.086		1.856				37	2.13		2.989			1.787		3.427			0.882		2.184					1.682	2.242		2.13	2.989
			38	1.652		2.322			1.191		2.249			1.096		2.764				38	2.169		3.78			1.873		1.542			1.528		2.081					1.652	2.322		2.169	2.764
			39	1.905		1.834			1.121		1.85			0.937		2.059				39	1.905		4.054			1.685		3.608			1.31		2.517					1.905	1.834		1.905	4.09
			40	1.22		1.55			1.379		1.933			1.142		1.844				40	1.183		3.429			1.432		1.719			1.453		2.211					1.22	1.55		1.183	2.214
			41	1.585		1.718			1.378		1.794			1.084		1.96				41	0.905		2.637			1.499		1.951			1.449		2.268					1.585	1.718		0.905	1.291
			42	1.566		1.8			1.26		1.836			1.103		1.808				42	1.968		3.765			1.595		3.336			1.134		2.424					1.566	1.8		1.968	3.079
			43	1.694		2.331			1.368		2.06			1.136		1.406				43	1.974		2.937			1.524		3.725			0.993		1.535					1.694	2.331		1.974	2.502
			44	1.546		1.798			1.058		1.787			0.972		1.679				44	2.232		3.129			1.502		2.894			1.006		1.732					1.546	1.798		2.232	4.289
			45	1.711		1.603			1.16		1.982			1.102		1.743				45	2.193		2.928			1.616		1.663			1.323		1.996					1.711	1.603		2.193	2.727
			46	1.696		1.82			1.186		1.797			0.836		2.049				46	2.008		3.319			1.254		2			1.431		2.177					1.696	1.82		2.008	3.101
			47	1.298		1.446			2.406		2.212			1.064		1.749				47	1.417		2.66			1.856		2.405			1.098		2.116					1.298	1.446		1.417	2.518
			48	1.726		1.502			2.922		2.07			1.152		2.021				48	1.573		3.111			1.561		1.637			0.972		1.85					1.726	1.502		1.573	3.282
			49	2.461		1.692			2.136		2.16			1.578		1.882				49	1.523		3.703			1.579		1.573			1.872		2.04					2.461	1.692		1.523	2.171
			50	1.846		1.654			2.152		2.51			1.121		1.906				50	1.718					2.02		1.304			1.262		2.754					1.846	1.654		1.718	2.19
			51	1.797		2.272			2.451		2.129			1.12		1.846				51	2.14					1.784		2.458			1.042		1.906					1.797	2.272		2.14	4.395
			52	1.863		2.183			2.841		2.043			1.356		1.749				52	1.643					1.628		1.732			0.93		2.557					1.863	2.183		1.643	1.839
			53	2.272		2.539			2.263		1.71			1.139		1.941				53	1.995					1.757		2.602			0.875		2.324					2.272	2.539		1.995	2.543
			54	2.145		2.589			2.022		1.836			1.236		1.685				54	2.094					1.513		1.643			1.392		1.992					2.145	2.589		2.094	3.829
			55	2.471		1.954			1.514		2.106			1.296		1.746				55	1.76					1.349		1.236			1.438		1.874					2.471	1.954		1.76	3.399
			56	2.291		1.521			1.65		2.545			1.269		1.861				56	2.641					1.335		1.777			1.424		1.768					2.291	1.521		2.641	2.991
			57	1.918		1.531			1.697		1.956			0.824		1.253				57	2.014					1.494		1.476			1.311		2.367					1.918	1.531		2.014	1.91
			58	1.486		1.682			1.406		2.412			1.104		1.477				58	2.773					1.431		1.674			1.323		2.441					1.486	1.682		2.773	2.735
			59	2.086		2.146			1.891		2.079			1.067		1.844				59	2.025					1.663		1.271			1.157		2.441					2.086	2.146		2.025	2.241
			60	1.615		2.317			1.454		1.393			1.34		1.808				60	1.524					2		1.119			1.264		2.189					1.615	2.317		1.524	2.563
			61	1.567		1.755			1.64		1.903			1.413		2.209			FI507B	61	2.479					2.405		1.093			1.834		2.138					1.567	1.755		2.479	2.728
			62	1.773		1.719			1.372		2.13			1.515		1.911			LE	62	2.218					1.637		1.361			1.315		2.197					1.773	1.719		2.218	2.867
			63	1.544		1.519			1.585		2.036			1.404		1.735				63	2.146					1.573		1.341			1.419		2.142					1.544	1.519		2.146	2.392
			64	1.986		1.337			1.493		2.347			1.011		2.018				64	2.014					1.304		0.804			0.799		2.128					1.986	1.337		2.014	1.801
			65	1.739		1.446			1.636		2.136			1.052		1.409				65	2.807					2.458		1.116			1.092		2.413					1.739	1.446		2.807	4.853
			66	1.691		2.21			1.741		1.939			1.398		1.784				66	1.983					1.732		1.218			1.314		1.812					1.691	2.21		1.983	1.745
			67	1.748		1.839			1.511		1.455			1.092		1.896				67	2.292					2.602		1.416			1.007		1.775					1.748	1.839		2.292	2.214
			68	1.752		1.817			1.868		1.898			1.542		1.647				68	2.208					1.643		1.315			0.992		2.009					1.752	1.817		2.208	4.05
			69	1.642		1.543			1.358		1.681			1.038		1.816				69	1.72					1.236		1.364			2.986		2.359					1.642	1.543		1.72	3.888
			70	1.801		2.033			1.42		1.624			1.034		2.069				70	2.152					1.777		1.491			1.533		2.378					1.801	2.033		2.152	2.871
			71	1.797		1.63			1.454		2.139			1.159		2.053				71	2.461					1.476		1.436			2.098		1.938					1.797	1.63		2.461	3.534
			72	1.589		1.62			1.308		2.398			1.391		2.742				72	2.432					1.674		1.728			2.242		2.066					1.589	1.62		2.432	4.715
			73	2.006		1.675			1.42		2.459			1.113		2.058				73	2.364					1.271		1.929			2.161		1.802					2.006	1.675		2.364	2.614
			74	1.66		1.727			1.58		2.038			1.195		2.22				74	1.976					1.119		2.824			1.668		1.918					1.66	1.727		1.976	3.427
			75	1.598		2.248			1.484		2.214			1.431		1.865				75	2.478					1.093		2.543			2.021		1.996					1.598	2.248		2.478	1.542
			76	1.33		1.35			1.464		2.438			1.257		1.891				76	2.009					1.361		1.927			2.41		1.918					1.33	1.35		2.009	3.608
			77	1.035		1.927			1.403		1.678			0.942		1.867				77	2.027					1.341		2.825			3.122		1.884					1.035	1.927		2.027	1.719
			78	1.136		2.01			1.635		2.428			1.335		2.073				78	1.774					0.804		2.167			2.085		2.131					1.136	2.01		1.774	1.951
			79	1.577		2.229			1.447		2.219			1.411		2.133				79	2.642					1.116		3.615			2.074		2.24					1.577	2.229		2.642	3.336
			80	1.315		1.888			1.027		1.984			1.26		2.426				80	2.48					1.218		4.483			1.267		2.242					1.315	1.888		2.48	3.725
			81	1.66		1.756			1.441		1.786			1.196		1.86				81	1.357					1.416		1.965			1.753		2.166					1.66	1.756		1.357	2.894
			82	1.223		1.669			0.822		1.698			1.523		2.234				82	1.752					1.315		2.59			1.598		1.994					1.223	1.669		1.752	1.663
			83			1.735			1.442		2.036			1.62		1.511				83	1.742					1.364		1.648			1.775		1.932						1.735		1.742	2
			84	1.815		1.748			1.322		2.413			1.446		2.05				84	2.156					1.491		1.77			1.546		1.953					1.815	1.748		2.156	2.405
			85	2.093		1.382			2.071		1.939			1.352		2.707				85	2.079					1.436		1.778			1.5		2.111					2.093	1.382		2.079	1.637
			86	1.485		1.559			1.975		2.22			0.827		1.825				86	1.845					3.024		1.872			1.595		2.482					1.485	1.559		1.845	1.573
			87	1.956		1.559			1.871		1.961			0.74		2.206				87	1.848					3.264		2.028			1.72		1.692					1.956	1.559		1.848	1.304
			88	1.691		1.816			2.16		2.252			0.919		1.986				88	1.738					3.161		2.181			1.549		2.076					1.691	1.816		1.738	2.458
			89	1.892		2.186			1.899		1.443			1.098		1.861				89	1.703					2.918		2.131			1.718		2.258					1.892	2.186		1.703	1.732
			90	1.854		2.121			2.802		2.566			0.988		1.778				90	2.663					2.976		2.209			1.51		3.144					1.854	2.121		2.663	2.602
			91	1.804		1.447			1.787		2.039			1.133		2.078			FI627D	91	3.004					2.702		2.048			1.644		3.296					1.804	1.447		1.508	1.643
			92	1.806		1.856			2.065		2.254			1.839		1.75				92	2.24					3.848		2.14			2.193		1.839					1.806	1.856		1.633	1.236
			93	1.65		1.853			1.742		2.133			1.089		2.117				93	2.602					2.825		2.412			2.103		3.035					1.65	1.853		1.001	1.777
			94	2.341		1.694			1.367		3.117			1.155		2.268				94	3.005					2.131		2.525			1.927		2.181					2.341	1.694		1.011	1.476
			95	1.942		1.984			1.34		2.115			1.195		2.332				95	2.684					2.168		2.7			1.805		2.403					1.942	1.984		1.091	1.674
			96	2.142		2.399			1.57		2.621			1.527		2.197				96	2.665					2.385		2.551			1.762		3.406					2.142	2.399		2.154	1.271
			97	1.732		1.651			1.235		2.836			1.552		1.919				97	2.724					2.351		2.09			1.831		2.313					1.732	1.651		0.919	1.119
			98	1.582		1.406			1.368		2.685			1.144		2.164				98	2.763					2.099		1.686			1.967		2.65					1.582	1.406		1.922	1.093
			99	1.56		2.357			1.494		2.427			1.248		2.013				99	2.438					2.131		1.548			2.175		4.535					1.56	2.357		0.638	1.361
			100	1.791		1.98			1.254		2.473			0.914		2.421				100	2.936					2.155		3.48			2.271		3.873					1.791	1.98		1.942	1.341
			101	1.768		1.446			1.316		2.157			1.092		1.768				101	2.769					2.313		2.22			2.236		3.134					1.768	1.446		1.842	0.804
			102	1.373		1.486			1.327		2.758			1.266		1.894				102	2.931					2.228		2.93			1.713		2.902					1.373	1.486		1.117	1.116
			103	2.35		1.679			1.234		2.664			0.861		1.655				103	3.307					2.409		2.321			1.838		3.91					2.35	1.679		0.969	1.218
			104	1.602		1.811			2.832		2.055			1.162		2.07				104	2.986					2.185		2.927			1.838		2.981					1.602	1.811		1.702	1.416
			105	1.933		1.636			1.65		2.468			0.873		2.089				105	3.047					2.048		4.121			2.144		3.392					1.933	1.636		1.81	1.315
			106	2.133		1.651			1.766		2.238			0.69		1.998				106	2.711					2.182		1.464			1.855		3.686					2.133	1.651		2.145	1.364
			107	2.294		1.857			1.75		2.028			0.973		2.124				107	2.875					2.287		1.977			1.667		3.043					2.294	1.857		1.103	1.491
			108	1.203		2.178			1.826		2.554			1.047		1.962				108	2.701					2.244		1.977			1.635		2.439					1.203	2.178		1.75	1.436
			109	1.517		1.513			1.561		1.868			1.195		1.749				109	2.369					2.133		1.38			1.51		3.293					1.517	1.513		1.118	1.728
			110	1.42		1.455			1.625		2.164			0.689		1.966				110	2.886					1.982		1.969			1.607		4.012					1.42	1.455		1.375	1.929
			111	1.529		1.651					1.324			0.817		1.448				111	2.976					1.988		2.203					3.16					1.529	1.651		1.712	2.824
			112	1.815		1.515					2.257			1.169		2.231				112	2.712					2.591		3.937					5.02					1.815	1.515		2.113	2.543
			113	2.093		1.768					2.105			1.035		2.036				113						2.421		5.749					2.583					2.093	1.768		1.715	1.927
			114	1.485		2.308					2.025			1.08		1.636				114						1.951		2.079					4.249					1.485	2.308		1.757	2.825
			115	1.956		2.135					2.215			0.939		2.096				115						2.092		1.989					2.444					1.956	2.135		2.175	2.167
			116	1.691		1.921					2.953			0.867		1.946				116						2.074		1.774					2.695					1.691	1.921		2.156	3.615
			117	1.892		1.995					1.976			0.872		1.942				117						2.173		1.831					2.925					1.892	1.995		1.819	4.483
			118	1.854		1.983					2.509			1.341		2.11				118						2.157		2.165					2.94					1.854	1.983		1.9	1.965
			119	1.804		2.214					2.47			1.081		2.018				119						1.889		2.772					4.685					1.804	2.214		1.531	2.59
			120	1.806		1.873					2.272			0.923		1.88				120						2.353		1.704					7.07					1.806	1.873		1.742	1.648
			121	1.65		2.123					2.074			1.169		1.814				121						1.902		1.698					5.375					1.65	2.123		1.854	1.77
			122	2.341		2.259					2.315			0.875		1.718				122						2.364		4.067					3.289					2.341	2.259		1.938	1.778
			123	1.942		1.724					2.5			0.9		2.302				123						2.088		3.241					1.293					1.942	1.724		1.414	1.872
			124	2.142		2.455					2.27			1.028		1.977				124						1.815		3.264					1.239					2.142	2.455		1.893	2.028
			125	1.732		2.912					2.185			1.011		2.117				125								3.55					2.839					1.732	2.912		1.522	2.181
			126	1.582		1.585					2.598			1.027		2.174				126								3.171					1.994					1.582	1.585		1.492	2.131
			127	1.56		2.474					2.281			1.125		2.068				127								3.886					2.626					1.56	2.474		1.615	2.209
			128	1.791		1.388					2.735			0.956		2.314				128								2.212					3.779					1.791	1.388		1.28	2.048
			129	1.768		1.151					2.112			0.64		2.04				129								3.415					2.437					1.768	1.151		2.363	2.14
			130	1.373		1.78					2.063					1.495				130								2.559					3.22					1.373	1.78		1.585	2.412
			131	2.35		2.492					2.263					2.135				131								1.337					2.916					2.35	2.492		1.687	2.525
			132	1.602		2.213					2.254					1.699				132								2.356					3.04					1.602	2.213		1.716	2.7
			133	1.933		2.037					2.031					1.724				133								1.944					3.44					1.933	2.037		2.424	2.551
			134	2.133		1.96					2.309					1.857				134								1.652					3.777					2.133	1.96		2.39	2.09
			135	2.294		2.112					2.76					2.041				135								1.334					3.105					2.294	2.112		2.037	1.686
			136	1.203		2.116					2.584					1.92				136								2.222					2.696					1.203	2.116		2.122	1.548
			137	1.517		2.136					2.43					1.725				137								2.217					2.731					1.517	2.136		1.989	3.48
			138	1.42		1.859					2.65					1.859				138								2.05					1.901					1.42	1.859		2.318	2.22
			139	1.529		1.945					2.367					1.768				139								1.796					2.469					1.529	1.945		2.39	2.93
			140			1.715					2.472					1.727				140								1.586					3.92					2.452	1.715		2.2	2.321
			141			2.115					2.007					1.778				141								1.739					3.869					1.508	2.115		2.149	2.927
			142			1.899					2.071					1.543				142								1.671					4.031					1.673	1.899		1.724	4.121
			143			1.611					2.779					1.825				143													2.537					1.186	1.611		1.345	1.464
			144			1.513					2.586					2				144													2.892					1.245	1.513		1.757	1.977
			145			1.896					2.121					1.937				145													3.608					1.352	1.896		1.962	1.977
			146			1.721					2.974					1.953				146													2.718					1.429	1.721		1.171	1.38
			147			1.936					2.051					1.79				147													2.528					1.497	1.936		1.439	1.969
			148			2.382					1.703					2.05				148													2.968					1.468	2.382		1.699	2.203
			149			2.437					1.706					1.968				149													4.502					1.296	2.437		1.626	3.937
			150								1.734					1.578				150													3.187					1.596	1.689		1.907	5.749
			151								1.586					1.996				151													2.561					1.132	2.175		1.534	2.079
			152								1.721					1.888				152													2.642					1.388	1.919		0.894	1.989
			153													1.559																	1.825					1.077	2.215		1.411	1.774
			154													1.843																	1.952					1.114	1.833		1.503	1.831
			155													1.738																	2.582					1.192	2.353		1.412	2.165
			156													1.687																	2.775					1.354	2.177		1.429	2.772
			157													1.786																	2.819					1.37	2.021		1.973	1.704
			158													1.658																	2.907					0.845	1.959		1.356	1.698
			159													1.457																	2.354					1.142	1.99		1.808	4.745
			160													2.098																	1.971					1.145	2.096		1.706	6.476
			161													1.633																	2.11					1.248	1.473		1.081	5.219
			162													1.909																						1.279	2.116		2.069	3.19
			163													1.792																						1.093	2.001		1.692	4.488
			164													1.761																						1.039	2.097		2.275	2.805
			165													1.732																						1.389	1.835		1.599	4.564
			166													1.663																						1.1	1.844		1.605	3.875
																																						1.146	2.035		1.906	3.296
																																						0.938	1.941		1.787	3.496
																																						1.257	1.902		1.873	4.264
																																						1.064	1.967		1.685	3.351
																																						1.028	1.387		1.432	3.432
																																						1.155	1.731		1.499	3.682
																																						1.171	2.451		1.595	3.957
																																						1.398	1.987		1.524	7.494
																																						1.101	2.453		1.502	5.761
																																						1.051	1.934		1.616	4.677
																																						1.191	2.424		1.254	5.033
																																						1.121	2.374		1.856	4.076
																																						1.379	1.567		1.561	3.369
																																						1.378	2.09		1.579	4.246
																																						1.26	1.691		2.02	4.031
																																						1.368	2.02		1.784	4.489
																																						1.058	2.186		1.628	5.617
																																						1.16	1.683		1.757	3.9
																																						1.186	1.447		1.513	5.79
																																						2.406	2.008		1.349	6.753
																																						2.922	2.249		1.335	3.805
																																						2.136	1.85		1.494	3.82
																																						2.152	1.933		1.431	6.265
																																						2.451	1.794		1.663	2.481
																																						2.841	1.836		2	2.502
																																						2.263	2.06		2.405	1.62
				HC		SC																																2.022	1.787		1.637	1.699
				control	Cilk1 cKO	control	Cilk1 cKO																															1.514	1.982		1.573	2.667
			Average	1.45213	1.85785	1.98768	2.76268																															1.65	1.797		1.304	1.794
			STDEV/2	0.397725	0.558212	0.323754	1.11743																															1.697	2.212		2.458	1.68
																																						1.406	2.07		1.732	1.819
																																						1.891	2.16		2.602	1.57
																																						1.454	2.51		1.643	1.835
																																						1.64	2.129		1.236	2.329
																																						1.372	2.043		1.777	2.337
																																						1.585	1.71		1.476	1.952
																																						1.493	1.836		1.674	2.263
																																						1.636	2.106		1.271	2.309
																																						1.741	2.545		1.119	2.187
																																						1.511	1.956		1.093	2.46
																																						1.868	2.412		1.361	2.007
																																						1.358	2.079		1.341	3.13
																																						1.42	1.393		0.804	1.926
																																						1.454	1.903		1.116	1.973
																																						1.308	2.13		1.218	2.292
																																						1.42	2.036		1.416	4.191
																																						1.58	2.347		1.315	2.56
																																						1.484	2.136		1.364	2.555
																																						1.464	1.939		1.491	2.67
																																						1.403	1.455		1.436	1.837
																																						1.635	1.898		3.024	2.703
																																						1.447	1.681		3.264	2.019
																																						1.027	1.624		3.161	2.049
																																						1.441	2.139		2.918	1.72
																																						0.822	2.398		2.976	1.91
																																						1.442	2.459		2.702	2.352
																																						1.322	2.038		3.848	2.077
																																						2.071	2.214		2.825	1.889
																																						1.975	2.438		2.131	2.568
																																						1.871	1.678		2.168	2.184
																																						2.16	2.428		2.385	2.081
																																						1.899	2.219		2.351	2.517
																																						2.802	1.984		2.099	2.211
																																						1.787	1.786		2.131	2.268
																																						2.065	1.698		2.155	2.424
																																						1.742	2.036		2.313	1.535
																																						1.367	2.413		2.228	1.732
																																						1.34	1.939		2.409	1.996
																																						1.57	2.22		2.185	2.177
																																						1.235	1.961		2.048	2.116
																																						1.368	2.252		2.182	1.85
																																						1.494	1.443		2.287	2.04
																																						1.254	2.566		2.244	2.754
																																						1.316	2.039		2.133	1.906
																																						1.327	2.254		1.982	2.557
																																						1.234	2.133		1.988	2.324
																																						2.832	3.117		2.591	1.992
																																						1.65	2.115		2.421	1.874
																																						1.766	2.621		1.951	1.768
																																						1.75	2.836		2.092	2.367
																																						1.826	2.685		2.074	2.441
																																						1.561	2.427		2.173	2.441
																																						1.625	2.473		2.157	2.189
																																						1.214	2.157		1.889	2.138
																																						1.543	2.758		2.353	2.197
																																						1.201	2.664		1.902	2.142
																																						1.26	2.055		2.364	2.128
																																						1.785	2.468		2.088	2.413
																																						1.255	2.238		1.815	1.812
																																						1.385	2.028		1.938	1.775
																																						1.067	2.554		1.134	2.009
																																						1.263	1.868		1.935	2.359
																																						1.124	2.164		1.064	2.378
																																						1.242	1.324		0.982	1.938
																																						1.008	2.257		1.489	2.066
																																						0.991	2.105		1.421	1.802
																																						0.819	2.025		1.545	1.918
																																						1.589	2.215		1.638	1.996
																																						1.064	2.953		2.115	1.918
																																						1.278	1.976		2.701	1.884
																																						1.145	2.509		1.904	2.131
																																						0.908	2.47		1.116	2.24
																																						0.877	2.272		1.037	2.242
																																						0.964	2.074		1.309	2.166
																																						1.175	2.315		1.122	1.994
																																						1.131	2.5		1.04	1.932
																																						0.966	2.27		2.143	1.953
																																						1.222	2.185		1.023	2.111
																																						0.962	2.598		1.39	2.482
																																						1.239	2.281		1.237	1.692
																																						1.286	2.735		1.239	2.076
																																						1.012	2.112		1.408	2.258
																																						1.04	2.063		1.293	3.144
																																						1.138	2.263		1.311	3.296
																																						1.182	2.254		1.207	1.839
																																						0.838	2.031		1.369	3.035
																																						0.994	2.309		1.393	2.181
																																						1.068	2.76		1.284	2.403
																																						0.923	2.584		1.573	3.406
																																						1.086	2.43		2.112	2.313
																																						1.096	2.65		1.368	2.65
																																						0.937	2.367		1.272	4.535
																																						1.142	2.472		1.628	3.873
																																						1.084	2.007		1.259	3.134
																																						1.103	2.071		1.182	2.902
																																						1.136	2.779		0.882	3.91
																																						0.972	2.586		1.528	2.981
																																						1.102	2.121		1.31	3.392
																																						0.836	2.974		1.453	3.686
																																						1.064	2.051		1.449	3.043
																																						1.152	1.703		1.134	2.439
																																						1.578	1.706		0.993	3.293
																																						1.121	1.734		1.006	4.012
																																						1.12	1.586		1.323	3.16
																																						1.356	1.721		1.431	5.02
																																						1.139	1.966		1.098	2.583
																																						1.236	2.289		0.972	4.249
																																						1.296	1.778		1.872	2.444
																																						1.269	1.832		1.262	2.695
																																						0.824	2.073		1.042	2.925
																																						1.104	1.784		0.93	2.94
																																						1.067	1.933		0.875	4.685
																																						1.34	1.781		1.392	7.07
																																						1.413	1.855		1.438	5.375
																																						1.515	2.322		1.424	3.289
																																						1.404	1.963		1.311	1.293
																																						1.011	1.405		1.323	1.239
																																						1.052	2.085		1.157	2.839
																																						1.398	2.137		1.264	1.994
																																						1.092	1.887		1.834	2.626
																																						1.542	2.468		1.315	3.779
																																						1.038	2.533		1.419	2.437
																																						1.034	2.238		0.799
																																						1.159	1.948		1.092	4.29
																																						1.391	1.798		1.314	2.886
																																						1.113	2.243		1.007	3.467
																																						1.195	1.956		0.992	3.454
																																						1.431	2.073		2.986	3.707
																																						1.257	2.22		1.533	4.356
																																						0.942	1.972		2.098	3.419
																																						1.335	2.019		2.242	3.644
																																						1.411	2.081		2.161	3.4
																																						1.26	2.217		1.668	4.463
																																						1.196	2.303		2.021	5.101
																																						1.523	2.373		2.41	4.618
																																						1.62	1.749		3.122	4.481
																																						1.446	2.275		2.085	3.551
																																						1.352	2.264		2.074	5.109
																																						0.827	2.197		1.267	4.054
																																						0.74	1.837		1.753	5.768
																																						0.919	2.128		1.598	4.398
																																						1.098	1.856		1.775	4.221
																																						0.988	2.764		1.546	4.212
																																						1.133	2.059		1.5	3.823
																																						1.839	1.844		1.595	4.462
																																						1.089	1.96		1.72	4.332
																																						1.155	1.808		1.549	5.078
																																						1.195	1.406		1.718	4
																																						1.527	1.679		1.51	4.411
																																						1.552	1.743		1.644	4.29
																																						1.144	2.049		2.193	4.082
																																						1.248	1.749		2.103	3.614
																																						0.914	2.021		1.927	3.051
																																						1.092	1.882		1.805	3.739
																																						1.266	1.906		1.762	4.688
																																						0.861	1.846		1.831	2.828
																																						1.162	1.749		1.967	2.944
																																						0.873	1.941		2.175	2.826
																																						0.69	1.685		2.271	5.152
																																						0.973	1.746		2.236	3.979
																																						1.047	1.861		1.713	3.383
																																						1.195	1.253		1.838	3.717
																																						0.689	1.477		1.838	4.076
																																						0.817	1.844		2.144	3.78
																																						1.169	1.808		1.855	4.054
																																						1.035	2.209		1.667	3.429
																																						1.08	1.911		1.635	2.637
																																						0.939	1.735		1.51	3.765
																																						0.867	2.018		1.607	2.937
																																						0.872	1.409		3.004	3.129
																																						1.341	1.784		2.24	2.928
																																						1.081	1.896		2.602	3.319
																																						0.923	1.647		3.005	2.66
																																						1.169	1.816		2.684	3.111
																																						0.875	2.069		2.665	3.703
																																						0.9	2.053		2.724	3.22
																																						1.028	2.742		2.763	2.916
																																						1.011	2.058		2.438	3.04
																																						1.027	2.22		2.936	3.44
																																						1.125	1.865		2.769	3.777
																																						0.956	1.891		2.931	3.105
																																						0.64	1.867		3.307	2.696
																																							2.073		2.986	2.731
																																							2.133		3.047	1.901
																																							2.426		2.711	2.469
																																							1.86		2.875	3.92
																																							2.234		2.701	3.869
																																							1.511		2.369	4.031
																																							2.05		2.886	2.537
																																							2.707		2.976	2.892
																																							1.825		2.712	3.608
																																							2.206		4.067	2.718
																																							1.986		3.241	2.528
																																							1.861		3.264	2.968
																																							1.778		3.55	4.502
																																							2.078		3.171	3.187
																																							1.75		3.886	2.561
																																							2.117		2.212	2.642
																																							2.268		3.415	1.825
																																							2.332		2.559	1.952
																																							2.197		1.337	2.582
																																							1.919		2.356	2.775
																																							2.164		1.944	2.819
																																							2.013		1.652	2.907
																																							2.421		1.334	2.354
																																							1.768		2.222	1.971
																																							1.894		2.217	2.11
																																							1.655		2.05
																																							2.07		1.796
																																							2.089		1.586
																																							1.998		1.739
																																							2.124		1.671
																																							1.962		2.338
																																							1.749		1.938
																																							1.966		1.771
																																							1.448		3.462
																																							2.231		2.962
																																							2.036		1.908
																																							1.636		2.236
																																							2.096		1.593
																																							1.946		1.55
																																							1.942		1.69
																																							2.11		2.256
																																							2.018		1.881
																																							1.88		2.773
																																							1.814		2.122
																																							1.718		1.577
																																							2.302		1.78
																																							1.977		1.758
																																							2.117		1.934
																																							2.174
																																							2.068
																																							2.314
																																							2.04
																																							1.495
																																							2.135
																																							1.699
																																							1.724
																																							1.857
																																							2.041
																																							1.92
																																							1.725
																																							1.859
																																							1.768
																																							1.727
																																							1.778
																																							1.543
																																							1.825
																																							2
																																							1.937
																																							1.953
																																							1.79
																																							2.05
																																							1.968
																																							1.578
																																							1.996
																																							1.888
																																							1.559
																																							1.843
																																							1.738
																																							1.687
																																							1.786
																																							1.658
																																							1.457
																																							2.098
																																							1.633
																																							1.909
																																							1.792
																																							1.761
																																							1.732
																																							1.663
																																					Average	1.45213	1.98768		1.85785	2.76268
																																					STDEV/2	0.397725	0.323754		0.558212	1.11743
																																					T-test	HC	1.18616e-24	1.18289e-32

## Sheet: E18.5 cochlear length
				um			average	STDEV		t-test
			Control	5554.3	5467.28	5658.5	5560.03	95.7377		8.07736e-06	p<0.0001
			Cilk1 cKO	4609.67	4608.07	4746.77	4654.84	79.6177
				0.829928	0.842844	0.838873	0.837196	0.837211
			Control	5560.03	95.7377
			Cilk1 cKO	4654.84	79.6177
