# Supplementary material for: Dysregulation of sonic hedgehog signaling causes hearing loss in ciliopathy mouse models
Source: eLife. 2020 Dec 31;9:e56551. doi: 10.7554/eLife.56551 (PMC7806262; doi:10.7554/eLife.56551)
Supplement: Figure 7—figure supplement 2—source data 1. [file elife-56551-fig7-figsupp2-data1.xlsx]

## Sheet: Cilk1 cKO qPCR
	Sample Name	Target Name	Cт	Cт mean	ΔCt	ΔΔCt	(-)ΔΔCт	2^(-)ΔΔCт			Sample Name	Target Name	Cт	Cт mean	ΔCt	ΔΔCt	(-)ΔΔCт	2^(-)ΔΔCт
	Cilk1 ctrl	GAPDH	17.5556	17.5603	0	-9.49077	9.49077	719.458			Cilk1 ctrl	GAPDH	17.487	17.5074	0	-9.33713	9.33713	646.78
	Cilk1 ctrl	GAPDH	17.472								Cilk1 ctrl	GAPDH	17.4894
	Cilk1 ctrl	GAPDH	17.6533								Cilk1 ctrl	GAPDH	17.5457
	Cilk1 ctrl	Ptch1 2018	26.5538	26.6054	9.04509	-0.445679	0.445679	1.36195			Cilk1 ctrl	Ptch1 2018	26.616	26.5942	9.08682	-0.250308	0.250308	1.18946
	Cilk1 ctrl	Ptch1 2018	26.5895								Cilk1 ctrl	Ptch1 2018	26.5564
	Cilk1 ctrl	Ptch1 2018	26.6729								Cilk1 ctrl	Ptch1 2018	26.6101
	Cilk1 ctrl	Ptch1 new2	26.2037	26.2523	8.69197	-0.798792	0.798792	1.73964			Cilk1 ctrl	Ptch1 new2	26.4118	26.287	8.77965	-0.557479	0.557479	1.4717
	Cilk1 ctrl	Ptch1 new2	26.2731								Cilk1 ctrl	Ptch1 new2	26.2314
	Cilk1 ctrl	Ptch1 new2	26.28								Cilk1 ctrl	Ptch1 new2	26.2179
	Cilk1 ctrl	Gli1	24.1812	24.0958	6.53551	-2.95526	2.95526	7.75572			Cilk1 ctrl	Gli1	23.9836	24.1465	6.63909	-2.69804	2.69804	6.4892
	Cilk1 ctrl	Gli1	24.0513								Cilk1 ctrl	Gli1	24.0417
	Cilk1 ctrl	Gli1	24.0549								Cilk1 ctrl	Gli1	24.4141
	Cilk1 cKO	GAPDH	20.3418	20.3553	0	-9.49077	9.49077	719.458			Cilk1 cKO	GAPDH	20.3864	20.4084	0	-9.33713	9.33713	646.78
	Cilk1 cKO	GAPDH	20.354								Cilk1 cKO	GAPDH	20.4606
	Cilk1 cKO	GAPDH	20.37								Cilk1 cKO	GAPDH	20.3782
	Cilk1 cKO	Ptch1 2018	29.8047	29.8461	9.49077	0	0	1			Cilk1 cKO	Ptch1 2018	29.8425	29.6468	9.23836	-0.0987759	0.0987759	1.07086
	Cilk1 cKO	Ptch1 2018	29.7267								Cilk1 cKO	Ptch1 2018	29.7323
	Cilk1 cKO	Ptch1 2018	30.0068								Cilk1 cKO	Ptch1 2018	29.3655
	Cilk1 cKO	Ptch1 new2	29.404	29.5146	9.15933	-0.331434	0.331434	1.25826			Cilk1 cKO	Ptch1 new2	29.9814	29.7455	9.33713	0	0	1
	Cilk1 cKO	Ptch1 new2	29.6651								Cilk1 cKO	Ptch1 new2	29.5575
	Cilk1 cKO	Ptch1 new2	29.4748								Cilk1 cKO	Ptch1 new2	29.6978
	Cilk1 cKO	Gli1	28.729	28.7044	8.34912	-1.14164	1.14164	2.20632			Cilk1 cKO	Gli1	28.909	28.8676	8.4592	-0.877929	0.877929	1.83774
	Cilk1 cKO	Gli1	28.5962								Cilk1 cKO	Gli1	28.9074
	Cilk1 cKO	Gli1	28.7881								Cilk1 cKO	Gli1	28.7864
					9.49077										9.33713
	Sample Name	Target Name	Cт	Cт mean	ΔCt	ΔΔCt	(-)ΔΔCт	2^(-)ΔΔCт			Sample Name	Target Name	Cт	Cт mean	ΔCt	ΔΔCt	(-)ΔΔCт	2^(-)ΔΔCт
	Cilk1 ctrl	GAPDH	17.7639	17.8477	0	-10.0404	10.0404	1053.07			Cilk1 ctrl	GAPDH	17.7901	17.7988	0	-9.84043	9.84043	916.78
	Cilk1 ctrl	GAPDH	17.8403								Cilk1 ctrl	GAPDH	17.7774
	Cilk1 ctrl	GAPDH	17.939								Cilk1 ctrl	GAPDH	17.8289
	Cilk1 ctrl	Ptch1 2018	26.3538	26.3392	8.49147	-1.54892	1.54892	2.92598			Cilk1 ctrl	Ptch1 2018	26.2629	26.3281	8.52936	-1.31107	1.31107	2.48126
	Cilk1 ctrl	Ptch1 2018	26.3687								Cilk1 ctrl	Ptch1 2018	26.3339
	Cilk1 ctrl	Ptch1 2018	26.2951								Cilk1 ctrl	Ptch1 2018	26.3876
	Cilk1 ctrl	Ptch1 new2	25.9522	25.9626	8.11482	-1.92557	1.92557	3.79886			Cilk1 ctrl	Ptch1 new2	25.9444	25.973	8.17425	-1.66618	1.66618	3.17374
	Cilk1 ctrl	Ptch1 new2	25.9952								Cilk1 ctrl	Ptch1 new2	26.0477
	Cilk1 ctrl	Ptch1 new2	25.9403								Cilk1 ctrl	Ptch1 new2	25.927
	Cilk1 ctrl	Gli1	24.3531	24.264	6.41629	-3.6241	3.6241	12.33			Cilk1 ctrl	Gli1	24.2998	24.3662	6.56744	-3.27299	3.27299	9.6665
	Cilk1 ctrl	Gli1	24.126								Cilk1 ctrl	Gli1	24.5981
	Cilk1 ctrl	Gli1	24.313								Cilk1 ctrl	Gli1	24.2008
	Cilk1 cKO	GAPDH	20.5502	20.5824	0	-10.0404	10.0404	1053.07			Cilk1 cKO	GAPDH	20.5867	20.6716	0	-9.84043	9.84043	916.78
	Cilk1 cKO	GAPDH	20.5758								Cilk1 cKO	GAPDH	20.6598
	Cilk1 cKO	GAPDH	20.6213								Cilk1 cKO	GAPDH	20.7683
	Cilk1 cKO	Ptch1 2018	30.5674	30.6228	10.0404	0	0	1			Cilk1 cKO	Ptch1 2018	30.2127	30.291	9.61942	-0.221008	0.221008	1.16555
	Cilk1 cKO	Ptch1 2018	30.3639								Cilk1 cKO	Ptch1 2018	30.3058
	Cilk1 cKO	Ptch1 2018	30.9371								Cilk1 cKO	Ptch1 2018	30.3545
	Cilk1 cKO	Ptch1 new2	30.7817	30.6136	10.0311	-0.00925509	0.00925509	1.00644			Cilk1 cKO	Ptch1 new2	30.3916	30.512	9.84043	0	0	1
	Cilk1 cKO	Ptch1 new2	30.5522								Cilk1 cKO	Ptch1 new2	30.6065
	Cilk1 cKO	Ptch1 new2	30.5069								Cilk1 cKO	Ptch1 new2	30.5379
	Cilk1 cKO	Gli1	28.8589	28.7552	8.17275	-1.86764	1.86764	3.64935			Cilk1 cKO	Gli1	28.8762	28.9476	8.27601	-1.56442	1.56442	2.95759
	Cilk1 cKO	Gli1	28.7191								Cilk1 cKO	Gli1	28.9378
	Cilk1 cKO	Gli1	28.6876								Cilk1 cKO	Gli1	29.0287
					10.0404										9.84043
	Sample Name	Target Name	Cт	Cт mean	ΔCt	ΔΔCt	(-)ΔΔCт	2^(-)ΔΔCт			Sample Name	Target Name	Cт	Cт mean	ΔCt	ΔΔCt	(-)ΔΔCт	2^(-)ΔΔCт
	Cilk1 ctrl	GAPDH	17.7134	17.6497	0	-10.544	10.544	1493.04			Cilk1 ctrl	GAPDH	17.6485	17.6201	0	-10.8398	10.8398	1832.74
	Cilk1 ctrl	GAPDH	17.6203								Cilk1 ctrl	GAPDH	17.6147
	Cilk1 ctrl	GAPDH	17.6156								Cilk1 ctrl	GAPDH	17.5973
	Cilk1 ctrl	Ptch1 2018	27.3058	27.2798	9.63004	-0.914001	0.914001	1.88426			Cilk1 ctrl	Ptch1 2018	27.2635	27.2855	9.66535	-1.17444	1.17444	2.25705
	Cilk1 ctrl	Ptch1 2018	27.1738								Cilk1 ctrl	Ptch1 2018	27.2271
	Cilk1 ctrl	Ptch1 2018	27.3597								Cilk1 ctrl	Ptch1 2018	27.3659
	Cilk1 ctrl	Ptch1 new2	26.7744	26.7446	9.09483	-1.4492	1.4492	2.73057			Cilk1 ctrl	Ptch1 new2	26.6987	26.6396	9.01946	-1.82032	1.82032	3.5316
	Cilk1 ctrl	Ptch1 new2	26.7251								Cilk1 ctrl	Ptch1 new2	26.5797
	Cilk1 ctrl	Ptch1 new2	26.7342								Cilk1 ctrl	Ptch1 new2	26.6405
	Cilk1 ctrl	Gli1	24.934	24.9054	7.2557	-3.28834	3.28834	9.76988			Cilk1 ctrl	Gli1	24.9414	24.8667	7.24657	-3.59321	3.59321	12.0688
	Cilk1 ctrl	Gli1	24.8956								Cilk1 ctrl	Gli1	24.8
	Cilk1 ctrl	Gli1	24.8867								Cilk1 ctrl	Gli1	24.8588
	Cilk1 cKO	GAPDH	19.7296	19.7229	0	-10.544	10.544	1493.04			Cilk1 cKO	GAPDH	19.7925	19.7612	0	-10.8398	10.8398	1832.74
	Cilk1 cKO	GAPDH	19.7382								Cilk1 cKO	GAPDH	19.7506
	Cilk1 cKO	GAPDH	19.7009								Cilk1 cKO	GAPDH	19.7406
	Cilk1 cKO	Ptch1 2018	30.3359	30.2669	10.544	0	0	1			Cilk1 cKO	Ptch1 2018	30.7057	30.601	10.8398	0	0	1
	Cilk1 cKO	Ptch1 2018	30.1307								Cilk1 cKO	Ptch1 2018	30.5654
	Cilk1 cKO	Ptch1 2018	30.3342								Cilk1 cKO	Ptch1 2018	30.5319
	Cilk1 cKO	Ptch1 new2	29.9993	30.1142	10.3913	-0.152724	0.152724	1.11167			Cilk1 cKO	Ptch1 new2	30.054	30.0658	10.3046	-0.535201	0.535201	1.44914
	Cilk1 cKO	Ptch1 new2	30.068								Cilk1 cKO	Ptch1 new2	29.964
	Cilk1 cKO	Ptch1 new2	30.2753								Cilk1 cKO	Ptch1 new2	30.1795
	Cilk1 cKO	Gli1	29.3551	29.0941	9.3712	-1.17283	1.17283	2.25454			Cilk1 cKO	Gli1	29.0722	29.0501	9.28884	-1.55095	1.55095	2.93009
	Cilk1 cKO	Gli1	28.9687								Cilk1 cKO	Gli1	28.9919
	Cilk1 cKO	Gli1	28.9586								Cilk1 cKO	Gli1	29.0862
					10.544										10.8398
	Sample Name	Target Name	ΔCt	ave ΔCt	ΔΔCt	2^(-)ΔΔCт	average	ster	t-test				Average	Ptch1	Gli1
	Cilk1 ctrl2	Ptch1 new2	8.69197	8.64583	0.0461423	0.968523	1.03598	0.125448	0.00650784				Control	1.03598	1.02695
			8.77965		0.133819	0.911415							Cilk1 cKO	0.428682	0.28707
			8.11482		-0.531009	1.44494
			8.17425		-0.471585	1.38663							STER	Ptch1	Gli1
			9.09483		0.449002	0.732549							Control	0.125448	0.100134
			9.01946		0.37363	0.771838							Cilk1 cKO	0.0593548	0.0380131
	Cilk1 cKO	Ptch1 new2	9.15933		0.5135	0.700521	0.428682	0.0593548
			9.84043		1.1946	0.436908
			10.3913		1.74548	0.298234
			10.3046		1.65875	0.316713
			10.0311		1.3853	0.38281
			9.84043		1.1946	0.436908
	Cilk1 ctrl2	Gli1	6.53551	6.77677	-0.24126	1.18202	1.02695	0.100134	0.00120749
			6.63909		-0.137675	1.10013
			7.2557		0.47893	0.71751
			7.24657		0.469807	0.722061
			6.41629		-0.360474	1.28385
			6.56744		-0.209327	1.15615
	Cilk1 cKO	Ptch1 new2	8.34912		1.57236	0.336259	0.28707	0.0380131
			8.4592		1.68244	0.311556
			8.17275		1.39598	0.379986
			8.27601		1.49924	0.353739
			9.3712		2.59444	0.165576
			9.28884		2.51207	0.175303

## Sheet: in situ intensity data combined
Duct #	1	2	3	4	5	6	7	8	9	10	11	12	13	14	15	16	17	18	19	20	21	22	23	24	25	26	27	28	29	30	31	32	33	34	35	36	37	38	39	40	41	42		Min
Atoh1-Ctrl		93959	103535	89351	109054	125204	128009	117316							116095	81638	78551	73400		77691	70285	58590	65302				48382	45120	26699	16492	-5449	-10984	-8767	-14062	-1191	-2168	-13648	-925	-8760	-1396	-5798	-13886		16492
Atoh1-cKO		96129	101955	92314	104397	76242	104043	85266	149106	164298					78524	88405	53572	39322	68168	83928	41765	70184				24290	29122	21467	-3018	-23440	-22593	-7791	-10512
Sox2-Ctrl	244099	255364	239806	181446	195214	153035	294051	317156	271450						242644	290331	280221	264146	147666	176291	223220	243580	310926	241455			196440	200069	152244	174996	173619	146100	259422								221268	143252		77917
Sox2-cKO	264831	295736	246162	312777	259936	249919	211046	211046	289698							311987	229534	229534	242869	255876	273248						259018	227462	256106	312204	308088
Ptch1-Ctrl	225708	291123	294123	372917	427165	386993	464597	429400								370099	418738	497773	561954	556065	534134	485807	643110	506365	476634		510228	570323	764938	692875	716158	816831	816833	848903	843582				842237	900148	809338			225708
Ptch1-cKO	388167	383607	307142	326416	455300	436427	410674	470355	486411	406109					373404	478602	550592	403340	509056	458985	477824	396544	526936	490020		582280	589769	723468	771681	645915	768672	656756	543184
Gli1-Ctrl	99813	107024	113680	118173	127283	141438	100146	118048									125423	199480	211045	252838	253231	282586	243138	316322	249075	279691	295573	384284	286034	348455	350111	363003	362787	435925	371071				484580	321485	344009	308368		99813
Gli1-cKO	88217	85927	71329		77848	97397	99760	147366	130998	105698					57923	124969	79780	101550	90024	121060	102173	108038	62395	231239	180142	250747	249194	236081	213950	221579	185763		237480
minus Min																																												Max of minus min
Atoh1-Ctrl		77467	87043	72859	92562	108712	111517	100824							99603	65146	62059	56908	-16492	61199	53793	42098	48810				31890	28628	10207	0	-21941	-27476	-25259	-30554	-17683	-18660	-30140	-17417	-25252	-17888	-22290	-30378		111517
Atoh1-cKO		79637	85463	75822	87905	59750	87551	68774	132614	147806					62032	71913	37080	22830	51676	67436	25273	53692				7798	12630	4975	-19510	-39932	-39085	-24283	-27004
Sox2-Ctrl	166182	177447	161889	103529	117297	75118	216134	239239	193533						164727	212414	202304	186229	69749	98374	145303	165663	233009	163538			118523	122152	74327	97079	95702	68183	181505								143351	65335		239239
Sox2-cKO	186914	217819	168245	234860	182019	172002	133129	133129	211781							234070	151617	151617	164952	177959	195331						181101	149545	178189	234287	230171
Ptch1-Ctrl	0	65415	68415	147209	201457	161285	238889	203692								144391	193030	272065	336246	330357	308426	260099	417402	280657	250926		284520	344615	539230	467167	490450	591123	591125	623195	617874				616529	674440	583630			674440
Ptch1-cKO	162459	157899	81434	100708	229592	210719	184966	244647	260703	180401					147696	252894	324884	177632	283348	233277	252116	170836	301228	264312		356572	364061	497760	545973	420207	542964	431048	317476
Gli1-Ctrl	0	7211	13867	18360	27470	41624.5	333	18235									25610	99667	111232	153025	153418	182773	143325	216509	149262	179878	195760	284471	186221	248642	250298	263190	262974	336112	271258				384767	221672	244196	208555		384767
Gli1-cKO	-11596	-13886	-28484		-21965	-2416	-53	47553	31185	5885					-41890	25156	-20033	1737	-9789	21247	2360	8225	-37418	131426	80329	150934	149381	136268	114137	121766	85950		137667
% value
minus Min	1	2	3	4	5	6	7	8	9	10	11	12	13	14	15	16	17	18	19	20	21	22	23	24	25	26	27	28	29	30	31	32	33	34	35	36	37	38	39	40	41	42
Atoh1-Ctrl		0.694665	0.780536	0.653344	0.830026	0.974847	1	0.904113							0.893164	0.58418	0.556498	0.510308	-0.147888	0.548786	0.482375	0.377503	0.437691				0.285965	0.256714	0.0915286		-0.19675	-0.246384	-0.226504	-0.273985	-0.158568	-0.167329	-0.270273	-0.156182	-0.226441	-0.160406	-0.19988	-0.272407
Atoh1-cKO		0.714124	0.766367	0.679914	0.788265	0.535793	0.785091	0.616713	1.18918	1.32541					0.556256	0.644861	0.332505	0.204722	0.463391	0.604715	0.226629	0.481469				0.0699266	0.113256	0.044612	-0.174951	-0.35808	-0.350485	-0.217752	-0.242151
Sox2-Ctrl	0.694628	0.741714	0.676683	0.432743	0.490292	0.313987	0.903423	1	0.808953						0.688546	0.887874	0.845615	0.778422	0.291545	0.411195	0.607355	0.692458	0.973959	0.683576			0.495417	0.510586	0.310681	0.405783	0.400027	0.285	0.758676								0.599196	0.273095
Sox2-cKO	0.781286	0.910466	0.703251	0.981696	0.760825	0.718955	0.556469	0.556469	0.885228							0.978394	0.633747	0.633747	0.689486	0.743854	0.816468						0.756988	0.625086	0.744816	0.979301	0.962096
Ptch1-Ctrl	0	0.096813	0.101253	0.217867	0.298153	0.238699	0.353551	0.30146								0.213696	0.285681	0.402651	0.497638	0.488922	0.456465	0.384942	0.617747	0.415367	0.371366		0.421084	0.510024	0.798051	0.691399	0.725857	0.874851	0.874854	0.922317	0.914442				1	0.998159	0.863762
Ptch1-cKO	0.240436	0.233688	0.120521	0.149046	0.339792	0.31186	0.273746	0.362073	0.385836	0.26699					0.218587	0.374279	0.480822	0.262892	0.41935	0.274115	0.373127	0.252834	0.445812	0.510927		0.52772	0.538804	0.619159	0.716715	0.556327	0.754826	0.491857	0.469859
Gli1-Ctrl	0	0.0187412	0.03604	0.0477172	0.0713939	0.108181	0.000865459	0.0473923									0.0665598	0.259032	0.289089	0.397708	0.39873	0.475023	0.372498	0.562702	0.387928	0.467499	0.508775	0.739333	0.483984	0.646214	0.650518	0.684024	0.683463	0.873547	0.704993				1	0.57612	0.634659	0.542029
Gli1-cKO	-0.0301377	-0.0360894	-0.0740292		-0.0570865	-0.00627912	-0.000137746	0.123589	0.0810491	0.015295					-0.108871	0.0653798	-0.0520653	0.00451442	-0.0254414	0.0552204	0.00613358	0.0213766	-0.0972485	0.341573	0.208773	0.392274	0.388238	0.354157	0.296639	0.316467	0.223382		0.357793

## Sheet: Ptch1
Cilk1 cKO
		1		2		3		4		5		6		7		8		9		10		11		12		13		14		15		16		17		18		19		20		21		22		23		24
Ptch1-Ctrl		0		0.0969916		0.10144		0.218268		0.298703		0.239139		0.354203		0.302016																0.21409		0.286208		0.403394		0.498556		0.489824		0.457307		0.385652		0.618887		0.416133
Ptch1-cKO		0.24088		0.234119		0.120743		0.149321		0.340419		0.312436		0.274251		0.362741		0.386547		0.267483										0.218991		0.374969		0.319173		0.263377		0.420123		0.27462		0.373815		0.253301		0.446634		0.511869
[truncated: 18 more columns]

## Sheet: Gli1
Cilk1 cKO
		1		2		3		4		5		6		7		8		9		10		11		12		13		14		15		16		17		18		19		20		21		22		23		24
Gli1-Ctrl		0		0.0187412		0.03604		0.0477172		0.0713939		0.108181		0.000865459		0.0473923																		0.0665598		0.259032		0.289089		0.397708		0.39873		0.475023		0.372498		0.562702
Gli1-cKO		-0.0301377		-0.0360894		-0.0740292				-0.0570865		-0.00627912		-0.000137746		0.123589		0.0810491		0.015295										-0.108871		0.0653798		-0.0520653		0.00451442		-0.0254414		0.0552204		0.00613358		0.0213766		-0.0972485		0.341573
[truncated: 18 more columns]

## Sheet: Atoh1
Cilk1 cKO
		1		2		3		4		5		6		7		8		9		10		11		12		13		14		15		16		17		18		19		20		21		22		23		24
Atoh1-Ctrl				0.65253		0.733191		0.613715		0.77968		0.915716		0.939344		0.884466		1												0.838988		0.548746		0.522743		0.479354				0.515499		0.453116		0.354605		0.411142
Atoh1-cKO				0.670808		0.719882		0.638673		0.740452		0.503294		0.73747		0.579306		1.11705		1.24502										0.522516		0.605746		0.312337		0.192304		0.435284		0.568035		0.212883		0.452265
[truncated: 18 more columns]

## Sheet: Sox2
Cilk1 cKO
		1		2		3		4		5		6		7		8		9		10		11		12		13		14		15		16		17		18		19		20		21		22		23		24
Sox2-Ctrl		0.694628		0.741714		0.676683		0.432743		0.490292		0.313987		0.903423		1		0.808953												0.688546		0.887874		0.845615		0.778422		0.291545		0.411195		0.607355		0.692458		0.973959		0.683576
Sox2-cKO		0.781286		0.910466		0.703251		0.981696		0.760825		0.718955		0.556469		0.556469		0.885228														0.978394		0.633747		0.633747		0.689486		0.743854		0.816468
[truncated: 18 more columns]
