# Supplementary material for: Dysregulation of sonic hedgehog signaling causes hearing loss in ciliopathy mouse models
Source: eLife. 2020 Dec 31;9:e56551. doi: 10.7554/eLife.56551 (PMC7806262; doi:10.7554/eLife.56551)
Supplement: Figure 7—figure supplement 3—source data 1. [file elife-56551-fig7-figsupp3-data1.xlsx]

## Sheet: In situ intensity data combined
Duct #	1	2	3	4	5	6	7	8	9	10	11	12	13	14	15	16	17	18	19	20	21	22	23	24	25	26	27	28	29	30	31	32	33	34	35	36	37	38	39	40	41	42	43	Min	max
Fst-Ctrl	246741		210256	199638	77062	202262										320646			270869	248443	352486		322287	358040			365412		362510	489287	434733	425347	501395			550965	522868	647162	505630	536923				246741
Fst-cKO	230908	242993	194514	246265	167818	281191										281597	367768	292330	292881	403783	341396						393715	472716	433876		520734	459813	515327	478810
A2m-Ctrl	307109	304445	258734	220260	211264	214591	228575	140001	96166	97473				7638	42986	4162	42318	73525	53487	74825	79591	-9593	11489	60139	33669	50761	-2758	-3485	-29619	31721	48911	-5202	78134	-26420	14202	-47827	25993	-12210	-32794	72956	32467	51049	97473
A2m-cKO	305000	268992	219461	229114	216412	249244	33404.5	451.632						4085.88	-20090.3	-10364.7	1866.85	39459.9	-11897.3	76340.5	30058.8	42133.8	-24168	22193.6	44132.8	52629	44364.3	24715.8	26657.7	-27681.6		6642.41	20349.5	-288.588	-8931.55	-598.372	31213.2
Msx1-Ctrl	6420	5213	18261	-40468	8095	7979	2314	23014	19295	12471	2709				27517	6543	-2553	29387	-7674	10685	-34781	42800	66044						71601	60210	36830	44968	147454	142384	140947	166494	182112	258551	200454	165470				42800
Msx1-cKO	-1094	-1005	-1707	-3866	3963	16770	4503	4568						1227	-1894	14484	-4417	13463	15834	19684	18770	2233					49157	56207	74774	73034	49644	84252	96792	147208
Inhba-Ctrl	460985	298669	159523	170158	160384	161977	151145	83653	51915	59787	5751				-5308	-5309	-28846	-28450	844	6383	11601	-82	3497	-8893	15298	24275	-4732	3466	-172	-7335	39227	5621	2843	-7452	-58135	-2333	-10321	20361	-23249	-43623				5751
Inhba-cKO	466056	359885	189033	73984.1	41294.1	59085.8						3325.71	15980.9	4644.59	19398.3	9047.37	2534.93	12628.8	15387.5	3969.17	-12181.3	-3763.48	37904.4	5150.47	-3427.16	-41.6929	2072.14	6071.88	15787.7	-5689.7	-5574.34	9508.77	-39462.4	-60452	21178.6
minus Min																																												Max of minus min
Fst-Ctrl	0		-36485	-47103	-169679	-44479										73905			24128	1702	105745		75546	111299			118671		115769	242546	187992	178606	254654			304224	276127	400421	258889	290182				400421
Fst-cKO	-15833	-3748	-52227	-476	-78923	34450										34856	121027	45589	46140	157042	94655						146974	225975	187135		273993	213072	268586	232069										273993
A2m-Ctrl	209636	206972	161261	122787	113791	117118	131102	42528	-1307	0					-54487	-93311	-55155	-23948	-43986	-22648	-17882	-107066	-85984	-37334	-63804	-46712	-100231	-100958	-127092	-65752	-48562	-102675	-19339	-123893	-83271	-145300	-71480	-109683	-130267	-24517	-65006	-46424		209636
A2m-cKO	207527	171519	121988	131641	118939	151771	-64068.5	-97021.4						-93387.1	-117563	-107838	-95606.1	-58013.1	-109370	-21132.5	-67414.2	-55339.2	-121641	-75279.4	-53340.2	-44844	-53108.7	-72757.2	-70815.3	-125155		-90830.6	-77123.5											207527
Msx1-Ctrl	-36380	-37587	-24539	-83268	-34705	-34821	-40486	-19786	-23505	-30329	-40091				-15283	-36257	-45353	-13413	-50474	-32115	-77581	0	23244						28801	17410	-5970	2168	104654	99584	98147	123694	139312	215751	157654	122670	-42800	-42800	-42800	215751
Msx1-cKO	-43894	-43805	-44507	-46666	-38837	-26030	-38297	-38232						-41573	-44694	-28316	-47217	-29337	-26966	-23116	-24030	-40567					6357	13407	31974	30234	6844	41452	53992	104408										104408
Inhba-Ctrl	455234	292918	153772	164407	154633	156226	145394	77902	46164	54036	0				-11059	-11060	-34597	-34201	-4907	632	5850	-5833	-2254	-14644	9547	18524	-10483	-2285	-5923	-13086	33476	-130	-2908	-13203	-63886	-8084	-16072	14610	-29000	-49374	-5751	-5751	-5751	455234
Inhba-cKO	460305	354134	183282	68233.1	35543.1	53334.8						-2425.29	10229.9	-1106.41	13647.3	3296.37	-3216.07	6877.79	9636.47	-1781.83	-17932.3	-9514.48	32153.4	-600.533	-9178.16	-5792.69	-3678.86	320.88	10036.7	-11440.7	-11325.3													460305
% value
minus Min
Fst-Ctrl	0		-0.0911166	-0.117634	-0.423752	-0.111081										0.184568			0.0602566	0.00425053	0.264085	0	0.188666	0.277955			0.296366		0.289118	0.605727	0.469486	0.446046	0.635966			0.75976	0.689592	1	0.646542	0.724692
Fst-cKO	-0.0395409	-0.00936015	-0.13043	-0.00118875	-0.1971	0.0860344										0.0870484	0.302249	0.113853	0.115229	0.392192	0.236389						0.367049	0.564344	0.467346		0.684262	0.53212	0.670759	0.579563
A2m-Ctrl	1	0.987292	0.769243	0.585715	0.542803	0.558673	0.625379	0.202866	-0.00623462	0					-0.259912	-0.44511	-0.263099	-0.114236	-0.209821	-0.108035	-0.0853002	-0.510723	-0.410159	-0.17809	-0.304356	-0.222824	-0.478119	-0.481587	-0.606251	-0.313648	-0.231649	-0.489778	-0.0922504	-0.590991	-0.397217	-0.693106	-0.340972	-0.523207	-0.621396	-0.11695	-0.31009	-0.221451
A2m-cKO	0.98994	0.818174	0.581902	0.627948	0.567358	0.723973	-0.305618	-0.462809						-0.445473	-0.560797	-0.514405	-0.456058	-0.276732	-0.521715	-0.100806	-0.321577	-0.263977	-0.580249	-0.359096	-0.254442
Msx1-Ctrl	-0.16916	-0.173982	-0.113738	-0.385945	-0.160857	-0.161394	-0.187652	-0.0917076	-0.108945	-0.140574	-0.185821				-0.0708363	-0.16805	-0.21021	-0.0621689	-0.233946	-0.148852	-0.359586	0	0.107735						0.133492	0.0806949	-0.0276708	0.0100486	0.485068	0.461569	0.454909	0.573318	0.645707	1	0.730722	0.568572	-0.198377	-0.198377	-0.198377
Msx1-cKO	-0.203447	-0.203035	-0.206289	-0.216296	-0.180008	-0.120648	-0.177506	-0.177204						-0.19269	-0.207155	-0.131244	-0.21885	-0.135976	-0.124987	-0.107142	-0.111378	-0.188027	0				0.0294645	0.0621411	0.148199	0.140134	0.0317218	0.192129	0.250251	0.483928
Inhba-Ctrl	1	0.643445	0.337787	0.361148	0.339678	0.343177	0.319383	0.171125	0.101407	0.118699					-0.024293	-0.0242952	-0.0759983	-0.0751284	-0.0107791	0.0013883	0.0128505	-0.0128132	-0.0049513	-0.0321681	0.0209716	0.0406912	-0.0230277	-0.0050194	-0.0130109	-0.0287457	0.0735358		-0.00638792	-0.0290027	-0.140337	-0.0177579	-0.0353049	0.0320934	-0.0637035	-0.108459	-0.0126331	-0.0126331	-0.0126331
Inhba-cKO	1.01114	0.777915	0.40261	0.149886	0.0780765	0.117159						-0.00532758	0.0224717	-0.00243042	0.0299787	0.00724104	-0.00706465	0.0151082	0.0211682	-0.0039141	-0.0393914	-0.0209002	0.0706306	-0.00131918	-0.0201614	-0.0127246	-0.00808125	0.000704869	0.0220474	-0.0251315	-0.0248781

## Sheet: Cilk1 cKO Fst Inhba
		1		2		3		4		5		6		7		8		9		10		11		12		13		14		15		16		17		18		19		20		21		22		23		24
Fst-Ctrl						-0.0911166		-0.117634		-0.423752		-0.111081																				0.184568						0.0602566				0.264085						0.277955
Fst-cKO		-0.0395409		-0.00936015		-0.13043		-0.00118875		-0.1971		0.0460344																				0.0870484		0.202249		0.113853		0.115229		0.292192		0.236389
Inhba-Ctrl		1		0.643445		0.337787		0.361148		0.339678						0.171125		0.101407		0.118699										-0.024293		-0.0242952		-0.0759983		-0.0751284		-0.0107791		0.0013883		0.0128505		-0.0128132		-0.0049513		-0.0321681
Inhba-cKO		1.01114		0.777915		0.40261		0.149886		0.0780765		0.117159												-0.00532758		0.0224717		-0.00243042		0.0299787		0.00724104		-0.00706465		0.0151082		0.0211682		-0.0039141		-0.0393914		-0.0209002		0.0706306		-0.0393914
[truncated: 19 more columns]

## Sheet: Cilk1 cKO Msx1 A2m
		1		2		3		4		5		6		7		8		9		10		11		12		13		14		15		16		17		18		19		20		21		22		23		24
Msx1-Ctrl		-0.16916		-0.173982		-0.113738		-0.385945		-0.160857		-0.161394		-0.187652		-0.0917076		-0.108945		-0.140574		-0.185821								-0.0708363		-0.16805		-0.21021		-0.0621689		-0.233946		-0.148852		-0.359586
Msx1-cKO		-0.203447		-0.203035		-0.206289		-0.216296		-0.180008		-0.120648		-0.177506		-0.177204												-0.19269		-0.207155		-0.131244		-0.21885		-0.135976		-0.124987		-0.107142		-0.111378		-0.188027		0
A2m-Ctrl		1		0.987292		0.769243		0.585715		0.542803		0.558673		0.625379		0.202866		-0.00623462												-0.259912		-0.44511		-0.263099		-0.114236		-0.209821		-0.108035		-0.0853002		-0.510723		-0.410159		-0.17809
A2m-cKO		0.98994		0.818174		0.581902		0.627948		0.567358		0.723973		-0.105618		-0.162809												-0.145473		-0.160797		-0.114405		-0.156058		-0.276732		-0.121715		-0.100806		-0.121577		-0.263977		-0.180249		-0.359096
[truncated: 14 more columns]
