# Supplementary material for: Dysregulation of sonic hedgehog signaling causes hearing loss in ciliopathy mouse models
Source: eLife. 2020 Dec 31;9:e56551. doi: 10.7554/eLife.56551 (PMC7806262; doi:10.7554/eLife.56551)
Supplement: Figure 7—source data 1. [file elife-56551-fig7-data1.xlsx]

## Sheet: ABR
4wks			*	*	*				*
	Click	3	4	6	8	10	12	18	24	30	42
FI362(R1)_Flox_F	20	65	40	35	40	20	15	15	25	25	60
FI351(L2)_lox/+_M	25	70	60	40	25	20	25	20	25	45	90
FI374(R1)_Flox_M	30	70	65	45	40	50	65	50	55	75	95
FI376(R3)_DH_M	25	65	55	50	35	30	25	20	25	30	80
FI425(R4)_lox/+_F	30	60	55	35	25	25	25	15	25	40	70	17.6g
FI420(L3)_Flox_F	30	70	60	40	35	35	35	25	30	50	85	16.0g
FI459(L1R1)_lox/+_M	25	60	45	40	15	15	30	15	20	30	75
FI364(R3)_cKO_F	30	85	80	70	65	45	30	25	25	45	80
FI352(L3)_cKO_M	30	85	80	85	50	40	30	20	30	45	65
FI417(R3)_cKO_M	35	70	60	50	30	30	35	35	30	45	85	8.4g
FI427(L3R3)_cKO_F	55	80	75	70	60	50	40	40	45	65	95	6.3g
FI454(R1)_cKO_M	30	85	85	55	45	35	35	30	40	45	90
FI446(L3)_cKO_F	25	70	65	40	50	45	40	35	30	40	85
SD
Control	26.4286	65.7143	54.2857	40.7143	30.7143	27.8571	31.4286	22.8571	29.2857	42.1429	79.2857
cKO	34.1667	79.1667	74.1667	61.6667	50	40.8333	35	30.8333	33.3333	47.5	83.3333
	ns	ns	*	**	*	ns	ns	ns	ns	ns	ns
	Click	3	4	6	8	10	12	18	24	30	42
Control (n=7)	26.4286	65.7143	54.2857	40.7143	30.7143	27.8571	31.4286	22.8571	29.2857	42.1429	79.2857
Cilk1 cKO (n=6)	34.1667	79.1667	74.1667	61.6667	50	40.8333	35	30.8333	33.3333	47.5	83.3333
FI 4wks control SEM	1.42857	1.70034	3.3503	2.02031	3.52349	4.47974	6.04687	4.73804	4.42242	6.44179	4.55503	N=7
FI 4wks cKO SEM	4.36208	3.00463	3.96162	6.66667	5	3.00463	1.82574	3.00463	3.07318	3.59398	4.21637	N=6

## Sheet: DPOAE
			DPOAE threshold	***	***	ns	ns	ns	ns	ns	ns
		Name	Genotype	6	8	10	12	16	18	24	30
		FI351	lox/+_M	45	25	30	40	45	35	50	65
		FI362	Flox_F	50	30	35	50	45	35	45	50
		FI374	Flox_M	45	35	30	45	35	40	60	70
		FI376	DH_M	50	20	25	35	35	25	40	40
		FI425	lox/+_F	50	35	30	50	40	35	55	70
		FI420	Flox_F	45	20	30	35	30	35	50	50
		FI459	lox/+_M	40	20	25	35	30	30	40	55
		FI352	cKO_M	55	35	30	45	25	25	35	40
		FI364	cKO_F	60	60	50	55	40	45	70	70
		FI417	cKO_M	80	40	35	45	40	40	50	50
		FI427	cKO_F	80	80	60	65	45	45	55	65
		FI454	cKO_M	55	40	30	45	30	55	55	65
		FI446	cKO_F	80	55	45	40	35	35	45	45
			Genotype	6	8	10	12	16	18	24	30
			Control (n=7)	46.4286	26.4286	29.2857	41.4286	37.1429	33.5714	48.5714	57.1429
			Cilk1 KO (n=6)	68.3333	51.6667	41.6667	49.1667	35.8333	40.8333	51.6667	55.8333
			Control SEM	1.42857	2.6082	1.3041	2.6082	2.40464	1.79758	2.82722	4.34483
			Cilk1 cKO SEM	5.27046	6.91215	4.94413	3.74537	3.00463	4.16667	4.77261	5.06897

## Sheet: ABR IO-8kHz
	CONTROL				CONTROL
	362	Level(dB)	P1			P1
		30			30	5.52533
		40	6.325		40	8.6715
		50	9.751		50	9.9572
		60	15.358		60	8.49017
		70	14.166		70	14.0382
		80	29.712		80	25.2933
		90	37.323		90	31.4125
					STDEV
	351	Level(dB)	P1		30	0.903783
		30			40	3.04587
		40			50	4.58788
		50	11.463		60	6.05043
		60	1.381		70	6.0746
		70	17.913		80	10.7118
		80	22.308		90	11.9066
		90	35.499		SEM
					30	0.368968
	374	Level(dB)	P1		40	1.24347
		30			50	1.873
		40			60	2.47008
		50			70	2.47995
		60	5.342		80	4.37309
		70	6.15		90	4.86086
		80	5.976
		90	12.814
	376	Level(dB)	P1
		30	6.562		Cilk1 cKO
		40	12.998			P1
		50	3.495		30
		60	11.404		40
		70	22.431		50	6.3165
		80	33.11		60	7.411
		90	30.009		70	10.9882
					80	21.0788
	420	Level(dB)	P1		90	32.9522
		30	4.903		STDEV
		40	6.774		30
		50	8.878		40
		60	2.948		50	4.63226
		70	8.134		60	3.03625
		80	24.834		70	4.66194
		90	25.029		80	17.5553
					90	22.9467
	459	Level(dB)	P1		SEM
		30	5.111		30
		40	8.589		40
		50	16.199		50	1.89111
		60	14.508		60	1.23954
		70	15.435		70	1.90323
		80	35.82		80	7.16692
		90	47.801		90	9.36793
					amplitude
						P1
						Control	Cilk1 cKO
					0
					10
					20
					30	0.110507
					40	0.17343
				ns	50	0.199144	0.12633
				ns	60	0.169803	0.14822
				ns	70	0.280763	0.219763
				ns	80	0.505867	0.421577
				ns	90	0.62825	0.659043
					STDEV
					0
					10
					20
					30	0.00737936
					40	0.0248694
					50	0.0374599	0.0378222
					60	0.0494016	0.0247909
					70	0.0495989	0.0380645
					80	0.0874619	0.143338
					90	0.0972172	0.187359
										Ick cKO = Cilk1 cKO
	Cilk1 cKO
	364	Level(dB)	P1
		30
		40
		50
		60	7.382
		70	9.507
		80	11.058
		90	21.133
	352	Level(dB)	P1
		30
		40
		50
		60
		70	8.301
		80	55.586
		90	78.312
	417	Level(dB)	P1
		30
		40
		50	9.592
		60	7.109
		70	19.355
		80	21.23
		90	30.771
	427	Level(dB)	P1
		30
		40
		50
		60	8.224
		70	13.491
		80	8.535
		90	30.14
	454	Level(dB)	P1
		30
		40
		50
		60	2.927
		70	8.153
		80	11.927
		90	21.453
	446	Level(dB)	P1
		30
		40
		50	3.041
		60	11.413
		70	7.122
		80	18.137
		90	15.904

## Sheet: ABR IO-18kHz
	CONTROL				CONTROL
	362	Level(dB)	P1			P1
		30	7.018		30	9.82325
		40	11.778		40	8.13933
		50	6.279		50	8.389
		60	7.305		60	10.102
		70	15.041		70	12.6741
		80	13.424		80	15.8046
		90	17.898		90	19.4706
					STDEV
	351	Level(dB)	P1		30	2.12178
		30			40	4.36794
		40			50	5.02433
		50	5.267		60	3.46314
		60	6.725		70	4.6642
		70	8.957		80	7.2025
		80	13.401		90	5.5654
		90	14.814		SEM
					30	0.801957
	374	Level(dB)	P1		40	1.65093
		30			50	1.89902
		40	3.329		60	1.30895
		50	2.457		70	1.7629
		60	6.424		80	2.72229
		70	4.741		90	2.10352
		80	5.422
		90	10.577
	376	Level(dB)	P1
		30			Cilk1 cKO
		40	7.103			P1
		50	18.217		30	5.21767
		60	10.857		40	7.083
		70	11.108		50	9.20667
		80	17.797		60	12.8802
		90	22.48		70	18.843
					80	15.951
	425	Level(dB)	P1		90	18.2043
		30	11.467		STDEV
		40	11.937		30	2.24974
		50	7.943		40	3.87311
		60	11.856		50	6.43979
		70	17.197		60	7.50167
		80	15.718		70	6.22841
		90	25.393		80	5.67409
					90	4.33885
	420	Level(dB)	P1		SEM
		30	11.467		30	0.918455
		40	11.941		40	1.58119
		50	7.92		50	2.62903
		60	11.7		60	3.06254
		70	17.458		70	2.54274
		80	15.36		80	2.31644
		90	25.672		90	1.77133
	459	Level(dB)	P1
		30	9.341
		40	2.748		amplitude
		50	10.64			P1
		60	15.847			Control	Cilk1 cKO
		70	14.217		0
		80	29.51		10
		90	19.46		20
				ns	30	0.196465	0.104353
				ns	40	0.162787	0.14166
				ns	50	0.16778	0.184133
				ns	60	0.20204	0.257603
				ns	70	0.253483	0.37686
				ns	80	0.316091	0.31902
				ns	90	0.389411	0.364087
					STDEV
					0
					10
					20
					30	0.0424356	0.0449949
					40	0.0873588	0.0774623
					50	0.100487	0.128796
					60	0.0692629	0.150033
					70	0.093284	0.124568
					80	0.14405	0.113482
					90	0.111308	0.086777
	Cilk1 cKO
	364	Level(dB)	P1
		30	7.794
		40	12.646
		50	18.891
		60	20.931
		70	24.16
		80	18.853
		90	14.442
	352	Level(dB)	P1
		30	3.641
		40	4.285
		50	0.547
		60	22.346
		70	27.375
		80	13.566
		90	17.679
	417	Level(dB)	P1
		30
		40
		50	6.906
		60	10.784
		70	20.918
		80	24.57
		90	23.777
	427	Level(dB)	P1
		30
		40
		50	14.011
		60	7.813
		70	13.679
		80	18.32
		90	23.436
	454	Level(dB)	P1
		30	4.218
		40	6.797
		50	6.032
		60	3.051
		70	12.042
		80	10.825
		90	14.807
	446	Level(dB)	P1
		30
		40	4.604
		50	8.853
		60	12.356
		70	14.884
		80	9.572
		90	15.085

## Sheet: DPOAE 8kHz
	8kHz
						*	*	*	*	*	**	***	**	**	ns
	Name	Genotype	20	25	30	35	40	45	50	55	60	65	70	75	80	dB
DP	FI351	lox/+_M	-5.64167	0.582667	6.036	10.5983	16.1513	20.3253	22.7933	24.4377	27.102	31.8043	34.356	31.892	43.7377
	FI362	Flox_F	-16.138	-11.6793	-4.58367	-0.298333	4.52833	8.84933	14.993	19.8977	23.2553	27.0613	31.8617	36.829	34.659
	FI374	Flox_M	-16.3893	-14.6387	-11.2043	-4.00467	2	9.306	15.9557	21.1523	25.3483	29.762	32.4897	14.928	36.828
	FI376	DH_M	-3.33533	1.24033	5.525	9.833	14.764	17.8097	21.0653	26.363	31.8877	36.441	33.5043	42.542	48.1727
	FI425	lox/+_F	-20.7087	-16.9617	-10.096	-4.78367	0.233	6.88033	14.0387	19.312	22.9033	26.6183	31.0613	31.8067	30.2563
	FI420	Flox_F	-9.376	-4.055	0.959	6.66867	12.7537	18.3753	22.2553	25.6283	30.1373	33.3937	37.6043	32.298	45.625
	FI459	lox/+_M	-2.402	3.16967	6.49033	9.76967	14.3983	18.5843	21.744	25.4097	30.5687	34.3033	37.5573	29.9513	46.1413
	FI352	cKO_M	-18.7787	-16.706	-8.74967	-5.18767	3.09433	11.0807	16.296	19.612	22.4587	25.1183	24.4593	31.7267	43.7077
	FI364	cKO_F	-16.638	-19.675	-17.6143	-24.06	-7.14167	-7.543	2.843	6.50433	4.96367	7.50167	26.7243	22.597	40.0027
	FI417	cKO_M	-20.9	-18.9573	-15.6957	-8.469	-4.34767	1.82467	6.497	10.2417	13.782	14.382	14.0957	18.8947	35.4267
	FI427	cKO_F	-17.1147	-18.559	-26.688	-18.774	-18.932	-15.911	-23.2227	-18.4603	-18.1603	-19.307	-13.1767	-14.2823	-12.9333
	FI454	cKO_M	-21.8093	-14.9673	-10.4157	-6.60633	-1.734	4.02833	9.65233	14.4137	17.715	21.0727	21.6983	9.48667	31.3553
	FI446	cKO_F	-20.389	-17.5663	-15.8087	-17.246	-22.9787	-8.42033	-7.21533	-5.00467	-6.587	-0.624	4.669	1.103	13.22
			-10.5701	-6.04886	-0.981952	3.969	9.26124	14.3043	18.9779	23.1715	27.3147	31.3406	34.0621	31.4639	40.7743
			-19.2716	-17.7385	-15.8287	-13.3905	-8.67328	-2.49011	0.808389	4.55111	5.69533	8.02394	13.0783	11.5876	25.1298
			-8.53003	-8.48556	-9.05426	-9.69695	-8.18838	-8.03308	-6.76953	-5.29357	-4.25546	-2.47575	1.09922	4.75559	7.62657
		Control SEM	2.72742	3.12685	2.89388	2.57122	2.5494	2.14525	1.4369	1.1183	1.37424	1.40005	0.993798	3.19311	2.57945
		cKO SEM	0.859681	0.699616	2.5855	3.13697	4.1536	4.02531	5.76325	5.71879	6.35442	6.64568	6.19441	6.74234	8.75931
	Name	Genotype
NF+2SD	FI351	lox/+_M	-7.82755	-8.73597	-9.22909	-8.60776	-9.31892	-6.98076	-7.44637	-2.52827	0.0735263	6.22777	11.8069	13.6994	14.5452
	FI362	Flox_F	-8.67328	-9.00196	-10.1479	-6.71694	-11.6508	-5.09877	-4.85089	-7.28882	-2.98139	-5.34331	3.18245	7.7731	15.443
	FI374	Flox_M	-11.1624	-11.2867	-9.87536	-7.64029	-9.61161	-8.32978	-7.72221	-12.1292	-7.76484	-7.01344	-4.63906	-1.58149	-1.87341
	FI376	DH_M	-9.61434	-11.2887	-10.4741	-9.82446	-9.81067	-8.04524	-6.03118	-3.2909	3.44948	6.0004	10.3	16.3566	16.9349
	FI425	lox/+_F	-9.93398	-10.3974	-8.18334	-9.64241	-9.86755	-9.59361	-10.1812	-8.17437	-6.90643	-3.19653	0.476511	2.22133	9.82143
	FI420	Flox_F	-12.6754	-9.77973	-10.6964	-9.86531	-10.0641	-9.07036	-6.78801	-3.99252	0.763262	3.56287	8.13966	16.8895	20.7414
	FI459	lox/+_M	-8.87976	-8.5729	-10.4326	-7.616	-9.54348	-7.03519	-5.0951	-3.45835	0.714781	5.66751	12.8525	18.5098	14.5201
	FI352	cKO_M	-7.40659	-8.97085	-8.31185	-9.65956	-8.5973	-7.69773	-8.68612	-6.18445	-4.89728	-4.32623	1.64605	5.56394	9.64045
	FI364	cKO_F	4.67274	4.61799	-0.351458	-13.6496	17.3865	-5.45118	3.30571	15.7904	-0.946886	3.0281	0.81291	3.93938	15.396
	FI417	cKO_M	-10.0794	-11.0966	-12.1526	-10.8752	-10.3858	-8.48971	-7.19992	-8.09547	-7.90169	-8.42027	-4.61405	2.52669	3.78993
	FI427	cKO_F	-12.5023	-9.63367	-9.75076	-11.7435	-11.2672	-9.90414	-11.0284	-9.92989	-10.2801	-12.7681	-8.9744	-9.91192	-8.93476
	FI454	cKO_M	-7.48797	-9.55488	-9.86166	-9.08954	-11.8475	-10.726	-7.92283	-10.6721	-8.79933	-6.77232	-6.77206	-4.35167	-2.3373
	FI446	cKO_F	-9.32009	-6.61092	-8.2382	-11.1298	-11.8705	-8.00764	-8.35742	-8.86249	-9.84411	-8.83121	-9.92754	-9.8119	-8.54158

## Sheet: DPOAE 18kHz
	18kHz
			ns	ns	ns	ns	ns	ns	ns	ns	ns	ns	ns	ns	ns
	Name	Genotype	20	25	30	35	40	45	50	55	60	65	70	75	80	dB
DP	FI351	lox/+_M	-17.4913	-18.3617	-8.271	-3.29367	3.98633	9.71067	14.747	18.859	21.9183	23.6897	23.224	20.7557	23.8177
	FI362	Flox_F	-14.9717	-10.6317	-3.618	3.07767	9.98233	16.1033	20.8157	24.3737	25.3817	23.2087	22.771	26.5897	28.7013
	FI374	Flox_M	-16.6223	-14.8423	-17.1347	-10.1333	-1.77167	4.791	11.2597	16.6337	21.0557	24.1367	24.7837	21.5103	14.1063
	FI376	DH_M	-16.2693	-3.09967	0.756667	6.25933	10.048	13.5697	17.2323	21.177	24.9387	28.2923	30.935	34.8747	39.6343
	FI425	lox/+_F	-24.9893	-16.563	-9.78367	0.359667	7.194	12.8443	17.9337	21.7197	24.1137	23.7003	20.2537	23.131	30.0383
	FI420	Flox_F	-16.7267	-16.3907	-10.3	-1.91133	5.25267	10.5383	15.08	18.9843	22.9193	26.6147	29.5963	30.487	31.7077
	FI459	lox/+_M	-7.49367	-8.652	-4.01733	3.21233	6.98	11.4353	15.7837	19.825	23.3547	26.074	26.5297	29.248	36.3463
	FI352	cKO_M	-11.7597	-5.841	1.636	8.63433	14.5227	20.107	23.83	23.361	12.9693	24.7877	29.295	31.9917	41.0327
	FI364	cKO_F	-15.0957	-23.6977	-21.706	-15.494	-16.1367	-9.25433	-3.829	-1.17733	5.399	10.8993	15.737	16.8307	13.4917
	FI417	cKO_M	-23.097	-18.2057	-20.4947	-12.993	-3.58267	3.06633	9.41333	14.918	18.7823	21.8543	23.348	17.776	15.1253
	FI427	cKO_F	-15.5927	-13.068	-14.842	-15.551	-12.426	0.305	5.699	9.20233	10.7857	10.4243	9.57133	10.2523	12.615
	FI454	cKO_M	-16.717	-15.213	-11.525	-4.29367	3.23233	9.51567	14.8237	18.945	22.3067	24.866	25.758	20.957	29.5833
	FI446	cKO_F	-17.413	-21.0347	-12.6967	-1.41367	3.894	8.90233	13.494	17.6567	21.3247	24.069	24.2173	10.0227	31.1227
			-16.3663	-12.6487	-7.48114	-0.347048	5.9531	11.2847	16.1217	20.2246	23.3831	25.1023	25.4419	26.6566	29.1931
			-16.6125	-16.1767	-13.2714	-6.85183	-1.74939	5.44033	10.5718	13.8176	15.2613	19.4834	21.3211	17.9717	23.8284
			-5.28101	-7.76327	-6.42438	-5.91081	-7.23215	-8.67174	-7.10078	-6.7758	-7.6759	-6.88263	-6.29122	-6.80063	-5.53122
		Control SEM	1.93031	2.05866	2.19222	2.04382	1.54016	1.34605	1.12629	0.936237	0.592134	0.721887	1.44766	1.96798	3.1772
		cKO SEM	1.52306	2.59295	3.42245	3.93283	4.63965	4.04823	3.8073	3.55652	2.7163	2.82554	2.97212	3.31455	4.79807
	Name	Genotype
NF+2SD	FI351	lox/+_M	-8.68248	-7.87212	-6.23206	-6.44137	-5.74438	-7.78941	-5.24312	-7.51829	-8.04059	-6.4377	-6.35572	-7.08845	-6.22966
	FI362	Flox_F	-5.15751	-7.51215	-5.21047	-10.0478	-6.75766	-7.59957	-9.90081	-6.07367	-7.47388	-7.35092	-8.49465	-8.82382	-8.14407
	FI374	Flox_M	-8.76123	-8.07441	-8.97777	-8.20066	-7.80971	-8.1937	-6.83435	-9.15892	-6.83272	-8.7969	-8.73588	-9.41634	-9.61796
	FI376	DH_M	-7.02216	-8.76115	-6.93869	-7.54905	-6.48434	-8.56632	-5.25878	-7.93183	-6.49167	-6.69394	-2.95142	-1.06249	-1.18028
	FI425	lox/+_F	-5.09941	-10.7113	-8.75498	-7.28507	-7.2108	-9.50662	-5.4195	-8.00577	-7.20974	-6.30845	-4.99304	-7.13735	-7.85683
	FI420	Flox_F	-6.24484	-5.54685	-4.45921	-7.11852	-7.12305	-7.57641	-7.1425	-8.13216	-8.99735	-5.6642	-7.99207	-7.90595	-5.74234
	FI459	lox/+_M	5.95375	-0.102233	-11.4768	0.33646	-3.8932	-11.7402	-1.42046	-13.5183	-5.43581	1.16381	-0.167966	3.35553	4.03896
	FI352	cKO_M	-7.57788	-9.27618	-9.5889	-9.05205	-8.28358	-8.00638	-8.7195	-7.38707	-8.80829	-8.61089	-8.11291	-7.73792	-7.42635
	FI364	cKO_F	1.61204	-11.5156	8.10599	7.43718	-12.1084	-12.9046	-12.977	6.0059	-13.6354	-12.4682	-3.25076	-11.7045	-0.313532
	FI417	cKO_M	-7.99183	-7.06639	-7.37627	-5.76934	-8.94086	-6.07136	-8.83292	-5.86855	-4.5236	-5.50673	-7.49874	-8.01645	-8.41599
	FI427	cKO_F	-7.69913	-8.95429	-7.97641	-5.6126	-6.85235	-8.672	-6.84259	-8.00493	-6.98733	-8.6604	-7.40454	-7.86167	-10.2294
	FI454	cKO_M	-7.9066	-8.57691	-9.07446	-10.8281	-7.84919	-9.0641	-7.08164	-5.61864	-7.6925	-8.15422	-8.66013	-8.16146	-4.86151
	FI446	cKO_F	-4.07581	-6.95293	-5.55688	-6.70964	-4.96039	-7.04185	-6.63706	-6.87315	-7.65789	-5.98547	-7.16798	-6.84725	-5.92688
