# Supplementary material for: Dysregulation of sonic hedgehog signaling causes hearing loss in ciliopathy mouse models
Source: eLife. 2020 Dec 31;9:e56551. doi: 10.7554/eLife.56551 (PMC7806262; doi:10.7554/eLife.56551)
Supplement: Figure 8—figure supplement 1—source data 1. [file elife-56551-fig8-figsupp1-data1.xlsx]

## Sheet: Measurements_absolute distance
		um scale
	Control	305-571	8-15%	0.801333	0.826333	0.725	0.816667	0.795	0.814333	0.837667	0.805667	0.809667	0.819667	0.834	0.860667	0.781	0.813667	0.8	0.808	0.803	0.801333	0.796667	0.816333	0.822	0.74	0.785333	0.765333	0.772	0.775333	0.764333	0.751	0.816	0.864667	0.849333	0.866	0.882	0.846333	0.829667	0.858	0.874667	0.877	0.867333	0.821667	0.872333	0.861	0.816667	0.786333	0.898333	0.841667
		876-1142	23-30%	0.937667	0.947	0.918667	0.911	0.974333	0.919667	0.906667	0.862	0.902	0.854667	0.901	0.859	0.88	0.846667	0.889	0.918333	0.881333	0.900333	0.97	0.909667	0.970667	0.903	0.968667	0.958	0.939333	0.907667	0.860333	0.917333	0.883333	0.936	0.979667	0.943667	0.945333	0.923667	0.883	0.847333	0.946333	0.85	0.844667	1.00133	0.857667	0.928	0.867333	0.856667	0.922	0.979667
		1447-1713	38-45%	1.07367	1.185	1.117	1.05333	1.03633	1.044	1.055	1.11033	1.14	1.13867	1.108	1.105	1.10867	1.19767	1.106	1.12067	1.18633	1.08833	1.15667	1.14633	1.17967	1.105	1.20067	1.13367	1.19067	1.15067	1.06433	1.15133	1.11067	1.051	1.14067	1.16367	1.22067	1.11667	1.044	1.113	1.135	1.124	1.065	1.07433	1.11867	1.146	1.06967	1.10033	1.13233	1.13067
		2018-2284	53-60%	1.23967	1.177	1.233	1.30933	1.30267	1.26367	1.259	1.23967	1.24767	1.266	1.329	1.28167	1.3	1.29233	1.321	1.28533	1.28767	1.237	1.289	1.315	1.30333	1.292	1.226	1.232	1.299	1.31233	1.28	1.29767	1.337	1.21767	1.313	1.30833	1.32167	1.22367	1.26533	1.26567	1.29067	1.30767	1.32433	1.29533	1.30167	1.197	1.32467	1.27133	1.221	1.266
		2589-2855	68-75%	1.58867	1.59967	1.53733	1.51	1.46433	1.56233	1.571	1.63733	1.54	1.75	1.63367	1.67167	1.773	1.70867	1.69933	1.60233	1.604	1.84933	1.70033	1.58233	1.592	1.74233	1.688	1.65967	1.56333	1.75533	1.66167	1.73367	1.66333	1.61067	1.62033	1.585	1.66767	1.52467	1.51167	1.59967	1.59967	1.42133	1.563	1.554	1.67433	1.54233	1.46833	1.41467	1.666	1.486
			82-90%	1.924	1.689	1.84867	1.83633	1.71467	1.94233	1.74367	1.71267	1.70467	1.92	1.92667	1.73167	1.97067	1.74133	1.92733	1.851	1.83467	1.89	1.95767	1.86967	1.89533	1.666	1.76	1.92767	2.04133	1.96133	2.109	2.21733	1.915	1.84533	1.85667	1.90933	1.87033	1.72867	1.83833	1.69133	1.696	1.72867	1.85267	2.27667	1.91767	1.87167	1.87033	1.764	1.83467	1.764
	Cilk1 cKO	305-571	10-18%	0.665333	0.519667	0.647333	0.666333	0.56	0.528333	0.575333	0.674	0.718333	0.673667	0.738333	0.626667	0.729	0.698333	0.712667	0.615333	0.650333	0.532333	0.580333	0.662	0.629	0.593667	0.593667	0.672333	0.662333	0.696667	0.602667	0.606667	0.534333	0.665333	0.645333	0.677333	0.784667	0.635	0.707333	0.619667	0.658667	0.68	0.690667	0.634333	0.603667	0.508667	0.473	0.493	0.58	0.641333
		876-1142	28-36%	0.874333	1.06267	0.998667	1.013	0.989333	0.823	0.901333	0.817333	0.867	0.836333	0.850667	0.872333	0.839	0.884667	0.912667	0.870333	0.833333	0.806333	0.953	0.776	0.702667	0.898	0.717333	0.826667	0.719667	0.927667	0.840667	0.822	0.946	0.907333	0.811667	0.883667	0.864	0.835333	0.800667	0.759	0.824333	0.848	0.889333	0.669667	0.805333	0.849333	0.819667	0.908667	0.81	0.803
		1447-1713	46-54%	0.983	0.957	0.992667	1.107	0.964333	1.10833	1.01267	1.013	1.10433	1.001	1.039	0.984333	0.973	1.02633	1.13567	1.05133	1.091	0.988667	0.978667	1.08133	1.06933	1.02367	0.966	1.06733	1.00233	1.116	1.05833	1.076	0.885	0.982667	1.12733	1.053	0.992	1.01233	1.07467	1.18733	1.189	1.133	1.05867	1.023	1.01633	1.21833	1.198	1.20833	1.18033	1.19133
		2018-2284	64-72%	1.263	1.33767	1.23733	1.12533	1.22733	1.26833	1.25267	1.09833	1.27967	1.30433	1.319	1.10633	1.302	1.32067	1.295	1.24267	1.308	1.24967	1.268	1.222	1.229	1.14333	1.25333	1.28767	1.32767	1.21	1.332	1.047	1.3	1.13567	1.26567	1.16533	1.26533	1.34433	1.194	1.291	1.176	1.29367	1.289	1.242	1.129	1.27967	1.33733	1.211	1.29133	1.09433
		2589-2855	82-90%	1.94	1.59667	1.59467	1.94367	1.68333	1.57667	1.82933	1.748	1.88267	1.68767	1.591	1.51067	1.61	1.749	1.76267	1.82233	1.76667	1.832	1.64967	1.723	1.728	1.69133	1.822	1.59767	1.93067	1.73033	1.82733	1.40167	1.77833	1.76733	1.47733	1.81967	1.72533	1.92767	1.71367	1.898	1.54533	1.87533	1.53767	1.66333	1.53733	1.75667	1.754	1.76	1.622	1.78767
		3122-3426
			305	571	876	1142	1447	1713	2018	2284	2589	2855	3122	3426
																															X26
[truncated: 48 more columns]

## Sheet: Control_absolute distance
		8~15			average		23~30			average		38~45			average		53~60			average		68~75			average
FI473 RE flox	1	0.854	0.817	0.733	0.801333		0.915	0.915	0.983	0.937667		1.051	1.069	1.101	1.07367		1.264	1.255	1.2	1.23967		1.584	1.59	1.592	1.58867
	2	0.863	0.796	0.82	0.826333		0.946	0.957	0.938	0.947		1.218	1.164	1.173	1.185		1.204	1.127	1.2	1.177		1.6	1.672	1.527	1.59967
	3	0.715	0.721	0.739	0.725		0.927	0.934	0.895	0.918667		1.14	1.119	1.092	1.117		1.227	1.254	1.218	1.233		1.534	1.533	1.545	1.53733
	4	0.811	0.798	0.841	0.816667		0.915	0.917	0.901	0.911		1.051	1.047	1.062	1.05333		1.192	1.368	1.368	1.30933		1.539	1.486	1.505	1.51
	5	0.803	0.802	0.78	0.795		1	0.977	0.946	0.974333		1.012	1.047	1.05	1.03633		1.342	1.299	1.267	1.30267		1.487	1.435	1.471	1.46433
	6	0.804	0.84	0.799	0.814333		0.908	0.887	0.964	0.919667		1.047	1.041	1.044	1.044		1.252	1.255	1.284	1.26367		1.596	1.54	1.551	1.56233
	7	0.85	0.849	0.814	0.837667		0.901	0.889	0.93	0.906667		1.058	1.046	1.061	1.055		1.242	1.223	1.312	1.259		1.633	1.571	1.509	1.571
	8	0.791	0.863	0.763	0.805667		0.866	0.87	0.85	0.862		1.129	1.101	1.101	1.11033		1.221	1.23	1.268	1.23967		1.632	1.686	1.594	1.63733
	9	0.8	0.803	0.826	0.809667		0.914	0.908	0.884	0.902		1.162	1.179	1.079	1.14		1.262	1.271	1.21	1.24767		1.54	1.531	1.549	1.54
	10	0.792	0.816	0.851	0.819667		0.85	0.847	0.867	0.854667		1.134	1.151	1.131	1.13867		1.189	1.229	1.38	1.266		1.791	1.764	1.695	1.75
	11	0.83	0.817	0.855	0.834		0.916	0.899	0.888	0.901		1.127	1.088	1.109	1.108		1.325	1.312	1.35	1.329		1.609	1.644	1.648	1.63367
	12	0.878	0.89	0.814	0.860667		0.822	0.846	0.909	0.859		1.098	1.134	1.083	1.105		1.291	1.282	1.272	1.28167		1.628	1.654	1.733	1.67167
	13	0.74	0.789	0.814	0.781		0.874	0.887	0.879	0.88		1.165	1.09	1.071	1.10867		1.307	1.309	1.284	1.3		1.792	1.779	1.748	1.773
	14	0.773	0.853	0.815	0.813667		0.839	0.858	0.843	0.846667		1.22	1.201	1.172	1.19767		1.277	1.281	1.319	1.29233		1.698	1.75	1.678	1.70867
	15	0.846	0.767	0.787	0.8		0.88	0.872	0.915	0.889		1.147	1.101	1.07	1.106		1.325	1.29	1.348	1.321		1.695	1.678	1.725	1.69933
	16	0.804	0.819	0.801	0.808		0.909	0.927	0.919	0.918333		1.136	1.124	1.102	1.12067		1.332	1.315	1.209	1.28533		1.655	1.578	1.574	1.60233
	17	0.812	0.76	0.837	0.803		0.894	0.895	0.855	0.881333		1.154	1.195	1.21	1.18633		1.291	1.287	1.285	1.28767		1.582	1.658	1.572	1.604
	18	0.811	0.812	0.781	0.801333		0.901	0.902	0.898	0.900333		1.094	1.093	1.078	1.08833		1.235	1.251	1.225	1.237		1.888	1.892	1.768	1.84933
	19	0.834	0.791	0.765	0.796667		0.96	1.032	0.918	0.97		1.168	1.149	1.153	1.15667		1.331	1.242	1.294	1.289		1.715	1.674	1.712	1.70033
	20	0.845	0.787	0.817	0.816333		0.925	0.914	0.89	0.909667		1.172	1.154	1.113	1.14633		1.319	1.327	1.299	1.315		1.596	1.607	1.544	1.58233
	21	0.807	0.825	0.834	0.822		0.962	0.992	0.958	0.970667		1.221	1.192	1.126	1.17967		1.328	1.305	1.277	1.30333		1.62	1.566	1.59	1.592
	22	0.752	0.733	0.735	0.74		0.914	0.897	0.898	0.903		1.105	1.105	1.105	1.105		1.305	1.279	1.292	1.292		1.76	1.727	1.74	1.74233
	23	0.808	0.81	0.738	0.785333		1.026	0.973	0.907	0.968667		1.184	1.241	1.177	1.20067		1.216	1.243	1.219	1.226		1.745	1.706	1.613	1.688
	24	0.776	0.755	0.765	0.765333		0.955	0.984	0.935	0.958		1.133	1.118	1.15	1.13367		1.252	1.242	1.202	1.232		1.618	1.686	1.675	1.65967
	25	0.766	0.77	0.78	0.772		0.912	0.951	0.955	0.939333		1.213	1.198	1.161	1.19067		1.296	1.287	1.314	1.299		1.543	1.606	1.541	1.56333
	26	0.777	0.776	0.773	0.775333		0.929	0.884	0.91	0.907667		1.186	1.123	1.143	1.15067		1.321	1.3	1.316	1.31233		1.764	1.734	1.768	1.75533
	27	0.725	0.759	0.809	0.764333		0.859	0.87	0.852	0.860333		1.063	1.063	1.067	1.06433		1.289	1.284	1.267	1.28		1.672	1.731	1.582	1.66167
	28	0.783	0.751	0.719	0.751		0.938	0.909	0.905	0.917333		1.162	1.138	1.154	1.15133		1.31	1.288	1.295	1.29767		1.815	1.759	1.627	1.73367
	29	0.817	0.764	0.867	0.816		0.856	0.892	0.902	0.883333		1.096	1.118	1.118	1.11067		1.349	1.33	1.332	1.337		1.666	1.618	1.706	1.66333
	30	0.863	0.904	0.827	0.864667		0.939	0.942	0.927	0.936		1.034	1.066	1.053	1.051		1.221	1.213	1.219	1.21767		1.663	1.58	1.589	1.61067
FI474 LE flox	1	0.842	0.837	0.869	0.849333		0.99	0.981	0.968	0.979667		1.14	1.12	1.162	1.14067		1.309	1.322	1.308	1.313		1.632	1.639	1.59	1.62033
	2	0.851	0.907	0.84	0.866		0.957	0.957	0.917	0.943667		1.136	1.18	1.175	1.16367		1.256	1.286	1.383	1.30833		1.589	1.59	1.576	1.585
	3	0.913	0.893	0.84	0.882		0.97	0.937	0.929	0.945333		1.222	1.216	1.224	1.22067		1.428	1.32	1.217	1.32167		1.695	1.659	1.649	1.66767
	4	0.841	0.86	0.838	0.846333		0.923	0.924	0.924	0.923667		1.107	1.098	1.145	1.11667		1.205	1.216	1.25	1.22367		1.52	1.523	1.531	1.52467
	5	0.816	0.827	0.846	0.829667		0.828	0.918	0.903	0.883		1.021	1.031	1.08	1.044		1.281	1.237	1.278	1.26533		1.517	1.496	1.522	1.51167
	6	0.852	0.857	0.865	0.858		0.856	0.849	0.837	0.847333		1.1	1.092	1.147	1.113		1.256	1.248	1.293	1.26567		1.609	1.652	1.538	1.59967
	7	0.86	0.872	0.892	0.874667		0.936	0.957	0.946	0.946333		1.122	1.124	1.159	1.135		1.256	1.266	1.35	1.29067		1.609	1.652	1.538	1.59967
	8	0.848	0.901	0.882	0.877		0.852	0.849	0.849	0.85		1.121	1.114	1.137	1.124		1.304	1.306	1.313	1.30767		1.434	1.436	1.394	1.42133
	9	0.877	0.88	0.845	0.867333		0.865	0.839	0.83	0.844667		1.078	1.085	1.032	1.065		1.319	1.307	1.347	1.32433		1.564	1.535	1.59	1.563
	10	0.822	0.829	0.814	0.821667		1.036	1.008	0.96	1.00133		1.091	1.071	1.061	1.07433		1.3	1.301	1.285	1.29533		1.584	1.579	1.499	1.554
	11	0.857	0.872	0.888	0.872333		0.895	0.843	0.835	0.857667		1.098	1.122	1.136	1.11867		1.314	1.299	1.292	1.30167		1.7	1.69	1.633	1.67433
	12	0.855	0.867	0.861	0.861		0.911	0.919	0.954	0.928		1.182	1.13	1.126	1.146		1.21	1.197	1.184	1.197		1.548	1.563	1.516	1.54233
	13	0.814	0.8	0.836	0.816667		0.888	0.875	0.839	0.867333		1.039	1.022	1.148	1.06967		1.314	1.372	1.288	1.32467		1.464	1.464	1.477	1.46833
	14	0.767	0.795	0.797	0.786333		0.875	0.846	0.849	0.856667		1.135	1.122	1.044	1.10033		1.294	1.27	1.25	1.27133		1.414	1.433	1.397	1.41467
	15	0.906	0.898	0.891	0.898333		0.932	0.917	0.917	0.922		1.137	1.142	1.118	1.13233		1.196	1.198	1.269	1.221		1.628	1.629	1.741	1.666
	16	0.861	0.827	0.837	0.841667		0.976	0.977	0.986	0.979667		1.139	1.095	1.158	1.13067		1.268	1.283	1.247	1.266		1.518	1.511	1.429	1.486
	17	0.787	0.846	0.774	0.802333		0.931	0.945	0.914	0.93		1.09	1.086	1.137	1.10433		1.382	1.405	1.368	1.385		1.544	1.516	1.453	1.50433
	18	0.795	0.769	0.781	0.781667		1.019	1.009	0.972	1		1.107	1.094	0.955	1.052		1.204	1.178	1.198	1.19333		1.515	1.446	1.544	1.50167
	19	0.906	0.879	0.821	0.868667		0.877	0.902	0.862	0.880333		1.153	1.145	1.129	1.14233		1.22	1.207	1.191	1.206		1.561	1.509	1.5	1.52333
	20	0.881	0.886	0.862	0.876333		0.96	0.931	0.962	0.951		1.199	1.217	1.25	1.222		1.276	1.33	1.357	1.321		1.559	1.561	1.739	1.61967
	21	0.827	0.797	0.827	0.817		0.996	0.981	0.989	0.988667		1.044	1.035	1.023	1.034		1.264	1.258	1.297	1.273		1.518	1.49	1.474	1.494
	22	0.849	0.832	0.84	0.840333		0.926	0.93	0.918	0.924667		1.129	1.248	1.159	1.17867		1.235	1.236	1.234	1.235		1.512	1.47	1.45	1.47733
	23	0.8	0.834	0.814	0.816		0.962	0.986	0.984	0.977333		1.091	1.034	1.116	1.08033		1.298	1.327	1.306	1.31033		1.473	1.433	1.471	1.459
	24	0.795	0.787	0.787	0.789667		1.042	1.035	1.041	1.03933		1.087	1.12	1.116	1.10767		1.285	1.275	1.301	1.287		1.524	1.454	1.459	1.479
	25	0.849	0.876	0.844	0.856333		0.902	0.931	0.929	0.920667		1.139	1.113	1.119	1.12367		1.278	1.269	1.274	1.27367		1.574	1.499	1.494	1.52233
	26	0.769	0.764	0.785	0.772667		0.966	0.971	0.96	0.965667		1.086	1.019	1.031	1.04533		1.178	1.175	1.166	1.173		1.51	1.503	1.543	1.51867
	27	0.794	0.777	0.789	0.786667		0.997	0.987	0.974	0.986		1.115	1.126	1.254	1.165		1.147	1.118	1.208	1.15767		1.609	1.567	1.57	1.582
	28	0.795	0.777	0.77	0.780667		0.945	0.922	0.909	0.925333		1.177	1.146	1.176	1.16633		1.247	1.248	1.257	1.25067		1.481	1.489	1.515	1.495
	29	0.756	0.785	0.819	0.786667		1.049	0.992	0.958	0.999667		1.168	1.154	1.117	1.14633		1.288	1.265	1.306	1.28633		1.56	1.458	1.486	1.50133
	30	0.849	0.799	0.786	0.811333		0.953	0.934	0.972	0.953		1.11	1.096	1.087	1.09767		1.178	1.221	1.162	1.187		1.573	1.556	1.542	1.557
FI472 Flox	1	0.873	0.881	0.874	0.876		1.076	1.074	1.107	1.08567		1.254	1.224	1.231	1.23633		1.399	1.404	1.438	1.41367		1.541	1.585	1.577	1.56767
	2	0.824	0.84	0.858	0.840667		1.06	1.067	1.05	1.059		1.214	1.21	1.222	1.21533		1.335	1.37	1.366	1.357		1.567	1.568	1.544	1.55967
	3	0.881	0.874	0.824	0.859667		1.017	1.044	1.034	1.03167		1.139	1.086	1.153	1.126		1.354	1.338	1.427	1.373		1.525	1.582	1.595	1.56733
	4	0.84	0.858	0.771	0.823		1.035	0.932	0.981	0.982667		1.115	1.147	1.173	1.145		1.454	1.42	1.455	1.443		1.656	1.541	1.558	1.585
	5	0.712	0.724	0.812	0.749333		0.989	0.995	1.059	1.01433		1.208	1.188	1.157	1.18433		1.442	1.477	1.464	1.461		1.411	1.417	1.443	1.42367
	6	0.811	0.778	0.686	0.758333		0.999	0.94	1.015	0.984667		1.147	1.141	1.131	1.13967		1.34	1.392	1.305	1.34567		1.405	1.441	1.364	1.40333
	7	0.685	0.693	0.738	0.705333		0.992	0.993	0.896	0.960333		1.089	1.109	1.065	1.08767		1.259	1.335	1.318	1.304		1.578	1.586	1.606	1.59
	8	0.751	0.779	0.728	0.752667		0.933	0.927	0.932	0.930667		1.086	1.086	1.095	1.089		1.224	1.274	1.424	1.30733		1.523	1.521	1.564	1.536
	9	0.84	0.777	0.82	0.812333		0.896	0.906	0.868	0.89		1.083	1.079	1.064	1.07533		1.433	1.434	1.341	1.40267		1.554	1.541	1.554	1.54967
	10	0.713	0.799	0.807	0.773		0.948	0.906	0.907	0.920333		1.068	1.102	1.14	1.10333		1.388	1.362	1.392	1.38067		1.479	1.518	1.553	1.51667
	11	0.788	0.764	0.73	0.760667		0.96	0.929	0.933	0.940667		1.158	1.152	1.144	1.15133		1.392	1.418	1.423	1.411		1.549	1.634	1.522	1.56833
	12	0.762	0.723	0.733	0.739333		0.979	0.959	0.902	0.946667		1.136	1.111	1.12	1.12233		1.436	1.403	1.296	1.37833		1.536	1.538	1.518	1.53067
	13	0.812	0.766	0.778	0.785333		0.981	0.936	0.946	0.954333		1.179	1.154	1.14	1.15767		1.28	1.278	1.394	1.31733		1.525	1.443	1.457	1.475
	14	0.728	0.756	0.742	0.742		0.93	0.946	0.93	0.935333		1.05	1.021	1.05	1.04033		1.35	1.392	1.383	1.375		1.642	1.615	1.55	1.60233
	15	0.708	0.771	0.728	0.735667		0.988	0.949	0.944	0.960333		1.145	1.108	1.083	1.112		1.338	1.321	1.335	1.33133		1.522	1.466	1.474	1.48733
	16	0.767	0.754	0.826	0.782333		0.938	0.917	0.966	0.940333		1.151	1.173	1.16	1.16133		1.489	1.471	1.429	1.463		1.425	1.392	1.589	1.46867
	17	0.828	0.83	0.851	0.836333		0.962	0.945	0.943	0.95		1.055	1.083	1.076	1.07133		1.357	1.39	1.332	1.35967		1.586	1.551	1.531	1.556
	18	0.873	0.864	0.838	0.858333		0.938	0.915	0.958	0.937		1.077	1.084	1.102	1.08767		1.376	1.393	1.394	1.38767		1.558	1.563	1.515	1.54533
	19	0.787	0.8	0.816	0.801		0.928	0.92	0.907	0.918333		1.124	1.103	1.1	1.109		1.344	1.34	1.313	1.33233		1.588	1.574	1.559	1.57367
	20	0.774	0.781	0.766	0.773667		0.903	0.88	0.918	0.900333		1.094	1.108	1.099	1.10033		1.382	1.361	1.391	1.378		1.534	1.486	1.529	1.51633
	21	0.779	0.787	0.771	0.779		0.981	0.958	0.955	0.964667		1.094	1.133	1.133	1.12		1.388	1.396	1.396	1.39333		1.648	1.657	1.723	1.676
	22	0.748	0.707	0.754	0.736333		0.839	0.87	0.884	0.864333		1.143	1.099	1.104	1.11533		1.496	1.479	1.482	1.48567		1.511	1.531	1.518	1.52
	23	0.825	0.844	0.877	0.848667		0.954	0.954	0.884	0.930667		1.166	1.144	1.175	1.16167		1.392	1.325	1.326	1.34767		1.516	1.428	1.477	1.47367
	24	0.797	0.856	0.823	0.825333		0.89	0.91	0.877	0.892333		1.056	1.03	1.051	1.04567		1.351	1.372	1.319	1.34733		1.64	1.63	1.64	1.63667
	25	0.728	0.734	0.716	0.726		0.923	0.924	0.913	0.92		1.112	1.08	1.136	1.10933		1.33	1.294	1.314	1.31267		1.481	1.519	1.477	1.49233
	26	0.746	0.699	0.71	0.718333		0.939	0.939	0.919	0.932333		1.152	1.114	1.131	1.13233		1.376	1.411	1.323	1.37		1.653	1.609	1.566	1.60933
	27	0.718	0.719	0.754	0.730333		0.88	0.852	0.848	0.86		1.17	1.138	1.094	1.134		1.327	1.257	1.292	1.292		1.782	1.741	1.692	1.73833
	28	0.745	0.71	0.689	0.714667		0.853	0.856	0.876	0.861667		1.142	1.147	1.124	1.13767		1.399	1.371	1.342	1.37067		1.608	1.611	1.556	1.59167
	29	0.828	0.864	0.819	0.837		0.903	0.934	0.854	0.897		1.038	1.054	1.032	1.04133		1.291	1.3	1.338	1.30967		1.606	1.572	1.628	1.602
	30	0.73	0.761	0.768	0.753		0.856	0.857	0.859	0.857333		1.11	1.125	1.127	1.12067		1.38	1.359	1.325	1.35467		1.644	1.576	1.617	1.61233
					0.805448					0.928604					1.12009					1.3046					1.57737
