# Supplementary material for: Dysregulation of sonic hedgehog signaling causes hearing loss in ciliopathy mouse models
Source: eLife. 2020 Dec 31;9:e56551. doi: 10.7554/eLife.56551 (PMC7806262; doi:10.7554/eLife.56551)
Supplement: Figure 8—source data 1. [file elife-56551-fig8-data1.xlsx]

## Sheet: Cilk1_stereociliary length
		10-18%			Average			28-36%			Average			46-54%			Average			64%-72%			Average			82-90%			Average
FI446 cKO	1	0.668	0.615	0.612	0.631667		1	0.893	0.894	0.836	0.874333		1	0.997	0.988	0.964	0.983		1	1.29	1.249	1.25	1.263		1	2.064	1.944	1.812	1.94
	2	0.59	0.698	0.708	0.665333		2	1.092	1.069	1.027	1.06267		2	0.972	0.92	0.979	0.957		2	1.361	1.349	1.303	1.33767		2	1.567	1.555	1.668	1.59667
	3	0.551	0.535	0.473	0.519667		3	1.027	1.001	0.968	0.998667		3	0.972	1	1.006	0.992667		3	1.266	1.22	1.226	1.23733		3	1.567	1.633	1.584	1.59467
	4	0.651	0.709	0.582	0.647333		4	1.003	1.002	1.034	1.013		4	1.128	1.091	1.102	1.107		4	1.129	1.051	1.196	1.12533		4	2.021	1.846	1.964	1.94367
	5	0.642	0.673	0.684	0.666333		5	1.006	0.988	0.974	0.989333		5	0.951	0.971	0.971	0.964333		5	1.248	1.222	1.212	1.22733		5	1.772	1.775	1.503	1.68333
	6	0.576	0.566	0.538	0.56		6	0.84	0.827	0.802	0.823		6	1.125	1.1	1.1	1.10833		6	1.291	1.256	1.258	1.26833		6	1.54	1.549	1.641	1.57667
	7	0.536	0.486	0.563	0.528333		7	0.884	0.933	0.887	0.901333		7	1.015	0.989	1.034	1.01267		7	1.271	1.21	1.277	1.25267		7	1.839	1.796	1.853	1.82933
	8	0.587	0.56	0.579	0.575333		8	0.847	0.783	0.822	0.817333		8	1.042	1.042	0.955	1.013		8	1.085	1.143	1.067	1.09833		8	1.729	1.677	1.838	1.748
	9	0.674	0.664	0.684	0.674		9	0.86	0.818	0.923	0.867		9	1.093	1.114	1.106	1.10433		9	1.292	1.257	1.29	1.27967		9	1.9	1.629	2.119	1.88267
	10	0.74	0.709	0.706	0.718333		10	0.813	0.886	0.81	0.836333		10	1.005	0.981	1.017	1.001		10	1.322	1.322	1.269	1.30433		10	1.74	1.711	1.612	1.68767
	11	0.672	0.684	0.665	0.673667		11	0.84	0.875	0.837	0.850667		11	1.071	1.088	0.958	1.039		11	1.299	1.323	1.335	1.319		11	1.583	1.588	1.602	1.591
	12	0.757	0.776	0.682	0.738333		12	0.845	0.883	0.889	0.872333		12	0.96	0.976	1.017	0.984333		12	1.061	1.143	1.115	1.10633		12	1.395	1.46	1.677	1.51067
	13	0.614	0.637	0.629	0.626667		13	0.845	0.859	0.813	0.839		13	0.998	0.977	0.944	0.973		13	1.311	1.332	1.263	1.302		13	1.807	1.462	1.561	1.61
	14	0.774	0.711	0.702	0.729		14	0.915	0.92	0.819	0.884667		14	0.994	1.046	1.039	1.02633		14	1.35	1.268	1.344	1.32067		14	1.886	1.616	1.745	1.749
	15	0.721	0.671	0.703	0.698333		15	0.906	0.94	0.892	0.912667		15	1.163	1.122	1.122	1.13567		15	1.315	1.294	1.276	1.295		15	1.806	1.834	1.648	1.76267
	16	0.713	0.706	0.719	0.712667		16	0.922	0.881	0.808	0.870333		16	1.045	1.076	1.033	1.05133		16	1.176	1.284	1.268	1.24267		16	1.934	1.659	1.874	1.82233
	17	0.646	0.625	0.575	0.615333		17	0.891	0.782	0.827	0.833333		17	1.079	1.098	1.096	1.091		17	1.327	1.29	1.307	1.308		17	1.804	1.756	1.74	1.76667
	18	0.625	0.665	0.661	0.650333		18	0.818	0.81	0.791	0.806333		18	0.968	1	0.998	0.988667		18	1.23	1.215	1.304	1.24967		18	1.837	1.745	1.914	1.832
	19	0.538	0.547	0.512	0.532333		19	0.971	0.913	0.975	0.953		19	0.955	1.042	0.939	0.978667		19	1.256	1.311	1.237	1.268		19	1.656	1.579	1.714	1.64967
	20	0.592	0.59	0.559	0.580333		20	0.8	0.751	0.777	0.776		20	1.098	1.089	1.057	1.08133		20	1.187	1.226	1.253	1.222		20	1.748	1.751	1.67	1.723
	21	0.643	0.688	0.655	0.662		21	0.684	0.719	0.705	0.702667		21	1.065	1.087	1.056	1.06933		21	1.188	1.253	1.246	1.229		21	1.958	1.532	1.694	1.728
	22	0.63	0.638	0.619	0.629		22	0.909	0.9	0.885	0.898		22	1.001	1.017	1.053	1.02367		22	1.128	1.143	1.159	1.14333		22	1.685	1.633	1.756	1.69133
	23	0.62	0.609	0.552	0.593667		23	0.777	0.699	0.676	0.717333		23	1.008	0.981	0.909	0.966		23	1.298	1.24	1.222	1.25333		23	1.866	1.693	1.907	1.822
	24	0.475	0.636	0.67	0.593667		24	0.802	0.841	0.837	0.826667		24	1.097	1.065	1.04	1.06733		24	1.257	1.28	1.326	1.28767		24	1.69	1.629	1.474	1.59767
	25	0.64	0.73	0.647	0.672333		25	0.763	0.674	0.722	0.719667		25	0.978	1.023	1.006	1.00233		25	1.382	1.333	1.268	1.32767		25	1.941	2.028	1.823	1.93067
	26	0.7	0.64	0.647	0.662333		26	0.935	0.924	0.924	0.927667		26	1.09	1.116	1.142	1.116		26	1.217	1.195	1.218	1.21		26	1.502	1.931	1.758	1.73033
	27	0.667	0.725	0.698	0.696667		27	0.828	0.904	0.79	0.840667		27	1.065	1.055	1.055	1.05833		27	1.349	1.326	1.321	1.332		27	1.931	1.74	1.811	1.82733
	28	0.718	0.587	0.503	0.602667		28	0.814	0.871	0.781	0.822		28	1.067	1.09	1.071	1.076		28	0.986	1.071	1.084	1.047		28	1.513	1.317	1.375	1.40167
	29	0.609	0.598	0.613	0.606667		29	0.967	0.906	0.965	0.946		29	0.912	0.873	0.87	0.885		29	1.289	1.317	1.294	1.3		29	1.691	1.79	1.854	1.77833
	30	0.544	0.528	0.531	0.534333		30	0.957	0.848	0.917	0.907333		30	0.984	0.963	1.001	0.982667		30	1.126	1.107	1.174	1.13567		30	1.815	1.729	1.758	1.76733
FI352 cKO	1	0.677	0.675	0.644	0.665333		1	0.828	0.826	0.781	0.811667		1	1.114	1.136	1.132	1.12733		1	1.285	1.262	1.25	1.26567		1	1.407	1.482	1.543	1.47733
	2	0.655	0.593	0.688	0.645333		2	0.841	0.835	0.975	0.883667		2	1.059	1.053	1.047	1.053		2	1.182	1.139	1.175	1.16533		2	1.994	1.829	1.636	1.81967
	3	0.68	0.687	0.665	0.677333		3	0.864	0.857	0.871	0.864		3	0.923	1.042	1.011	0.992		3	1.247	1.298	1.251	1.26533		3	1.732	1.659	1.785	1.72533
	4	0.665	0.727	0.962	0.784667		4	0.828	0.824	0.854	0.835333		4	0.995	0.986	1.056	1.01233		4	1.357	1.324	1.352	1.34433		4	1.986	1.811	1.986	1.92767
	5	0.652	0.61	0.643	0.635		5	0.782	0.803	0.817	0.800667		5	1.098	1.141	0.985	1.07467		5	1.179	1.216	1.187	1.194		5	1.777	1.705	1.659	1.71367
	6	0.669	0.756	0.697	0.707333		6	0.721	0.806	0.75	0.759		6	1.235	1.14	1.187	1.18733		6	1.28	1.299	1.294	1.291		6	1.892	1.976	1.826	1.898
	7	0.53	0.721	0.608	0.619667		7	0.867	0.779	0.827	0.824333		7	1.174	1.133	1.26	1.189		7	1.228	1.068	1.232	1.176		7	1.568	1.55	1.518	1.54533
	8	0.645	0.655	0.676	0.658667		8	0.827	0.843	0.874	0.848		8	1.165	1.099	1.135	1.133		8	1.299	1.287	1.295	1.29367		8	1.91	1.873	1.843	1.87533
	9	0.754	0.583	0.703	0.68		9	0.854	0.9	0.914	0.889333		9	1.08	1.045	1.051	1.05867		9	1.304	1.303	1.26	1.289		9	1.383	1.458	1.772	1.53767
	10	0.69	0.671	0.711	0.690667		10	0.721	0.655	0.633	0.669667		10	1.043	1.028	0.998	1.023		10	1.249	1.206	1.271	1.242		10	1.741	1.887	1.362	1.66333
	11	0.675	0.629	0.599	0.634333		11	0.797	0.822	0.797	0.805333		11	0.994	1.016	1.039	1.01633		11	1.101	1.144	1.142	1.129		11	1.349	1.467	1.796	1.53733
	12	0.609	0.606	0.596	0.603667		12	0.825	0.869	0.854	0.849333		12	1.253	1.148	1.254	1.21833		12	1.228	1.256	1.355	1.27967		12	1.808	1.639	1.823	1.75667
	13	0.602	0.51	0.414	0.508667		13	0.812	0.839	0.808	0.819667		13	1.152	1.204	1.238	1.198		13	1.352	1.353	1.307	1.33733		13	1.872	1.755	1.635	1.754
	14	0.442	0.473	0.504	0.473		14	0.9	0.906	0.92	0.908667		14	1.197	1.215	1.213	1.20833		14	1.214	1.191	1.228	1.211		14	1.806	1.763	1.711	1.76
	15	0.516	0.454	0.509	0.493		15	0.826	0.805	0.799	0.81		15	1.139	1.236	1.166	1.18033		15	1.321	1.282	1.271	1.29133		15	1.702	1.638	1.526	1.622
	16	0.505	0.618	0.617	0.58		16	0.805	0.807	0.797	0.803		16	1.197	1.212	1.165	1.19133		16	1.154	1.128	1.001	1.09433		16	1.818	1.753	1.792	1.78767
	17	0.689	0.64	0.595	0.641333		17	0.996	1.003	0.983	0.994		17	1.223	1.252	1.174	1.21633		17	1.225	1.229	1.272	1.242		17	1.417	1.364	1.686	1.489
	18	0.581	0.742	0.731	0.684667		18	0.973	0.913	1.051	0.979		18	1.1	1.049	1.085	1.078		18	1.234	1.223	1.26	1.239		18	1.681	1.89	1.75	1.77367
	19	0.701	0.701	0.69	0.697333		19	0.828	0.899	0.817	0.848		19	1.007	0.929	0.921	0.952333		19	1.336	1.27	1.32	1.30867		19	1.79	1.779	1.786	1.785
	20	0.767	0.796	0.814	0.792333		20	0.799	0.769	0.828	0.798667		20	0.785	1.004	1.001	0.93		20	1.227	1.335	1.301	1.28767		20	1.771	1.756	1.775	1.76733
	21	0.786	0.663	0.653	0.700667		21	0.816	0.849	0.818	0.827667		21	0.791	1.019	1.112	0.974		21	1.474	1.423	1.34	1.41233		21	1.536	1.593	1.581	1.57
	22	0.638	0.667	0.698	0.667667		22	0.861	0.95	0.916	0.909		22	1.238	1.237	1.234	1.23633		22	1.434	1.366	1.38	1.39333		22	1.792	1.671	1.736	1.733
	23	0.672	0.609	0.579	0.62		23	0.914	0.953	0.935	0.934		23	1.197	1.225	1.171	1.19767		23	1.215	1.246	1.206	1.22233		23	1.878	1.862	1.844	1.86133
	24	0.632	0.747	0.675	0.684667		24	0.847	0.902	0.91	0.886333		24	1.214	1.156	1.136	1.16867		24	1.205	1.083	1.134	1.14067		24	1.949	1.979	2.004	1.97733
	25	0.709	0.785	0.725	0.739667		25	0.984	0.919	0.88	0.927667		25	1.14	1.086	1.113	1.113		25	1.213	1.279	1.284	1.25867		25	1.949	1.981	1.952	1.96067
	26	0.734	0.751	0.783	0.756		26	0.852	0.884	0.897	0.877667		26	0.911	0.864	1.084	0.953		26	1.179	1.082	1.044	1.10167		26	1.704	1.733	1.877	1.77133
	27	0.752	0.848	0.791	0.797		27	0.829	0.925	0.901	0.885		27	1.078	1.082	1.041	1.067		27	1.255	1.214	1.283	1.25067		27	1.832	1.754	1.767	1.78433
	28	0.789	0.799	0.716	0.768		28	1.006	0.999	0.937	0.980667		28	1.024	1.008	1.031	1.021		28	1.198	1.212	1.225	1.21167		28	1.891	1.89	1.818	1.86633
	29	0.778	0.693	0.731	0.734		29	0.862	0.846	0.838	0.848667		29	1.36	1.346	1.239	1.315		29	1.52	1.538	1.532	1.53		29	1.473	1.625	1.55	1.54933
	30	0.737	0.83	0.808	0.791667		30	0.768	0.865	0.831	0.821333		30	1.009	1.238	1.175	1.14067		30	1.508	1.503	1.652	1.55433		30	1.667	1.659	1.688	1.67133
FI427 cKO	1	0.513	0.458	0.535	0.502		1	0.87	0.821	0.808	0.833		1	1.141	1.054	1.113	1.10267		1	1.318	1.382	1.365	1.355		1	1.36	1.372	1.269	1.33367
	2	0.63	0.595	0.601	0.608667		2	0.917	0.893	0.892	0.900667		2	1.164	1.206	1.162	1.17733		2	1.685	1.7	1.655	1.68		2	1.596	1.674	1.682	1.65067
	3	0.521	0.516	0.527	0.521333		3	0.945	0.926	0.893	0.921333		3	1.097	1.149	1.173	1.13967		3	1.176	1.192	1.272	1.21333		3	1.333	1.254	1.231	1.27267
	4	0.602	0.614	0.611	0.609		4	0.921	0.804	0.823	0.849333		4	1.112	1.191	1.025	1.10933		4	1.283	1.281	1.282	1.282		4	1.486	1.418	1.361	1.42167
	5	0.653	0.599	0.591	0.614333		5	0.969	0.985	0.997	0.983667		5	1.253	1.254	1.247	1.25133		5	1.463	1.384	1.376	1.40767		5	1.367	1.465	1.504	1.44533
	6	0.552	0.546	0.558	0.552		6	0.943	0.971	0.982	0.965333		6	0.916	1.001	1.067	0.994667		6	1.557	1.486	1.476	1.50633		6	1.831	1.77	1.691	1.764
	7	0.479	0.556	0.61	0.548333		7	0.893	0.867	0.871	0.877		7	1.047	1.043	1.067	1.05233		7	1.324	1.36	1.308	1.33067		7	1.653	1.593	1.78	1.67533
	8	0.579	0.575	0.512	0.555333		8	0.993	0.96	1.003	0.985333		8	1.226	1.264	1.247	1.24567		8	1.496	1.499	1.535	1.51		8	1.552	1.442	1.607	1.53367
	9	0.596	0.585	0.605	0.595333		9	1.012	0.988	0.774	0.924667		9	1.13	1.159	1.142	1.14367		9	1.319	1.322	1.26	1.30033		9	1.515	1.455	1.495	1.48833
	10	0.563	0.52	0.728	0.603667		10	0.958	0.898	0.887	0.914333		10	1.03	1.144	1.143	1.10567		10	1.463	1.494	1.45	1.469		10	1.542	1.752	1.676	1.65667
	11	0.633	0.621	0.714	0.656		11	0.801	0.797	0.772	0.79		11	1.156	1.115	1.102	1.12433		11	1.463	1.532	1.507	1.50067		11	1.76	1.649	1.734	1.71433
	12	0.659	0.599	0.544	0.600667		12	0.828	0.828	0.847	0.834333		12	1.224	1.211	1.217	1.21733		12	1.569	1.615	1.625	1.603		12	1.847	1.797	1.737	1.79367
	13	0.54	0.55	0.75	0.613333		13	0.95	0.902	0.92	0.924		13	1.18	1.05	1.118	1.116		13	1.387	1.386	1.394	1.389		13	1.278	1.37	1.387	1.345
	14	0.675	0.719	0.611	0.668333		14	0.97	0.861	0.844	0.891667		14	1.065	1.109	0.988	1.054		14	1.426	1.414	1.439	1.42633		14	1.32	1.333	1.297	1.31667
	15	0.632	0.594	0.625	0.617		15	0.95	0.941	0.977	0.956		15	1.08	1.072	1.067	1.073		15	1.421	1.369	1.327	1.37233		15	1.659	1.562	1.649	1.62333
	16	0.616	0.682	0.569	0.622333		16	0.867	0.938	0.94	0.915		16	1.11	1.028	1.006	1.048		16	1.327	1.212	1.297	1.27867		16	1.665	1.735	1.691	1.697
	17	0.524	0.556	0.695	0.591667		17	0.956	0.91	0.894	0.92		17	0.907	0.944	0.928	0.926333		17	1.121	1.206	1.125	1.15067		17	1.688	1.643	1.595	1.642
	18	0.66	0.682	0.777	0.706333		18	0.907	0.931	0.88	0.906		18	1.067	1.11	1.112	1.09633		18	1.349	1.349	1.337	1.345		18	1.682	1.669	1.614	1.655
	19	0.77	0.769	0.715	0.751333		19	1.125	1.133	0.94	1.066		19	1.13	1.207	1.128	1.155		19	1.601	1.432	1.525	1.51933		19	1.375	1.291	1.383	1.34967
	20	0.738	0.667	0.706	0.703667		20	0.773	0.76	0.929	0.820667		20	1.071	1.189	1.106	1.122		20	1.163	1.197	1.207	1.189		20	1.591	1.602	1.53	1.57433
	21	0.744	0.734	0.668	0.715333		21	0.925	0.917	0.846	0.896		21	0.958	0.967	1.004	0.976333		21	1.508	1.481	1.48	1.48967		21	1.767	1.801	1.777	1.78167
	22	0.683	0.655	0.732	0.69		22	0.84	0.841	0.797	0.826		22	1.15	1.117	1.094	1.12033		22	1.418	1.321	1.343	1.36067		22	1.598	1.55	1.594	1.58067
	23	0.676	0.683	0.653	0.670667		23	0.842	0.836	0.842	0.84		23	0.788	0.818	0.826	0.810667		23	1.343	1.394	1.392	1.37633		23	1.762	1.69	1.776	1.74267
	24	0.6	0.65	0.821	0.690333		24	0.875	0.939	0.913	0.909		24	1.045	1.068	1.079	1.064		24	1.228	1.15	1.238	1.20533		24	1.488	1.543	1.497	1.50933
	25	0.72	0.788	0.682	0.73		25	0.853	0.889	0.884	0.875333		25	0.984	1.044	1.14	1.056		25	1.473	1.472	1.432	1.459		25	1.694	1.691	1.694	1.693
	26	0.796	0.667	0.688	0.717		26	0.962	0.904	0.944	0.936667		26	1.041	1.122	1.108	1.09033		26	1.395	1.331	1.384	1.37		26	1.662	1.648	1.567	1.62567
	27	0.728	0.731	0.782	0.747		27	0.979	1.01	1.023	1.004		27	1.069	1.031	1.082	1.06067		27	1.286	1.366	1.36	1.33733		27	1.155	1.157	1.096	1.136
	28	0.673	0.858	0.67	0.733667		28	0.883	0.839	0.857	0.859667		28	1.063	1.107	1.136	1.102		28	1.426	1.505	1.43	1.45367		28	1.236	1.206	1.25	1.23067
	29	0.695	0.596	0.58	0.623667		29	0.939	1.028	1.031	0.999333		29	0.982	0.992	0.989	0.987667		29	1.609	1.567	1.601	1.59233		29	1.55	1.489	1.411	1.48333
	30	0.617	0.629	0.754	0.666667		30	0.882	0.896	1.022	0.933333		30	1.12	1.129	1.147	1.132		30	1.429	1.442	1.449	1.44		30	1.653	1.712	1.692	1.68567
					0.64837						0.878293						1.07467						1.29811						1.65223

## Sheet: Control_stereociliary length
		10-18%			Average			28-36%			Average			46-54%			Average			64%-72%			Average			82-90%			Average
FI474 flox	1	0.815	0.84	0.857	0.837333		1	1.063	0.979	1.027	1.023		1	1.238	1.215	1.194	1.21567		1	1.539	1.516	1.516	1.52367		1	1.916	1.861	1.995	1.924
	2	0.764	0.766	0.786	0.772		2	0.926	0.929	0.937	0.930667		2	1.192	1.19	1.169	1.18367		2	1.405	1.441	1.391	1.41233		2	1.667	1.731	1.669	1.689
	3	0.818	0.831	0.827	0.825333		3	0.978	0.92	0.95	0.949333		3	1.227	1.138	1.166	1.177		3	1.529	1.518	1.507	1.518		3	1.843	1.87	1.833	1.84867
	4	0.833	0.863	0.855	0.850333		4	1.026	1.026	1.01	1.02067		4	1.319	1.233	1.233	1.26167		4	1.45	1.479	1.419	1.44933		4	1.873	1.818	1.818	1.83633
	5	0.881	0.879	0.885	0.881667		5	0.958	0.956	0.978	0.964		5	1.171	1.247	1.194	1.204		5	1.516	1.508	1.467	1.497		5	1.716	1.729	1.699	1.71467
	6	0.817	0.806	0.812	0.811667		6	1.056	1.007	1.036	1.033		6	1.165	1.196	1.205	1.18867		6	1.5	1.503	1.478	1.49367		6	2.046	1.851	1.93	1.94233
	7	0.807	0.782	0.79	0.793		7	0.993	0.993	1.02	1.002		7	1.303	1.302	1.349	1.318		7	1.537	1.53	1.524	1.53033		7	1.761	1.756	1.714	1.74367
	8	0.877	0.878	0.84	0.865		8	1.072	1.073	1.067	1.07067		8	1.217	1.288	1.301	1.26867		8	1.559	1.56	1.547	1.55533		8	1.688	1.775	1.675	1.71267
	9	0.86	0.876	0.87	0.868667		9	0.933	0.955	0.967	0.951667		9	1.282	1.238	1.217	1.24567		9	1.478	1.479	1.506	1.48767		9	1.76	1.692	1.662	1.70467
	10	0.805	0.826	0.829	0.82		10	0.956	0.977	1.001	0.978		10	1.157	1.201	1.186	1.18133		10	1.419	1.488	1.43	1.44567		10	1.855	1.939	1.966	1.92
	11	0.801	0.776	0.783	0.786667		11	1.004	1.01	0.99	1.00133		11	1.14	1.14	1.168	1.14933		11	1.468	1.484	1.425	1.459		11	1.984	1.872	1.924	1.92667
	12	0.779	0.815	0.836	0.81		12	0.933	0.949	0.914	0.932		12	1.211	1.163	1.14	1.17133		12	1.472	1.445	1.446	1.45433		12	1.748	1.777	1.67	1.73167
	13	0.861	0.876	0.857	0.864667		13	1.013	1.03	1.04	1.02767		13	1.233	1.259	1.266	1.25267		13	1.538	1.488	1.512	1.51267		13	1.918	2.041	1.953	1.97067
	14	0.803	0.826	0.822	0.817		14	0.961	0.978	0.988	0.975667		14	1.187	1.247	1.257	1.23033		14	1.526	1.52	1.559	1.535		14	1.774	1.752	1.698	1.74133
	15	0.823	0.802	0.805	0.81		15	0.989	1.01	0.968	0.989		15	1.238	1.221	1.128	1.19567		15	1.491	1.467	1.467	1.475		15	1.959	1.903	1.92	1.92733
	16	0.89	0.89	0.925	0.901667		16	1.002	1.037	1.061	1.03333		16	1.21	1.233	1.21	1.21767		16	1.435	1.406	1.438	1.42633		16	1.893	1.849	1.811	1.851
	17	0.878	0.898	0.902	0.892667		17	1.022	1.013	1.027	1.02067		17	1.233	1.284	1.243	1.25333		17	1.406	1.399	1.469	1.42467		17	1.844	1.866	1.794	1.83467
	18	0.91	0.878	0.89	0.892667		18	1.016	1.005	1.017	1.01267		18	1.282	1.236	1.201	1.23967		18	1.458	1.428	1.422	1.436		18	1.935	1.886	1.849	1.89
	19	0.786	0.786	0.78	0.784		19	1.004	1.01	0.999	1.00433		19	1.223	1.256	1.235	1.238		19	1.428	1.419	1.456	1.43433		19	1.987	1.969	1.917	1.95767
	20	0.817	0.825	0.821	0.821		20	1.071	1.002	0.99	1.021		20	1.242	1.151	1.204	1.199		20	1.551	1.57	1.56	1.56033		20	1.837	1.881	1.891	1.86967
	21	0.86	0.851	0.832	0.847667		21	0.942	0.987	0.99	0.973		21	1.25	1.175	1.237	1.22067		21	1.457	1.516	1.474	1.48233		21	1.897	1.897	1.892	1.89533
	22	0.825	0.803	0.825	0.817667		22	1.055	1.083	1.059	1.06567		22	1.235	1.19	1.14	1.18833		22	1.606	1.583	1.579	1.58933		22	1.715	1.642	1.641	1.666
	23	0.852	0.861	0.842	0.851667		23	1.106	1.106	1.052	1.088		23	1.19	1.302	1.303	1.265		23	1.466	1.396	1.4	1.42067		23	1.71	1.85	1.72	1.76
	24	0.793	0.786	0.771	0.783333		24	1.165	1.149	1.176	1.16333		24	1.336	1.21	1.25	1.26533		24	1.51	1.487	1.523	1.50667		24	1.908	1.962	1.913	1.92767
	25	0.737	0.742	0.742	0.740333		25	1.097	1.084	1.106	1.09567		25	1.204	1.118	1.095	1.139		25	1.47	1.472	1.487	1.47633		25	1.981	2.039	2.104	2.04133
	26	0.778	0.757	0.738	0.757667		26	1.022	1.033	1	1.01833		26	1.12	1.259	1.213	1.19733		26	1.474	1.543	1.538	1.51833		26	1.93	1.934	2.02	1.96133
	27	0.78	0.784	0.821	0.795		27	1.053	1.074	1.051	1.05933		27	1.287	1.186	1.222	1.23167		27	1.512	1.493	1.558	1.521		27	2.149	2.079	2.099	2.109
	28	0.778	0.775	0.772	0.775		28	1.024	1.047	1.048	1.03967		28	1.192	1.225	1.253	1.22333		28	1.434	1.473	1.396	1.43433		28	2.18	2.209	2.263	2.21733
	29	0.745	0.738	0.732	0.738333		29	1.03	0.937	1.007	0.991333		29	1.233	1.24	1.241	1.238		29	1.464	1.413	1.421	1.43267		29	1.948	1.875	1.922	1.915
	30	0.816	0.781	0.793	0.796667		30	1.007	1.007	1.01	1.008		30	1.214	1.218	1.283	1.23833		30	1.632	1.657	1.641	1.64333		30	1.825	1.862	1.849	1.84533
FI473 flox	1	0.922	0.892	0.902	0.905333		1	1.044	1.045	1.024	1.03767		1	1.143	1.187	1.21	1.18		1	1.4	1.469	1.407	1.42533		1	1.803	1.723	2.044	1.85667
	2	0.81	0.835	0.798	0.814333		2	1.036	1.073	1.049	1.05267		2	1.235	1.21	1.233	1.226		2	1.443	1.396	1.363	1.40067		2	1.839	1.978	1.911	1.90933
	3	0.845	0.854	0.888	0.862333		3	0.964	1.027	1.024	1.005		3	1.159	1.132	1.148	1.14633		3	1.369	1.375	1.365	1.36967		3	1.979	1.792	1.84	1.87033
	4	0.783	0.735	0.69	0.736		4	1.09	1.132	1.095	1.10567		4	1.244	1.237	1.197	1.226		4	1.344	1.407	1.386	1.379		4	1.749	1.715	1.722	1.72867
	5	0.794	0.824	0.825	0.814333		5	1.044	1.032	1.016	1.03067		5	1.152	1.158	1.179	1.163		5	1.283	1.296	1.324	1.301		5	1.884	1.808	1.823	1.83833
	6	0.724	0.754	0.803	0.760333		6	1.077	1.1	1.027	1.068		6	1.189	1.17	1.157	1.172		6	1.321	1.248	1.315	1.29467		6	1.661	1.739	1.674	1.69133
	7	0.823	0.776	0.813	0.804		7	1.024	1.047	0.978	1.01633		7	1.233	1.233	1.241	1.23567		7	1.32	1.352	1.335	1.33567		7	1.821	1.647	1.62	1.696
	8	0.788	0.806	0.748	0.780667		8	1.022	1.033	1.049	1.03467		8	1.186	1.169	1.22	1.19167		8	1.275	1.316	1.312	1.301		8	1.783	1.688	1.715	1.72867
	9	0.853	0.819	0.721	0.797667		9	1.123	1.119	1.133	1.125		9	1.111	1.149	1.157	1.139		9	1.238	1.27	1.315	1.27433		9	1.839	1.88	1.839	1.85267
	10	0.853	0.78	0.843	0.825333		10	1.047	1.047	1	1.03133		10	1.149	1.209	1.207	1.18833		10	1.368	1.394	1.399	1.387		10	2.33	2.253	2.247	2.27667
	11	0.768	0.721	0.791	0.76		11	1.01	1.03	1.039	1.02633		11	1.156	1.118	1.17	1.148		11	1.573	1.45	1.508	1.51033		11	2.007	1.857	1.889	1.91767
	12	0.955	0.865	0.895	0.905		12	1.061	1.074	1.075	1.07		12	1.167	1.14	1.201	1.16933		12	1.542	1.515	1.471	1.50933		12	1.891	1.862	1.862	1.87167
	13	0.865	0.899	0.815	0.859667		13	1.049	1.048	1	1.03233		13	1.196	1.17	1.227	1.19767		13	1.441	1.401	1.388	1.41		13	1.847	1.874	1.89	1.87033
	14	0.839	0.86	0.853	0.850667		14	1.047	1.07	1.074	1.06367		14	1.167	1.186	1.157	1.17		14	1.493	1.474	1.42	1.46233		14	1.835	1.719	1.738	1.764
	15	0.838	0.822	0.895	0.851667		15	1.071	1.116	1.047	1.078		15	1.257	1.21	1.233	1.23333		15	1.541	1.597	1.524	1.554		15	1.771	1.811	1.922	1.83467
	16	0.839	0.838	0.839	0.838667		16	1.048	1.064	1.047	1.053		16	1.201	1.209	1.163	1.191		16	1.508	1.512	1.489	1.503		16	1.765	1.86	1.667	1.764
	17	0.746	0.837	0.769	0.784		17	1.093	1.07	0.977	1.04667		17	1.143	1.201	1.147	1.16367		17	1.433	1.416	1.412	1.42033		17	1.857	1.866	1.8	1.841
	18	0.79	0.814	0.84	0.814667		18	1	1.047	0.929	0.992		18	1.149	1.209	1.193	1.18367		18	1.498	1.469	1.446	1.471		18	1.788	1.842	1.79	1.80667
	19	0.907	0.907	0.814	0.876		19	0.974	0.977	1.053	1.00133		19	1.093	1.12	1.152	1.12167		19	1.534	1.506	1.557	1.53233		19	2.063	2.003	1.822	1.96267
	20	0.796	0.768	0.768	0.777333		20	1.011	1.015	1.023	1.01633		20	1.168	1.168	1.149	1.16167		20	1.583	1.568	1.541	1.564		20	1.721	1.658	1.729	1.70267
	21	0.835	0.796	0.902	0.844333		21	1.024	1.024	0.961	1.003		21	1.163	1.177	1.157	1.16567		21	1.382	1.359	1.35	1.36367		21	1.718	1.766	1.669	1.71767
	22	0.73	0.721	0.74	0.730333		22	0.908	0.971	1.004	0.961		22	1.179	1.227	1.213	1.20633		22	1.578	1.538	1.645	1.587		22	1.982	1.976	1.948	1.96867
	23	0.933	0.78	0.822	0.845		23	0.978	1.007	1.083	1.02267		23	1.282	1.256	1.238	1.25867		23	1.65	1.715	1.623	1.66267		23	2.048	2.099	2.126	2.091
	24	0.862	0.812	0.824	0.832667		24	1.03	1	1.004	1.01133		24	1.19	1.211	1.257	1.21933		24	1.662	1.657	1.633	1.65067		24	1.926	1.942	2.03	1.966
	25	0.787	0.757	0.794	0.779333		25	0.993	1.01	0.987	0.996667		25	1.164	1.145	1.155	1.15467		25	1.537	1.508	1.476	1.507		25	1.806	1.739	1.877	1.80733
	26	0.814	0.787	0.817	0.806		26	1.024	1.024	1.004	1.01733		26	1.214	1.228	1.14	1.194		26	1.423	1.495	1.416	1.44467		26	2.107	2.04	2.128	2.09167
	27	0.767	0.792	0.791	0.783333		27	1.017	0.99	0.976	0.994333		27	1.215	1.201	1.224	1.21333		27	1.44	1.373	1.35	1.38767		27	2.111	2.123	2.061	2.09833
	28	0.785	0.803	0.799	0.795667		28	1.117	1.094	1.094	1.10167		28	1.143	1.19	1.142	1.15833		28	1.312	1.282	1.34	1.31133		28	2.256	2.251	2.235	2.24733
	29	0.799	0.771	0.767	0.779		29	1.093	1.07	1.048	1.07033		29	1.284	1.266	1.264	1.27133		29	1.479	1.476	1.478	1.47767		29	2.208	2.268	2.157	2.211
	30	0.823	0.819	0.79	0.810667		30	1.021	1.036	1.042	1.033		30	1.14	1.186	1.095	1.14033		30	1.579	1.535	1.462	1.52533		30	2.176	2.12	2.059	2.11833
	1	0.933	0.928	0.91	0.923667		1	1.076	1.024	1.024	1.04133		1	1.247	1.243	1.247	1.24567		1	1.536	1.491	1.472	1.49967		1	1.908	1.95	1.903	1.92033
	2	0.933	0.928	0.91	0.923667		2	1.089	1.049	1.051	1.063		2	1.093	1.125	1.125	1.11433		2	1.468	1.472	1.514	1.48467		2	1.843	1.786	1.76	1.79633
	3	0.864	0.859	0.845	0.856		3	1.01	0.99	1.082	1.02733		3	1.213	1.209	1.233	1.21833		3	1.396	1.374	1.351	1.37367		3	1.895	1.77	1.718	1.79433
	4	0.816	0.811	0.867	0.831333		4	1.052	1.045	1.075	1.05733		4	1.301	1.362	1.21	1.291		4	1.582	1.564	1.539	1.56167		4	1.995	1.797	1.725	1.839
	5	0.8	0.839	0.738	0.792333		5	1.139	1.118	1.081	1.11267		5	1.179	1.209	1.217	1.20167		5	1.396	1.413	1.371	1.39333		5	1.787	1.75	1.931	1.82267
	6	0.758	0.772	0.734	0.754667		6	0.888	0.889	0.872	0.883		6	1.162	1.154	1.169	1.16167		6	1.579	1.537	1.52	1.54533		6	1.863	1.94	1.717	1.84
	7	0.756	0.772	0.832	0.786667		7	1.017	0.979	0.937	0.977667		7	1.243	1.248	1.243	1.24467		7	1.563	1.589	1.551	1.56767		7	1.688	1.702	1.756	1.71533
	8	0.806	0.804	0.832	0.814		8	0.981	1.014	1.014	1.003		8	1.264	1.16	1.197	1.207		8	1.446	1.449	1.425	1.44		8	1.779	1.867	1.84	1.82867
	9	0.859	0.82	0.859	0.846		9	1	1.004	1.019	1.00767		9	1.226	1.231	1.191	1.216		9	1.428	1.428	1.376	1.41067		9	1.857	1.722	1.821	1.8
	10	0.86	0.864	0.975	0.899667		10	0.859	0.833	0.882	0.858		10	1.336	1.255	1.331	1.30733		10	1.467	1.435	1.508	1.47		10	1.79	1.715	1.741	1.74867
	11	0.913	0.943	0.988	0.948		11	0.82	0.882	0.907	0.869667		11	1.168	1.118	1.221	1.169		11	1.727	1.512	1.748	1.66233		11	1.852	1.702	1.673	1.74233
	12	0.965	0.959	0.947	0.957		12	0.836	0.885	0.869	0.863333		12	1.155	1.276	1.218	1.21633		12	1.547	1.557	1.486	1.53		12	1.858	1.787	1.741	1.79533
FI472 flox	13	0.776	0.737	0.765	0.759333		13	0.956	0.946	0.92	0.940667		13	1.154	1.202	1.236	1.19733		13	1.476	1.463	1.494	1.47767		13	1.959	1.867	1.895	1.907
	14	0.759	0.772	0.764	0.765		14	1.005	1.008	0.969	0.994		14	1.203	1.199	1.163	1.18833		14	1.45	1.463	1.532	1.48167		14	1.776	1.829	1.815	1.80667
	15	0.888	0.852	0.824	0.854667		15	0.961	0.958	0.956	0.958333		15	1.233	1.24	1.241	1.238		15	1.507	1.569	1.615	1.56367		15	1.718	1.753	1.683	1.718
	16	0.81	0.809	0.791	0.803333		16	1.07	1.047	1.026	1.04767		16	1.214	1.218	1.283	1.23833		16	1.625	1.672	1.54	1.61233		16	1.695	1.719	1.76	1.72467
	17	0.72	0.708	0.718	0.715333		17	1.03	1.071	1.07	1.057		17	1.247	1.243	1.247	1.24567		17	1.693	1.621	1.615	1.643		17	1.779	1.721	1.66	1.72
	18	0.817	0.831	0.758	0.802		18	1.013	1.007	1.001	1.007		18	1.093	1.125	1.125	1.11433		18	1.446	1.426	1.414	1.42867		18	1.816	1.791	1.812	1.80633
	19	0.786	0.763	0.755	0.768		19	1.024	1.026	1.047	1.03233		19	1.213	1.209	1.233	1.21833		19	1.439	1.387	1.386	1.404		19	1.87	1.956	1.906	1.91067
	20	0.76	0.827	0.807	0.798		20	0.931	0.987	0.914	0.944		20	1.289	1.24	1.255	1.26133		20	1.663	1.603	1.618	1.628		20	1.885	1.965	1.87	1.90667
	21	0.795	0.785	0.796	0.792		21	0.954	1	0.977	0.977		21	1.28	1.213	1.201	1.23133		21	1.394	1.338	1.398	1.37667		21	1.95	1.905	1.92	1.925
	22	0.853	0.892	0.876	0.873667		22	1.047	1.097	1.079	1.07433		22	1.3	1.25	1.267	1.27233		22	1.478	1.457	1.543	1.49267		22	2.011	1.903	1.893	1.93567
	23	0.727	0.726	0.724	0.725667		23	1.132	1.071	1.056	1.08633		23	1.209	1.207	1.216	1.21067		23	1.631	1.544	1.463	1.546		23	1.935	1.927	1.84	1.90067
	24	0.816	0.794	0.772	0.794		24	1.036	1.059	1.067	1.054		24	1.171	1.128	1.218	1.17233		24	1.478	1.465	1.41	1.451		24	1.759	1.688	1.667	1.70467
	25	0.819	0.767	0.785	0.790333		25	1.007	0.987	1	0.998		25	1.145	1.083	1.136	1.12133		25	1.369	1.388	1.379	1.37867		25	1.737	1.901	1.632	1.75667
	26	0.796	0.771	0.746	0.771		26	1.027	1.027	1.073	1.04233		26	1.14	1.14	1.127	1.13567		26	1.46	1.45	1.402	1.43733		26	1.717	1.748	1.775	1.74667
	27	0.776	0.751	0.762	0.763		27	1.056	1.079	1.051	1.062		27	1.25	1.228	1.201	1.22633		27	1.388	1.41	1.342	1.38		27	1.921	1.896	2.004	1.94033
	28	0.698	0.768	0.773	0.746333		28	0.975	1.049	1.04	1.02133		28	1.162	1.136	1.124	1.14067		28	1.35	1.332	1.342	1.34133		28	2.006	1.816	1.849	1.89033
	29	0.809	0.804	0.755	0.789333		29	0.93	0.931	0.978	0.946333		29	1.284	1.235	1.259	1.25933		29	1.342	1.342	1.383	1.35567		29	1.747	1.772	1.718	1.74567
	30	0.778	0.775	0.812	0.788333		30	0.935	0.955	0.908	0.932667		30	1.178	1.287	1.136	1.20033		30	1.441	1.477	1.438	1.452		30	1.724	1.864	1.817	1.80167
					0.816281						1.01645						1.20504						1.47075						1.86296

## Sheet: Combined
	Stereocilia length graph																																													191110 count = FI472 flox
10-18%	Control	0.837333	0.772	0.825333	0.850333	0.881667	0.811667	0.793	0.865	0.868667	0.82	0.786667	0.81	0.864667	0.817	0.81	0.901667	0.892667	0.892667	0.784	0.821	0.847667	0.817667	0.851667	0.783333	0.740333	0.757667	0.795	0.775	0.738333	0.796667	0.905333	0.814333	0.862333	0.736	0.814333	0.760333	0.804	0.780667	0.797667	0.825333	0.76	0.905	0.859667	0.850667	0.851667	0.838667	0.784	0.814667
	Cilk1 cKO	0.631667	0.665333	0.519667	0.647333	0.666333	0.56	0.528333	0.575333	0.674	0.718333	0.673667	0.738333	0.626667	0.729	0.698333	0.712667	0.615333	0.650333	0.532333	0.580333	0.662	0.629	0.593667	0.593667	0.672333	0.662333	0.696667	0.602667	0.606667	0.534333	0.665333	0.645333	0.677333	0.784667	0.635	0.707333	0.619667	0.658667	0.68	0.690667	0.634333	0.603667	0.508667	0.473	0.493	0.58	0.641333	0.684667
28-36%	Control	1.023	0.930667	0.949333	1.02067	0.964	1.033	1.002	1.07067	0.951667	0.978	1.00133	0.932	1.02767	0.975667	0.989	1.03333	1.02067	1.01267	1.00433	1.021	0.973	1.06567	1.088	1.16333	1.09567	1.01833	1.05933	1.03967	0.991333	1.008	1.03767	1.05267	1.005	1.10567	1.03067	1.068	1.01633	1.03467	1.125	1.03133	1.02633	1.07	1.03233	1.06367	1.078	1.053	1.04667	0.992
	Cilk1 cKO	0.874333	1.06267	0.998667	1.013	0.989333	0.823	0.901333	0.817333	0.867	0.836333	0.850667	0.872333	0.839	0.884667	0.912667	0.870333	0.833333	0.806333	0.953	0.776	0.702667	0.898	0.717333	0.826667	0.719667	0.927667	0.840667	0.822	0.946	0.907333	0.811667	0.883667	0.864	0.835333	0.800667	0.759	0.824333	0.848	0.889333	0.669667	0.805333	0.849333	0.819667	0.908667	0.81	0.803	0.994	0.979
46-54%	Control	1.21567	1.18367	1.177	1.26167	1.204	1.18867	1.318	1.26867	1.24567	1.18133	1.14933	1.17133	1.25267	1.23033	1.19567	1.21767	1.25333	1.23967	1.238	1.199	1.22067	1.18833	1.265	1.26533	1.139	1.19733	1.23167	1.22333	1.238	1.23833	1.18	1.226	1.14633	1.226	1.163	1.172	1.23567	1.19167	1.139	1.18833	1.148	1.16933	1.19767	1.17	1.23333	1.191	1.16367	1.18367
	Cilk1 cKO	0.983	0.957	0.992667	1.107	0.964333	1.10833	1.01267	1.013	1.10433	1.001	1.039	0.984333	0.973	1.02633	1.13567	1.05133	1.091	0.988667	0.978667	1.08133	1.06933	1.02367	0.966	1.06733	1.00233	1.116	1.05833	1.076	0.885	0.982667	1.12733	1.053	0.992	1.01233	1.07467	1.18733	1.189	1.133	1.05867	1.023	1.01633	1.21833	1.198	1.20833	1.18033	1.19133	1.21633	1.078
64-72%	Control	1.52367	1.41233	1.518	1.44933	1.497	1.49367	1.53033	1.55533	1.48767	1.44567	1.459	1.45433	1.51267	1.535	1.475	1.42633	1.42467	1.436	1.43433	1.56033	1.48233	1.58933	1.42067	1.50667	1.47633	1.51833	1.521	1.43433	1.43267	1.64333	1.42533	1.40067	1.36967	1.379	1.301	1.29467	1.33567	1.301	1.27433	1.387	1.51033	1.50933	1.41	1.46233	1.554	1.503	1.42033	1.471
	Cilk1 cKO	1.263	1.33767	1.23733	1.12533	1.22733	1.26833	1.25267	1.09833	1.27967	1.30433	1.319	1.10633	1.302	1.32067	1.295	1.24267	1.308	1.24967	1.268	1.222	1.229	1.14333	1.25333	1.28767	1.32767	1.21	1.332	1.047	1.3	1.13567	1.26567	1.16533	1.26533	1.34433	1.194	1.291	1.176	1.29367	1.289	1.242	1.129	1.27967	1.33733	1.211	1.29133	1.09433	1.242	1.239
82-90%	Control	1.924	1.689	1.84867	1.83633	1.71467	1.94233	1.74367	1.71267	1.70467	1.92	1.92667	1.73167	1.97067	1.74133	1.92733	1.851	1.83467	1.89	1.95767	1.86967	1.89533	1.666	1.76	1.92767	2.04133	1.96133	2.109	2.21733	1.915	1.84533	1.85667	1.90933	1.87033	1.72867	1.83833	1.69133	1.696	1.72867	1.85267	2.27667	1.91767	1.87167	1.87033	1.764	1.83467	1.764	1.841	1.80667
	Cilk1 cKO	1.94	1.59667	1.59467	1.94367	1.68333	1.57667	1.82933	1.748	1.88267	1.68767	1.591	1.51067	1.61	1.749	1.76267	1.82233	1.76667	1.832	1.64967	1.723	1.728	1.69133	1.822	1.59767	1.93067	1.73033	1.82733	1.40167	1.77833	1.76733	1.47733	1.81967	1.72533	1.92767	1.71367	1.898	1.54533	1.87533	1.53767	1.66333	1.53733	1.75667	1.754	1.76	1.622	1.78767	1.489	1.77367
10-18%	Cilk1 cKO	0.631667	0.665333	0.519667	0.647333	0.666333	0.56	0.528333	0.575333	0.674	0.718333	0.673667	0.738333	0.626667	0.729	0.698333	0.712667	0.615333	0.650333	0.532333	0.580333	0.662	0.629	0.593667	0.593667	0.672333	0.662333	0.696667	0.602667	0.606667	0.534333	0.665333	0.645333	0.677333	0.784667	0.635	0.707333	0.619667	0.658667	0.68	0.690667	0.634333	0.603667	0.508667	0.473	0.493	0.58	0.641333	0.684667
	Control	0.837333	0.772	0.825333	0.850333	0.881667	0.811667	0.793	0.865	0.868667	0.82	0.786667	0.81	0.864667	0.817	0.81	0.901667	0.892667	0.892667	0.784	0.821	0.847667	0.817667	0.851667	0.783333	0.740333	0.757667	0.795	0.775	0.738333	0.796667	0.905333	0.814333	0.862333	0.736	0.814333	0.760333	0.804	0.780667	0.797667	0.825333	0.76	0.905	0.859667	0.850667	0.851667	0.838667	0.784	0.814667
28-36%	Cilk1 cKO	0.874333	1.06267	0.998667	1.013	0.989333	0.823	0.901333	0.817333	0.867	0.836333	0.850667	0.872333	0.839	0.884667	0.912667	0.870333	0.833333	0.806333	0.953	0.776	0.702667	0.898	0.717333	0.826667	0.719667	0.927667	0.840667	0.822	0.946	0.907333	0.811667	0.883667	0.864	0.835333	0.800667	0.759	0.824333	0.848	0.889333	0.669667	0.805333	0.849333	0.819667	0.908667	0.81	0.803	0.994	0.979
	Control	1.023	0.930667	0.949333	1.02067	0.964	1.033	1.002	1.07067	0.951667	0.978	1.00133	0.932	1.02767	0.975667	0.989	1.03333	1.02067	1.01267	1.00433	1.021	0.973	1.06567	1.088	1.16333	1.09567	1.01833	1.05933	1.03967	0.991333	1.008	1.03767	1.05267	1.005	1.10567	1.03067	1.068	1.01633	1.03467	1.125	1.03133	1.02633	1.07	1.03233	1.06367	1.078	1.053	1.04667	0.992
46-54%	Cilk1 cKO	0.983	0.957	0.992667	1.107	0.964333	1.10833	1.01267	1.013	1.10433	1.001	1.039	0.984333	0.973	1.02633	1.13567	1.05133	1.091	0.988667	0.978667	1.08133	1.06933	1.02367	0.966	1.06733	1.00233	1.116	1.05833	1.076	0.885	0.982667	1.12733	1.053	0.992	1.01233	1.07467	1.18733	1.189	1.133	1.05867	1.023	1.01633	1.21833	1.198	1.20833	1.18033	1.19133	1.21633	1.078
	Control	1.21567	1.18367	1.177	1.26167	1.204	1.18867	1.318	1.26867	1.24567	1.18133	1.14933	1.17133	1.25267	1.23033	1.19567	1.21767	1.25333	1.23967	1.238	1.199	1.22067	1.18833	1.265	1.26533	1.139	1.19733	1.23167	1.22333	1.238	1.23833	1.18	1.226	1.14633	1.226	1.163	1.172	1.23567	1.19167	1.139	1.18833	1.148	1.16933	1.19767	1.17	1.23333	1.191	1.16367	1.18367
64-72%	Cilk1 cKO	1.263	1.33767	1.23733	1.12533	1.22733	1.26833	1.25267	1.09833	1.27967	1.30433	1.319	1.10633	1.302	1.32067	1.295	1.24267	1.308	1.24967	1.268	1.222	1.229	1.14333	1.25333	1.28767	1.32767	1.21	1.332	1.047	1.3	1.13567	1.26567	1.16533	1.26533	1.34433	1.194	1.291	1.176	1.29367	1.289	1.242	1.129	1.27967	1.33733	1.211	1.29133	1.09433	1.242	1.239
	Control	1.52367	1.41233	1.518	1.44933	1.497	1.49367	1.53033	1.55533	1.48767	1.44567	1.459	1.45433	1.51267	1.535	1.475	1.42633	1.42467	1.436	1.43433	1.56033	1.48233	1.58933	1.42067	1.50667	1.47633	1.51833	1.521	1.43433	1.43267	1.64333	1.42533	1.40067	1.36967	1.379	1.301	1.29467	1.33567	1.301	1.27433	1.387	1.51033	1.50933	1.41	1.46233	1.554	1.503	1.42033	1.471
82-90%	Cilk1 cKO	1.94	1.59667	1.59467	1.94367	1.68333	1.57667	1.82933	1.748	1.88267	1.68767	1.591	1.51067	1.61	1.749	1.76267	1.82233	1.76667	1.832	1.64967	1.723	1.728	1.69133	1.822	1.59767	1.93067	1.73033	1.82733	1.40167	1.77833	1.76733	1.47733	1.81967	1.72533	1.92767	1.71367	1.898	1.54533	1.87533	1.53767	1.66333	1.53733	1.75667	1.754	1.76	1.622	1.78767	1.489	1.77367
	Control	1.924	1.689	1.84867	1.83633	1.71467	1.94233	1.74367	1.71267	1.70467	1.92	1.92667	1.73167	1.97067	1.74133	1.92733	1.851	1.83467	1.89	1.95767	1.86967	1.89533	1.666	1.76	1.92767	2.04133	1.96133	2.109	2.21733	1.915	1.84533	1.85667	1.90933	1.87033	1.72867	1.83833	1.69133	1.696	1.72867	1.85267	2.27667	1.91767	1.87167	1.87033	1.764	1.83467	1.764	1.841	1.80667
[truncated: 42 more columns]
